# Supplementary material for: Nickel/Brønsted Acid-Catalyzed Chemo- and Enantioselective Intermolecular Hydroamination of Conjugated Dienes
Source: PubMed Central journal article supplement — iScience. 2019 Nov 11;22:369–79. doi: 10.1016/j.isci.2019.11.008 (PMC6906649; doi:10.1016/j.isci.2019.11.008), 2019-11-11
Supplement: mmc1.pdf [file mmc1.pdf]

**ISCI, Volume 22**

**Supplemental Information**

**Nickel/Brønsted Acid-Catalyzed**

**Chemo- and Enantioselective Intermolecular**

**Hydroamination of Conjugated Dienes**

**Jiao Long, Peng Wang, Wang Wang, Yuqiang Li, and Guoyin Yin**

Supplemental figures for  $^1\text{H}$ ,  $^{13}\text{C}$  and  $^{19}\text{F}$ -NMR spectra of substrate 1a-1j.

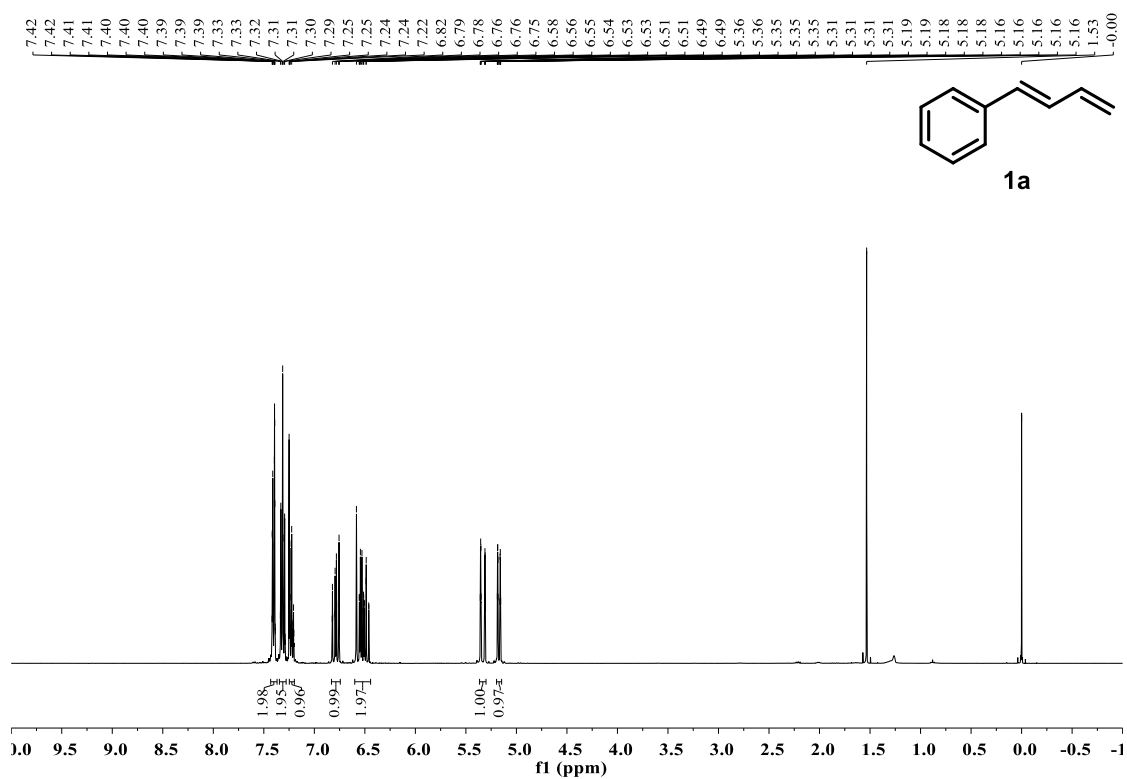

Figure S1.  $^1\text{H}$  NMR spectra of substrate **1a**, related to Figure 2.

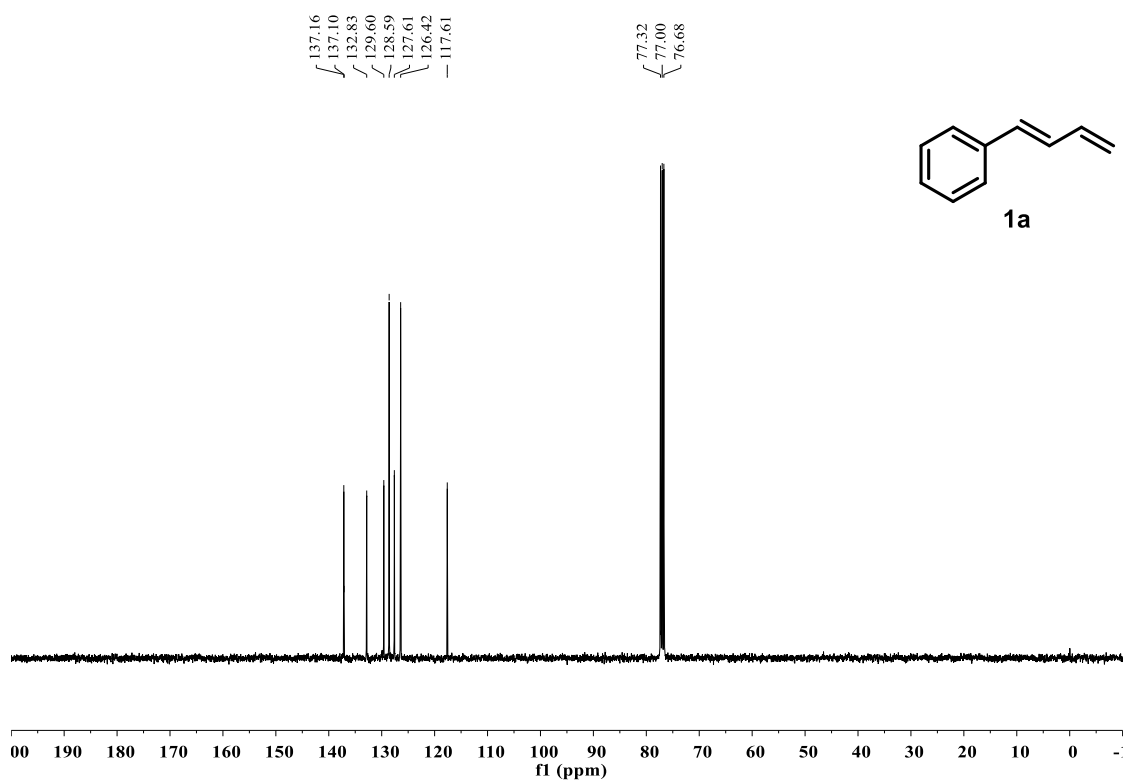

Figure S2.  $^{13}\text{C}$  NMR spectra of substrate **1a**, related to Figure 2.

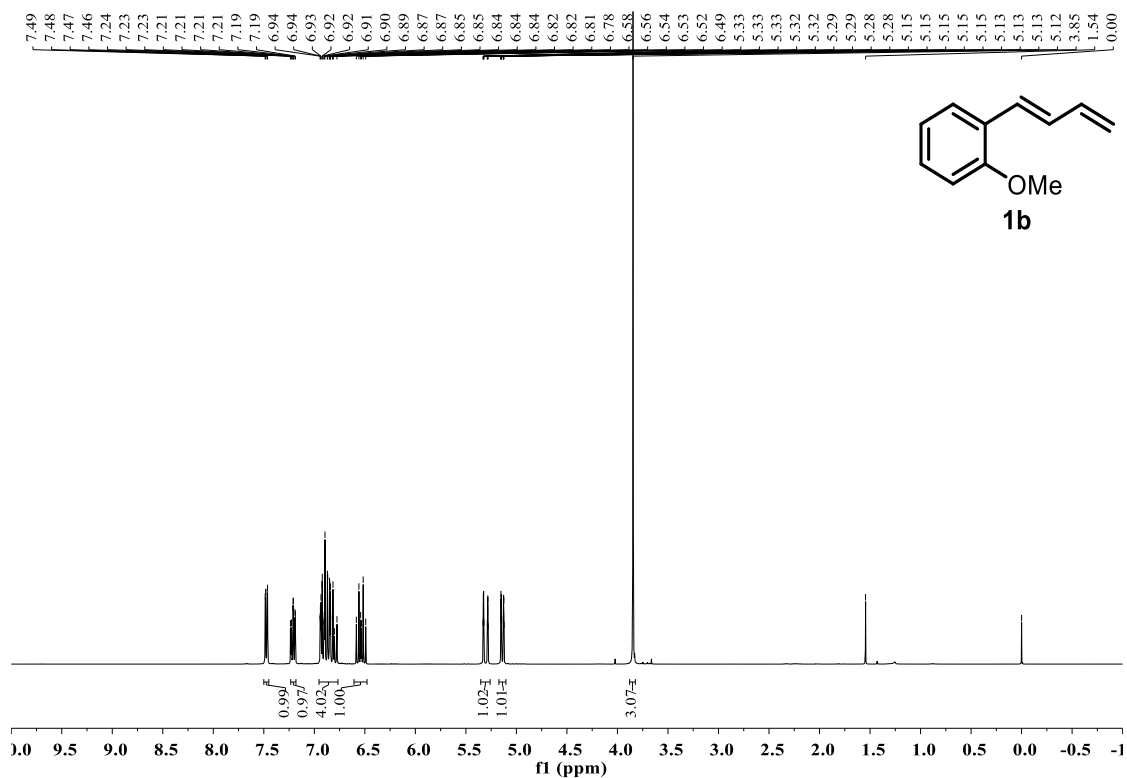

**Figure S3.** <sup>1</sup>H NMR spectra of substrate **1b**, related to **Figure 4**.

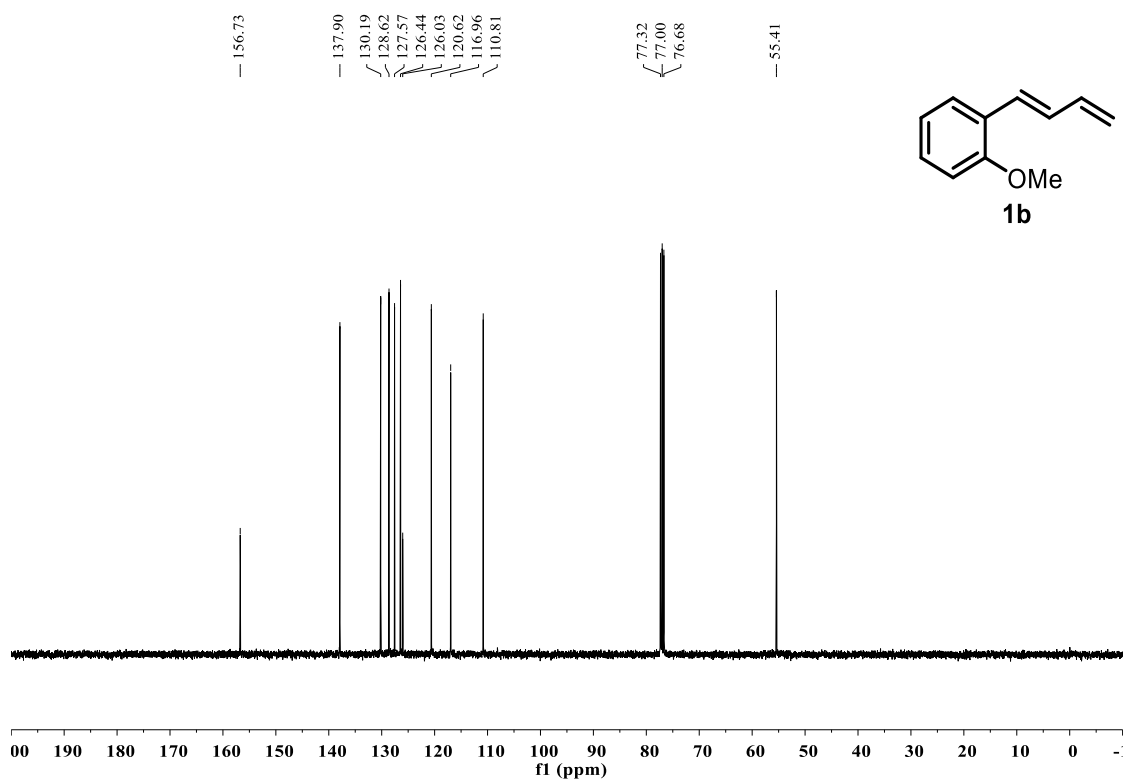

**Figure S4.** <sup>13</sup>C NMR spectra of substrate **1b**, related to **Figure 4**.

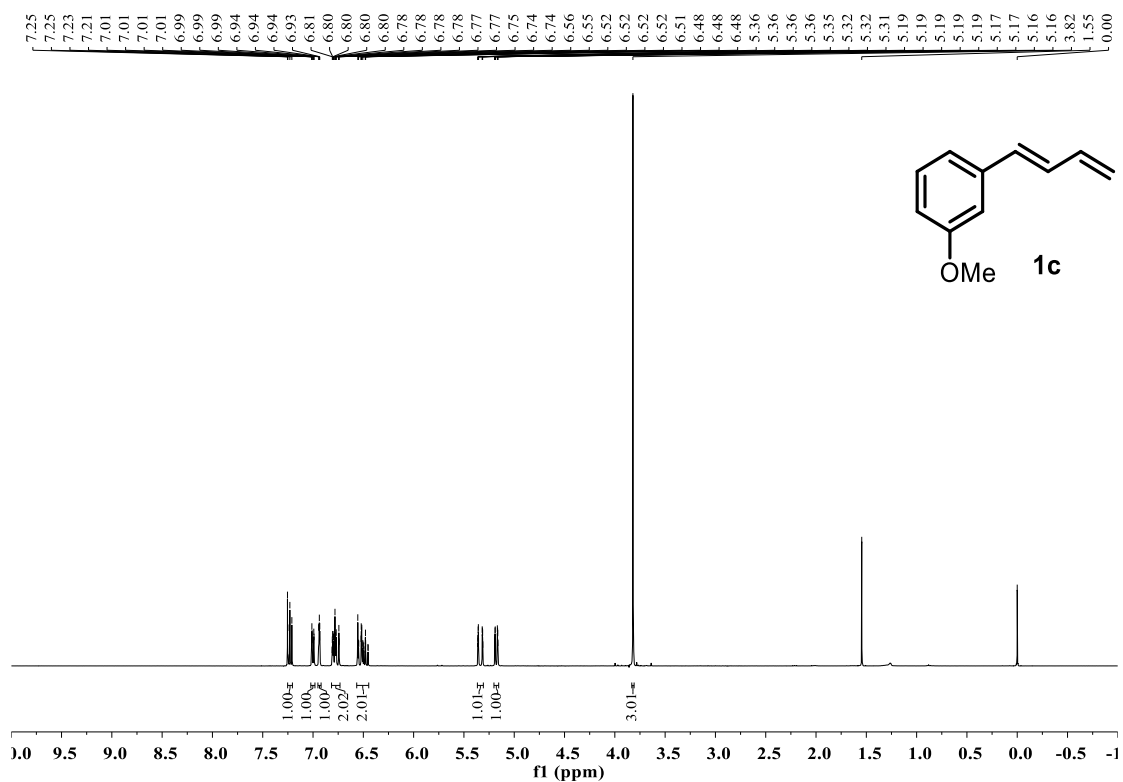

Figure S5. <sup>1</sup>H NMR spectra of substrate **1c**, related to Figure 4.

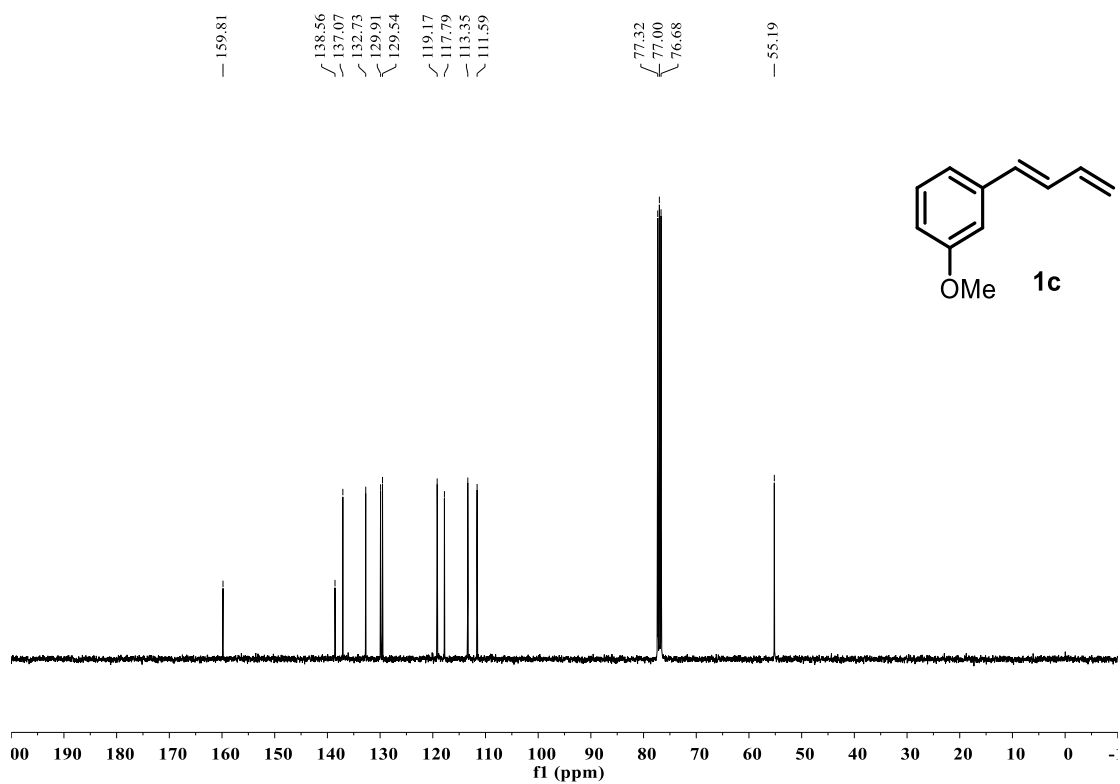

Figure S6. <sup>13</sup>C NMR spectra of substrate **1c**, related to Figure 4.

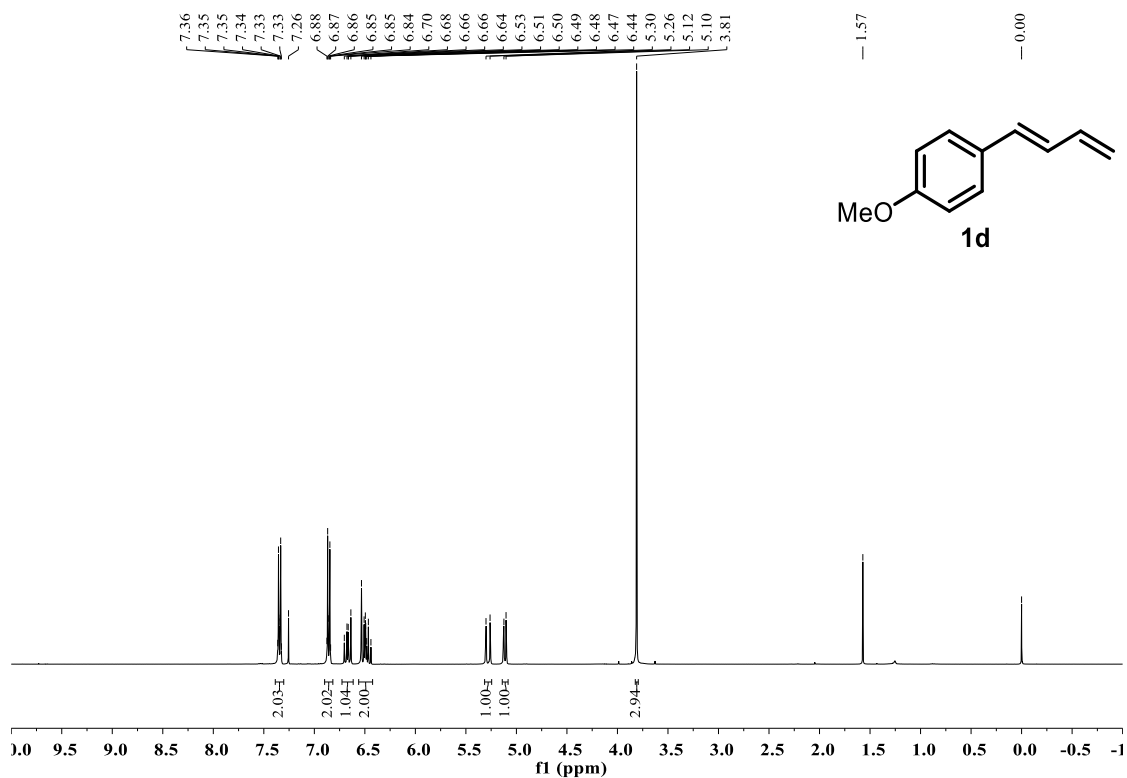

**Figure S7.** <sup>1</sup>H NMR spectra of substrate **1d**, related to **Figure 4**.

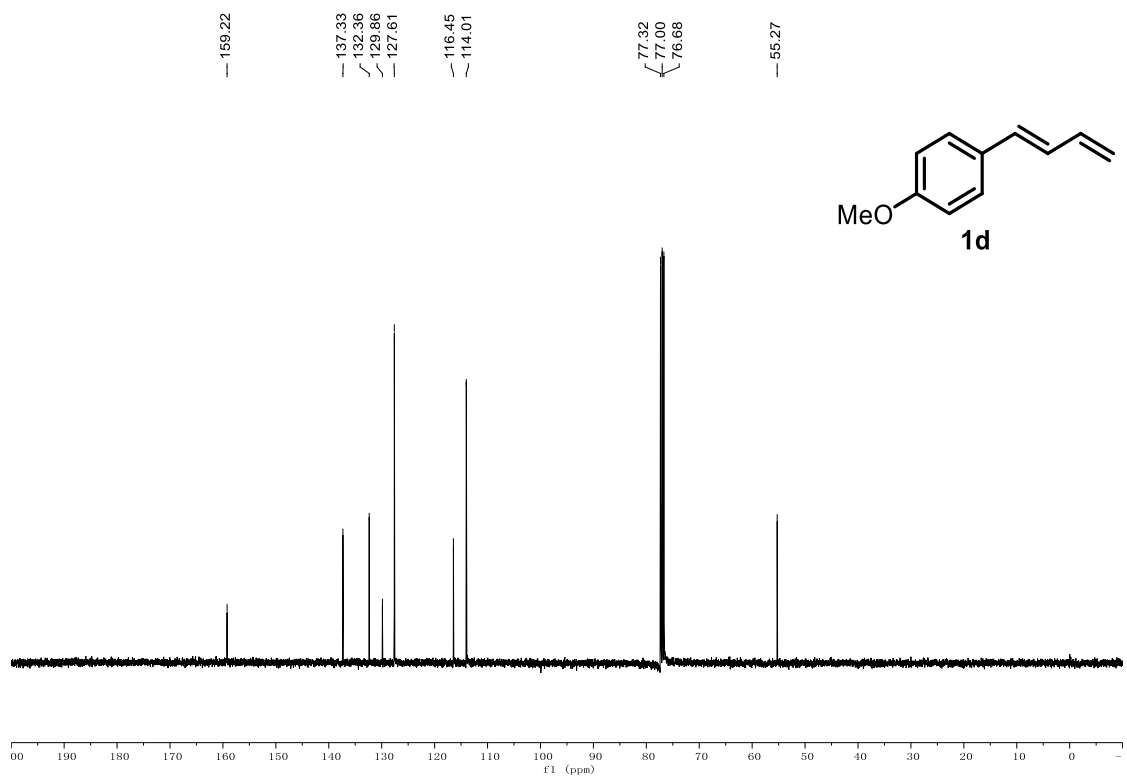

**Figure S8.** <sup>13</sup>C NMR spectra of substrate **1d**, related to **Figure 4**.

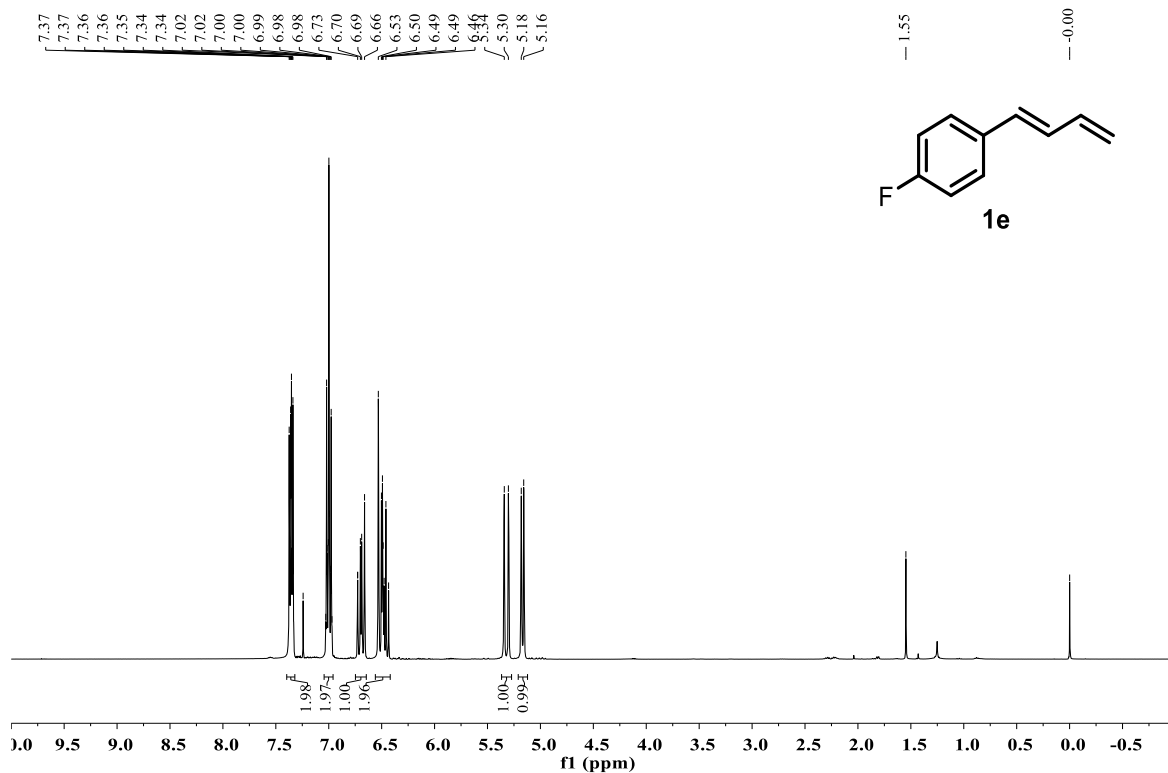

Figure S9. <sup>1</sup>H NMR spectra of substrate **1e**, related to Figure 4.

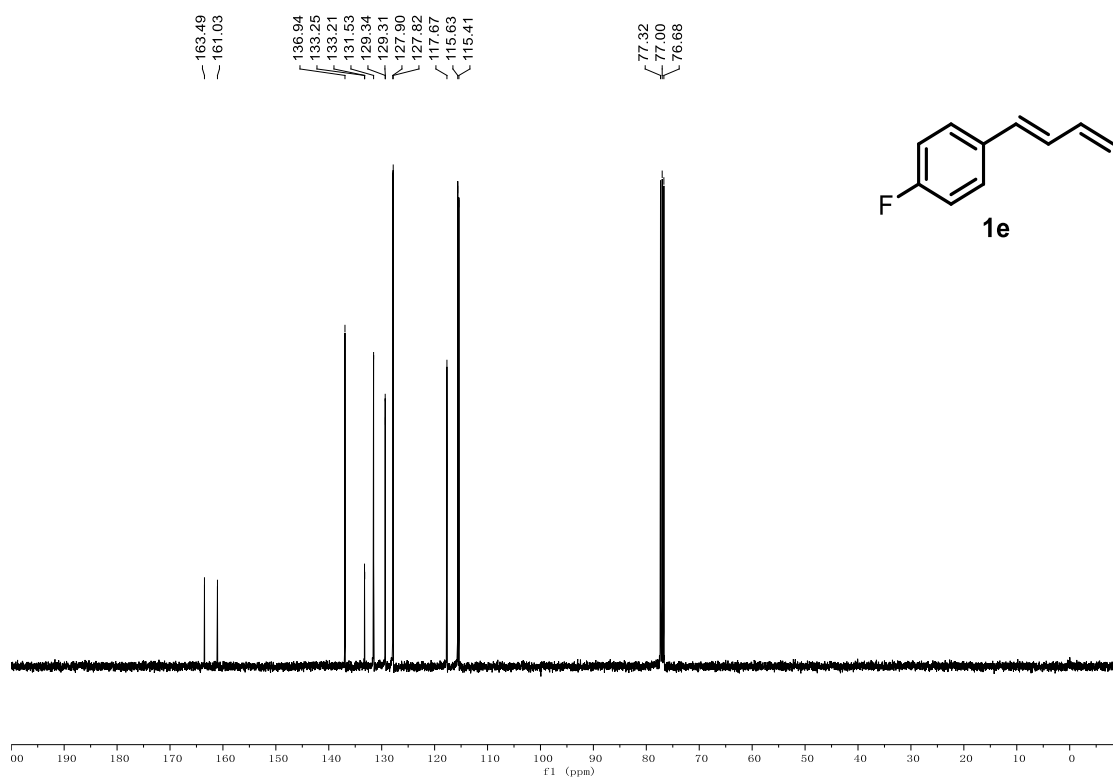

Figure S10. <sup>13</sup>C NMR spectra of substrate **1e**, related to Figure 4.

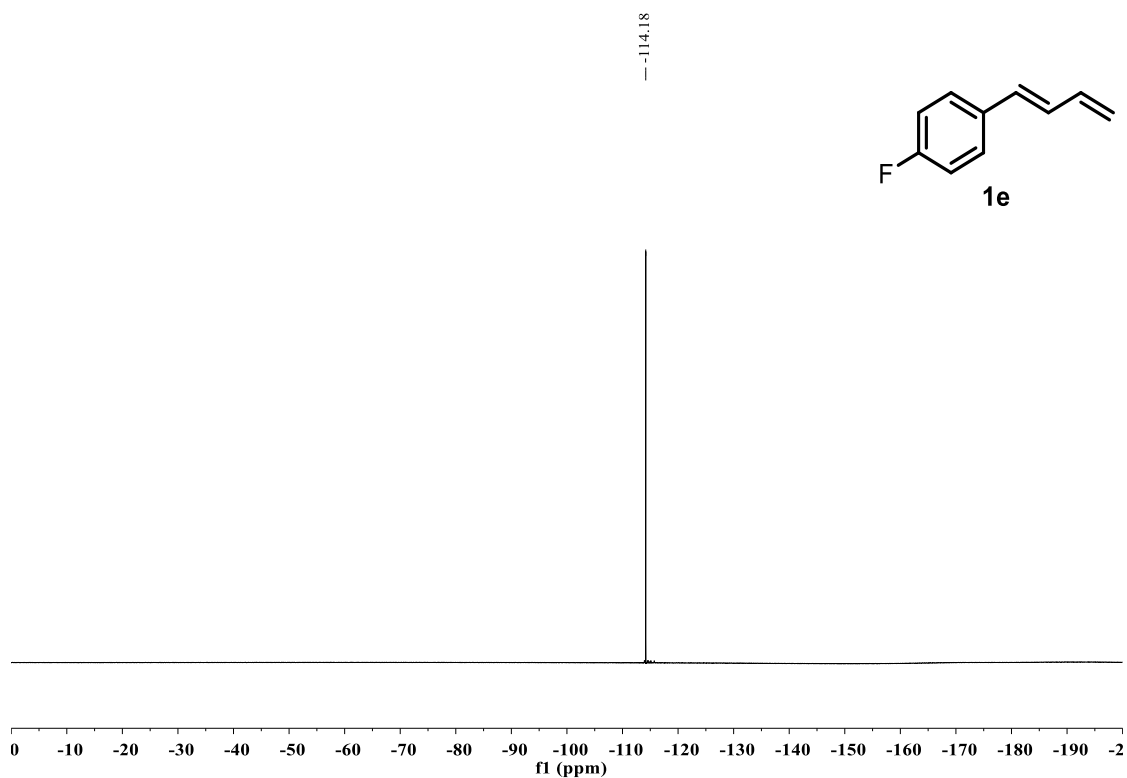

**Figure S11.**  $^{19}\text{F}$  NMR spectra of substrate **1e**, related to **Figure 4**.

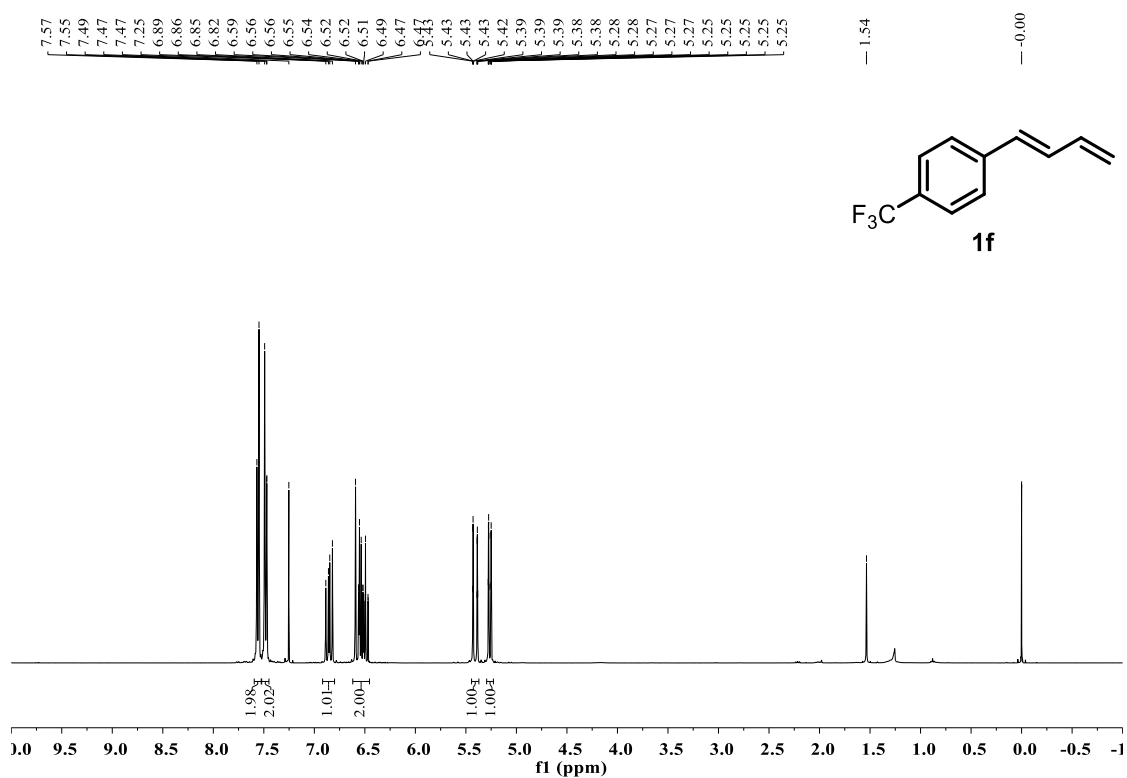

**Figure S12.**  $^1\text{H}$  NMR spectra of substrate **1f**, related to **Figure 4**.

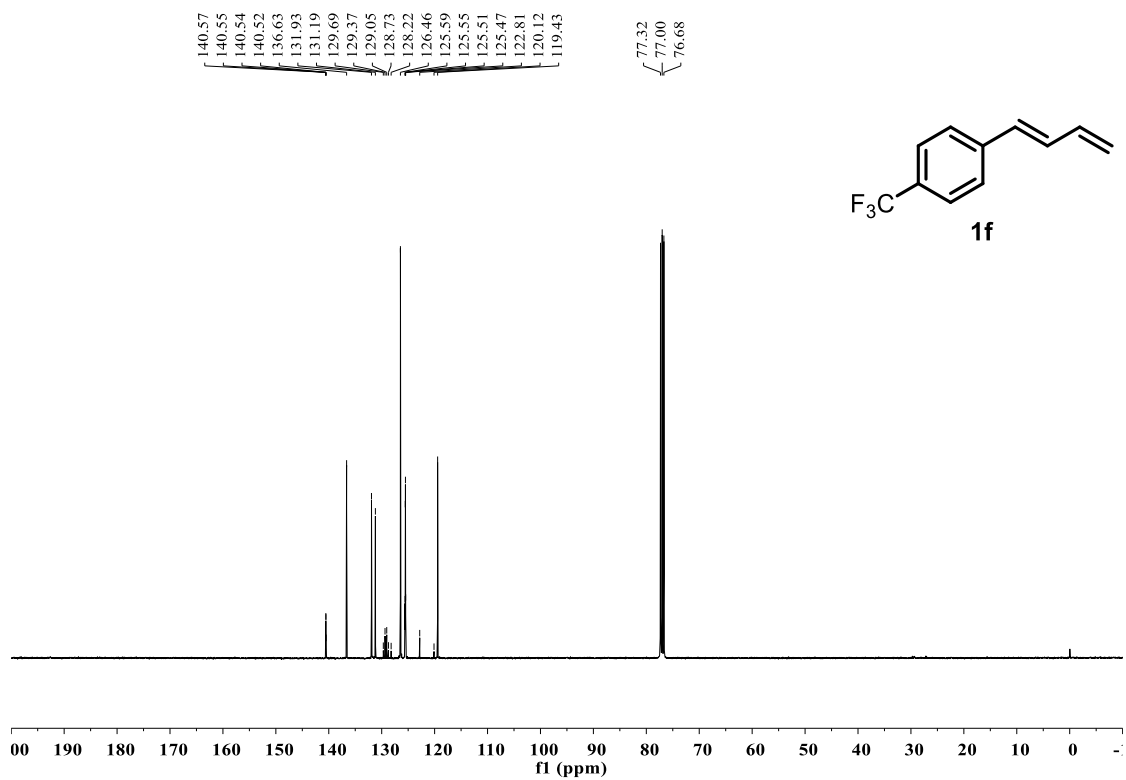

**Figure S13.** <sup>13</sup>C NMR spectra of substrate **1f**, related to **Figure 4**.

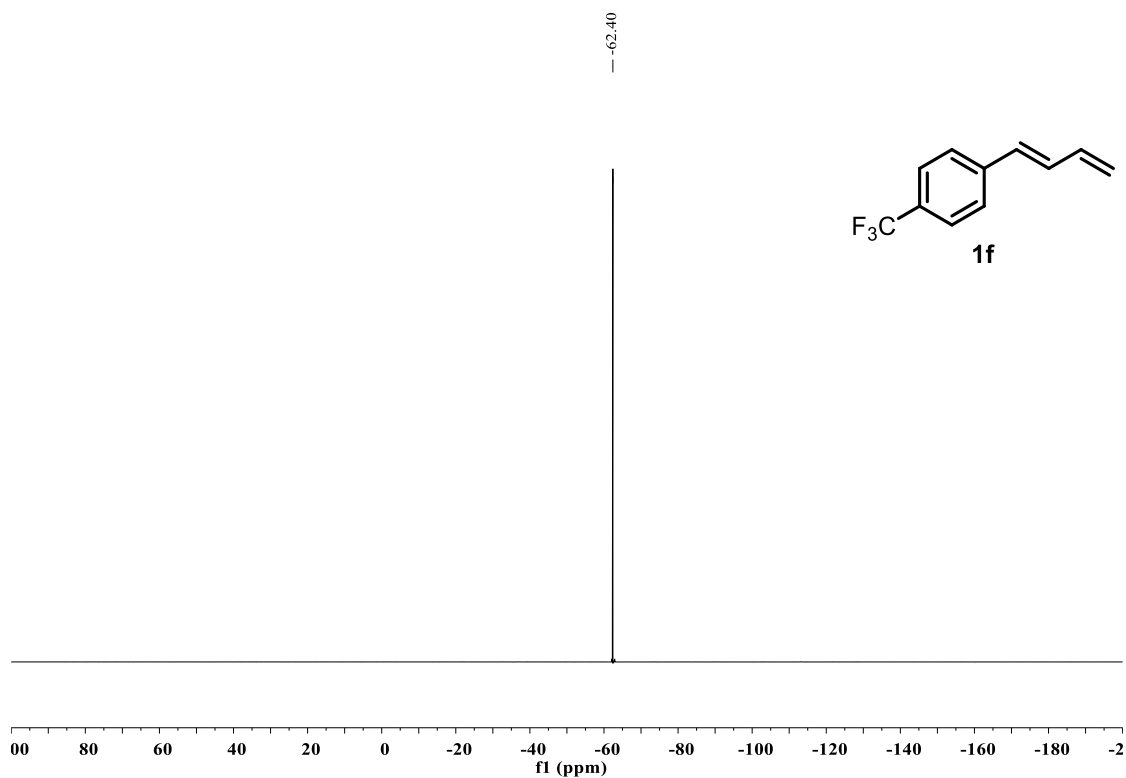

**Figure S14.** <sup>19</sup>F NMR spectra of substrate **1f**, related to **Figure 4**.



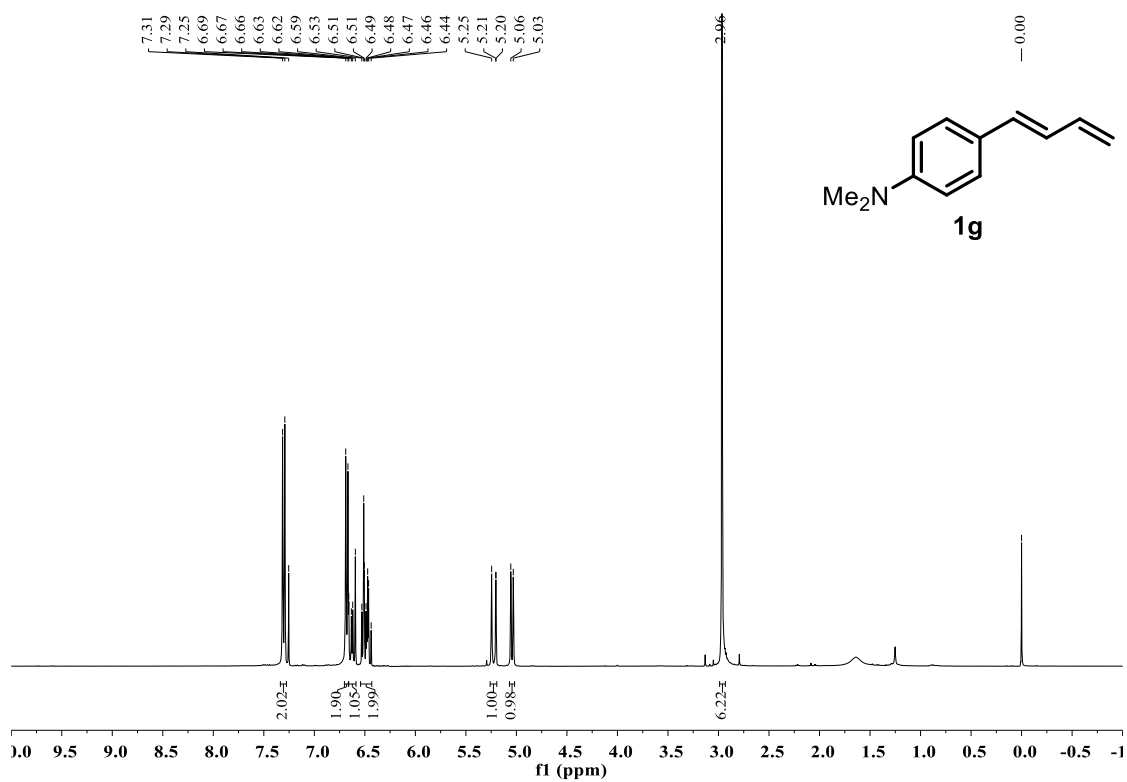

**Figure S15.** <sup>1</sup>H NMR spectra of substrate **1g**, related to **Figure 4**.

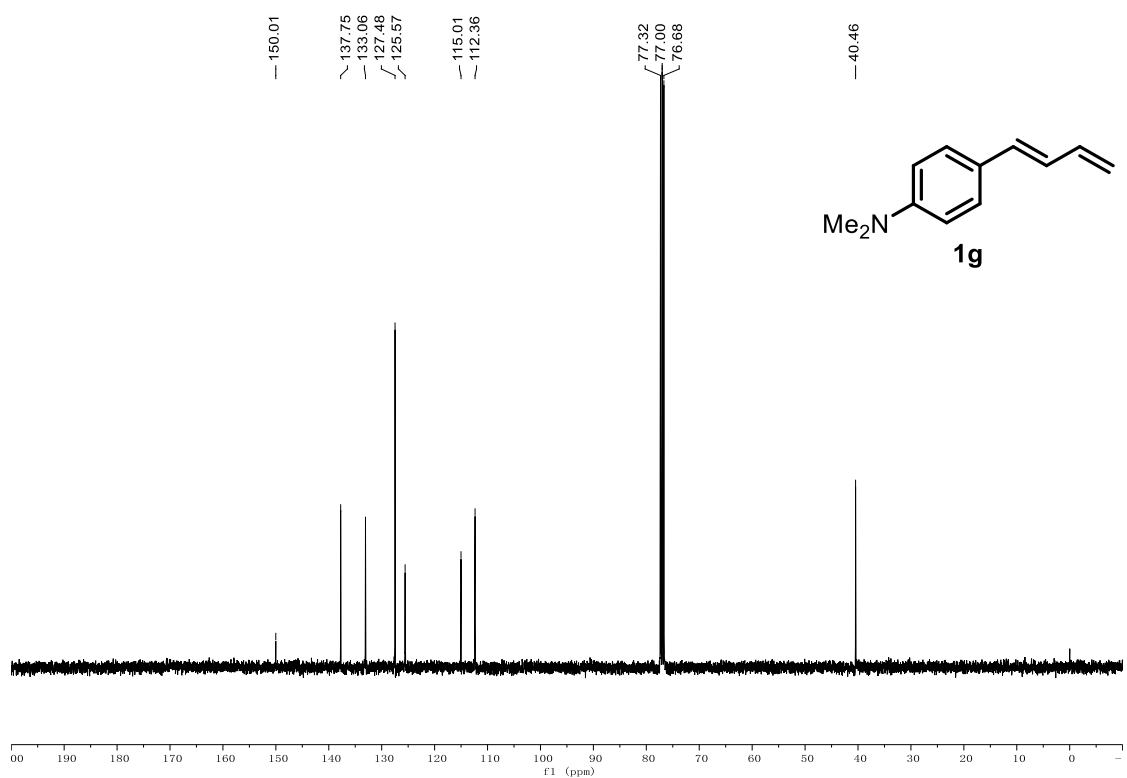

**Figure S16.** <sup>13</sup>C NMR spectra of substrate **1g**, related to **Figure 4**.

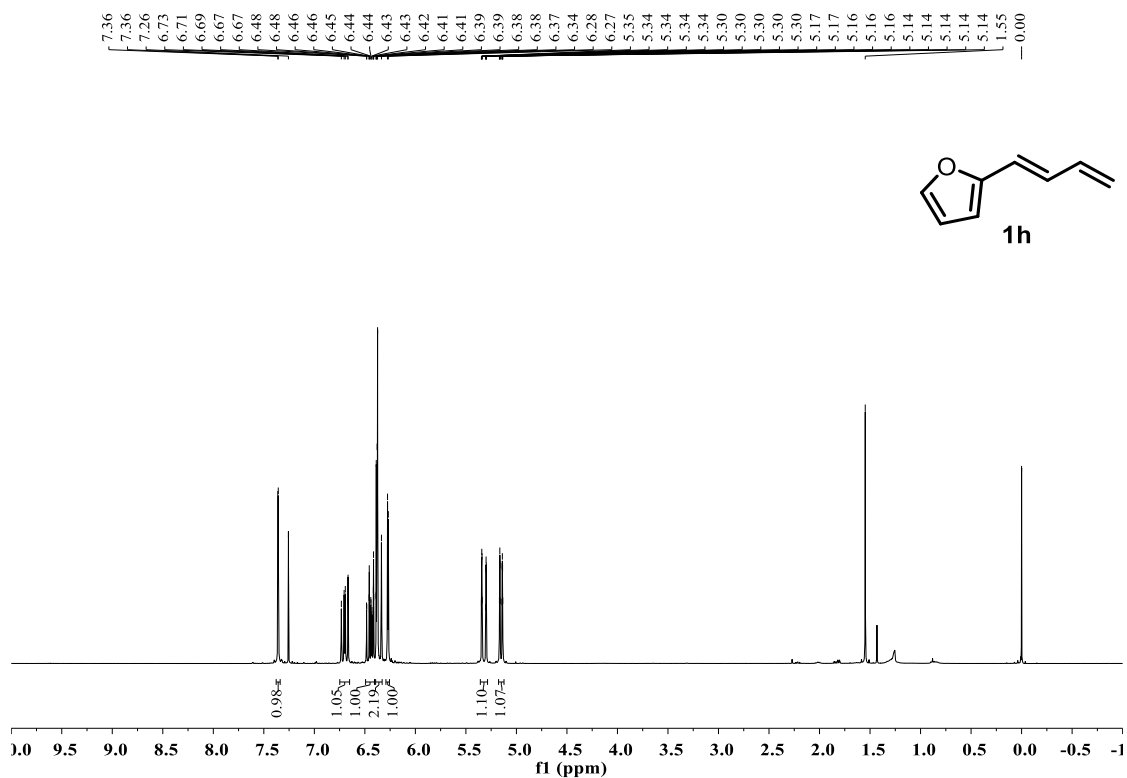

**Figure S17.** <sup>1</sup>H NMR spectra of substrate **1h**, related to **Figure 4**.

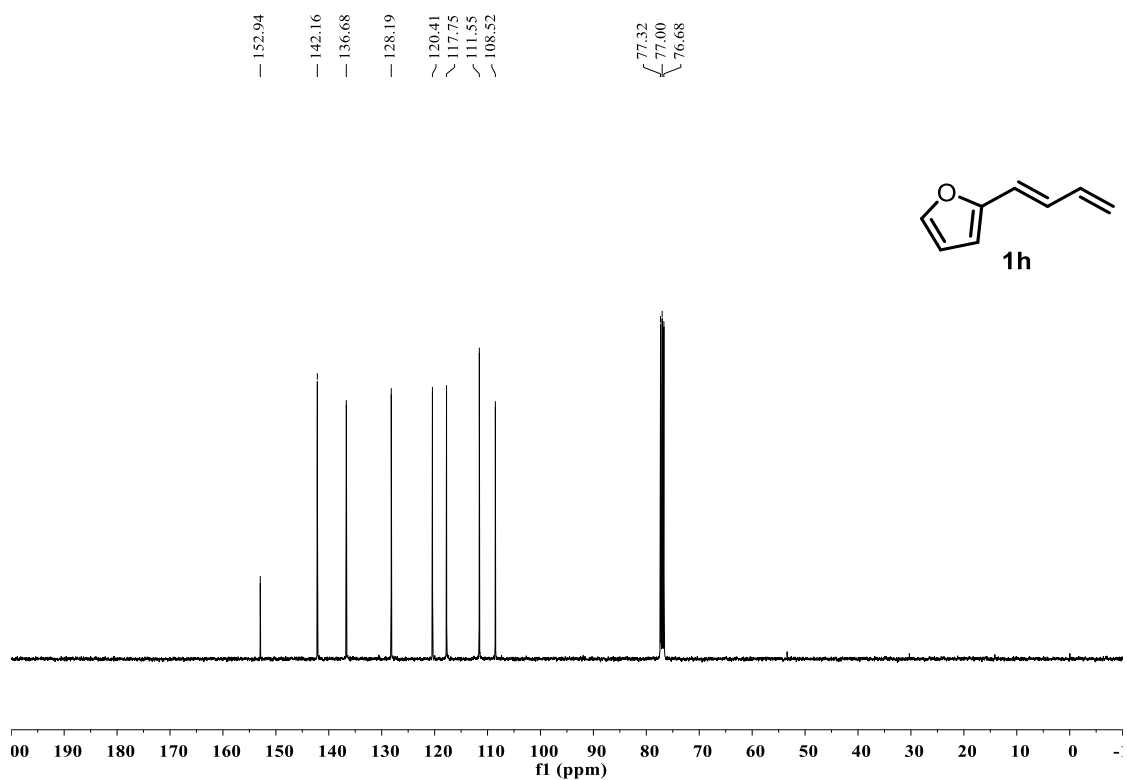

**Figure S18.** <sup>13</sup>C NMR spectra of substrate **1h**, related to **Figure 4**.

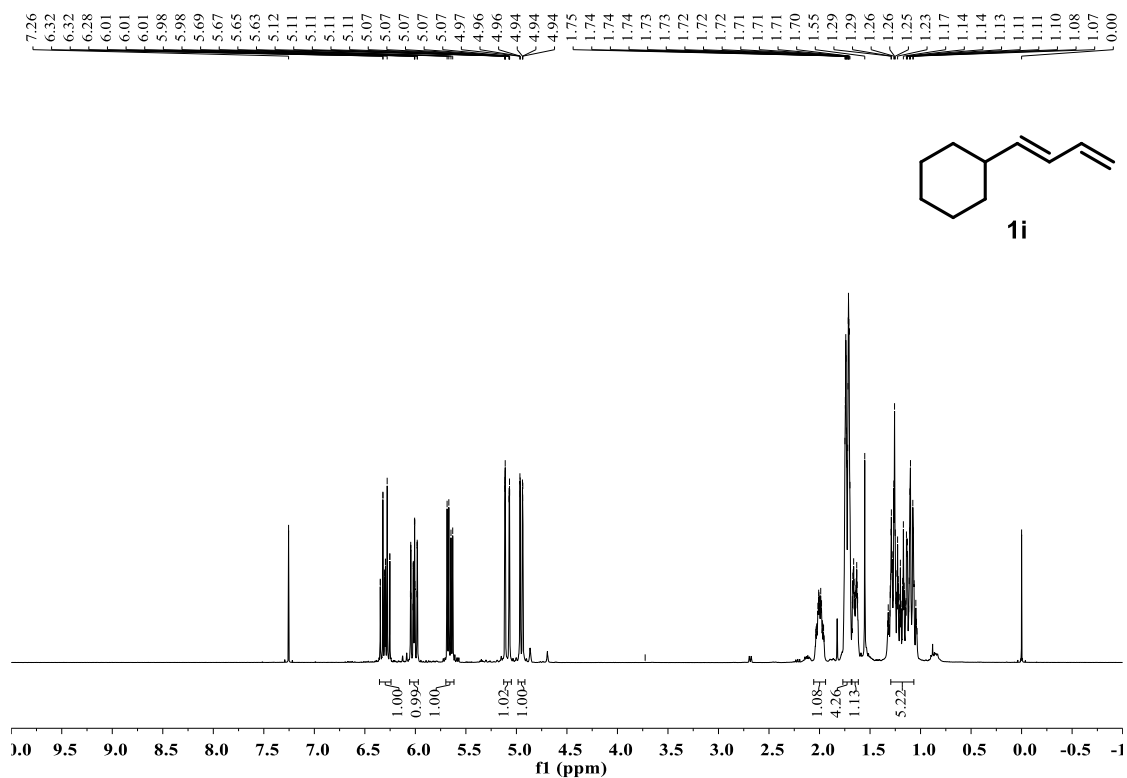

**Figure S19.** <sup>1</sup>H NMR spectra of substrate **1i**, related to **Figure 4**.

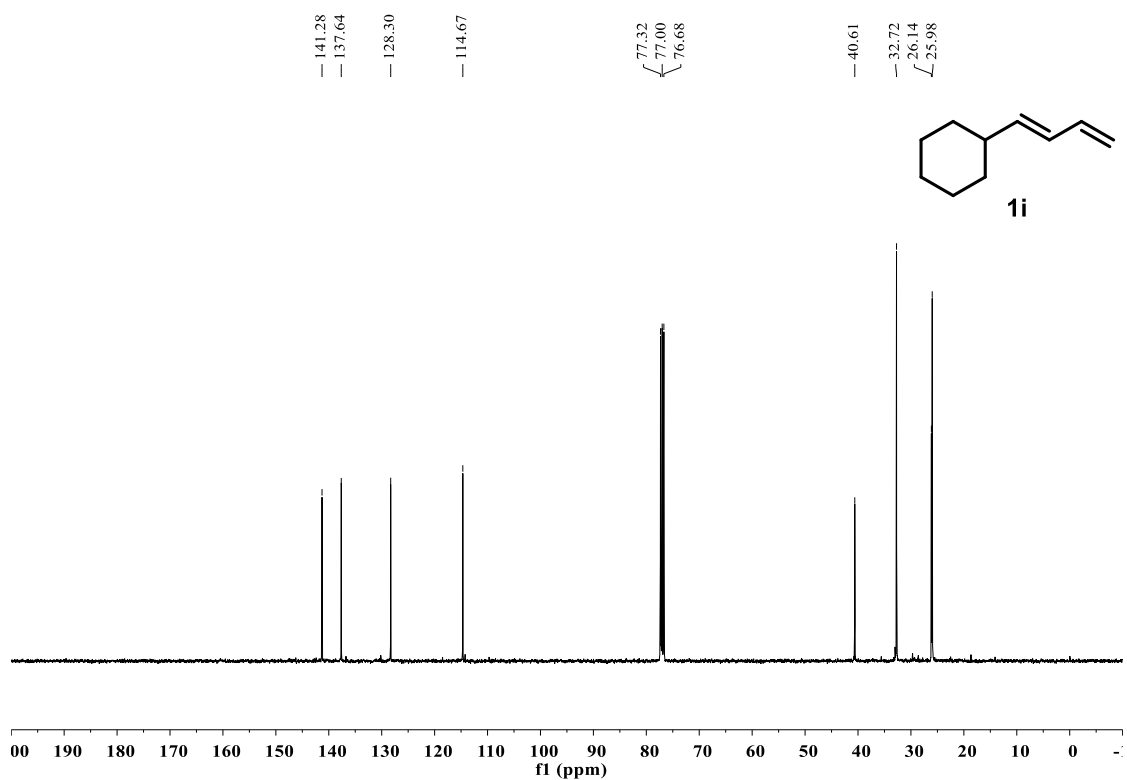

**Figure S20.** <sup>13</sup>C NMR spectra of substrate **1i**, related to **Figure 4**.

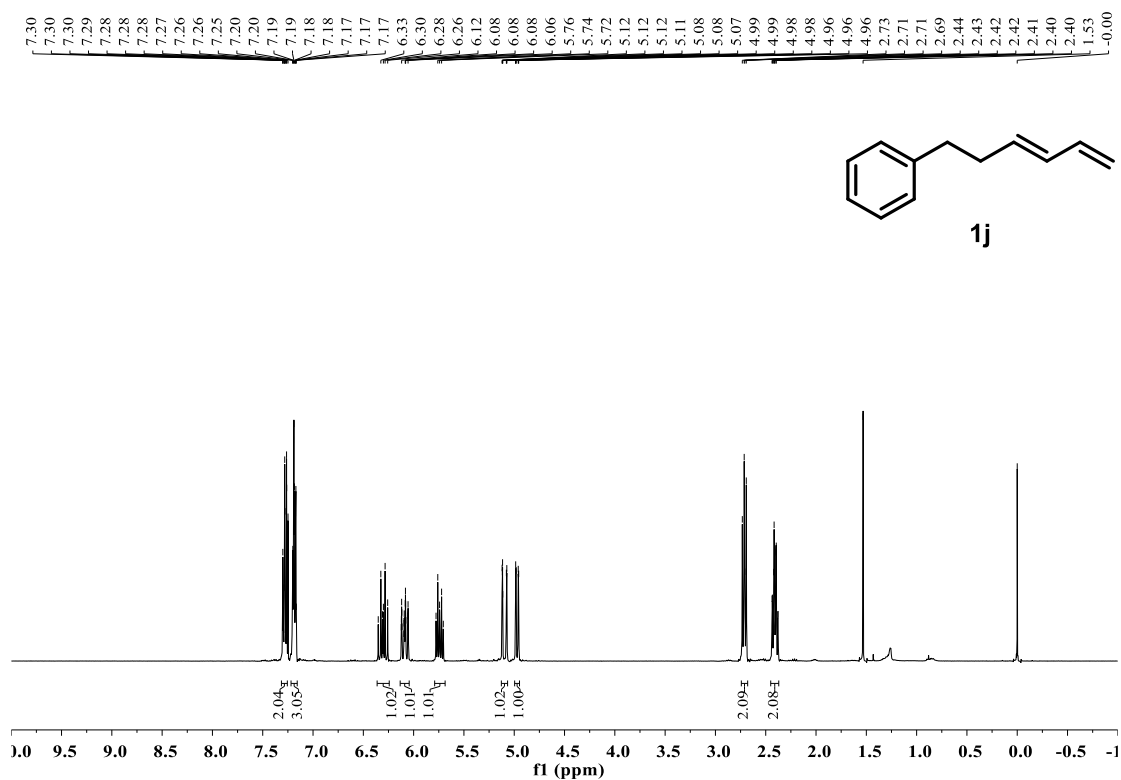

**Figure S21.**  $^1\text{H}$  NMR spectra of substrate **1j**, related to **Figure 4**.

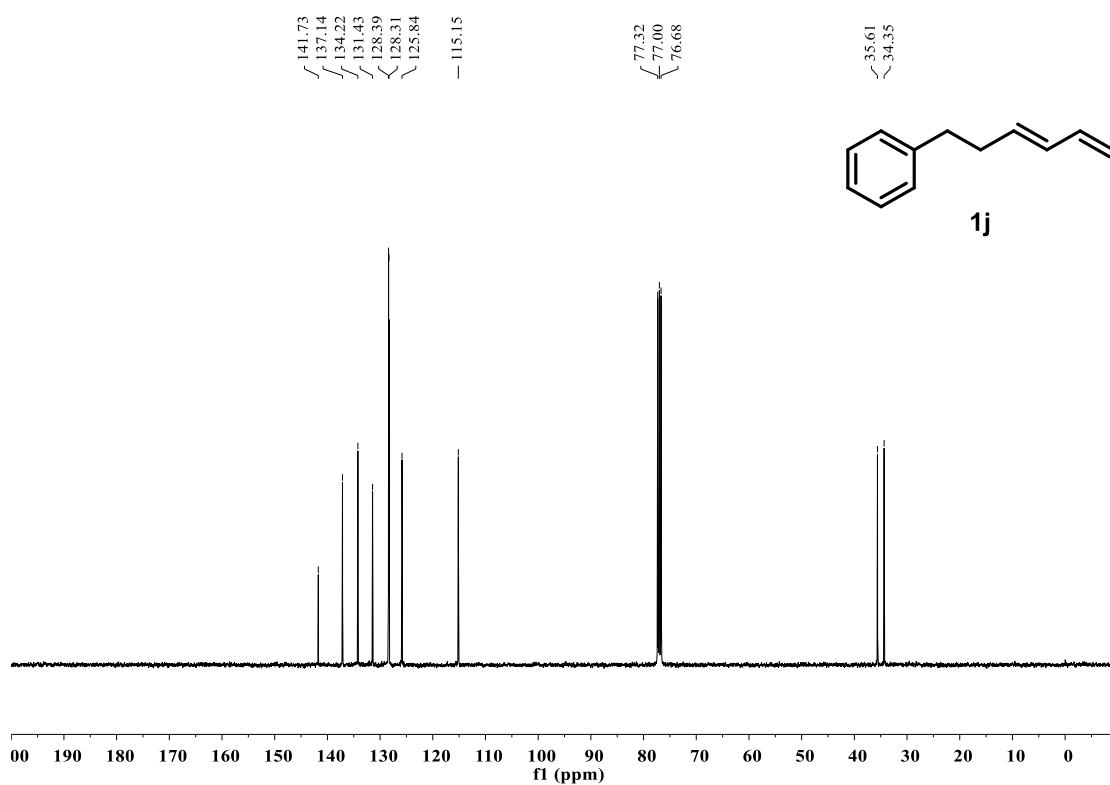

**Figure S22.**  $^{13}\text{C}$  NMR spectra of substrate **1j**, related to **Figure 4**.

Supplemental figures for  $^1\text{H}$ ,  $^{13}\text{C}$  and  $^{19}\text{F}$ -NMR spectra of products 3a-3bd.

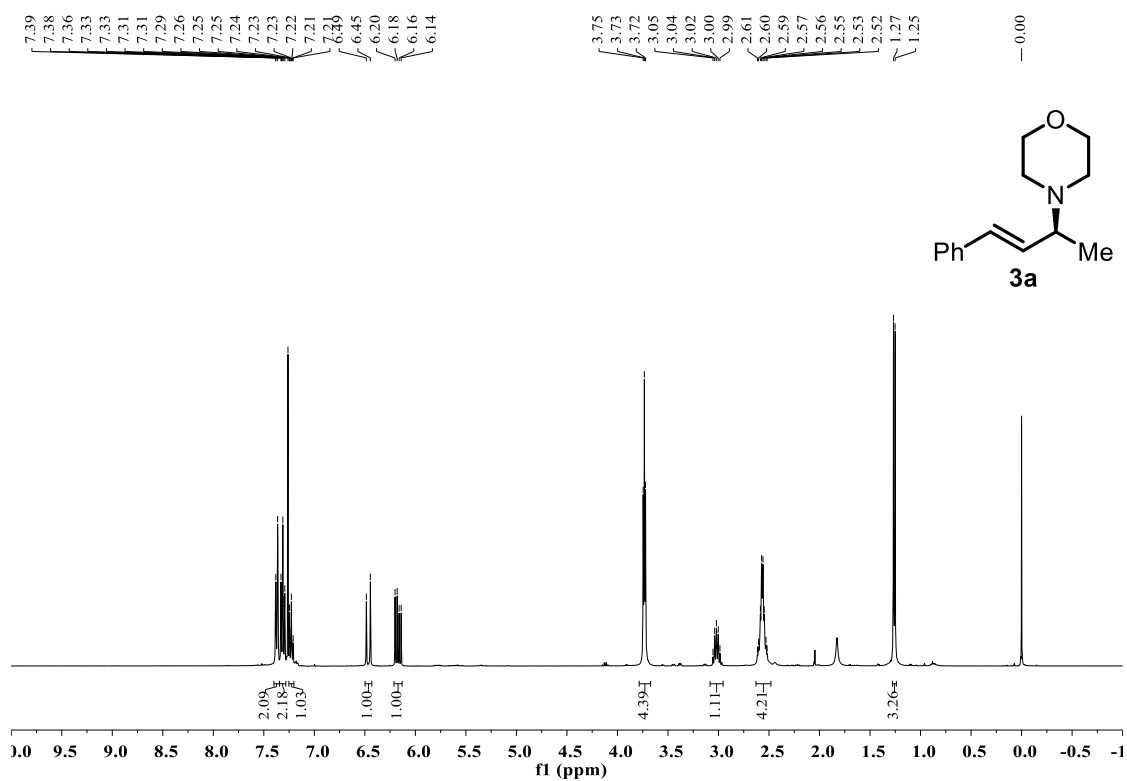

Figure S23.  $^1\text{H}$  NMR spectra of **3a**, related to Figure 3.

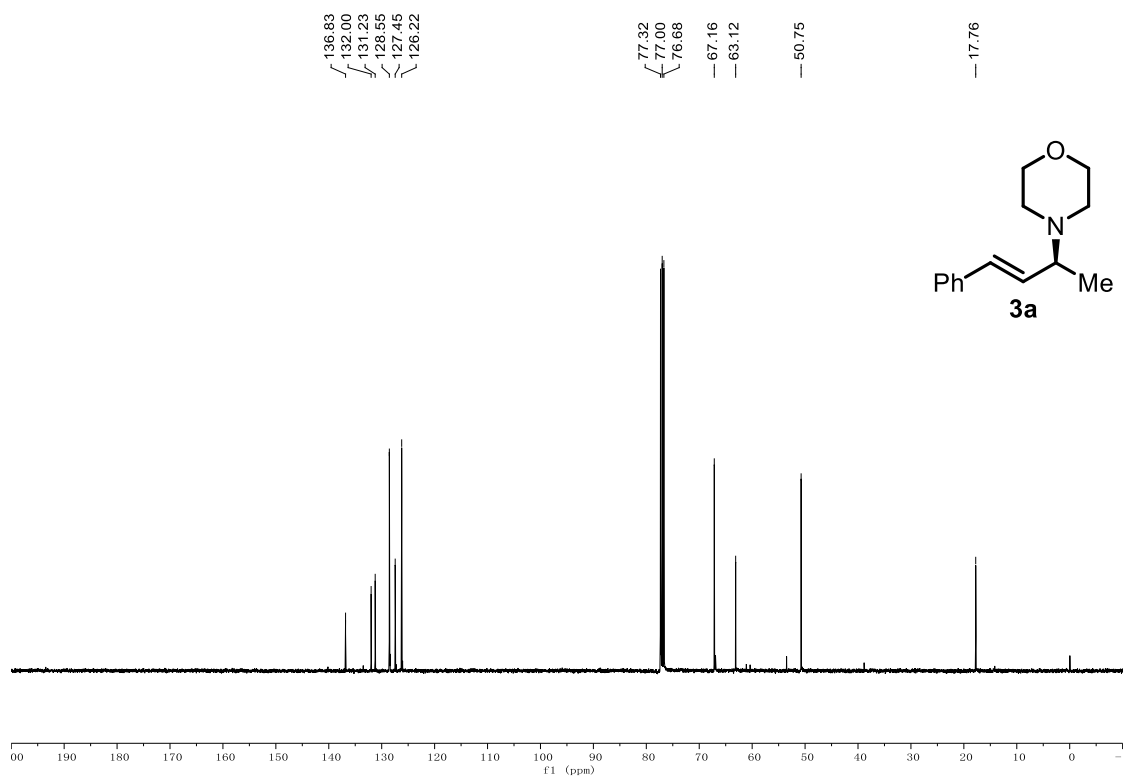

Figure S24.  $^{13}\text{C}$  NMR spectra of **3a**, related to Figure 3.

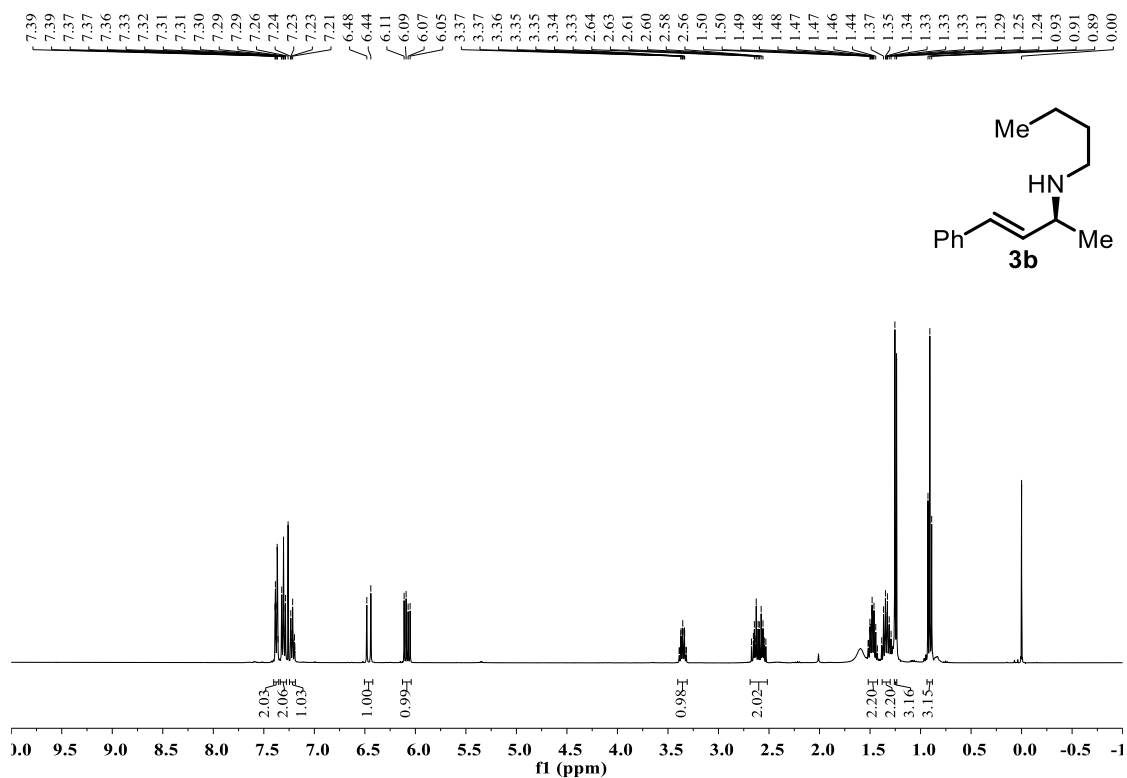

**Figure S25.** <sup>1</sup>H NMR spectra of **3b**, related to **Figure 3**.

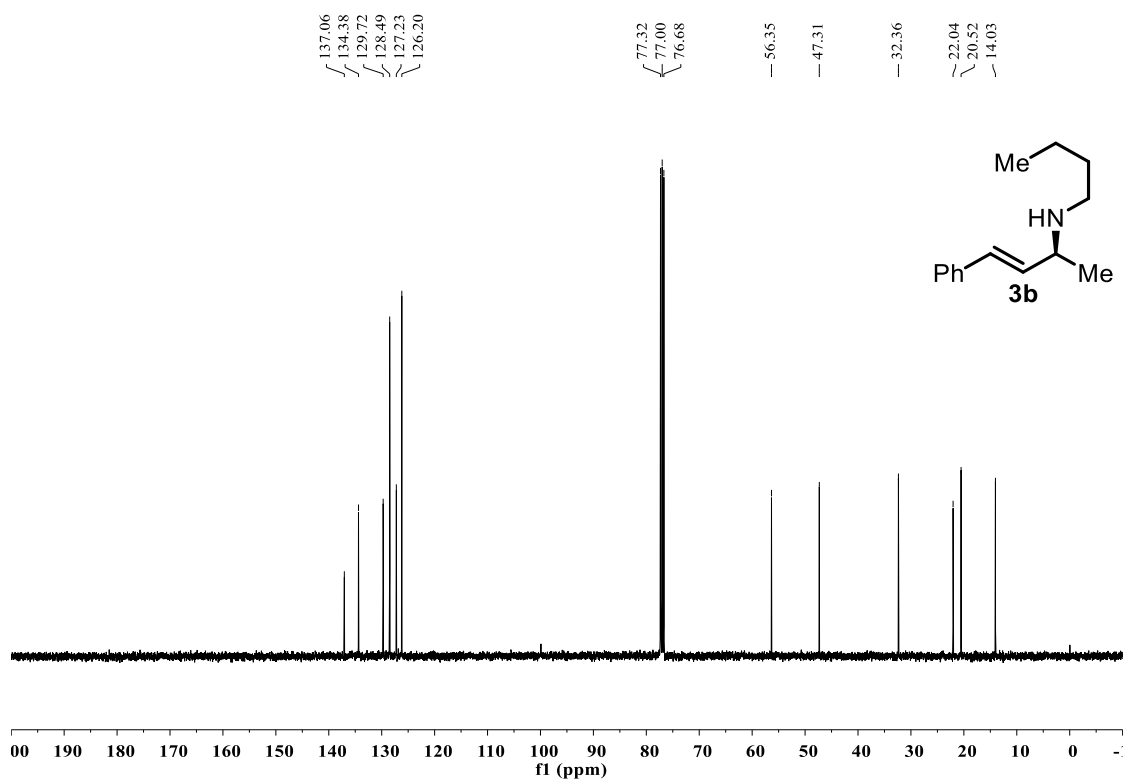

**Figure S26.** <sup>13</sup>C NMR spectra of **3b**, related to **Figure 3**.

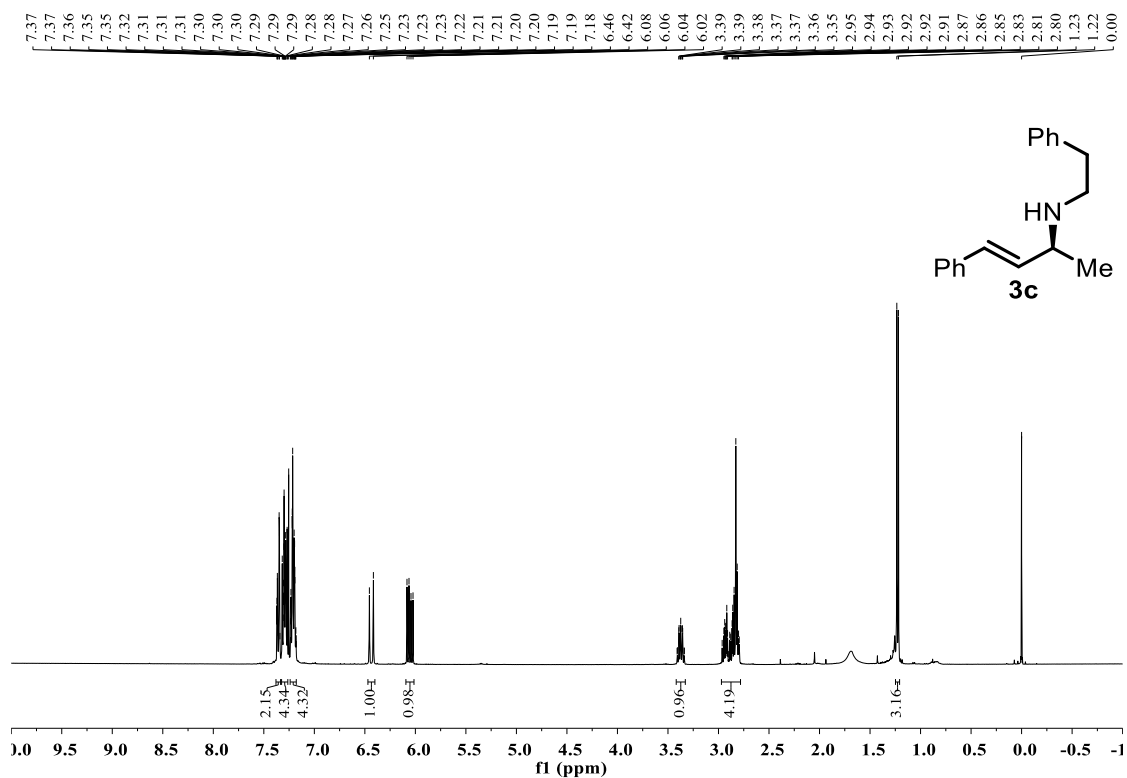

Figure S27. <sup>1</sup>H NMR spectra of **3c**, related to Figure 3.

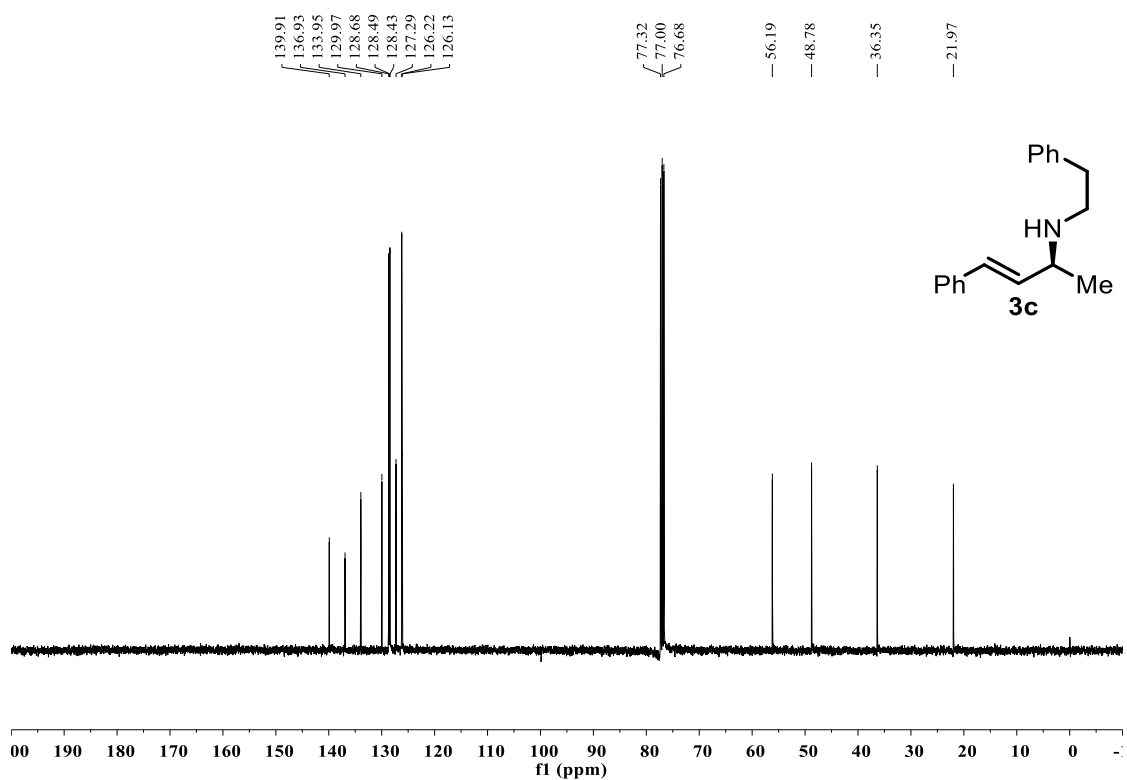

Figure S28. <sup>13</sup>C NMR spectra of **3c**, related to Figure 3.

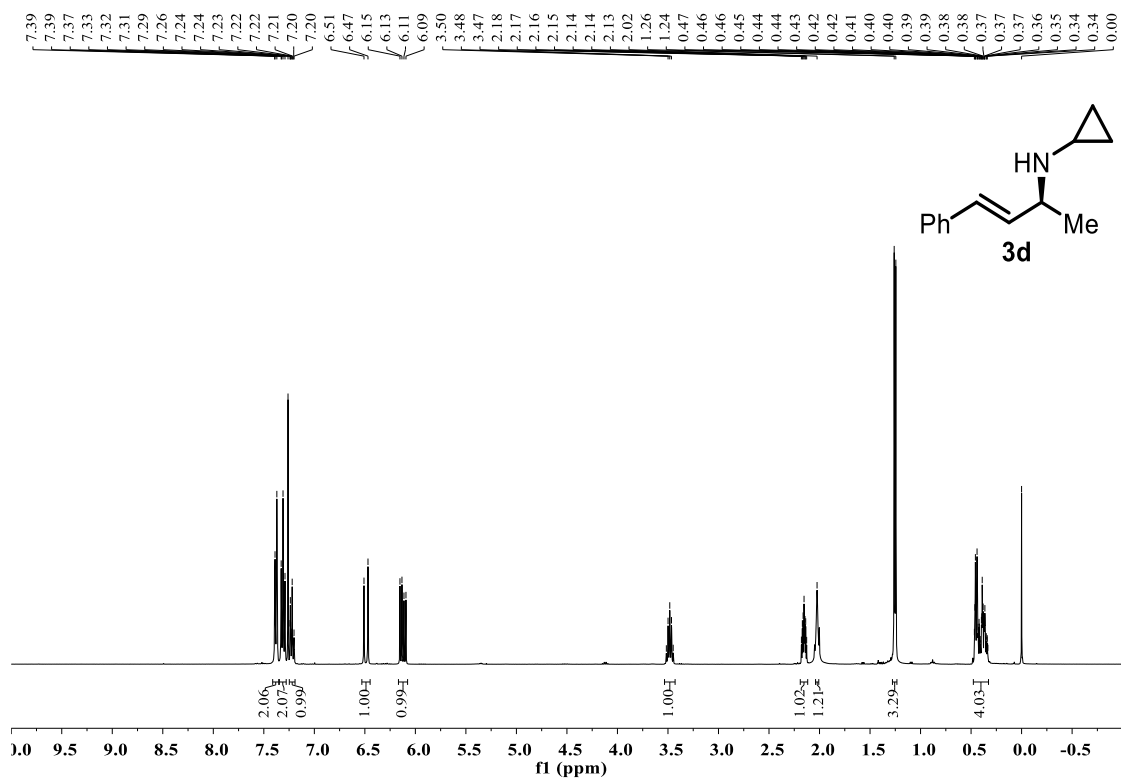

**Figure S29.** <sup>1</sup>H NMR spectra of **3d**, related to **Figure 3**.

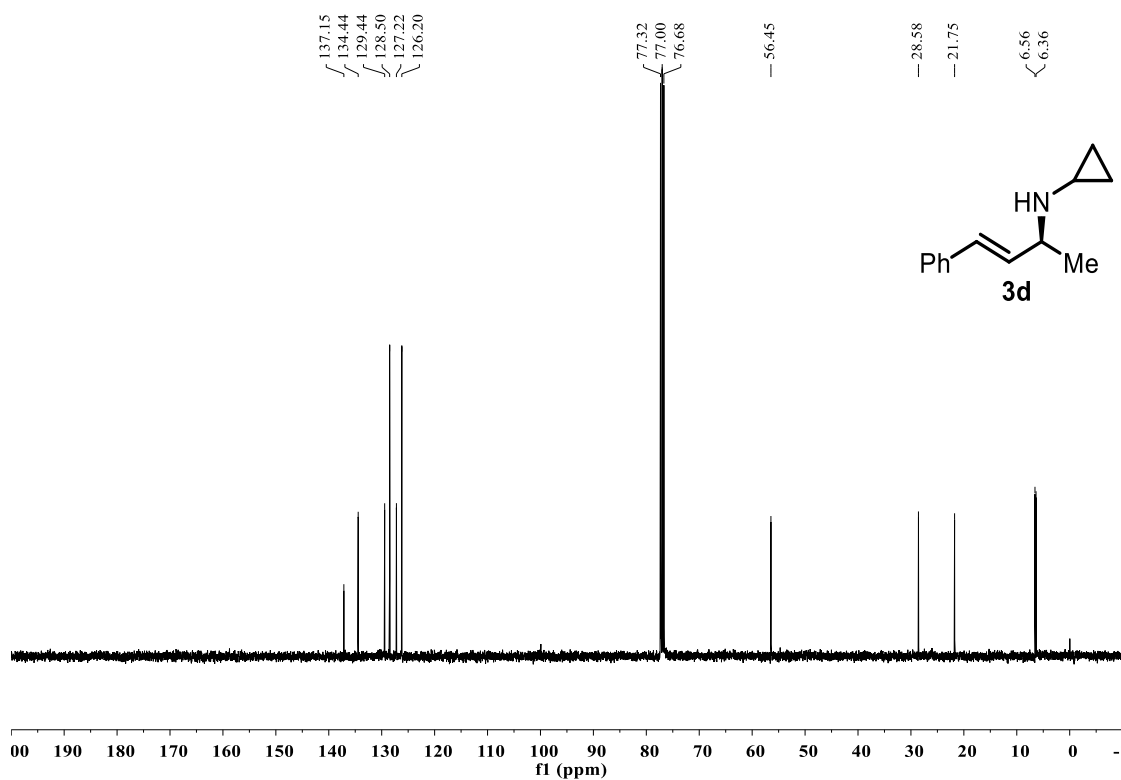

**Figure S30.** <sup>13</sup>C NMR spectra of **3d**, related to **Figure 3**.



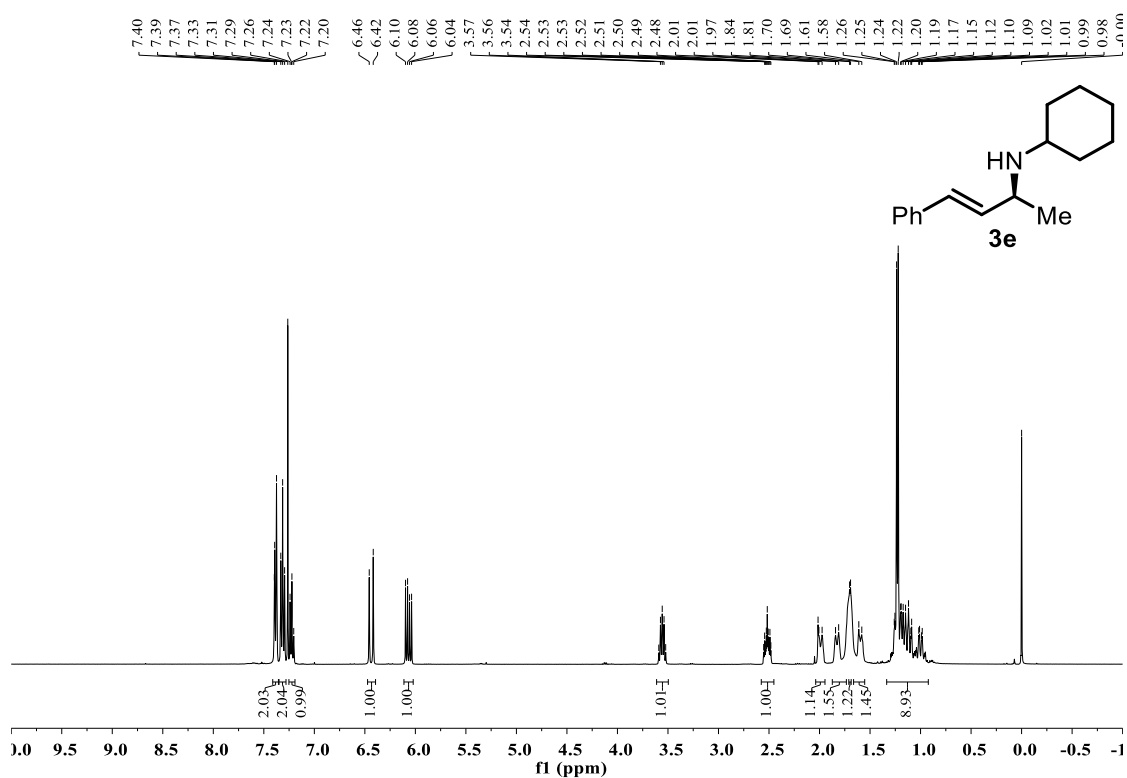

**Figure S31.** <sup>1</sup>H NMR spectra of **3e**, related to **Figure 3**.

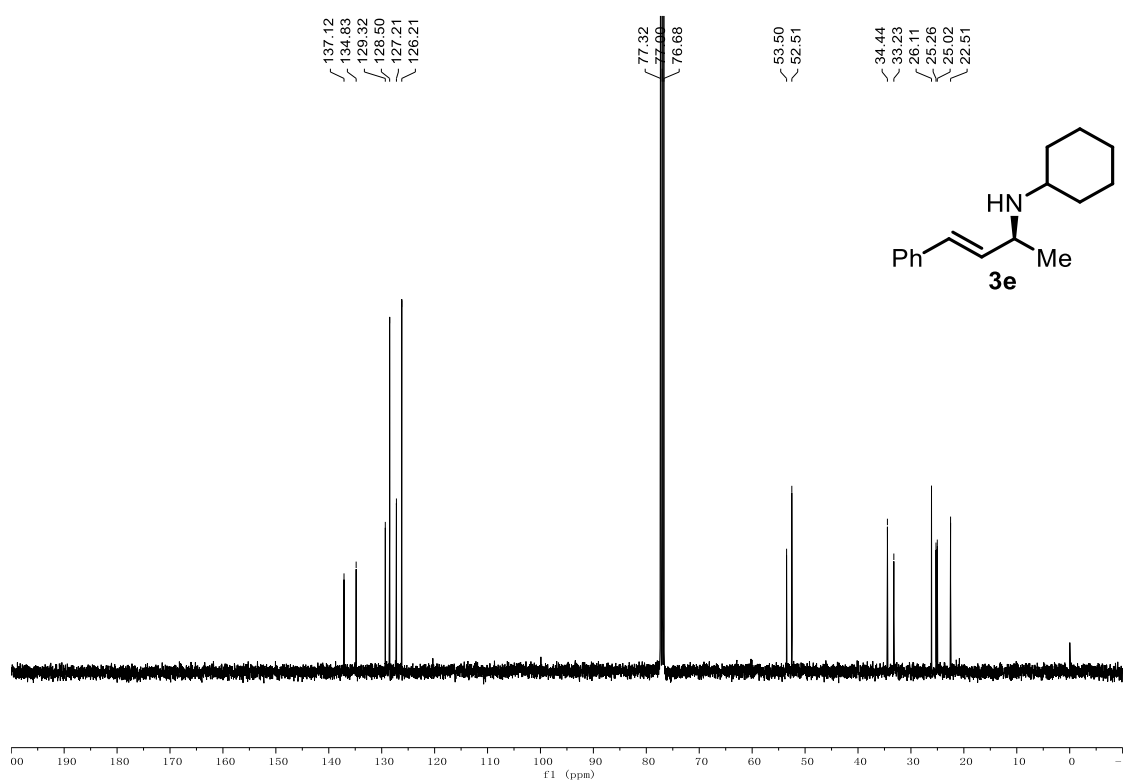

**Figure S32.** <sup>13</sup>C NMR spectra of **3e**, related to **Figure 3**.

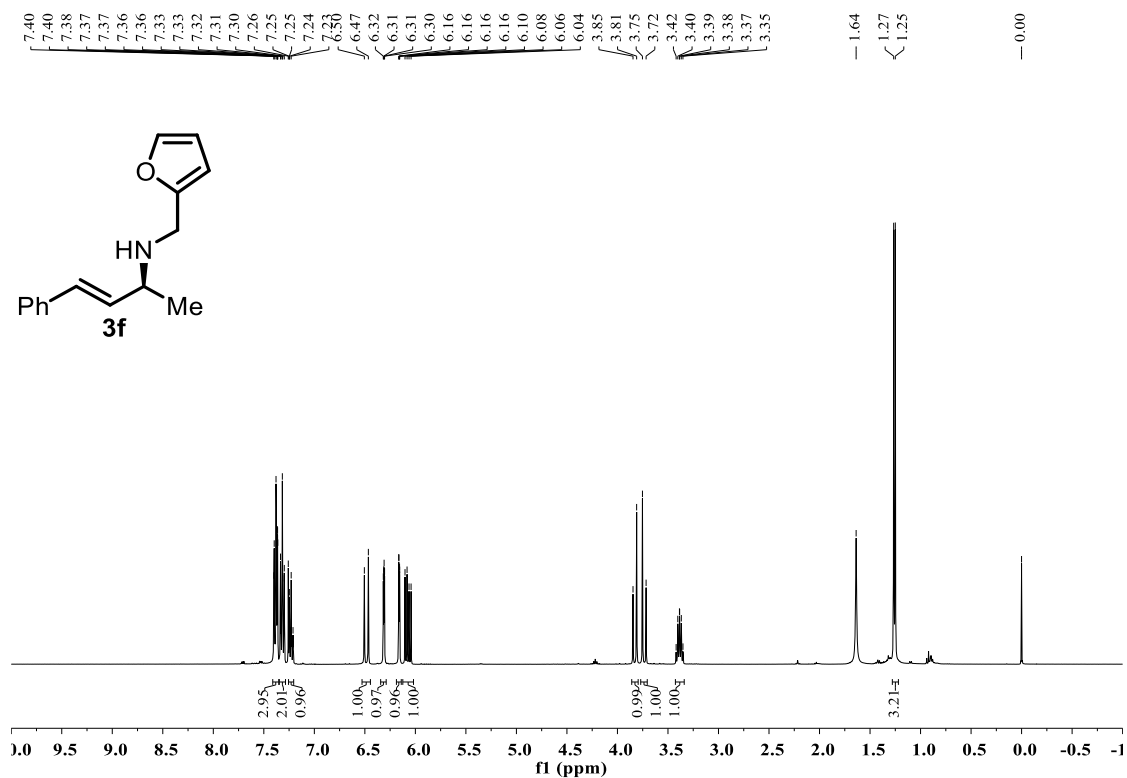

**Figure S33.** <sup>1</sup>H NMR spectra of **3f**, related to **Figure 3**.

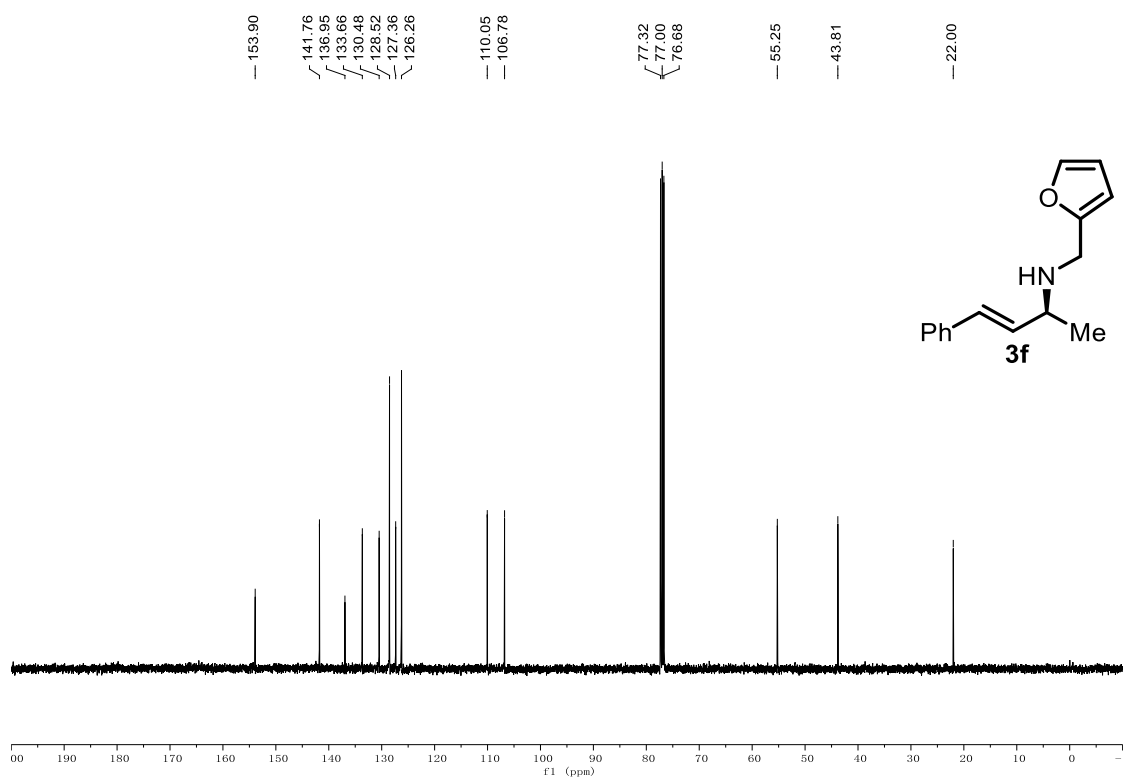

**Figure S34.** <sup>13</sup>C NMR spectra of **3f**, related to **Figure 3**.

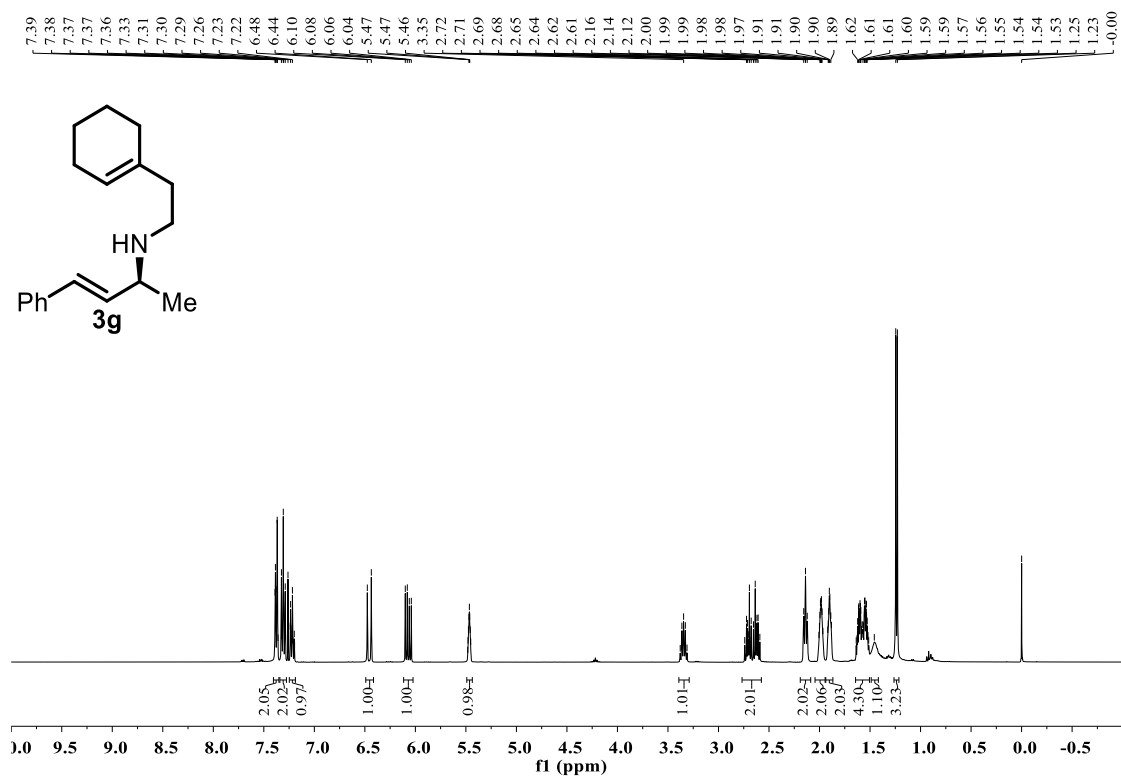

Figure S35.  $^1\text{H}$  NMR spectra of **3g**, related to Figure 3.

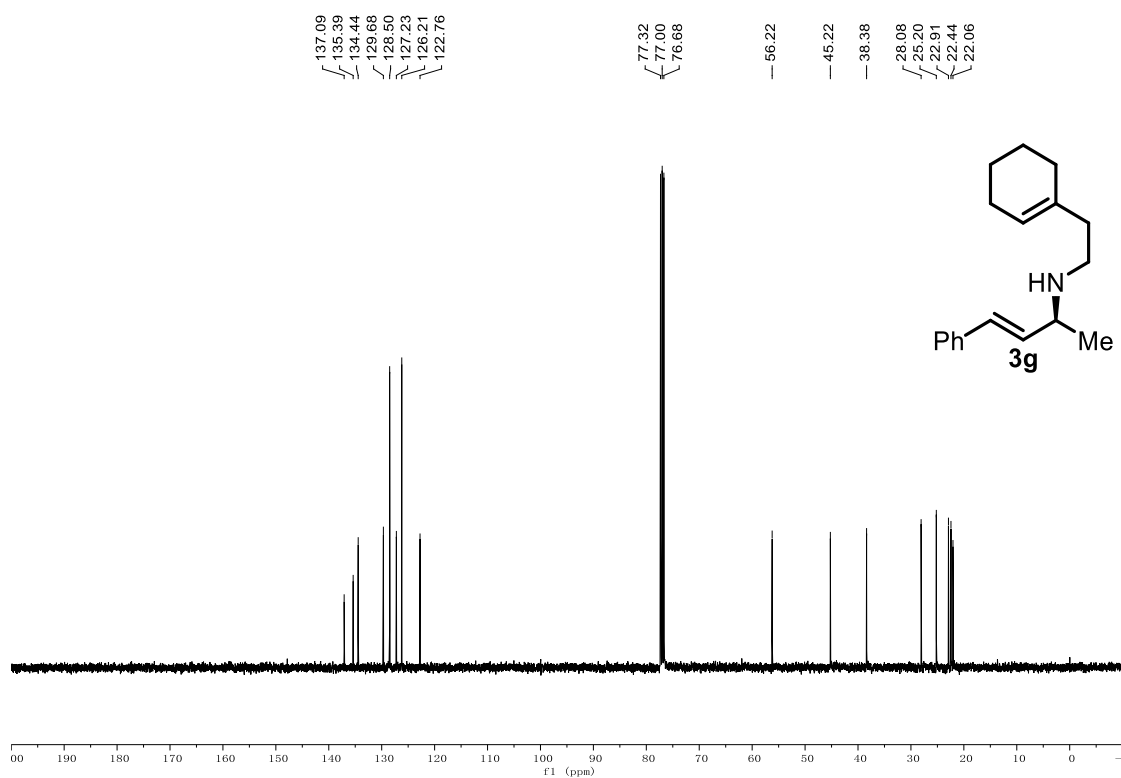

Figure S36.  $^{13}\text{C}$  NMR spectra of **3g**, related to Figure 3.

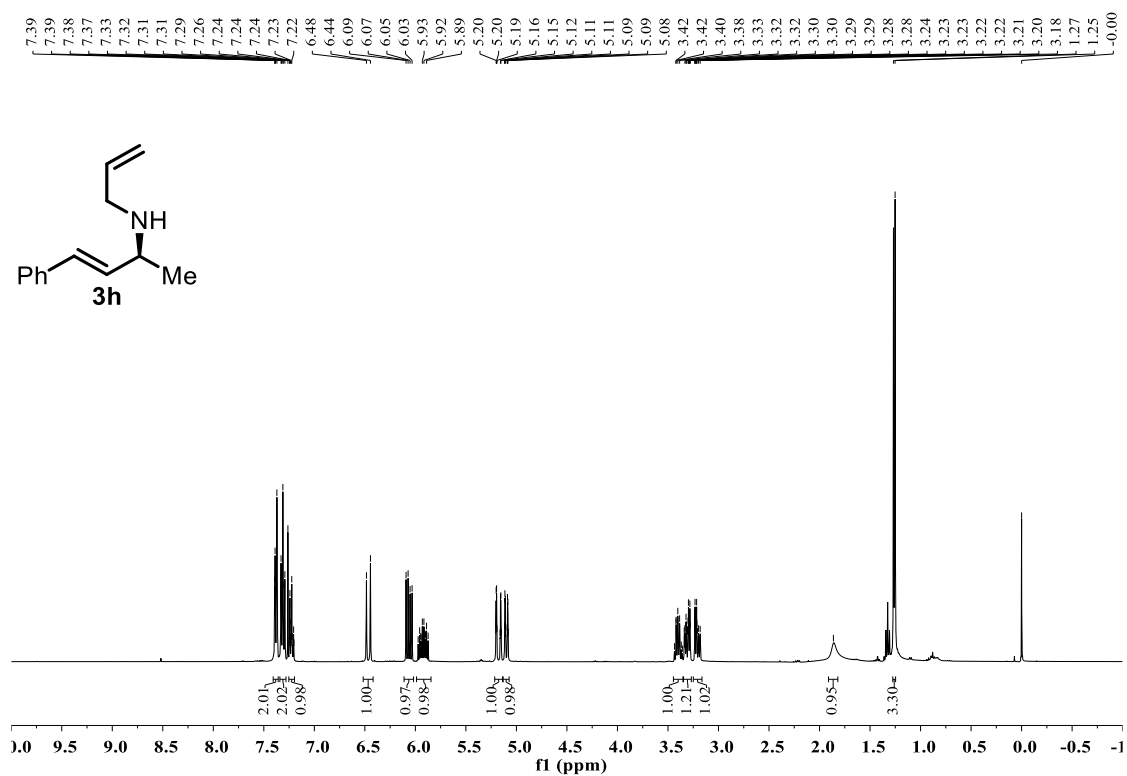

Figure S37. <sup>1</sup>H NMR spectra of **3h**, related to Figure 3.

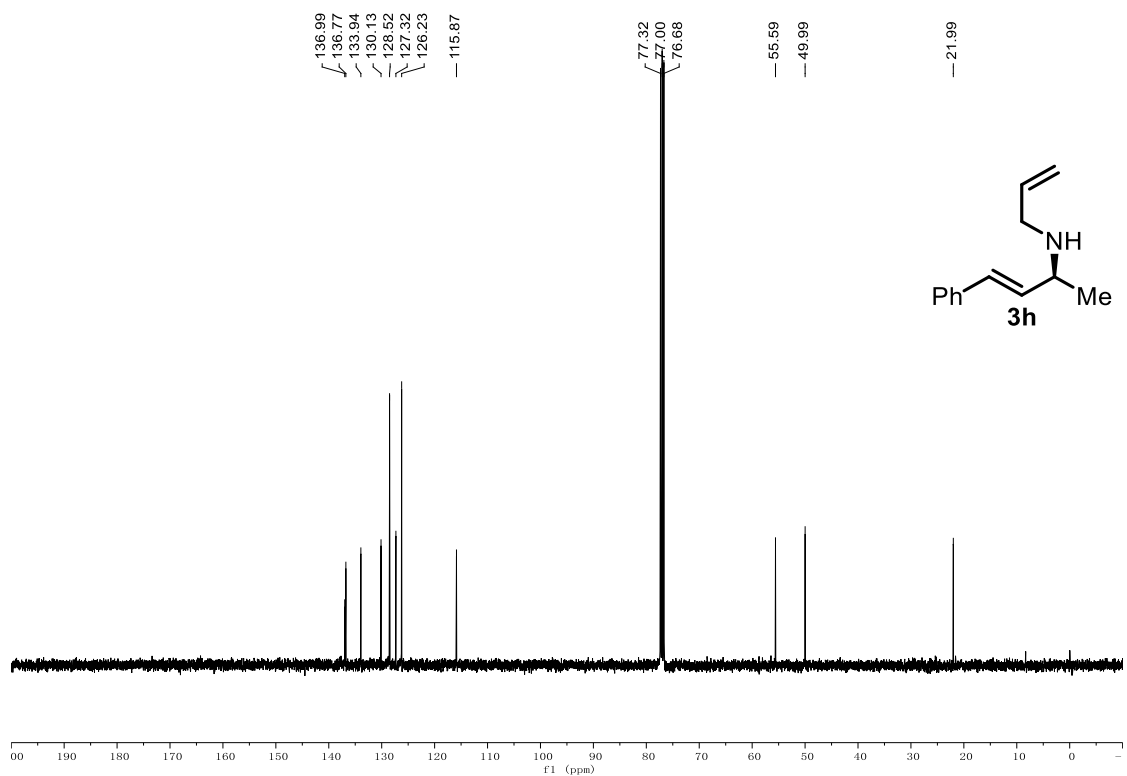

Figure S38. <sup>13</sup>C NMR spectra of **3h**, related to Figure 3.

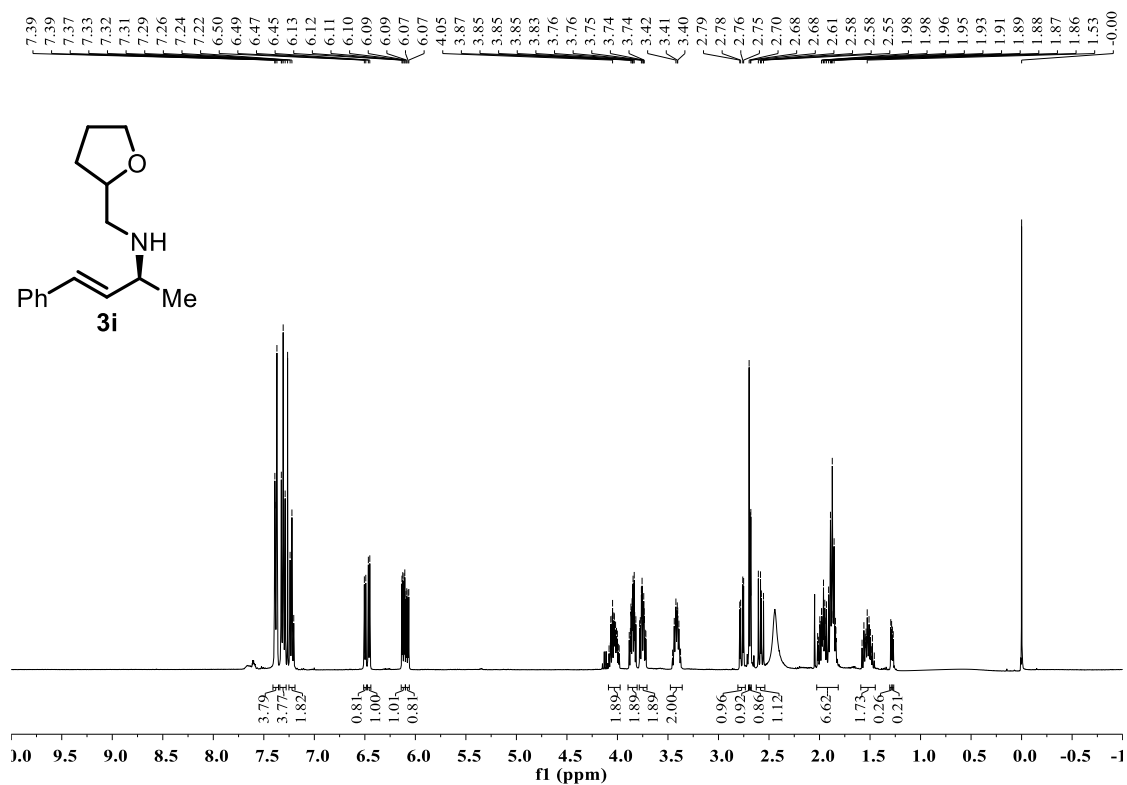

Figure S39. <sup>1</sup>H NMR spectra of **3i**, related to Figure 3.

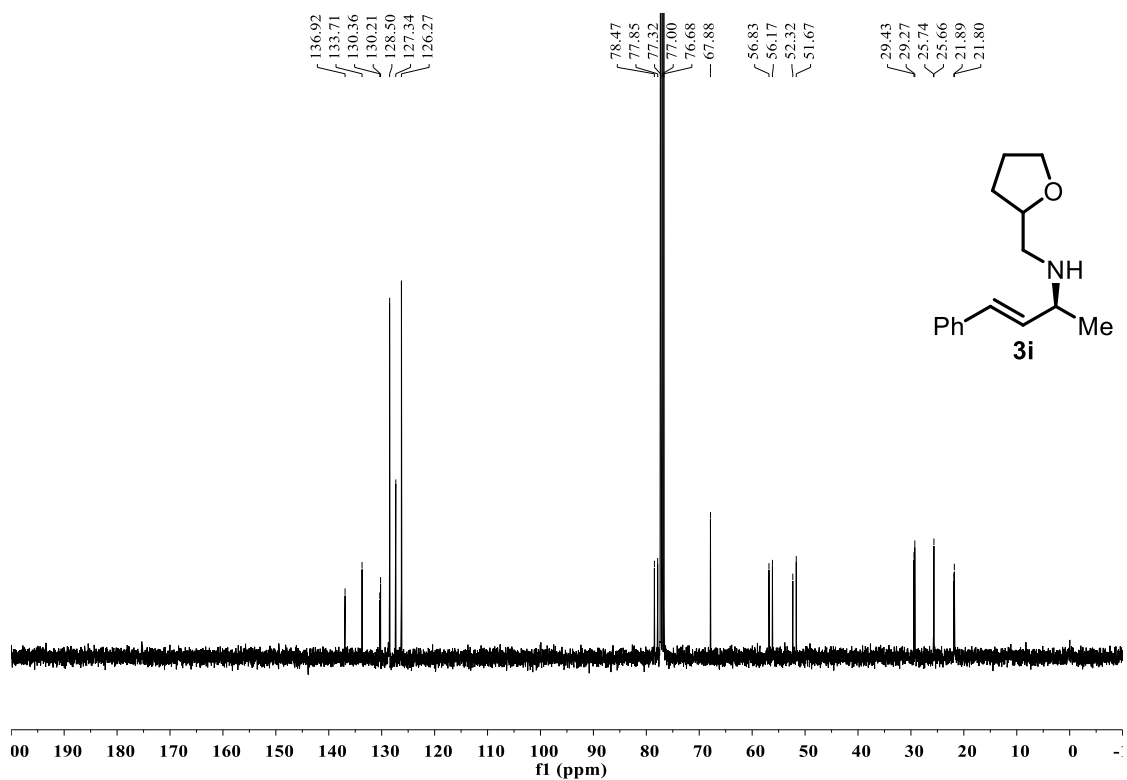

Figure S40. <sup>13</sup>C NMR spectra of **3i**, related to Figure 3.

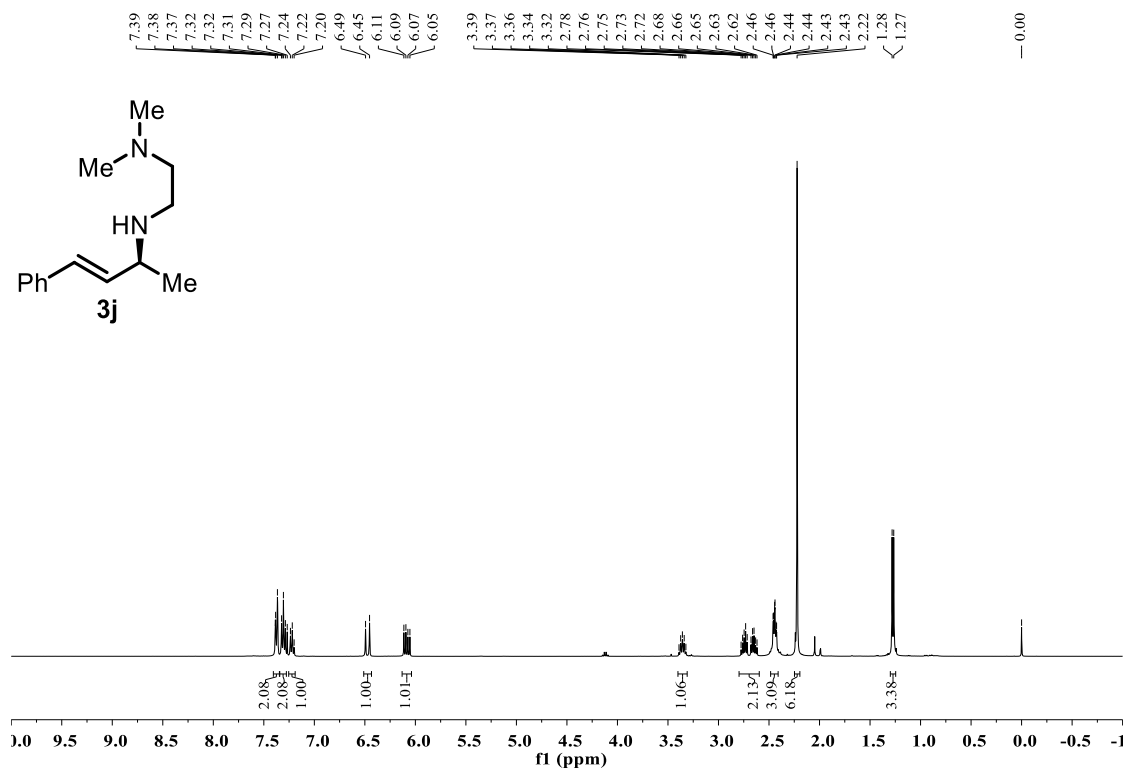

Figure S41. <sup>1</sup>H NMR spectra of **3j**, related to Figure 3.

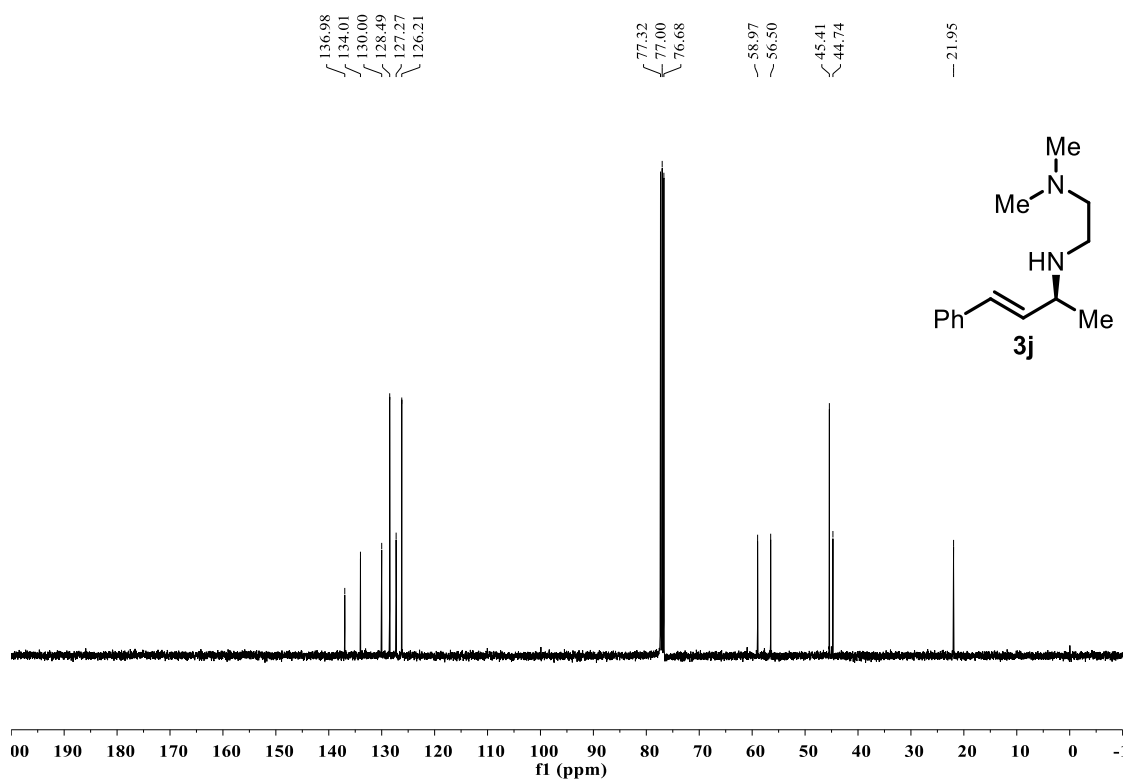

Figure S42. <sup>13</sup>C NMR spectra of **3j**, related to Figure 3.

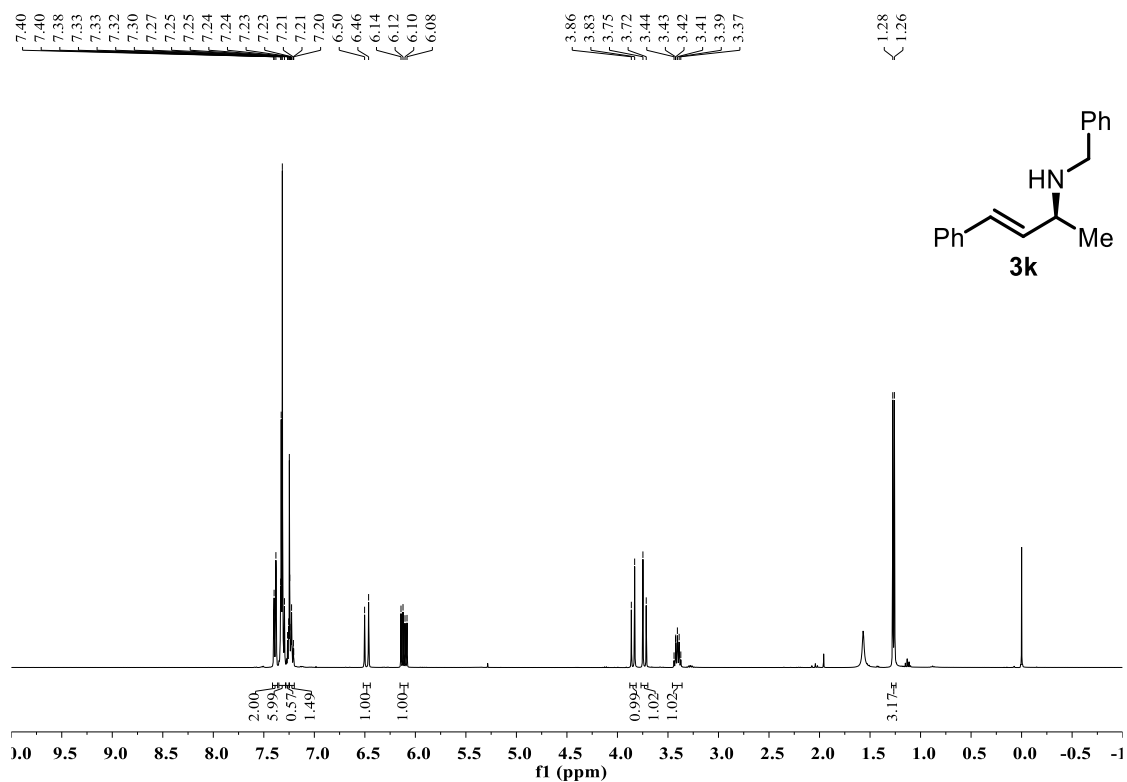

Figure S43. <sup>1</sup>H NMR spectra of **3k**, related to Figure 3.

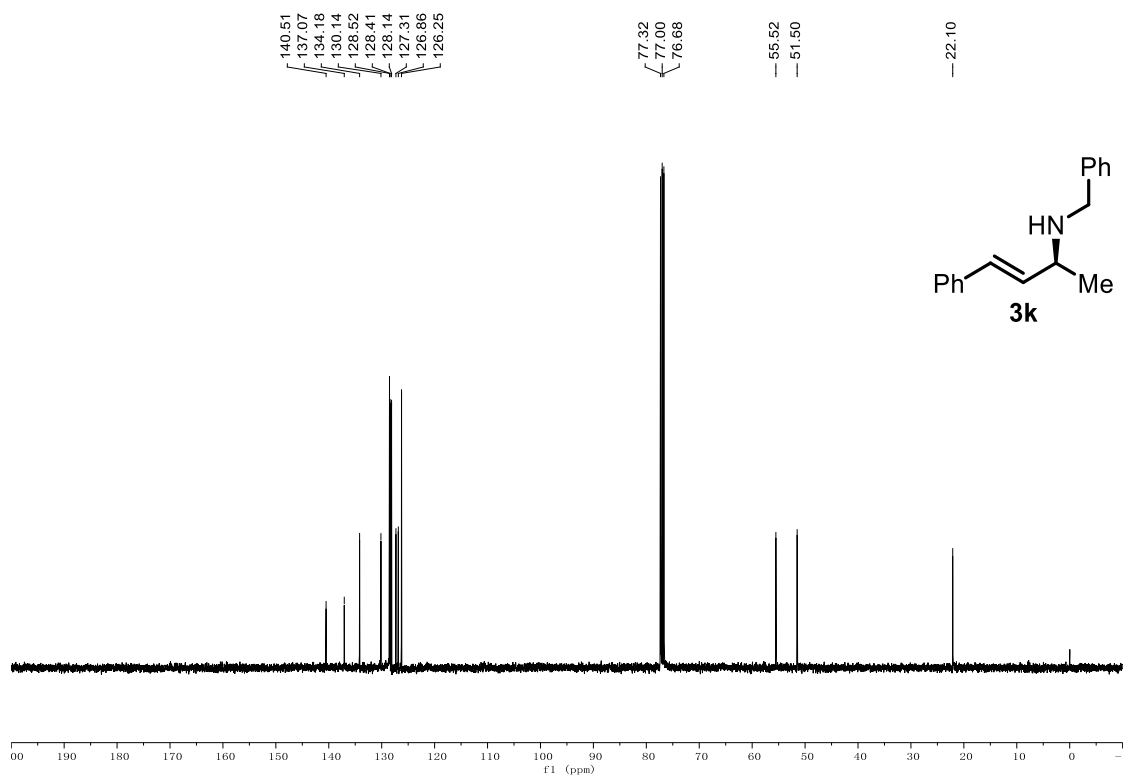

Figure S44. <sup>13</sup>C NMR spectra of **3k**, related to Figure 3.

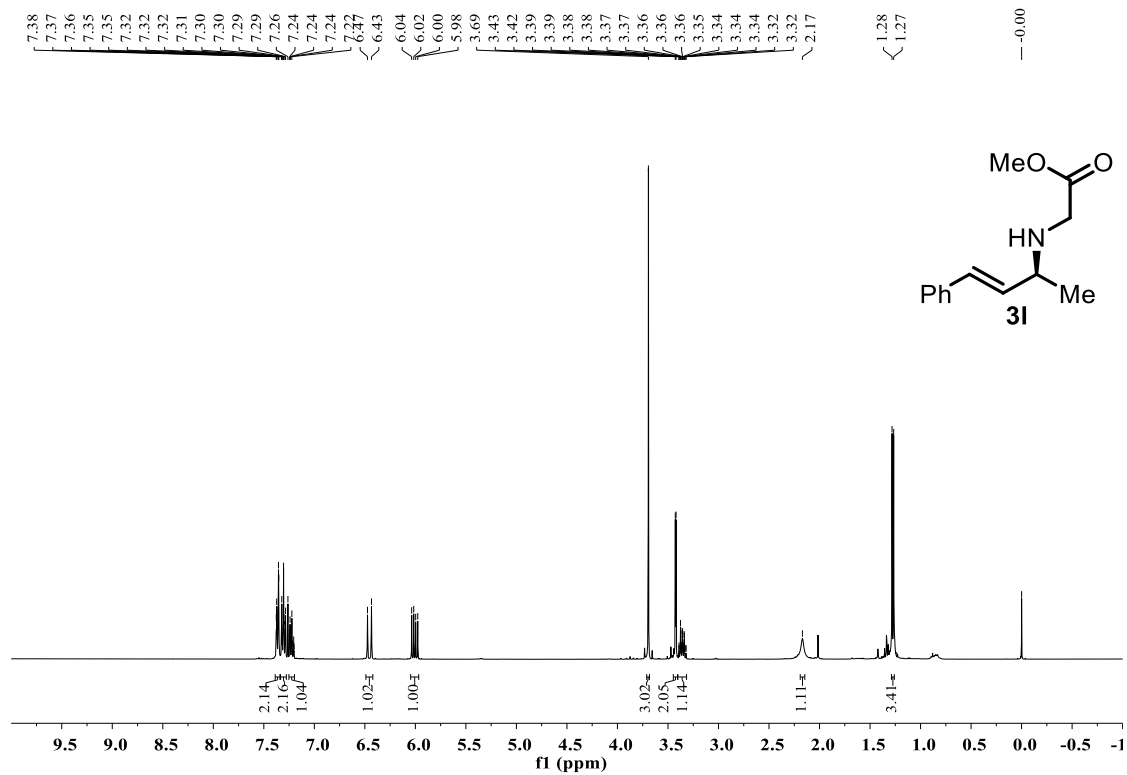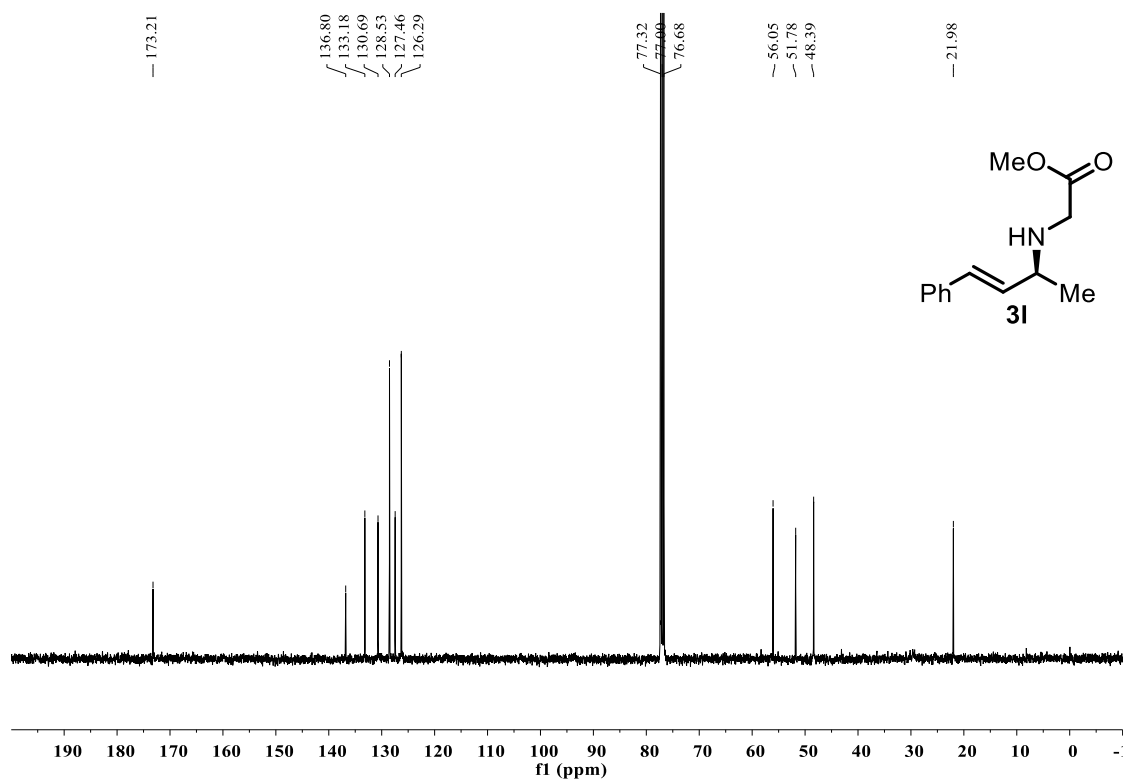



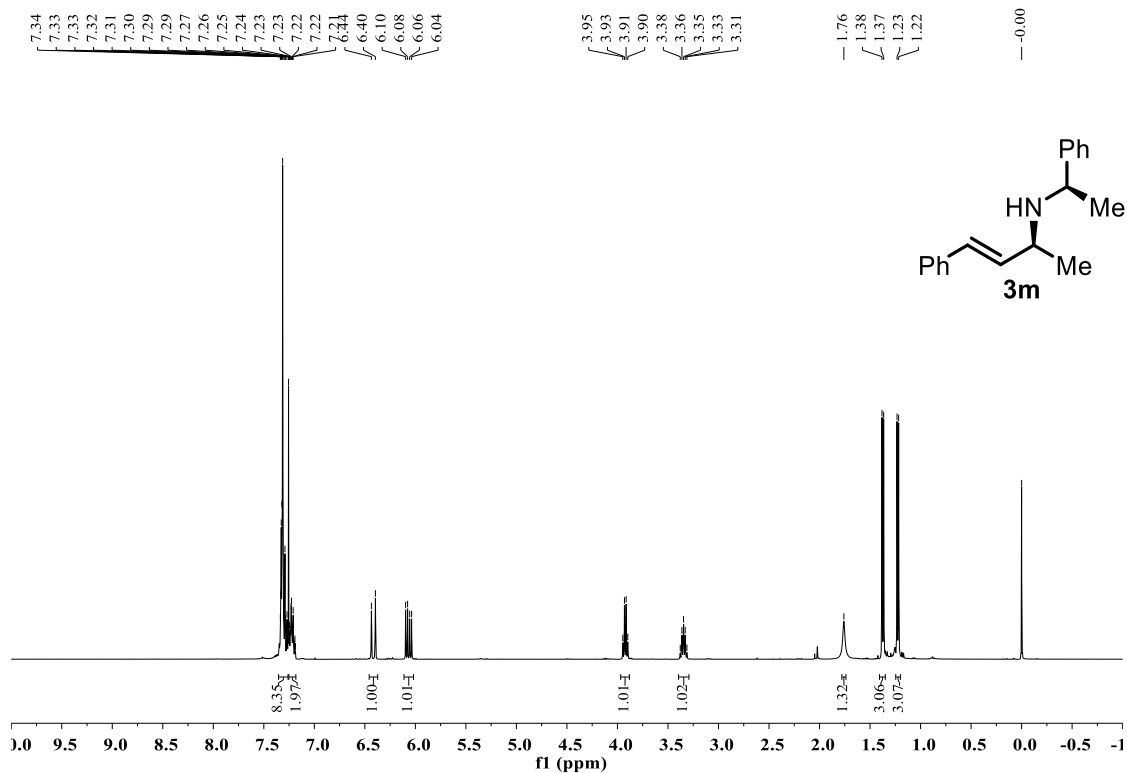

Figure S47. <sup>1</sup>H NMR spectra of **3m**, related to Figure 3.

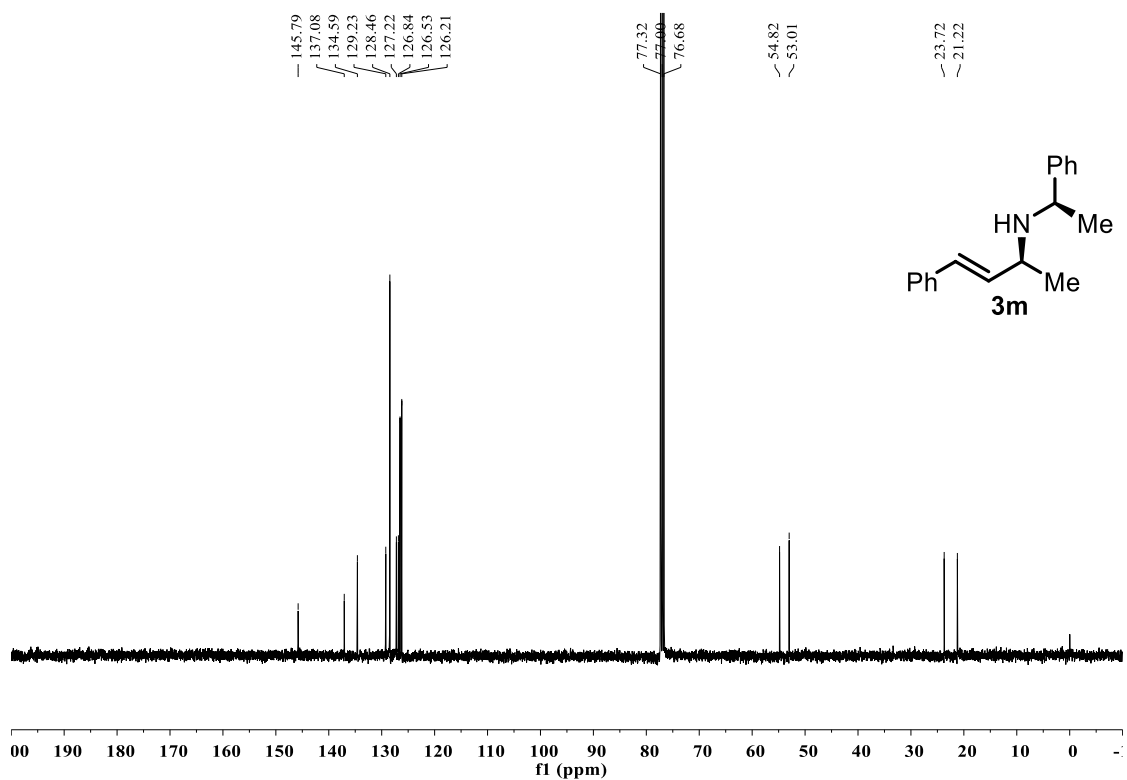

Figure S48. <sup>13</sup>C NMR spectra of **3m**, related to Figure 3.

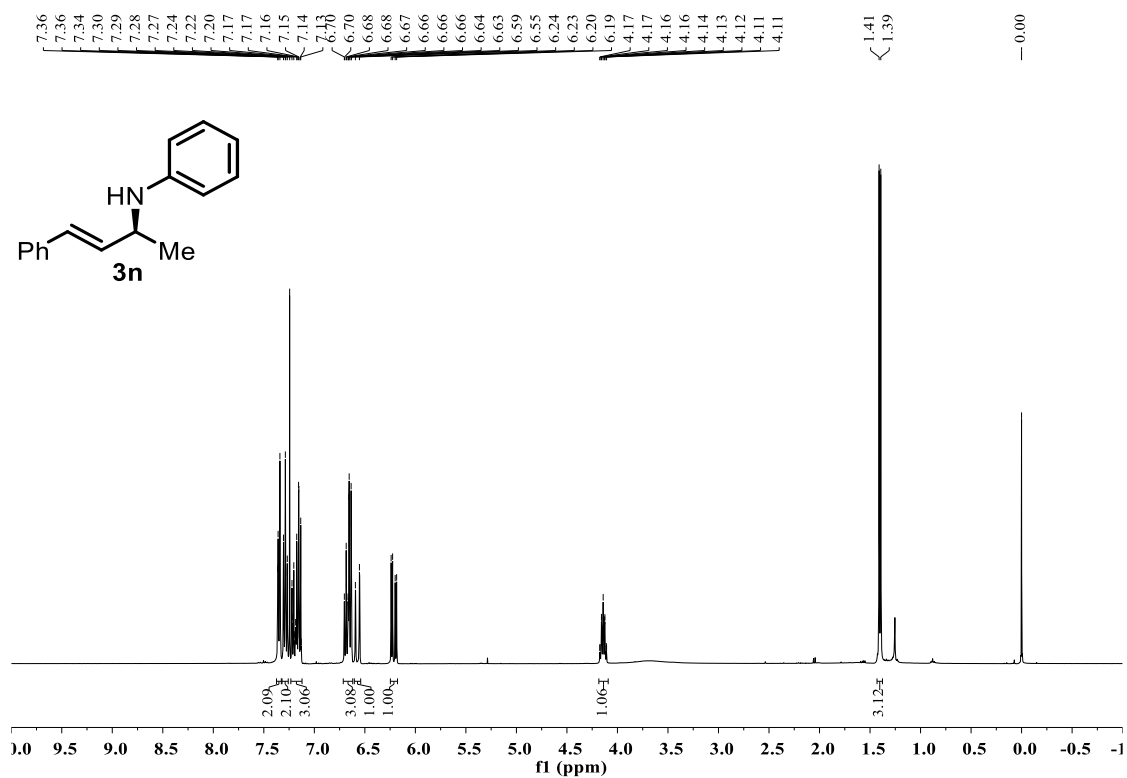

**Figure S49.** <sup>1</sup>H NMR spectra of **3n**, related to **Figure 3**.

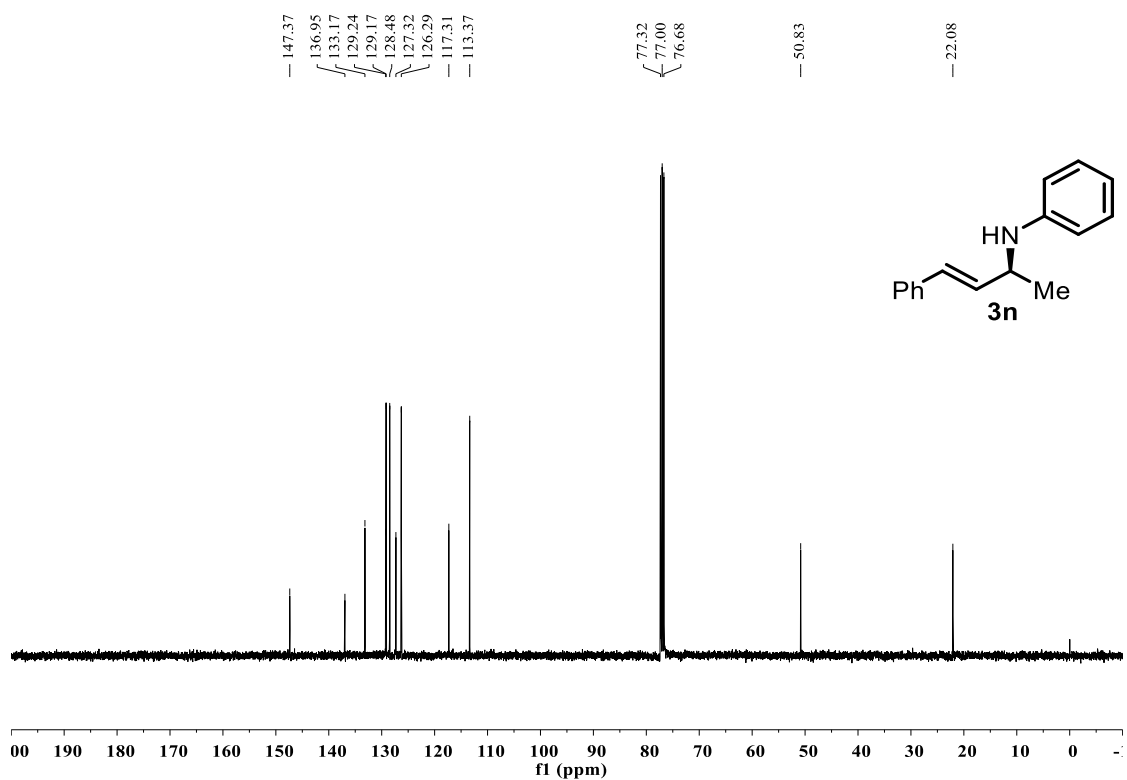

**Figure S50.** <sup>13</sup>C NMR spectra of **3n**, related to **Figure 3**.

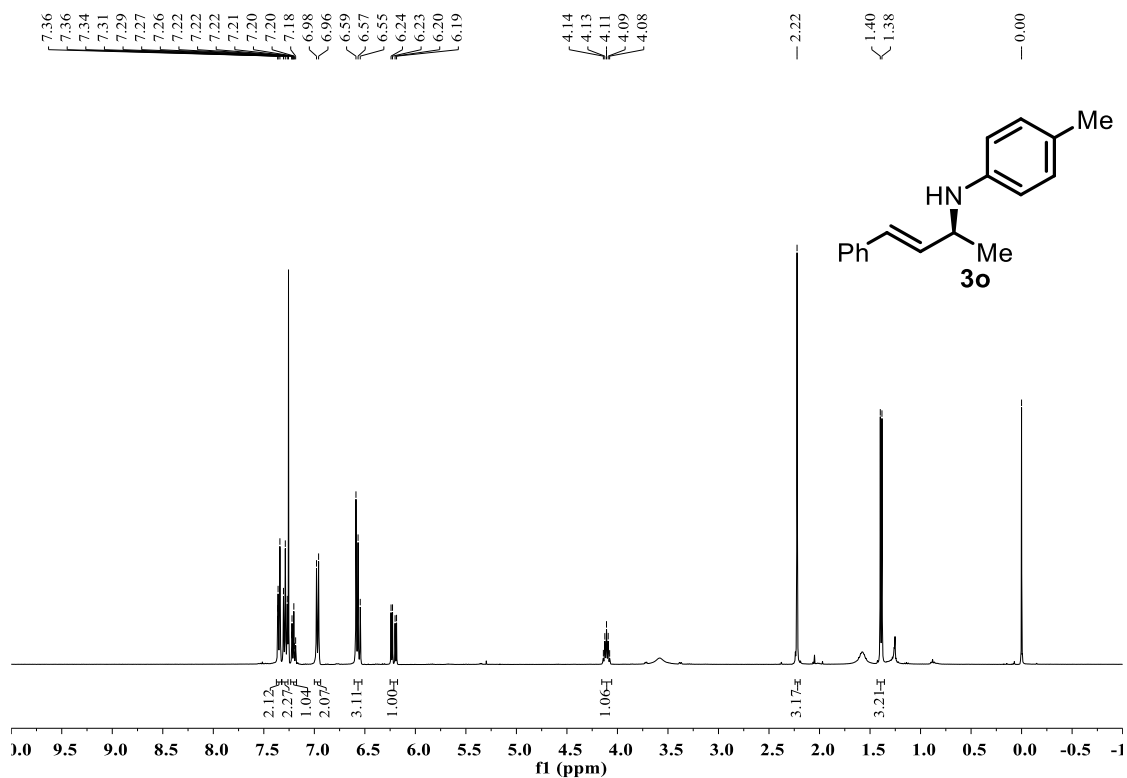

Figure S51. <sup>1</sup>H NMR spectra of **3o**, related to Figure 3.

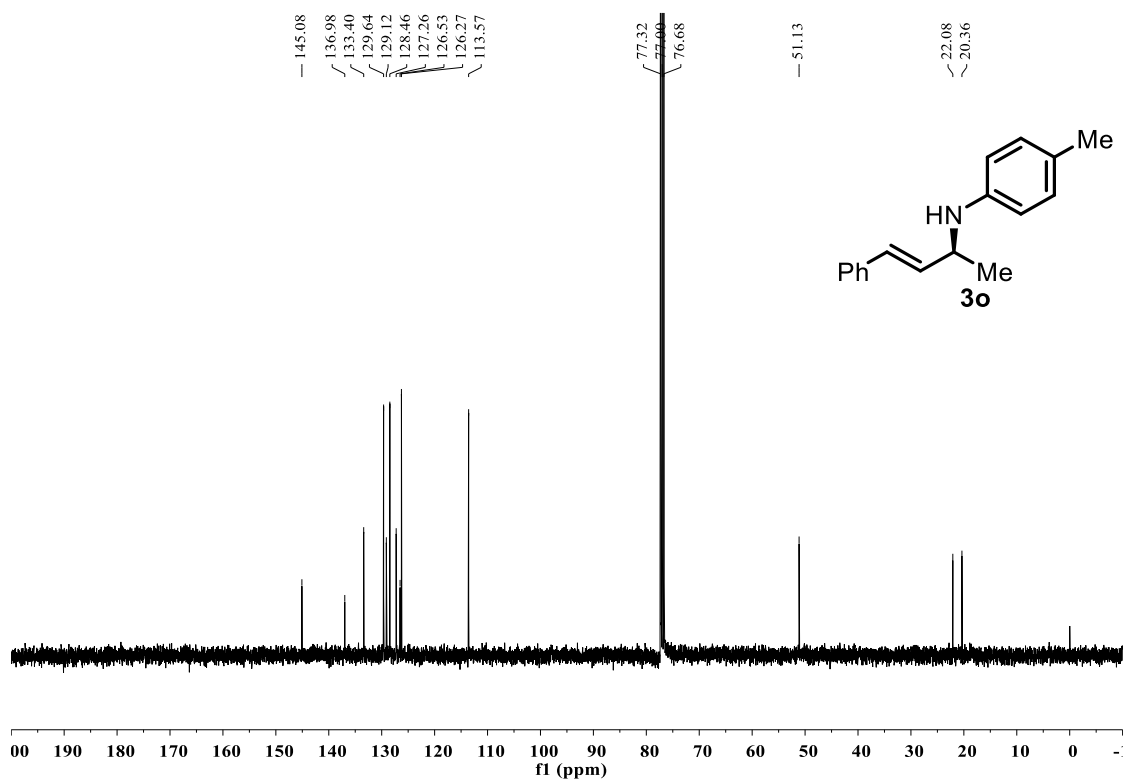

Figure S52. <sup>13</sup>C NMR spectra of **3o**, related to Figure 3.

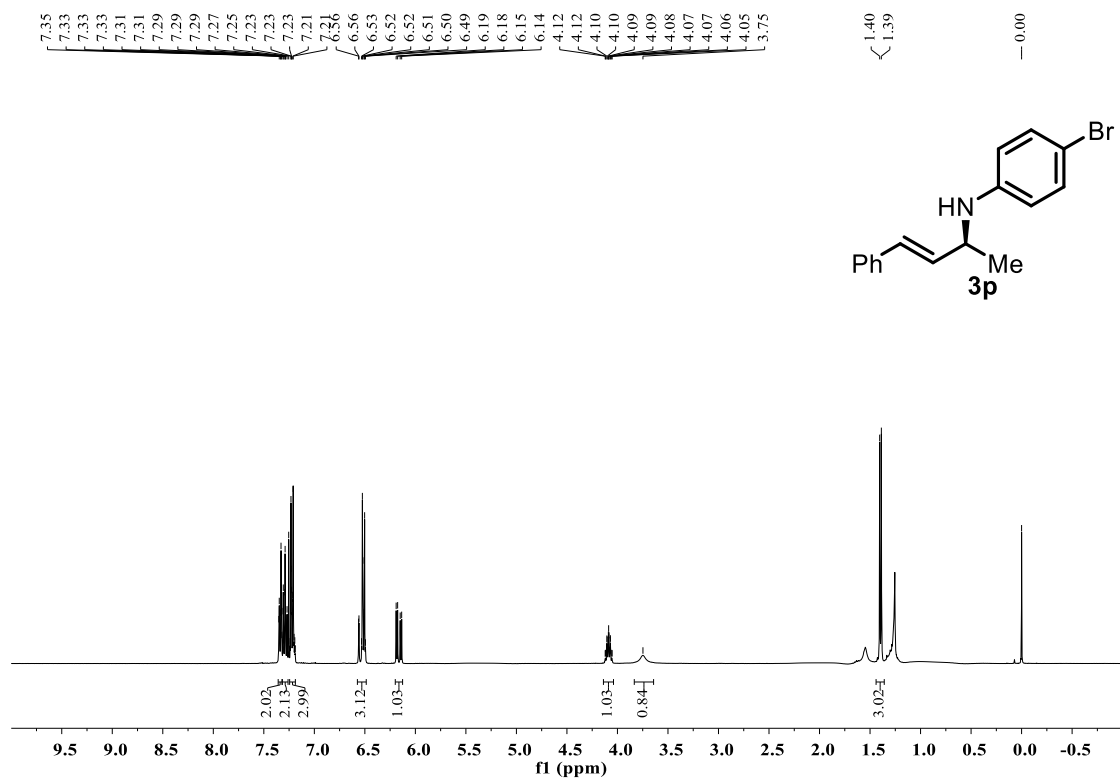

**Figure S53.** <sup>1</sup>H NMR spectra of **3p**, related to **Figure 3**.

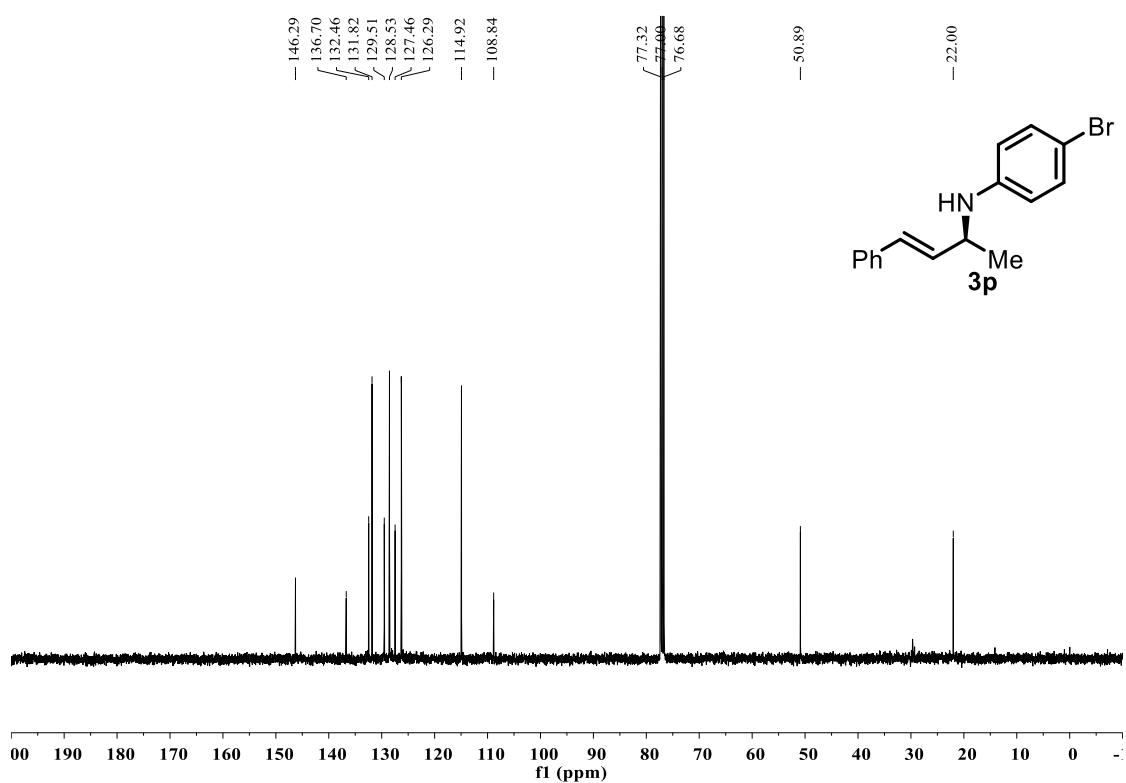

**Figure S54.** <sup>13</sup>C NMR spectra of **3p**, related to **Figure 3**.

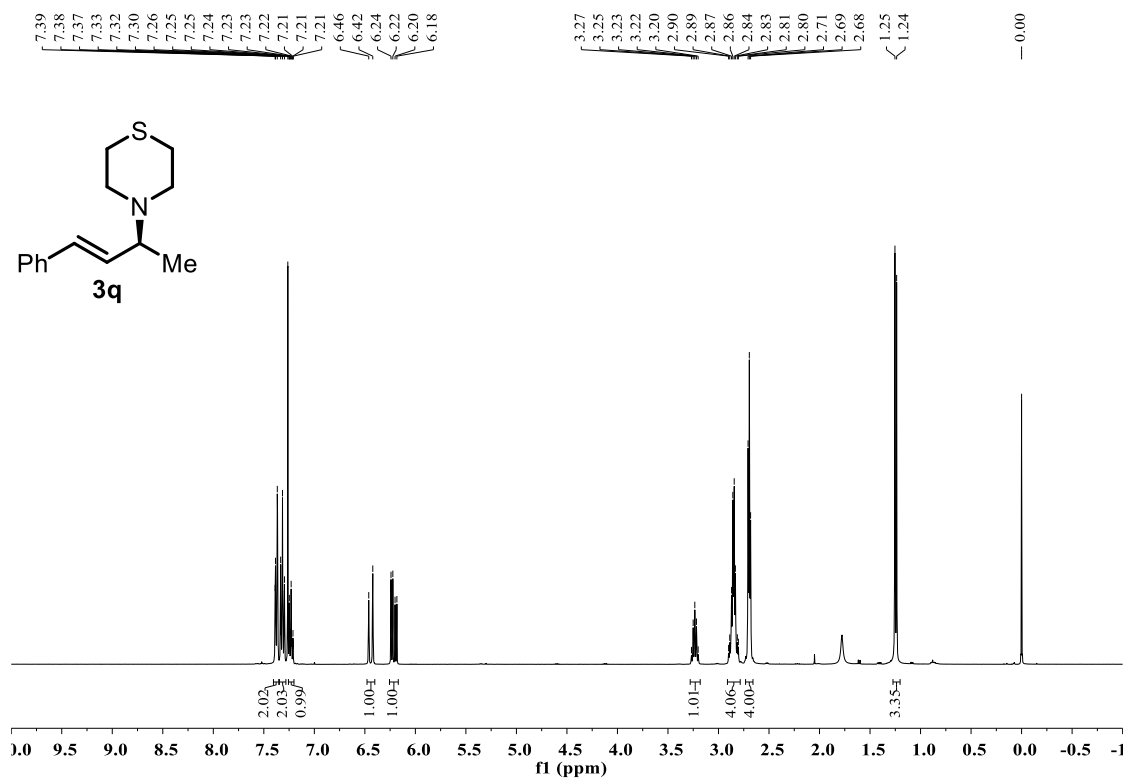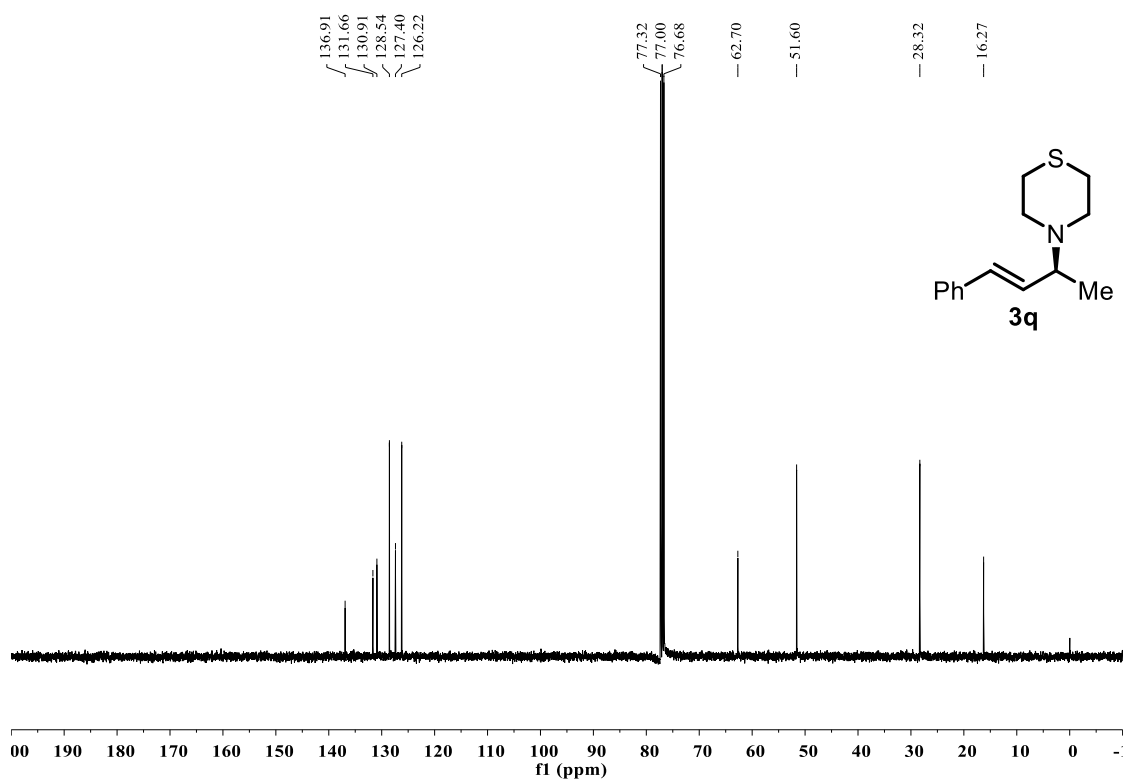

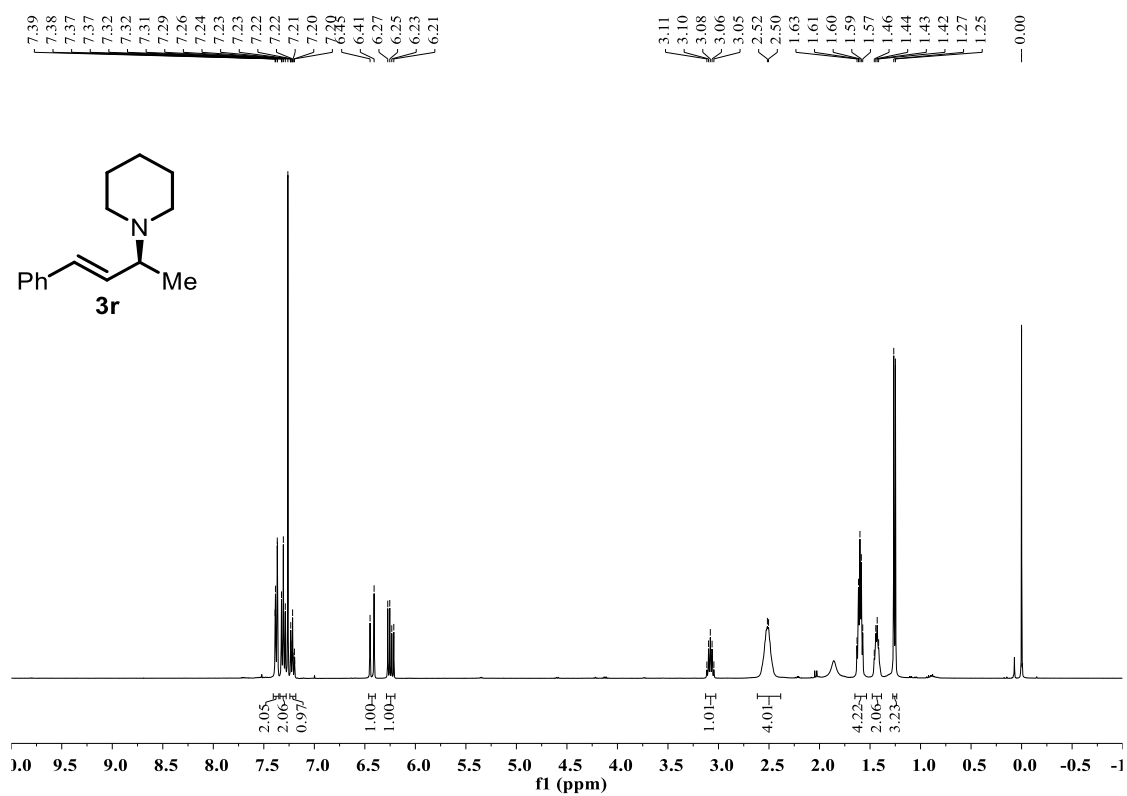

Figure S57. <sup>1</sup>H NMR spectra of **3r**, related to Figure 3.

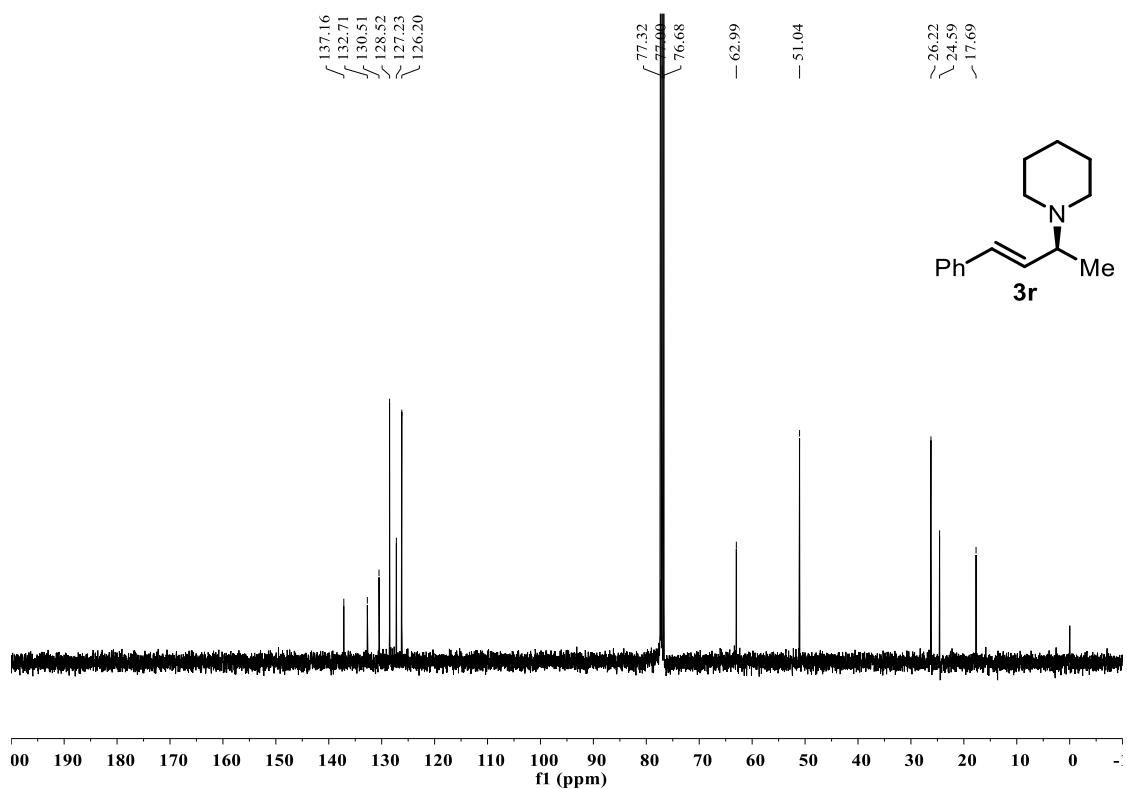

Figure S58. <sup>13</sup>C NMR spectra of **3r**, related to Figure 3.

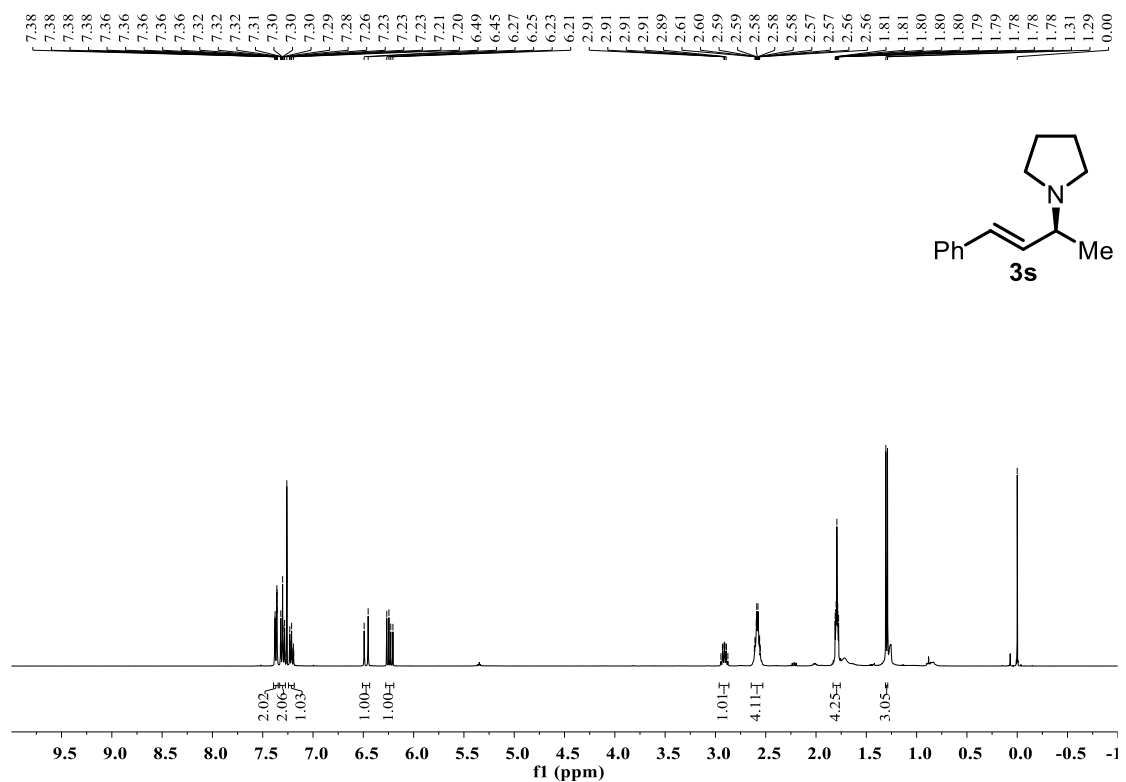

Figure S59. <sup>1</sup>H NMR spectra of **3s**, related to Figure 3.

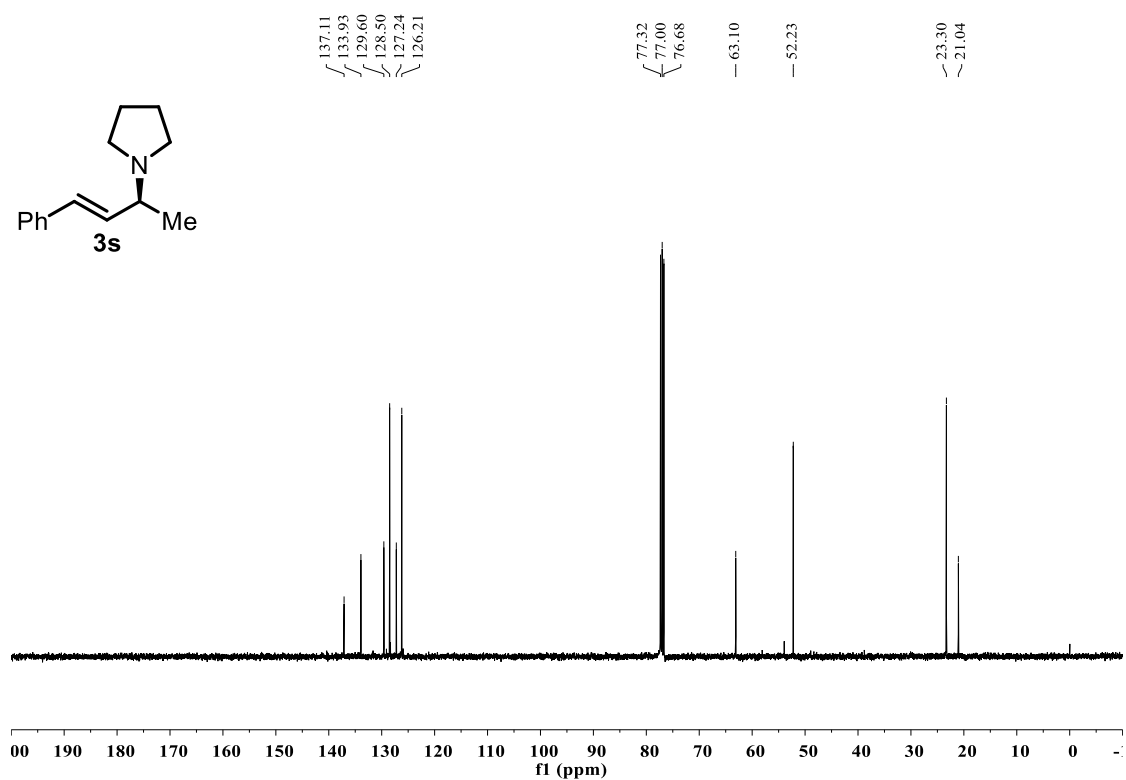

Figure S60. <sup>13</sup>C NMR spectra of **3s**, related to Figure 3.

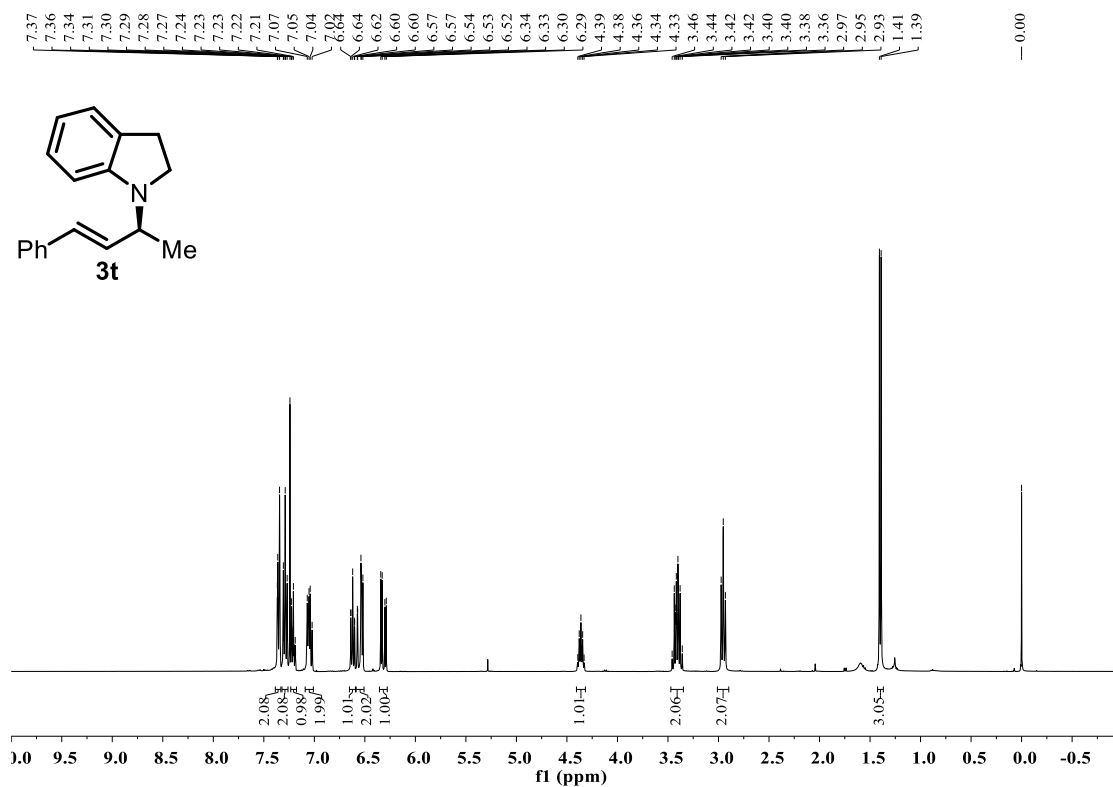

Figure S61. <sup>1</sup>H NMR spectra of **3t**, related to Figure 3.

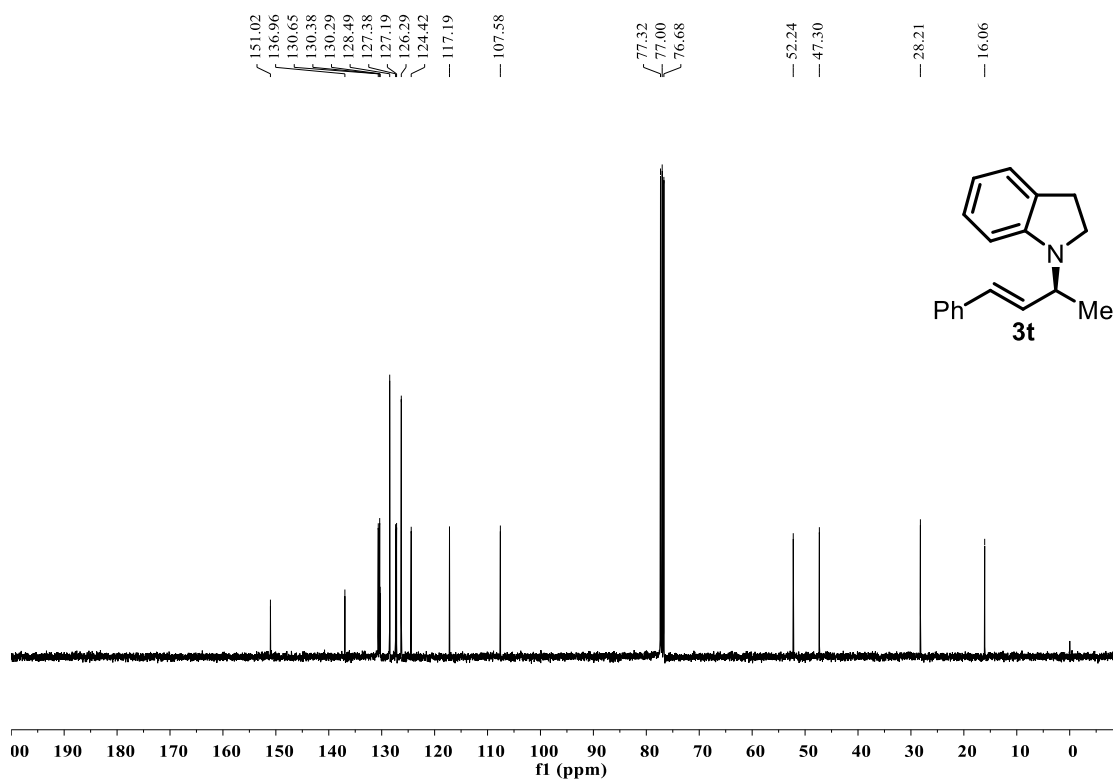

Figure S62. <sup>13</sup>C NMR spectra of **3t**, related to Figure 3.



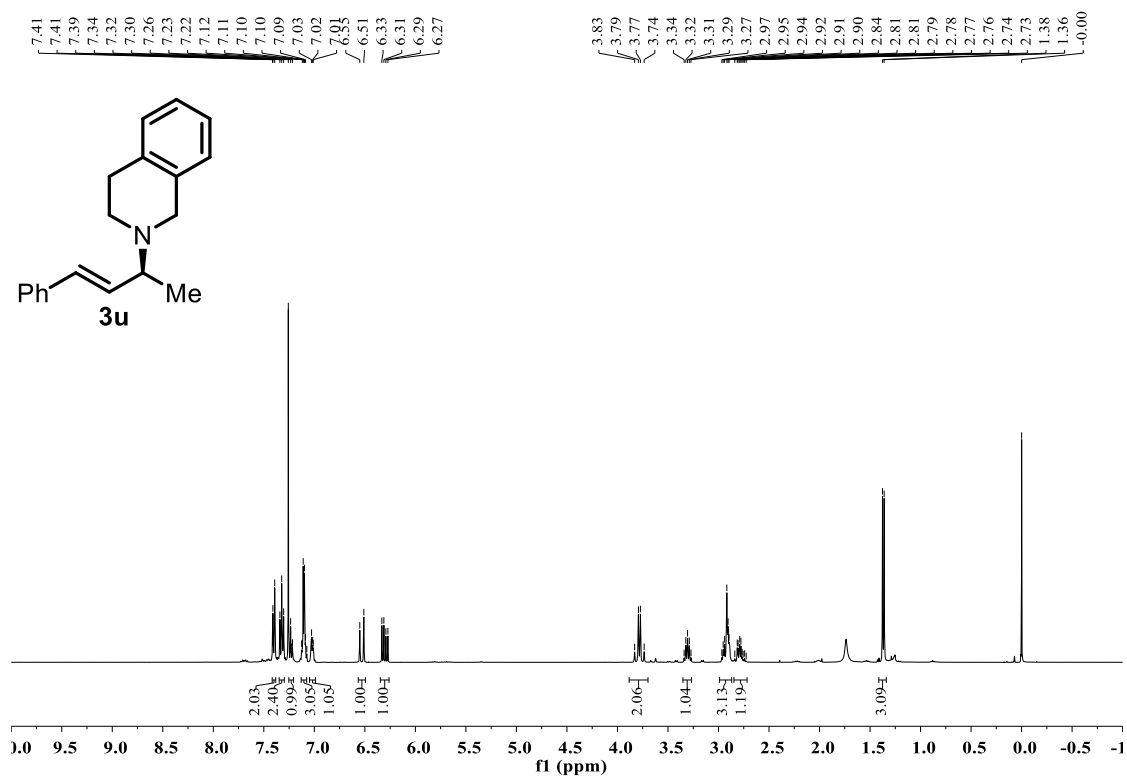

**Figure S63.** <sup>1</sup>H NMR spectra of **3u**, related to **Figure 3**.

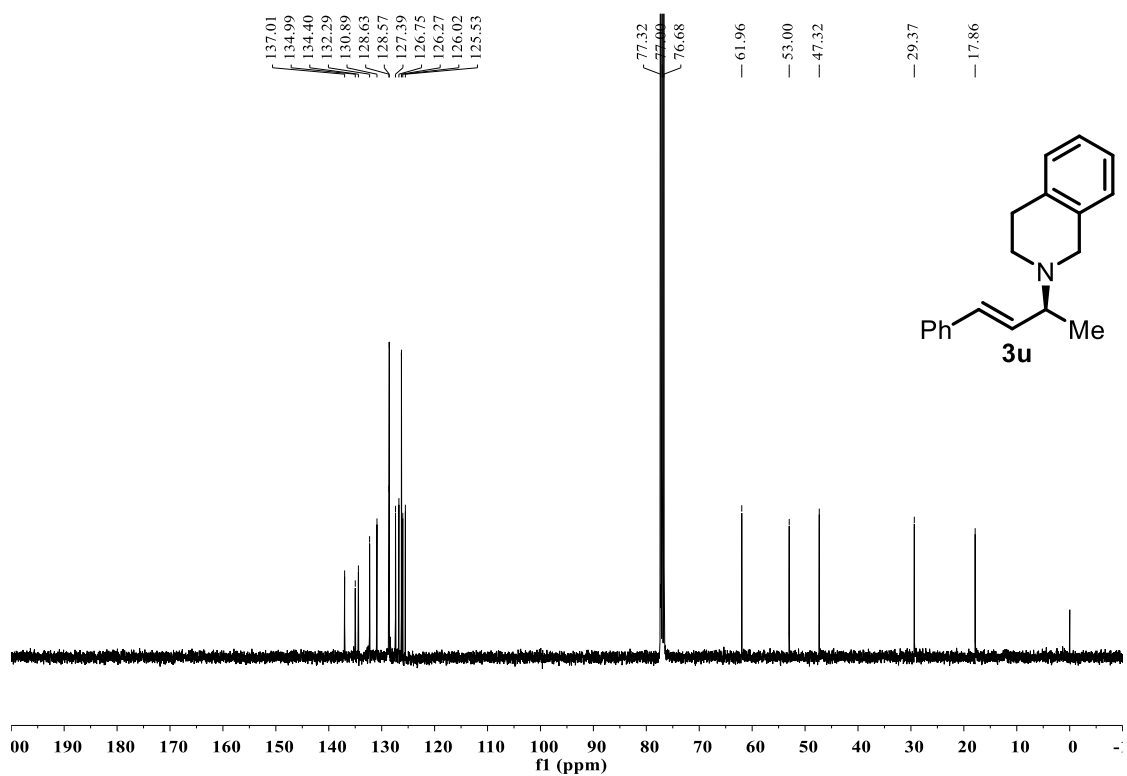

**Figure S64.** <sup>13</sup>C NMR spectra of **3u**, related to **Figure 3**.

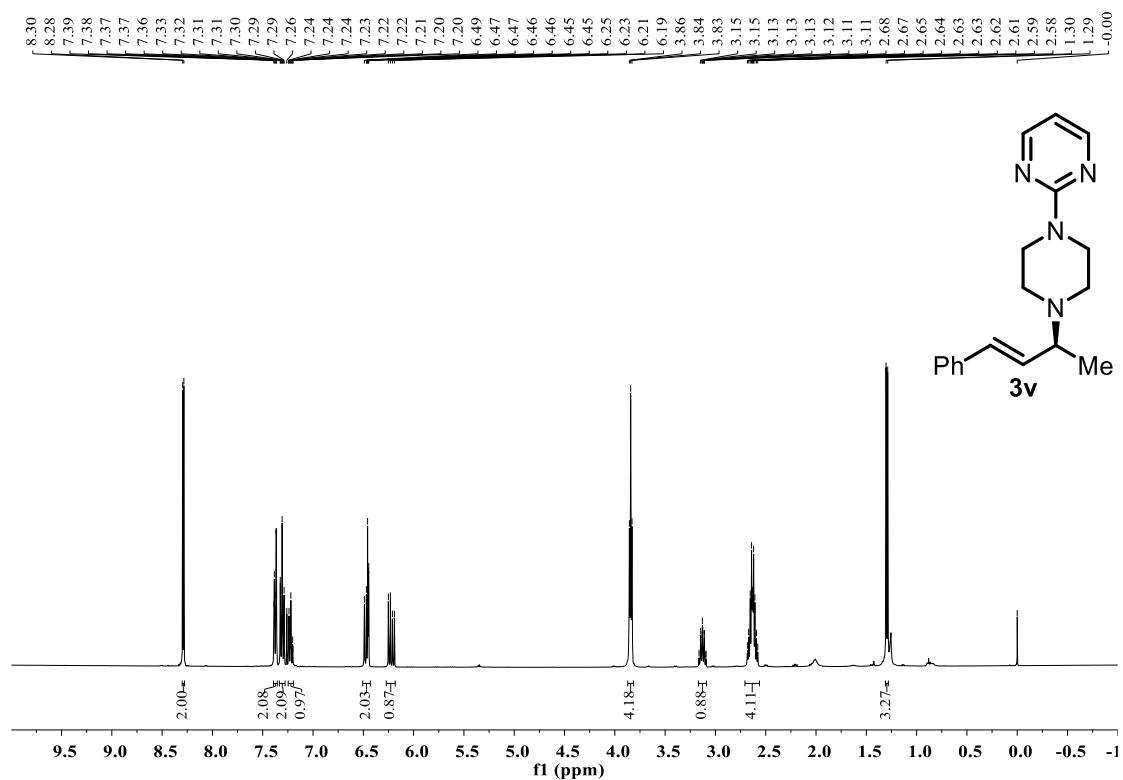

Figure S65. <sup>1</sup>H NMR spectra of **3v**, related to Figure 3.

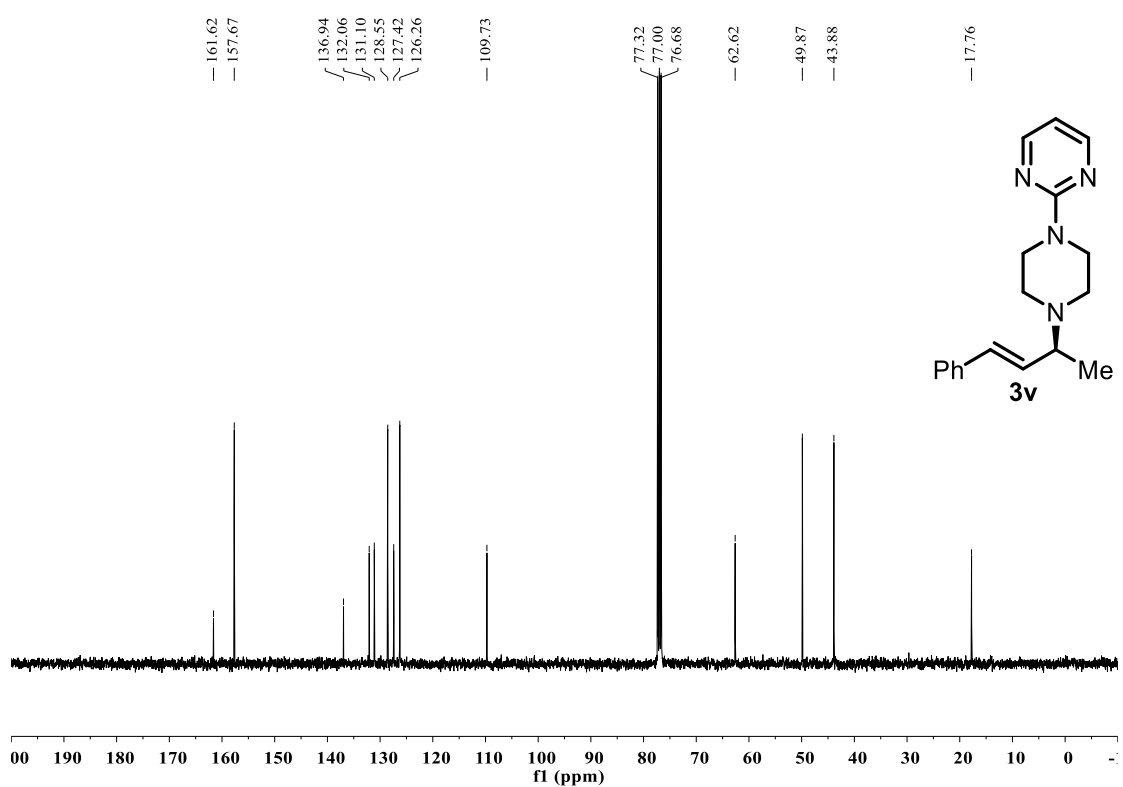

Figure S66. <sup>13</sup>C NMR spectra of **3v**, related to Figure 3.

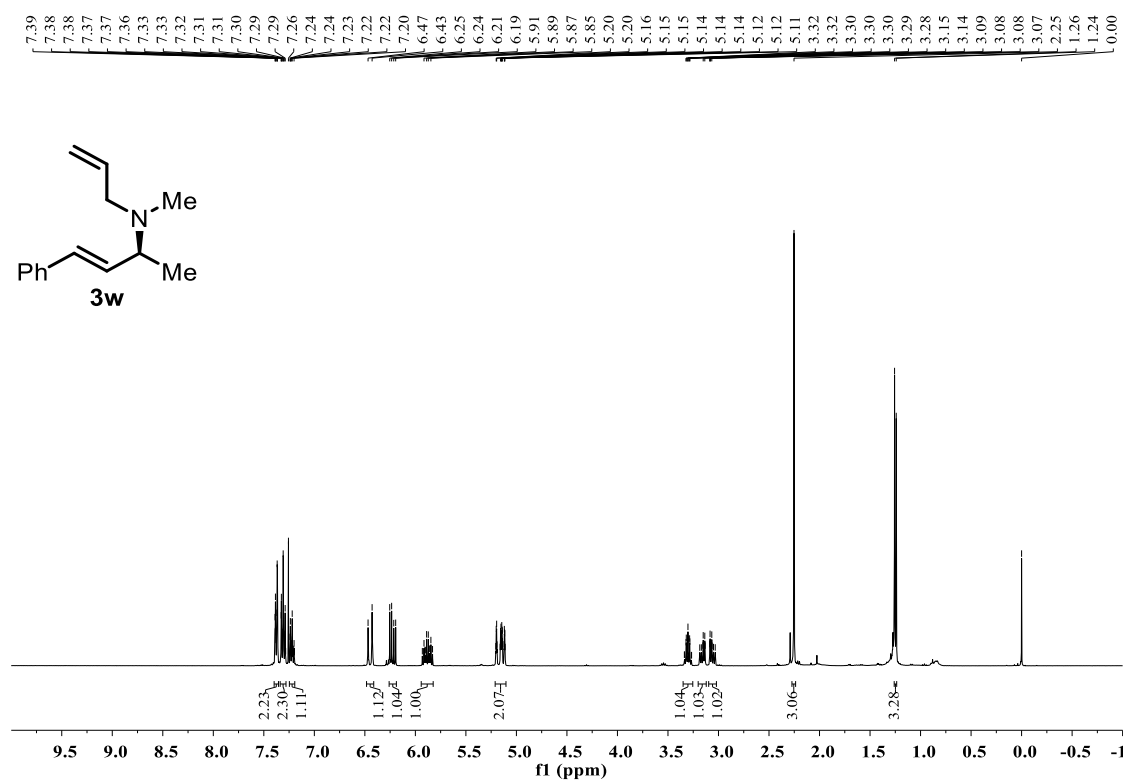

**Figure S67.** <sup>1</sup>H NMR spectra of **3w**, related to **Figure 3**.

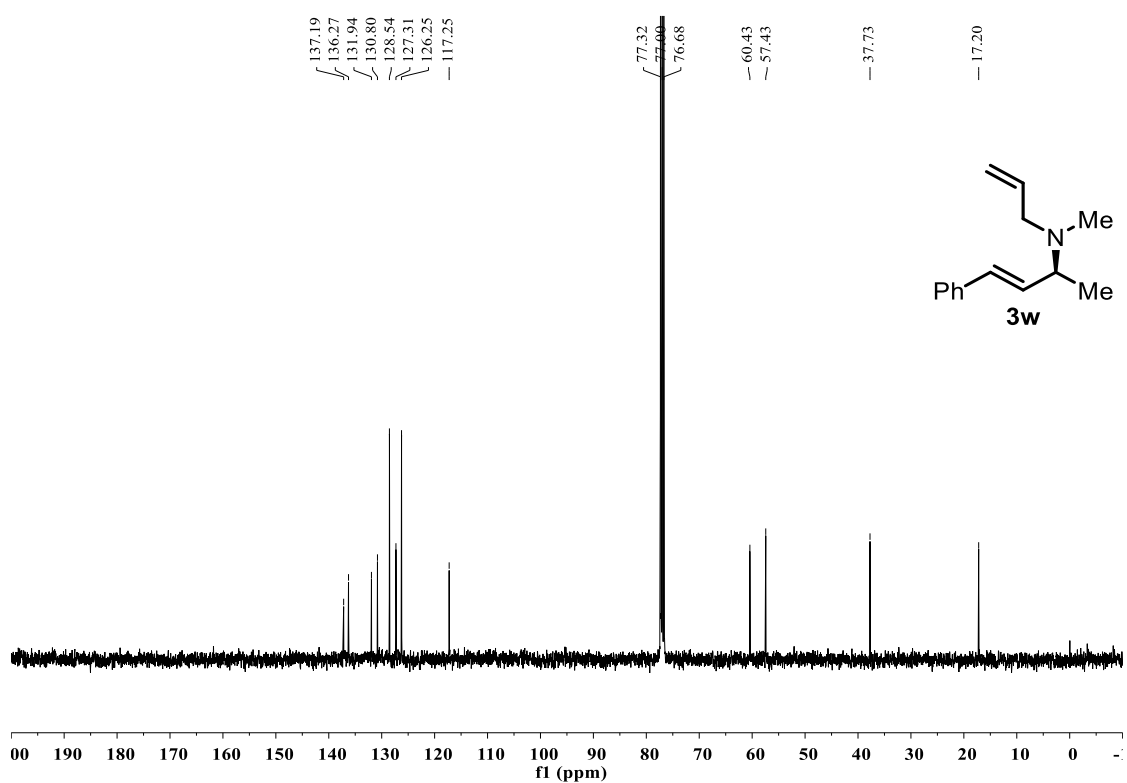

**Figure S68.** <sup>13</sup>C NMR spectra of **3w**, related to **Figure 3**.

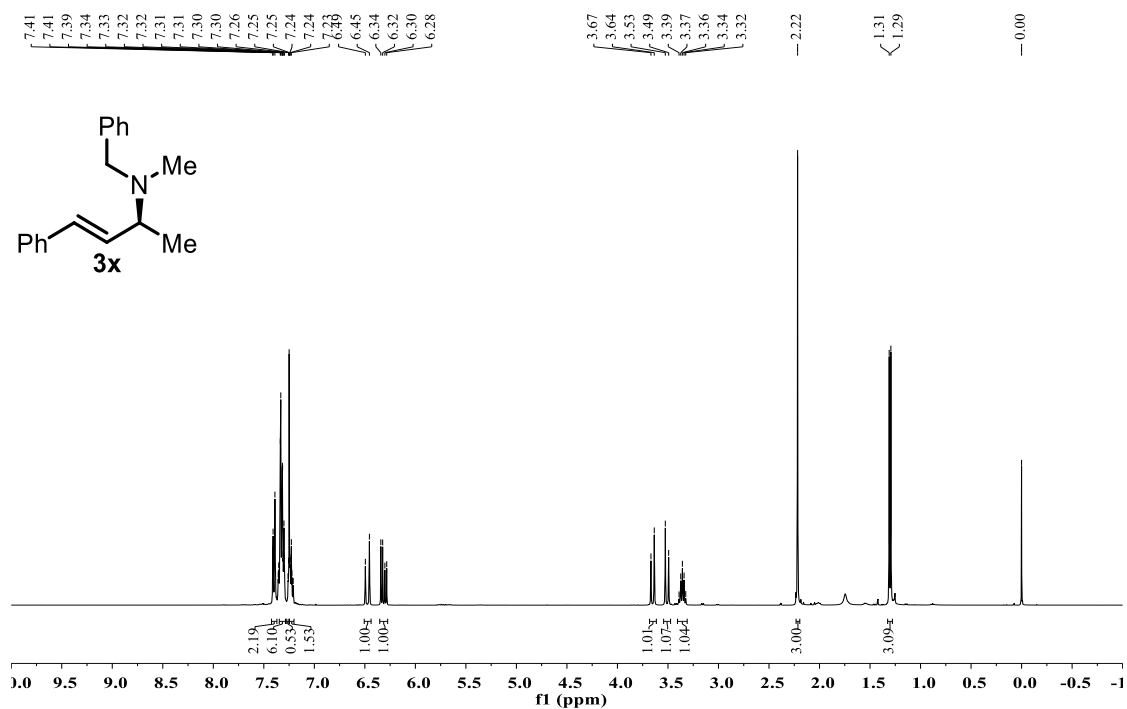

Figure S69. <sup>1</sup>H NMR spectra of **3x**, related to Figure 3.

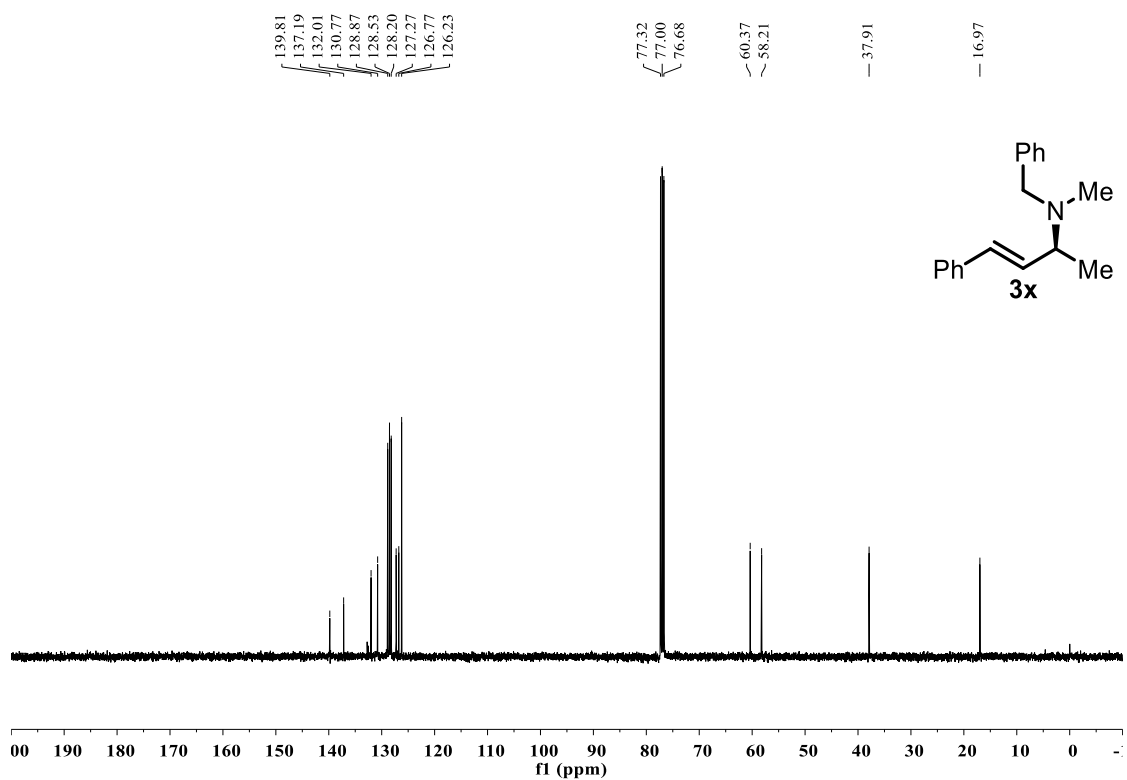

Figure S70. <sup>13</sup>C NMR spectra of **3x**, related to Figure 3.

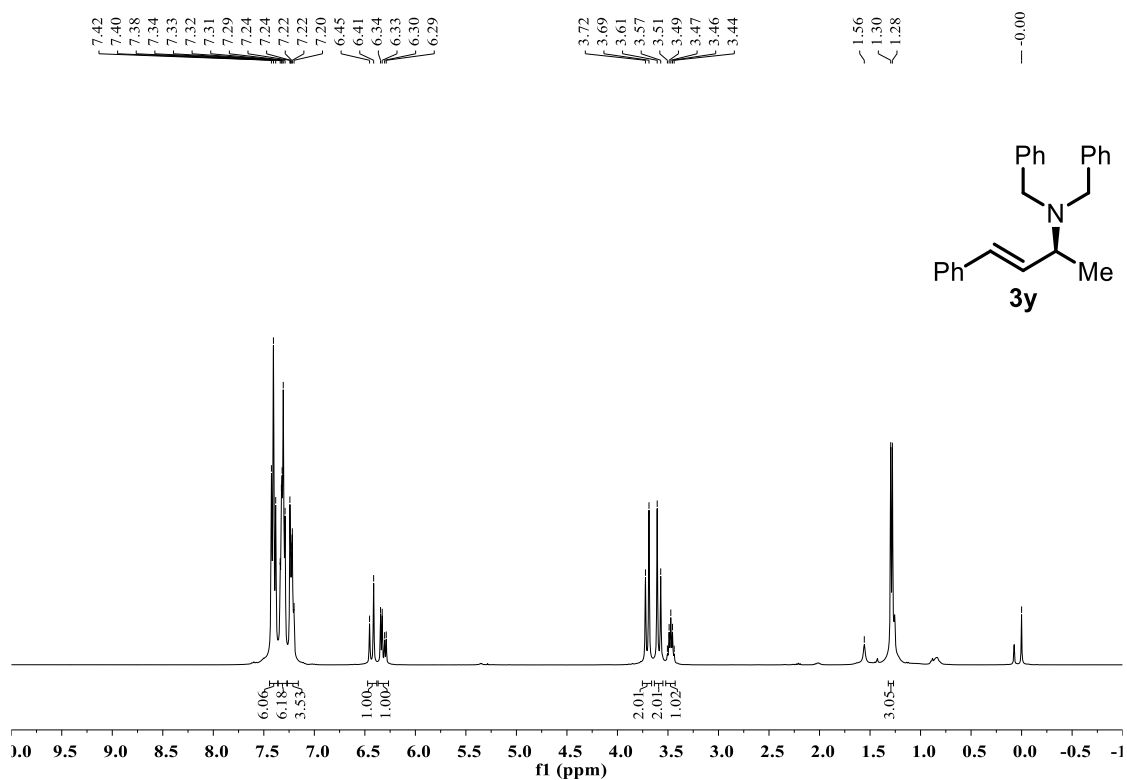

Figure S71. <sup>1</sup>H NMR spectra of **3y**, related to Figure 3.

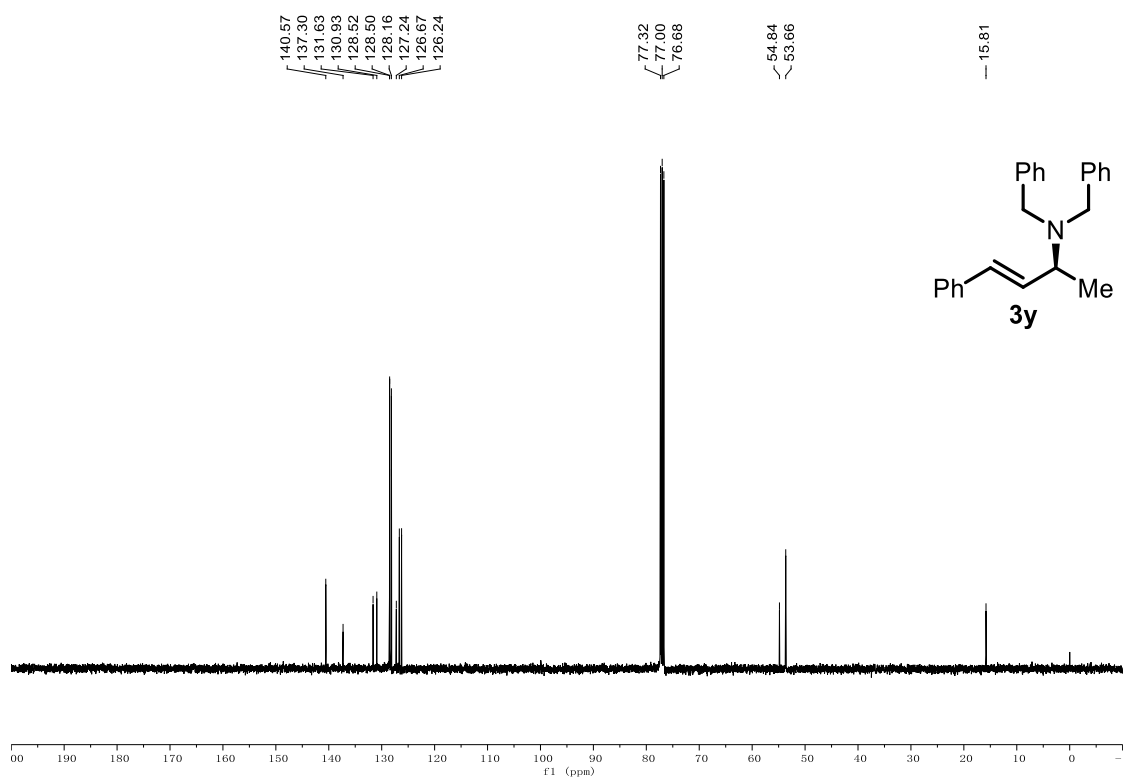

Figure S72. <sup>13</sup>C NMR spectra of **3y**, related to Figure 3.

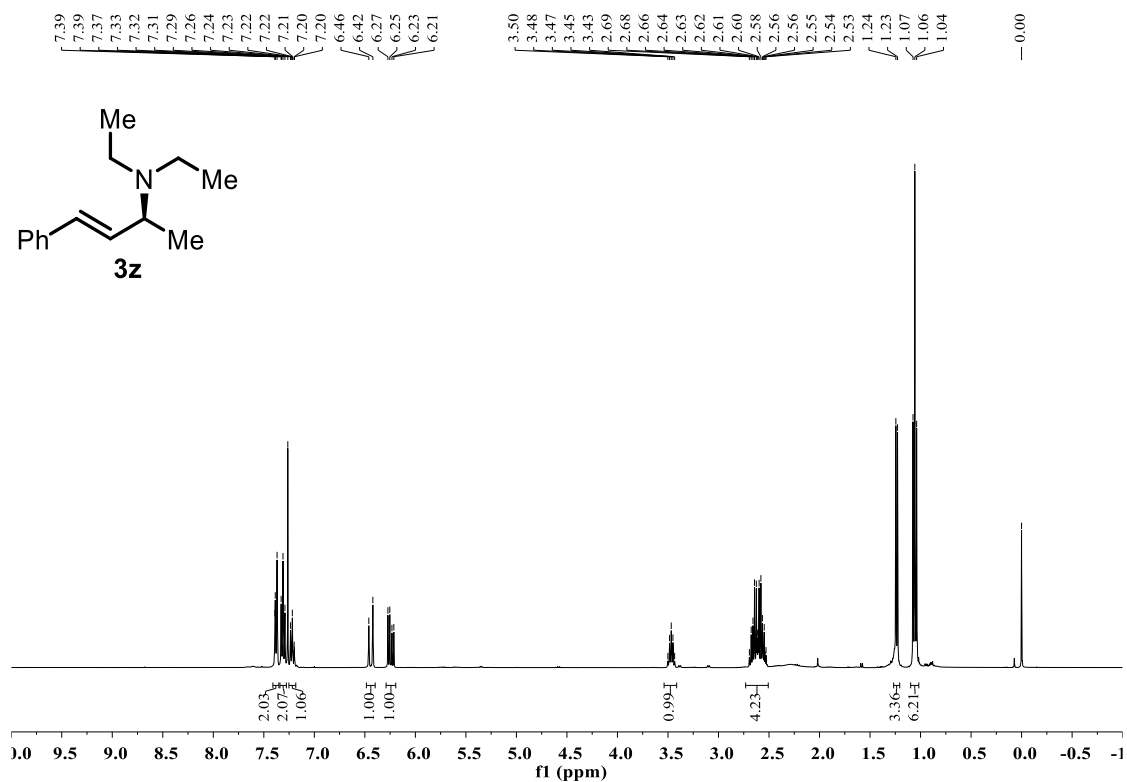

**Figure S73.** <sup>1</sup>H NMR spectra of **3z**, related to **Figure 3**.

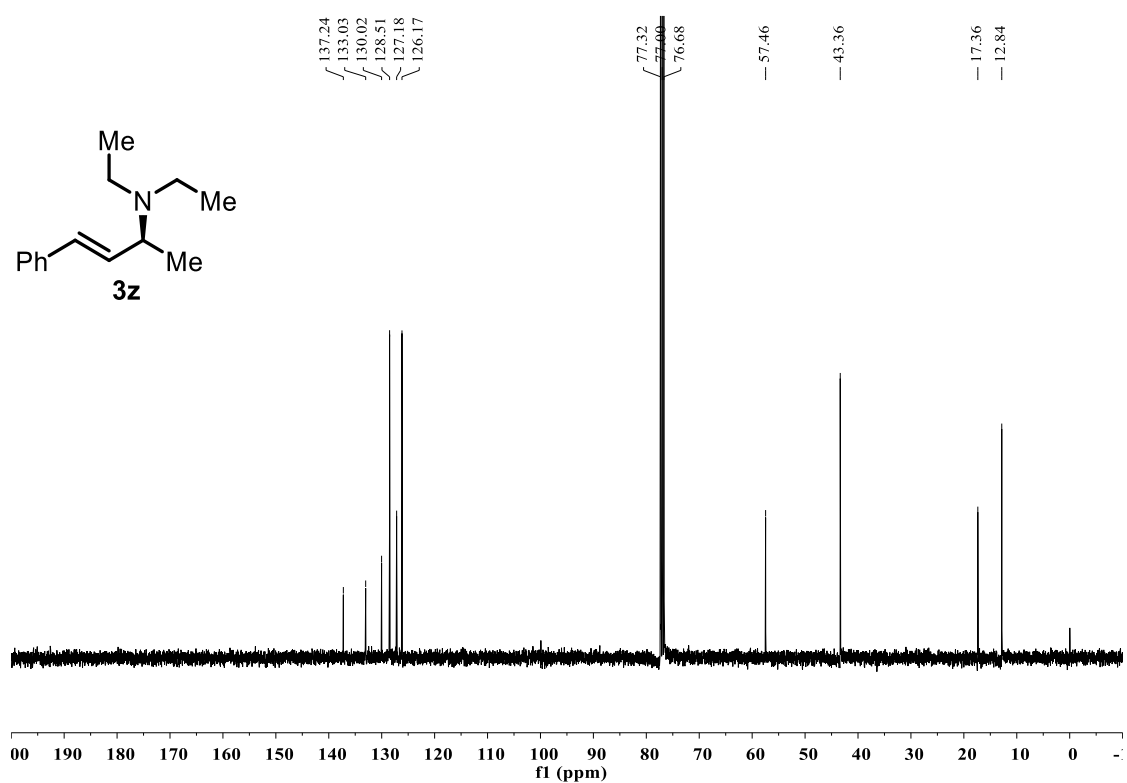

**Figure S74.** <sup>13</sup>C NMR spectra of **3z**, related to **Figure 3**.



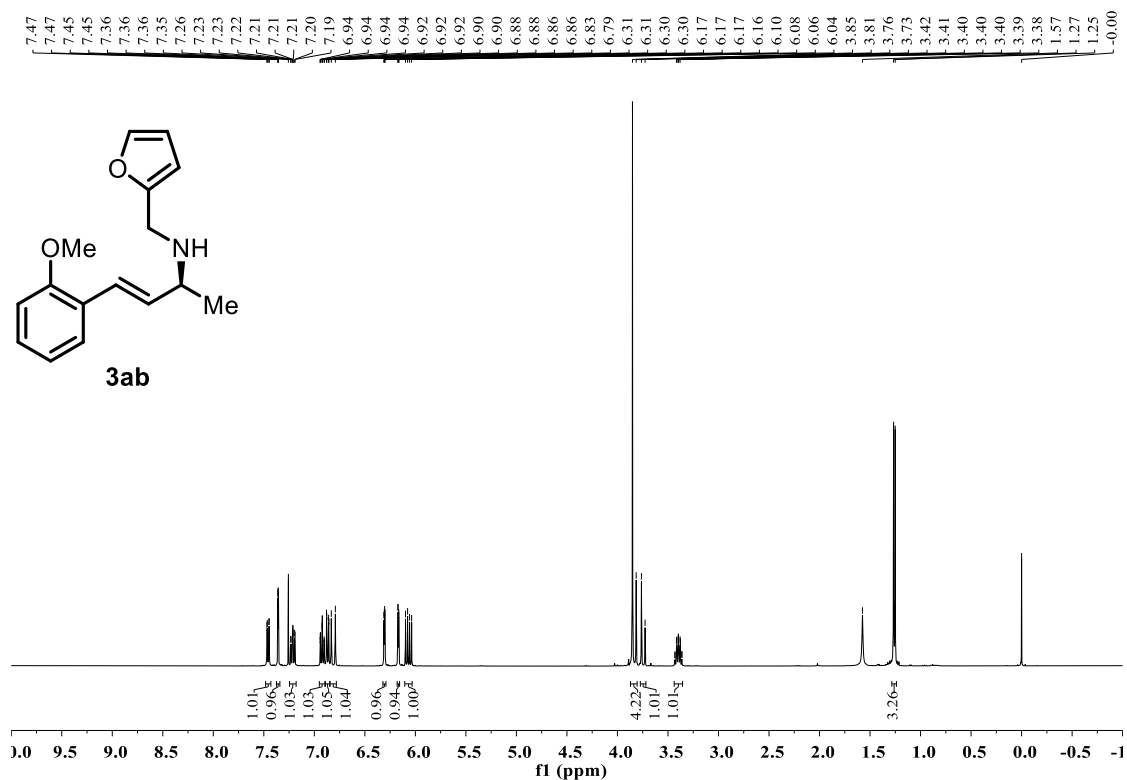

Figure S77. <sup>1</sup>H NMR spectra of **3ab**, related to Figure 4.

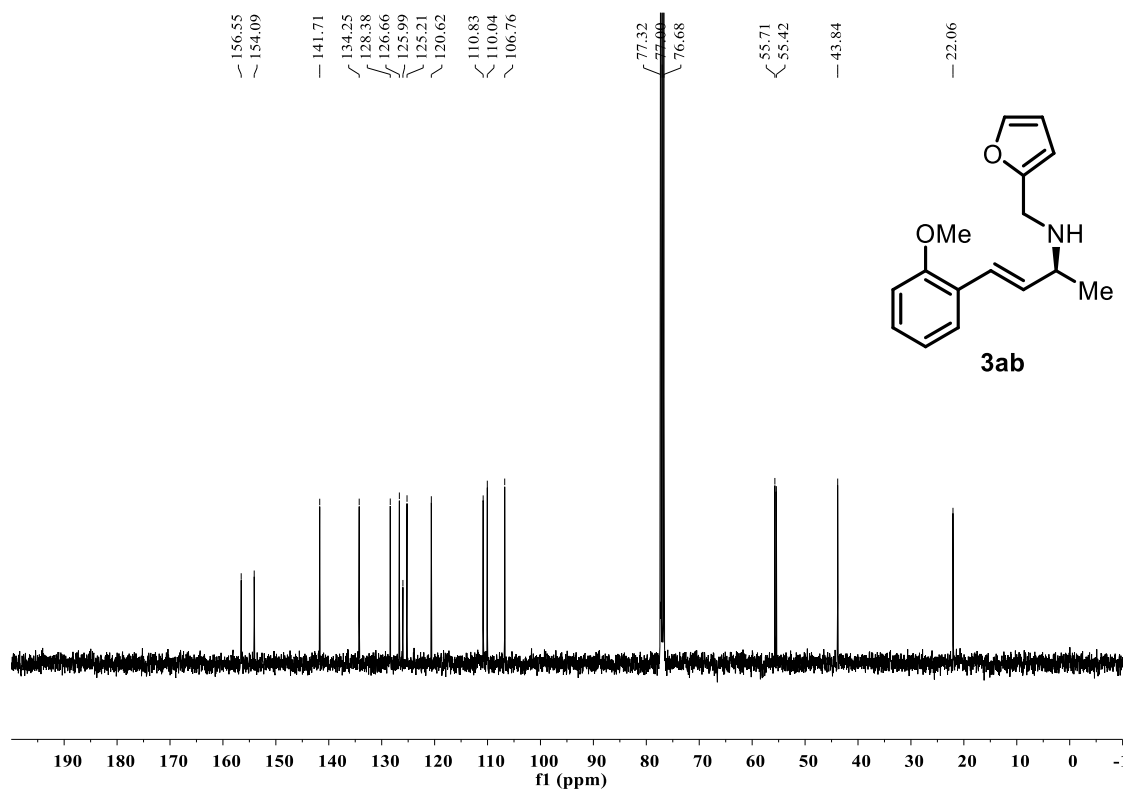

Figure S78. <sup>13</sup>C NMR spectra of **3ab**, related to Figure 4.



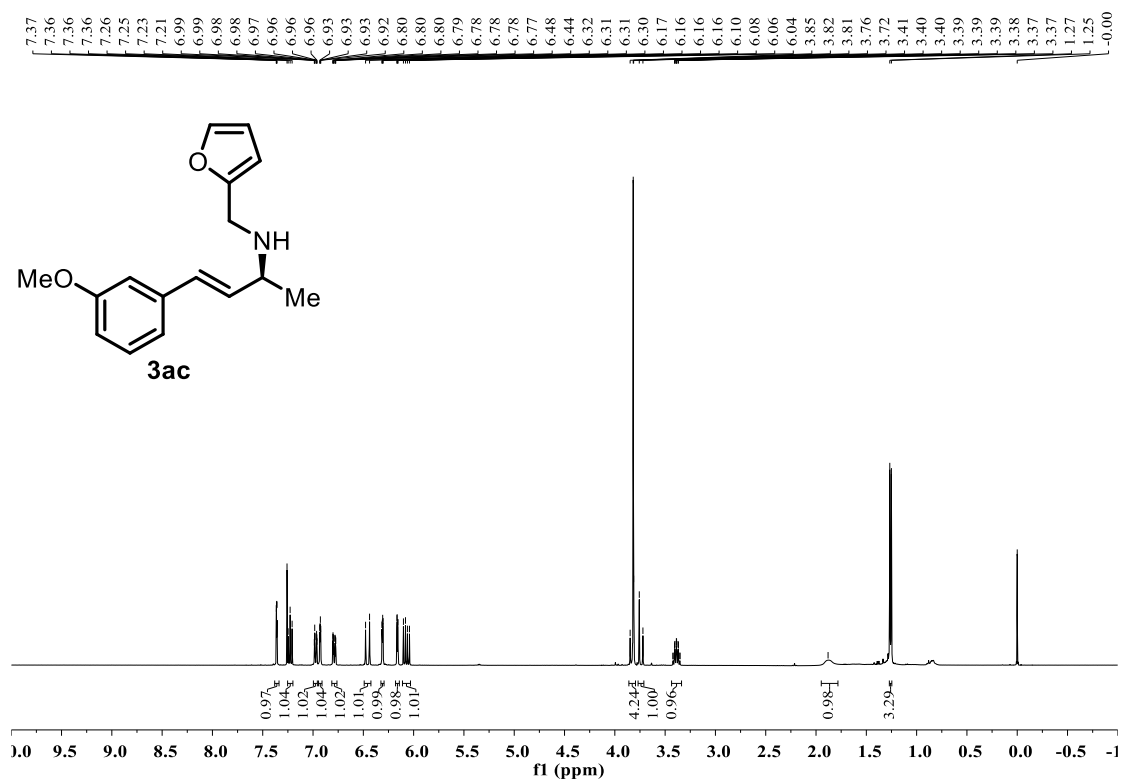

Figure S79. <sup>1</sup>H NMR spectra of **3ac**, related to Figure 4.

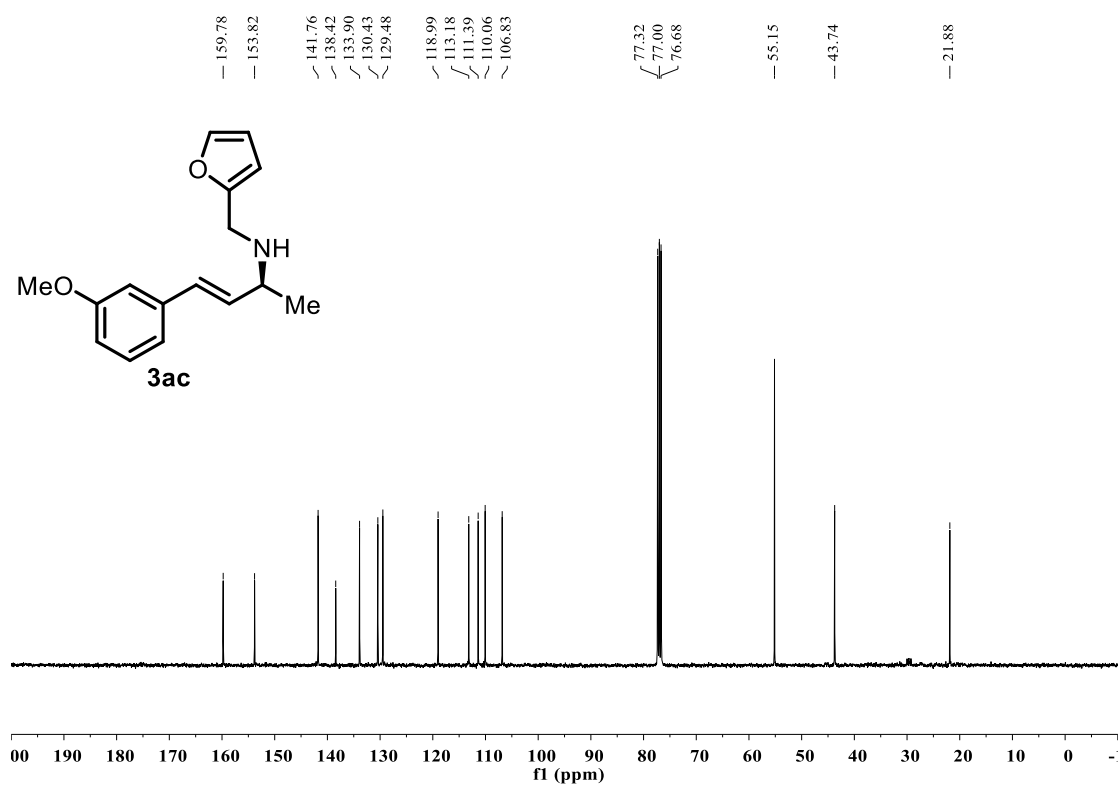

Figure S80. <sup>13</sup>C NMR spectra of **3ac**, related to Figure 4.

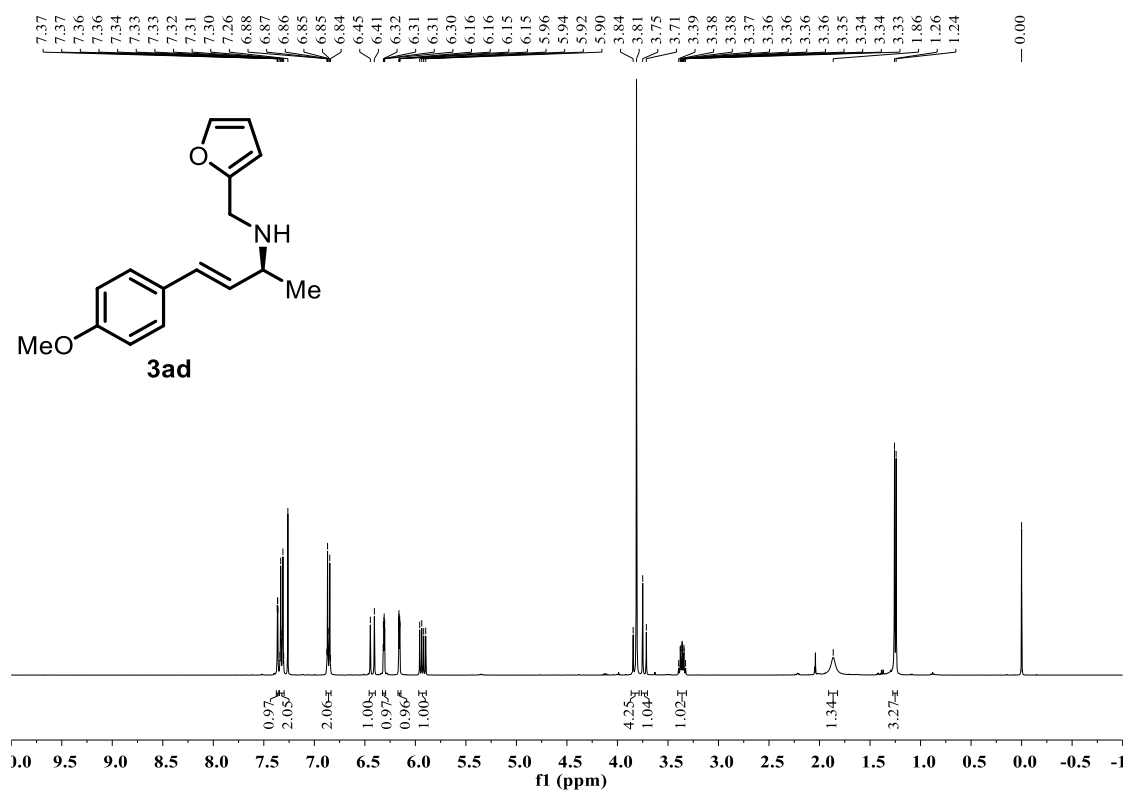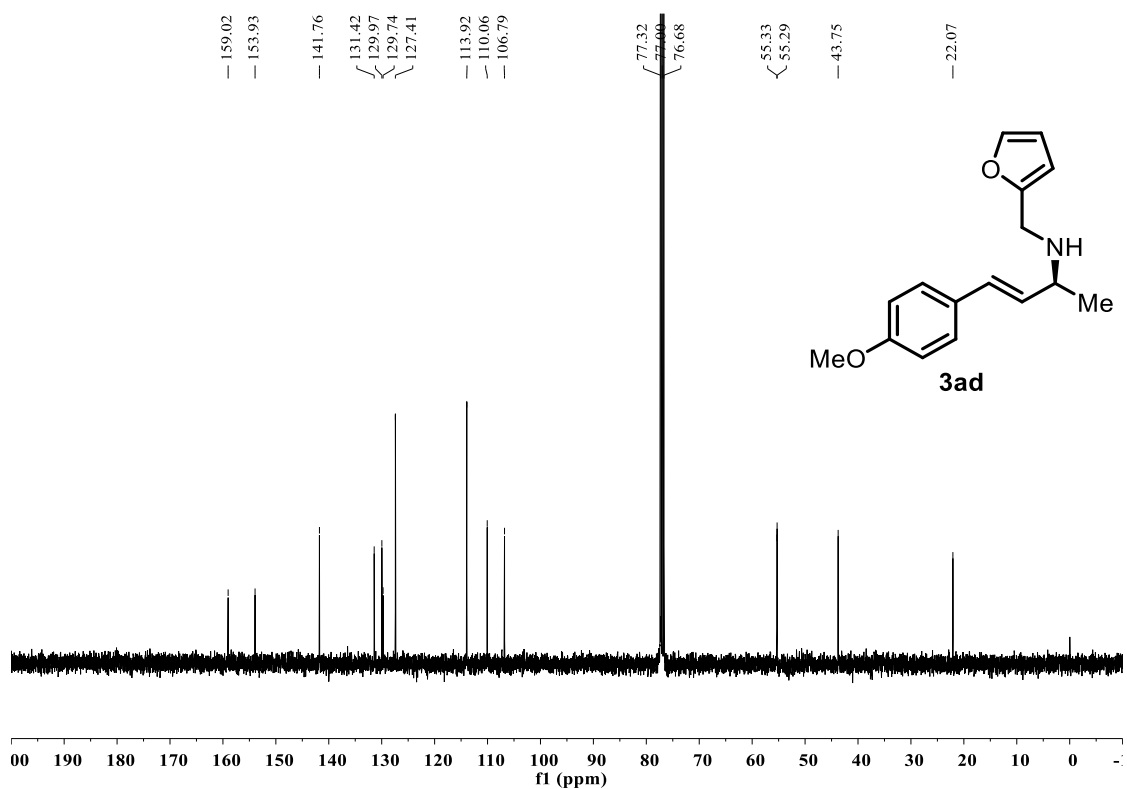

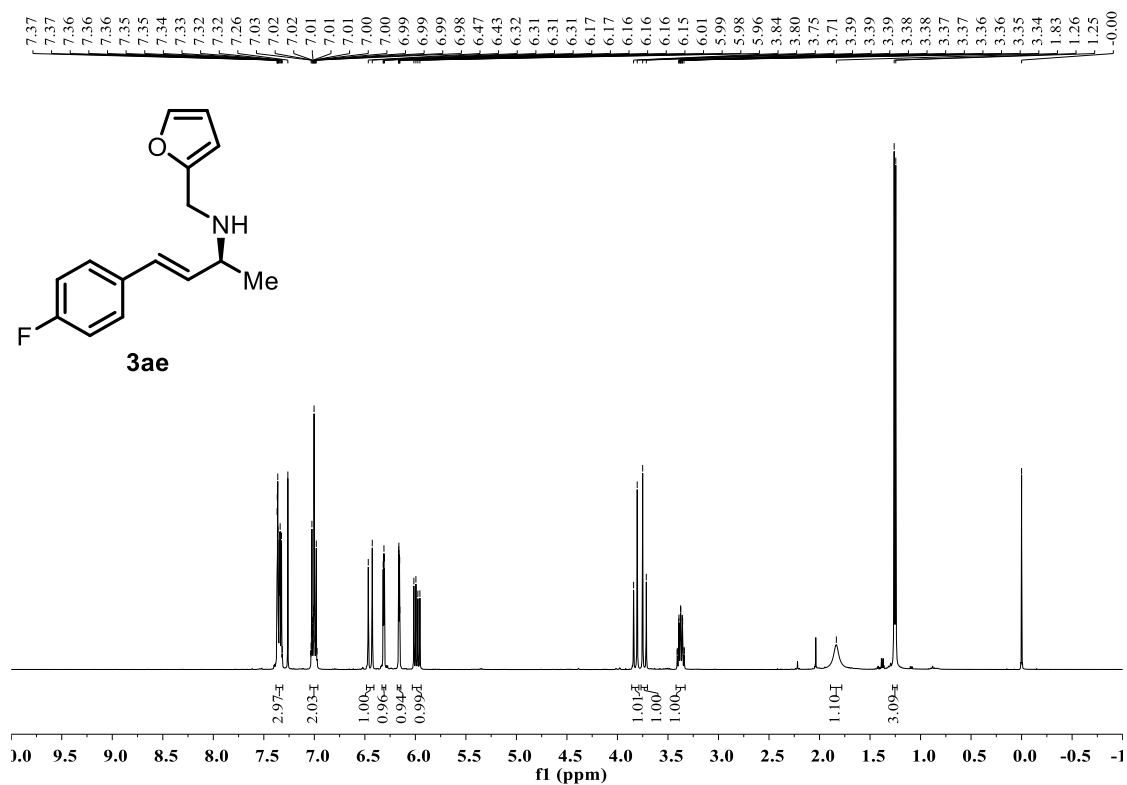

**Figure S83.** <sup>1</sup>H NMR spectra of **3ae**, related to **Figure 4**.

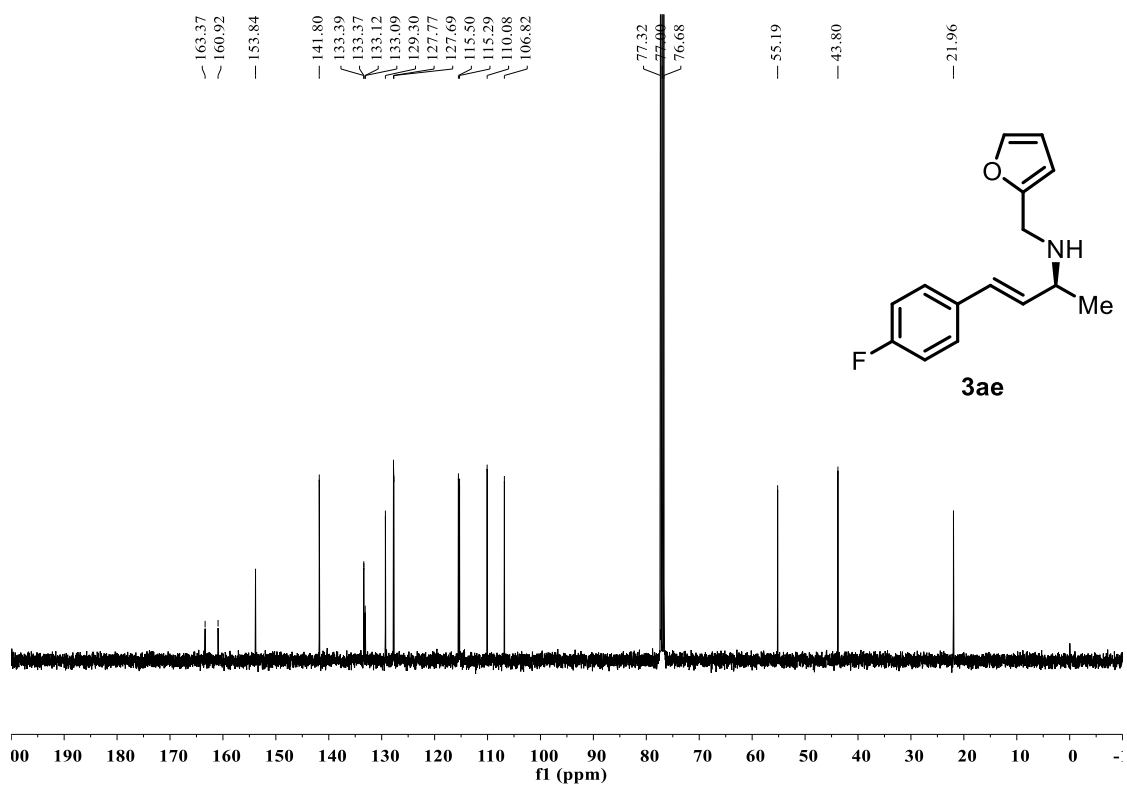

**Figure S84.** <sup>13</sup>C NMR spectra of **3ae**, related to **Figure 4**.

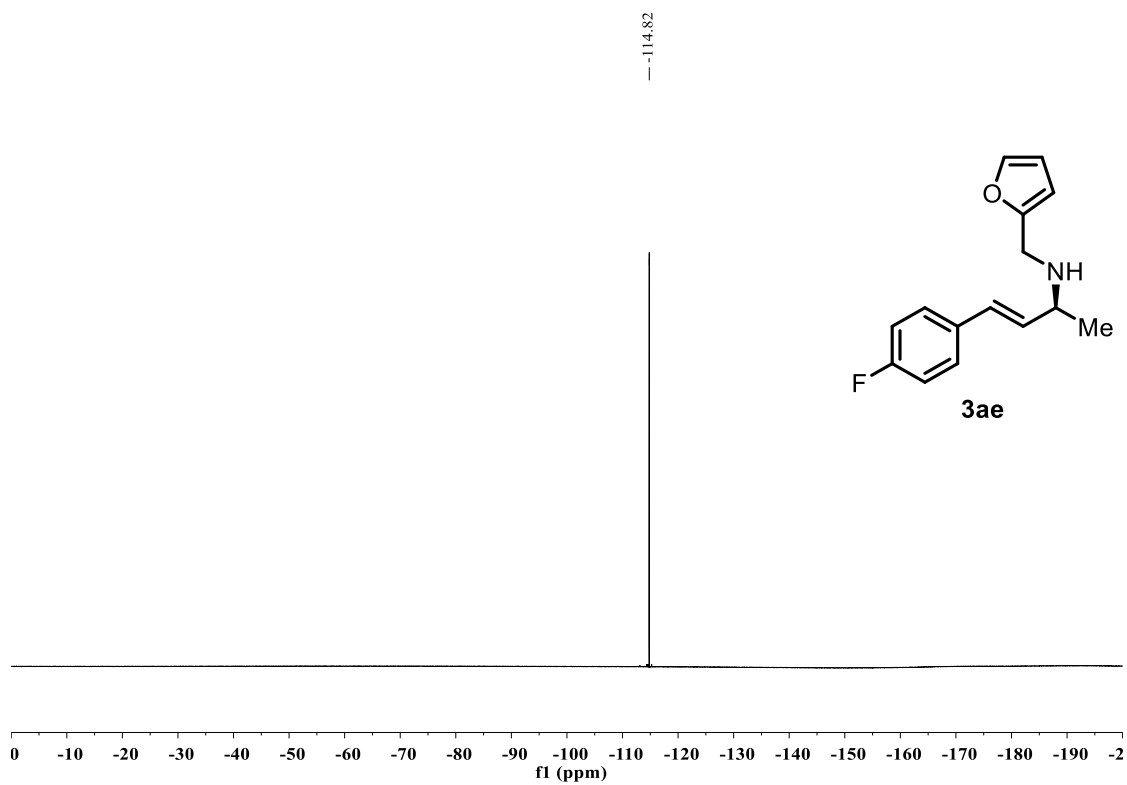

**Figure S85.**  $^{19}\text{F}$  NMR spectra of **3ae**, related to **Figure 4**.

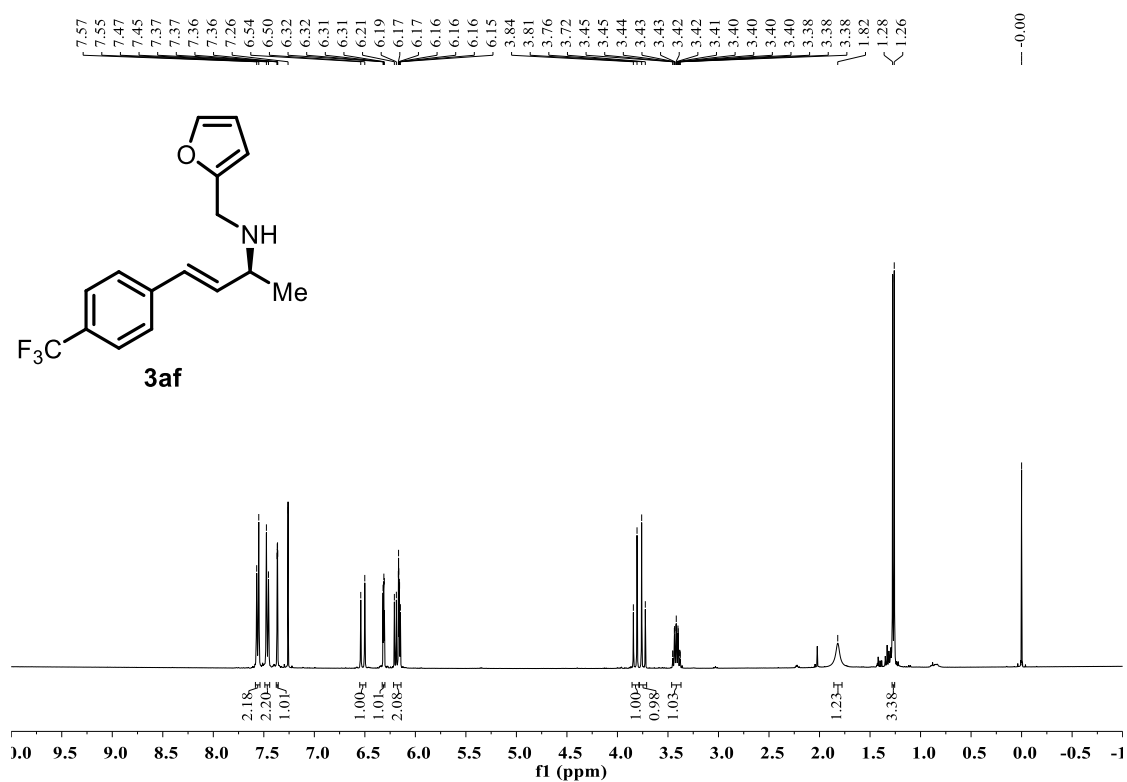

**Figure S86.**  $^1\text{H}$  NMR spectra of **3af**, related to **Figure 4**.

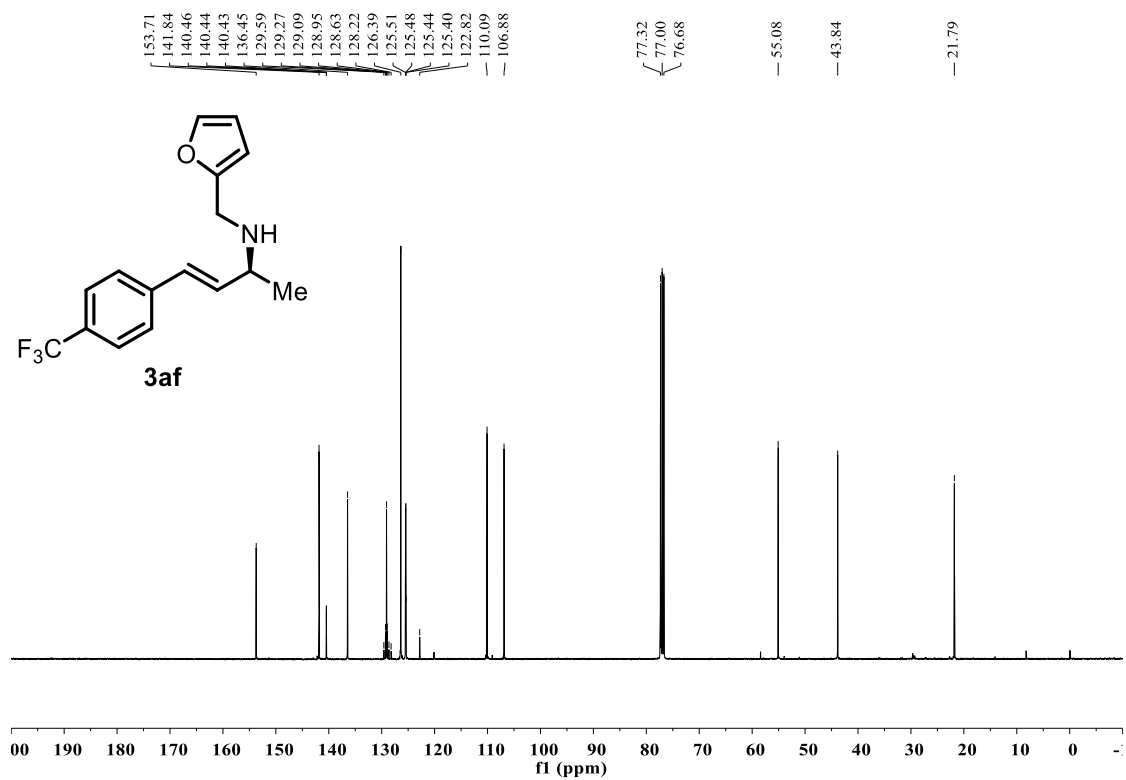

**Figure S87.**  $^{13}\text{C}$  NMR spectra of **3af**, related to **Figure 4**.

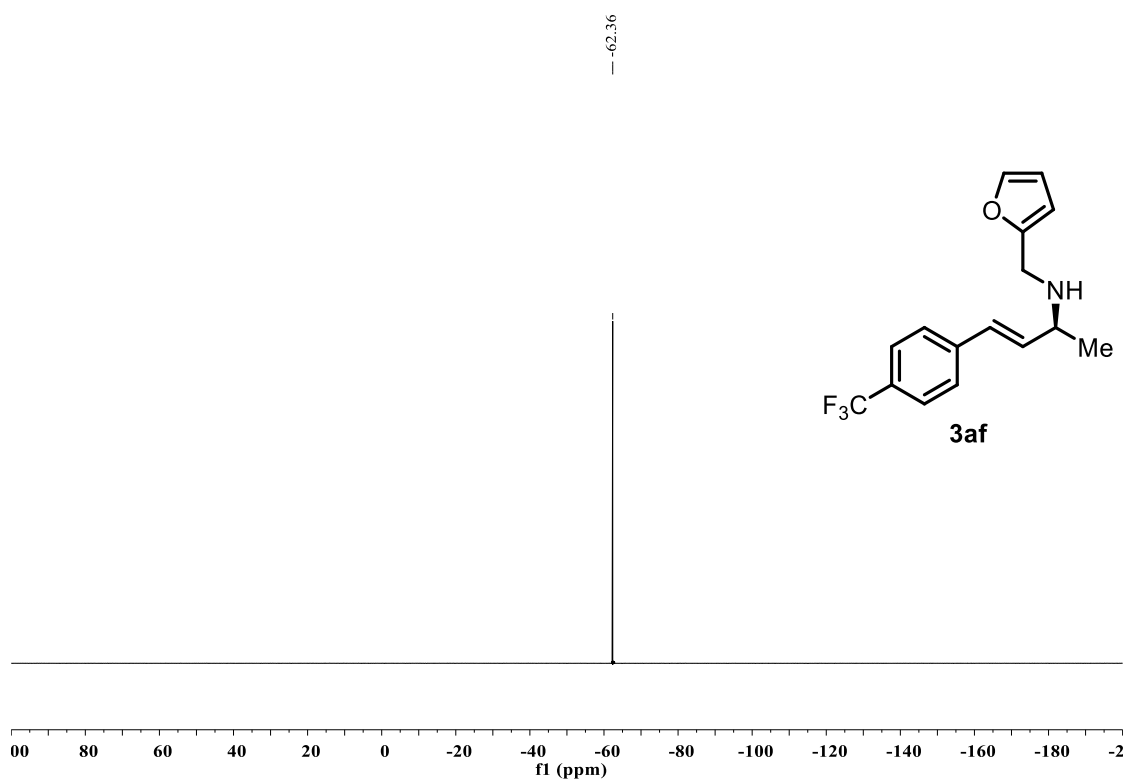

**Figure S88.**  $^{19}\text{F}$  NMR spectra of **3af**, related to **Figure 4**.

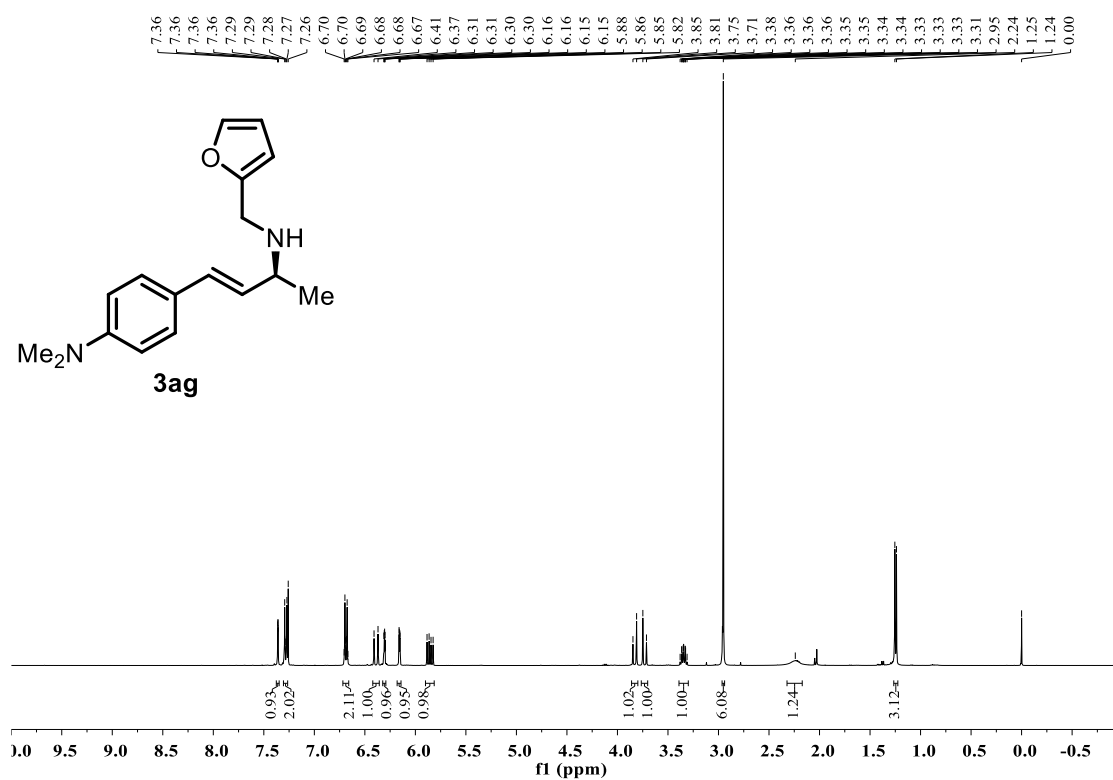

Figure S89. <sup>1</sup>H NMR spectra of **3ag**, related to Figure 4.

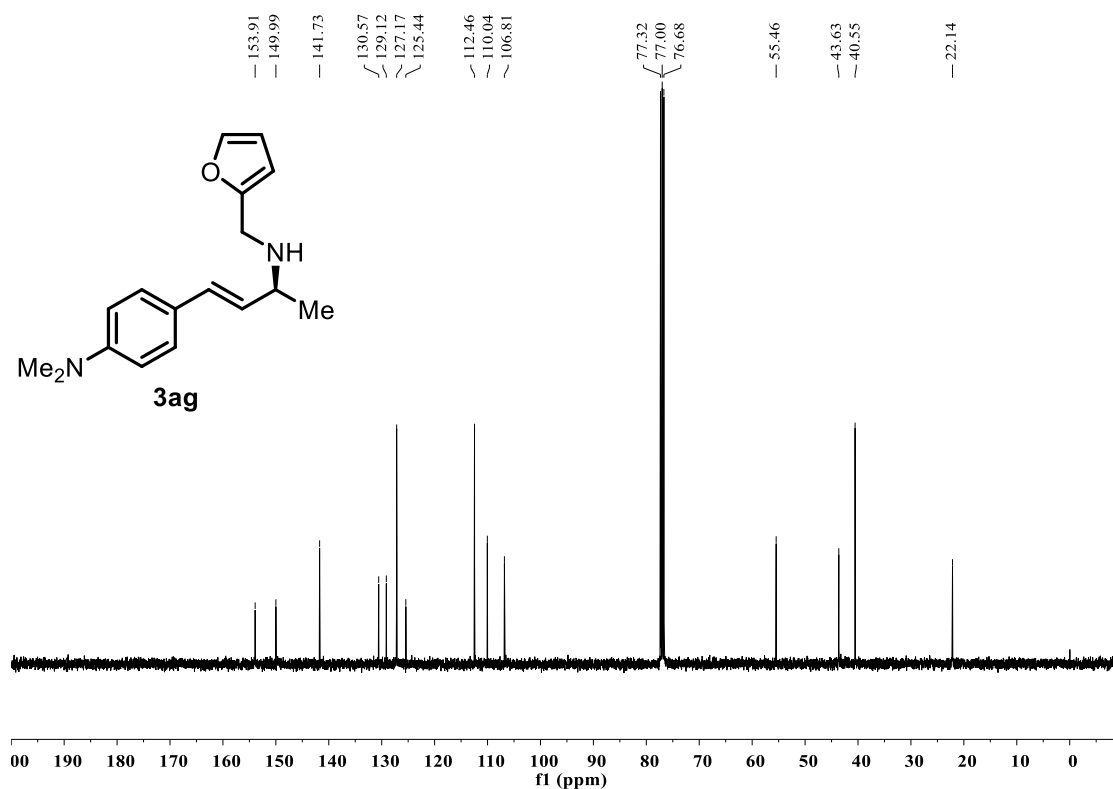

Figure S90. <sup>13</sup>C NMR spectra of **3ag**, related to Figure 4.

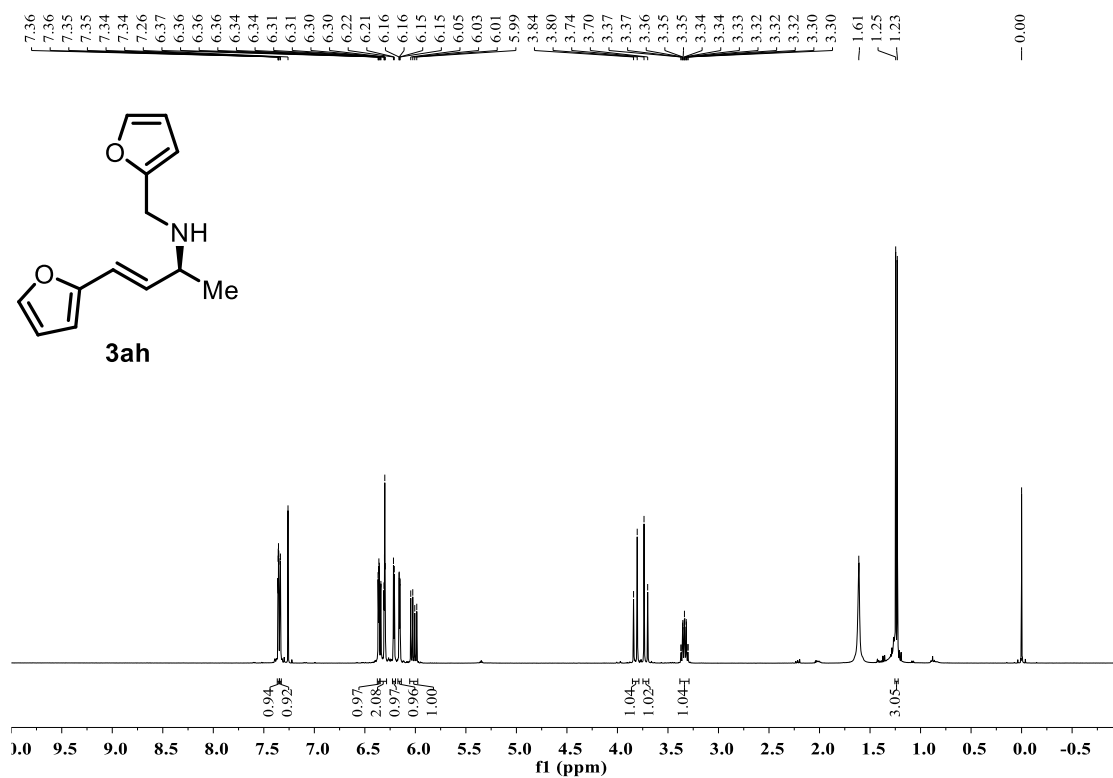

**Figure S91.** <sup>1</sup>H NMR spectra of **3ah**, related to **Figure 4**.

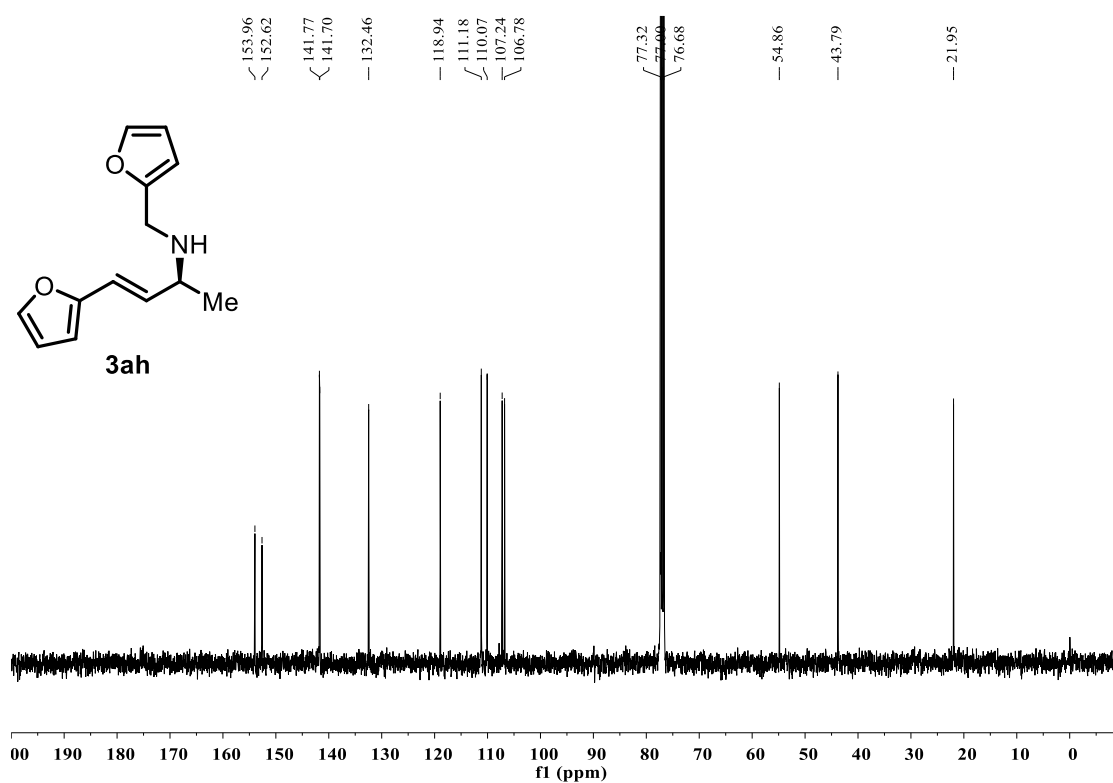

**Figure S92.** <sup>13</sup>C NMR spectra of **3ah**, related to **Figure 4**.

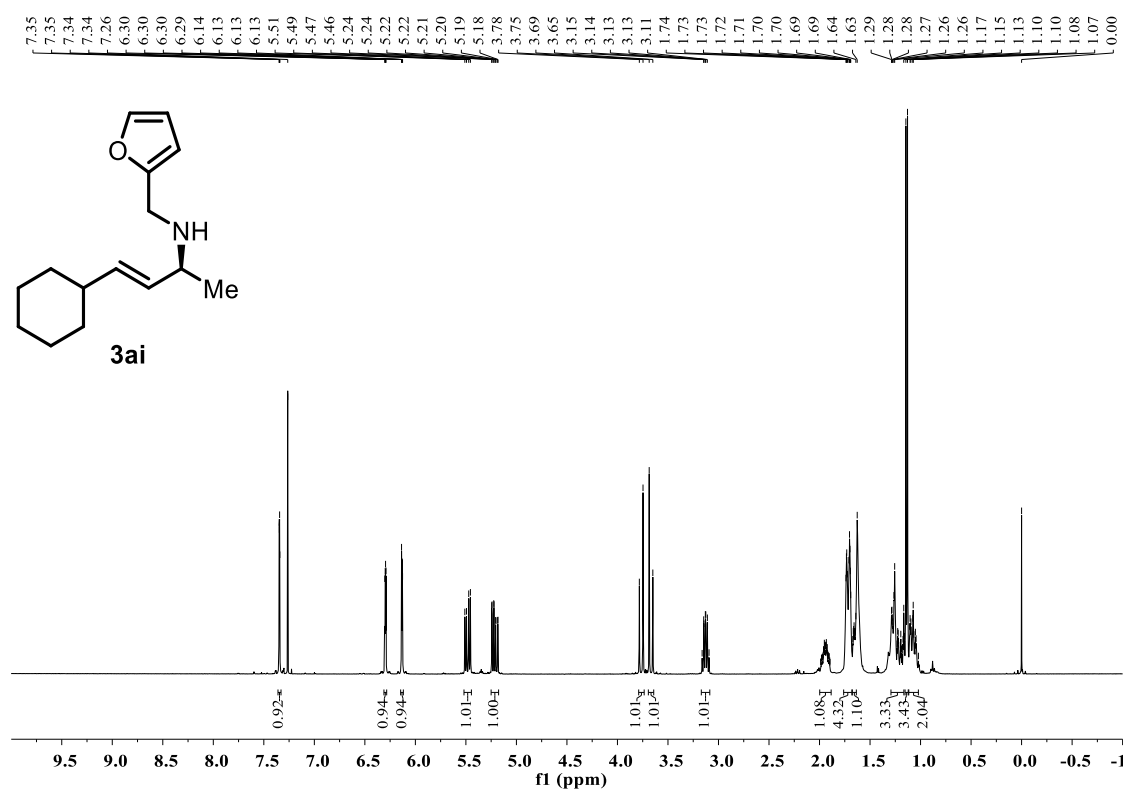

Figure S93.  $^1\text{H}$  NMR spectra of **3ai**, related to Figure 4.

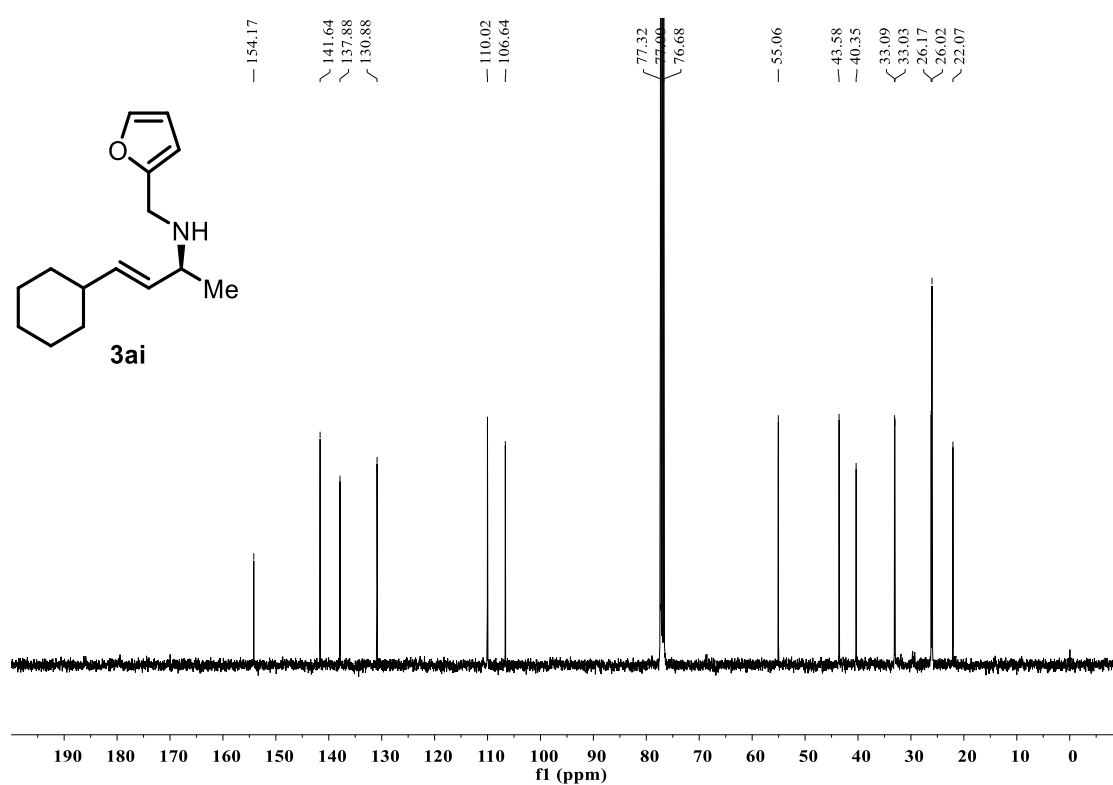

Figure S94.  $^{13}\text{C}$  NMR spectra of **3ai**, related to Figure 4.



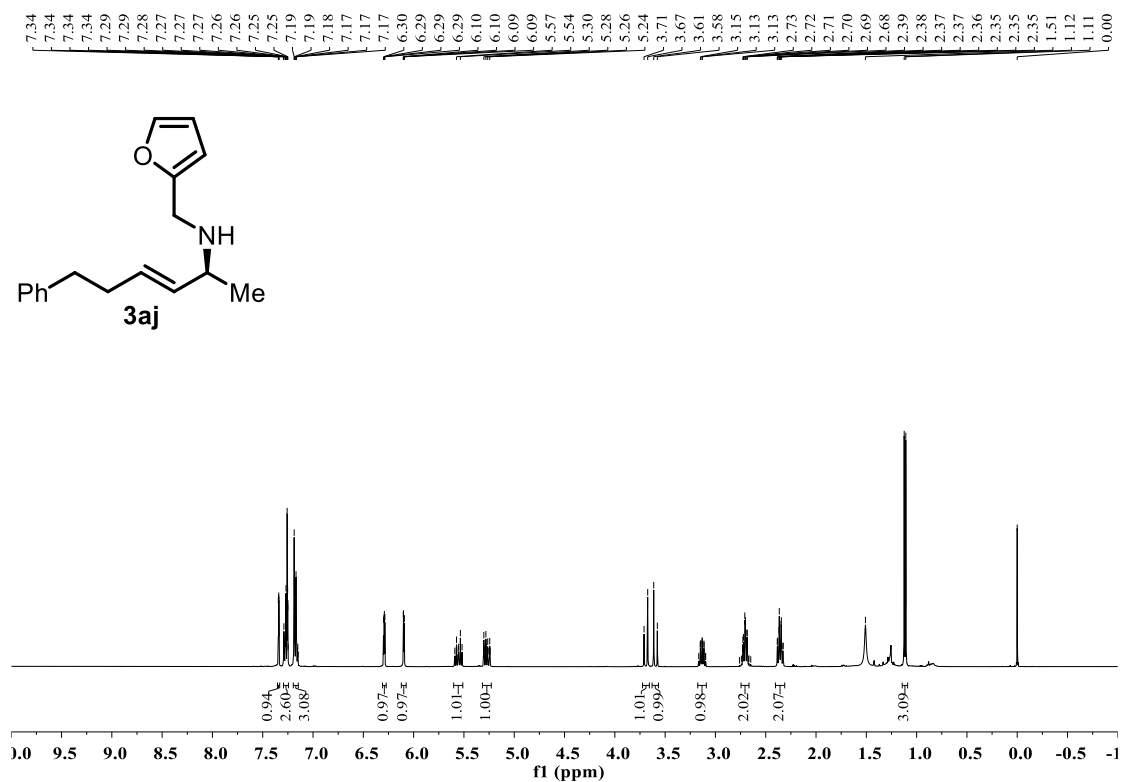

Figure S95. <sup>1</sup>H NMR spectra of **3aj**, related to Figure 4.

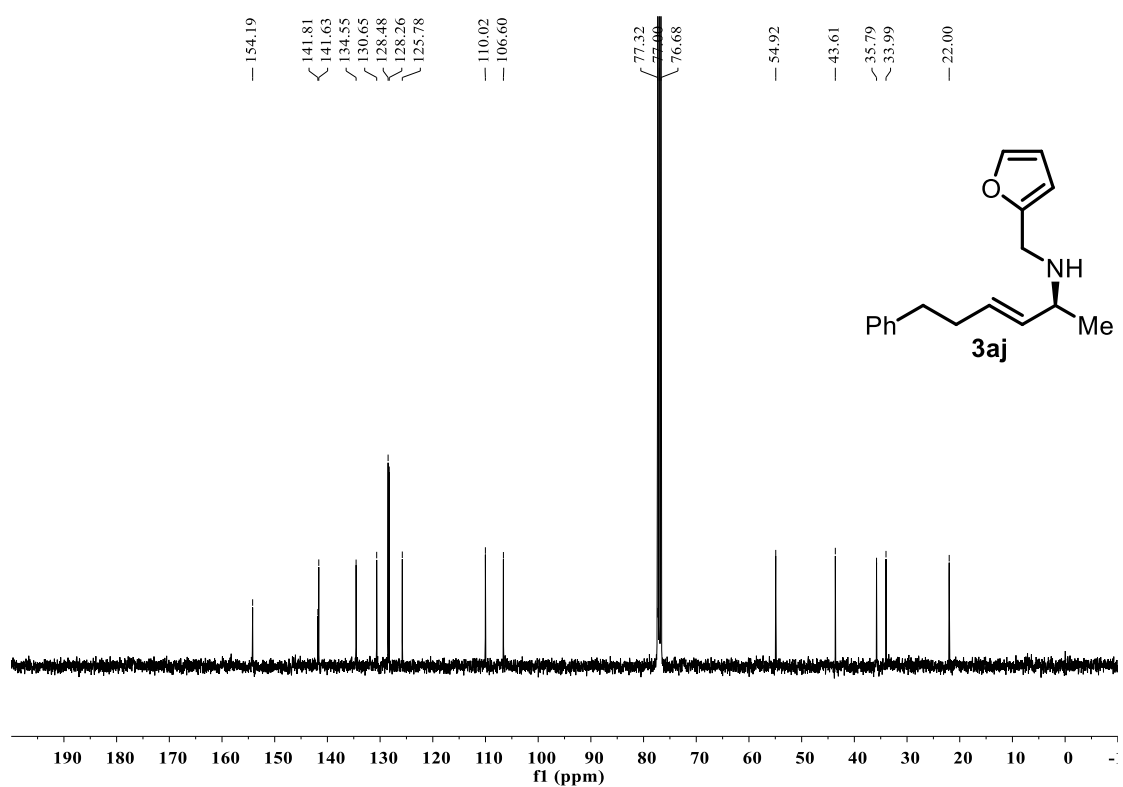

Figure S96. <sup>13</sup>C NMR spectra of **3aj**, related to Figure 4.

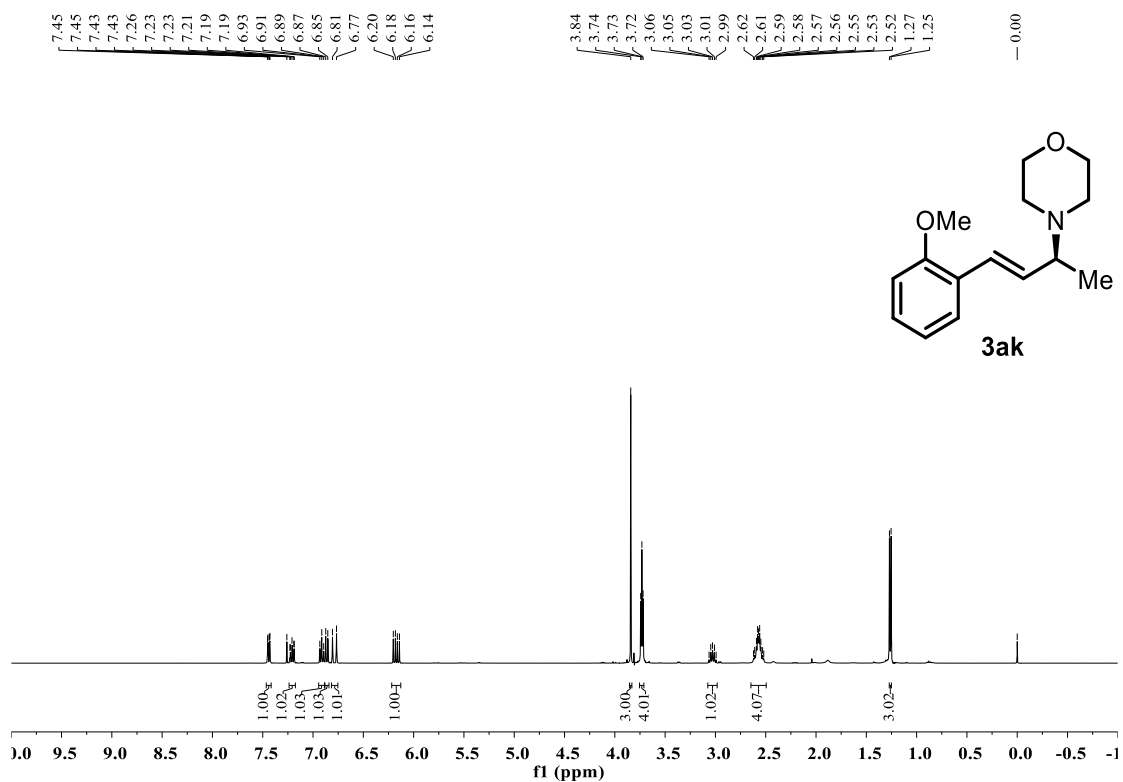

Figure S97. <sup>1</sup>H NMR spectra of **3ak**, related to Figure 4.

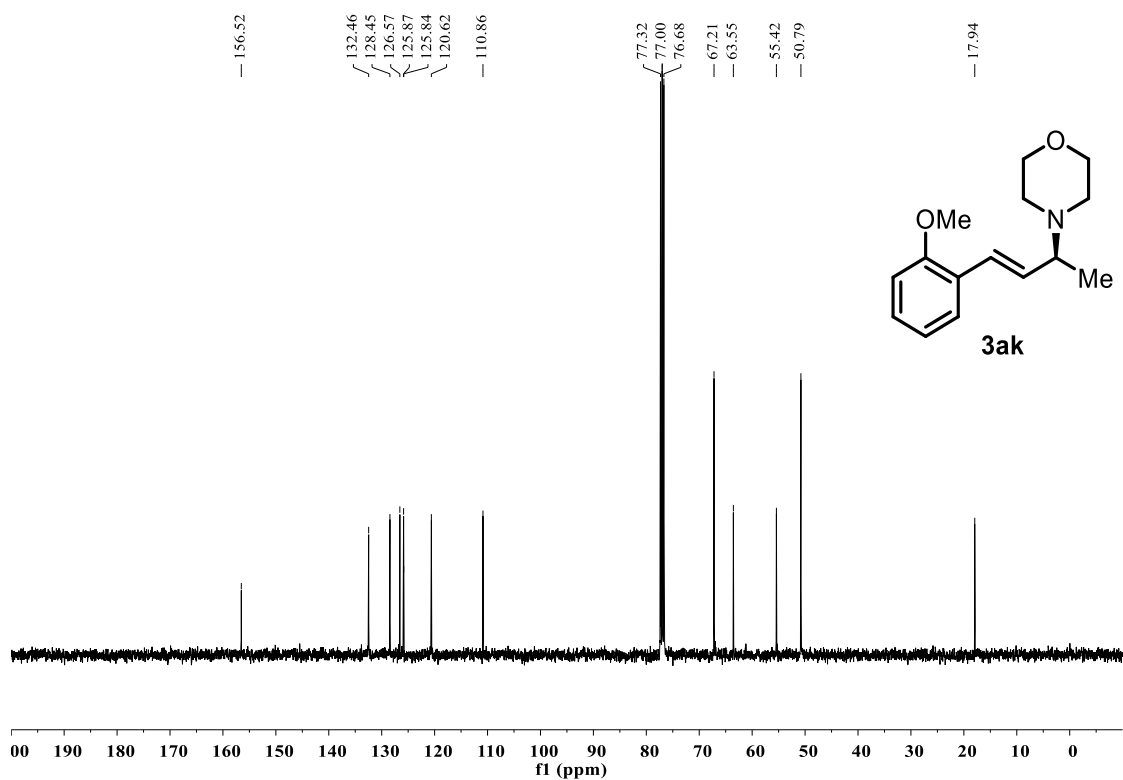

Figure S98. <sup>13</sup>C NMR spectra of **3ak**, related to Figure 4.

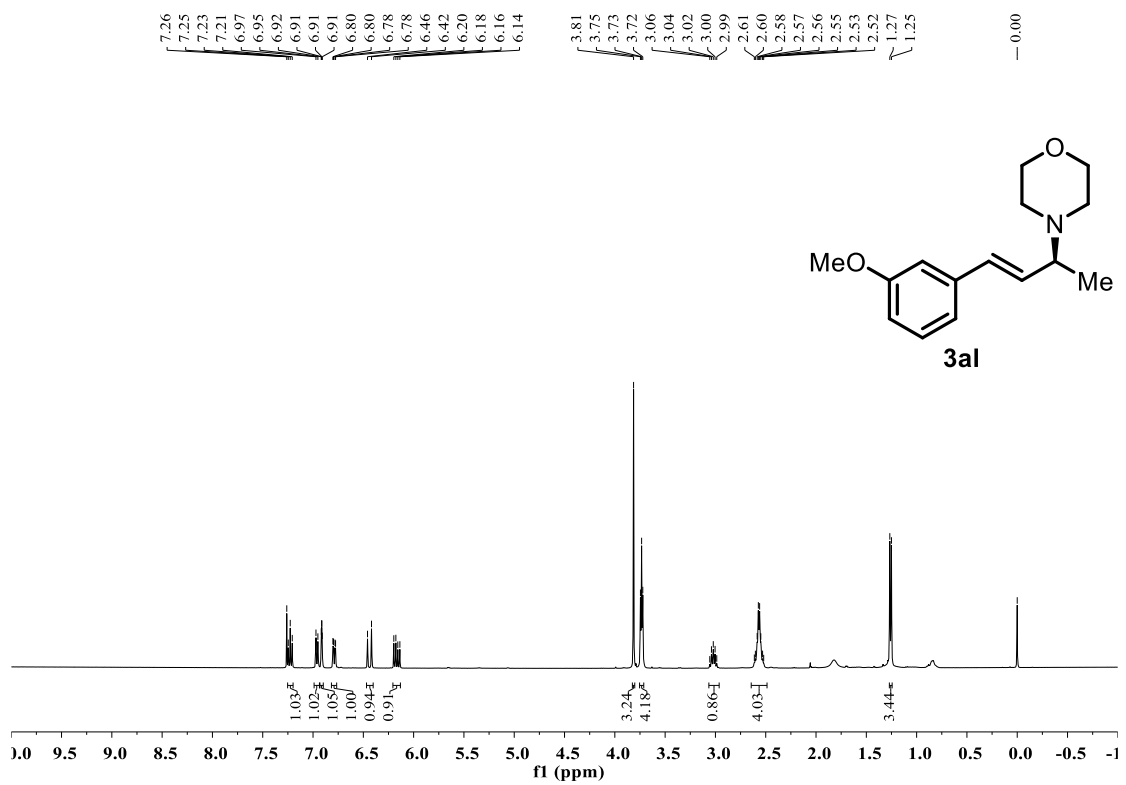

**Figure S99.** <sup>1</sup>H NMR spectra of **3al**, related to **Figure 4**.

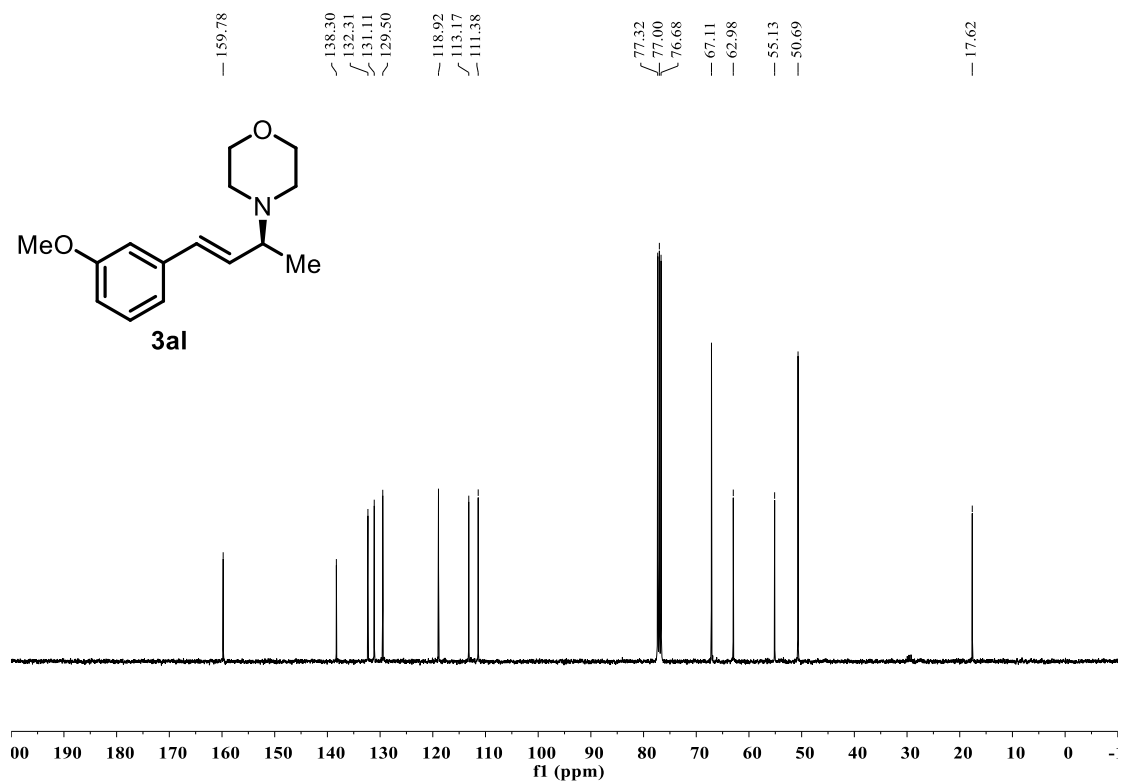

**Figure S100.** <sup>13</sup>C NMR spectra of **3al**, related to **Figure 4**.

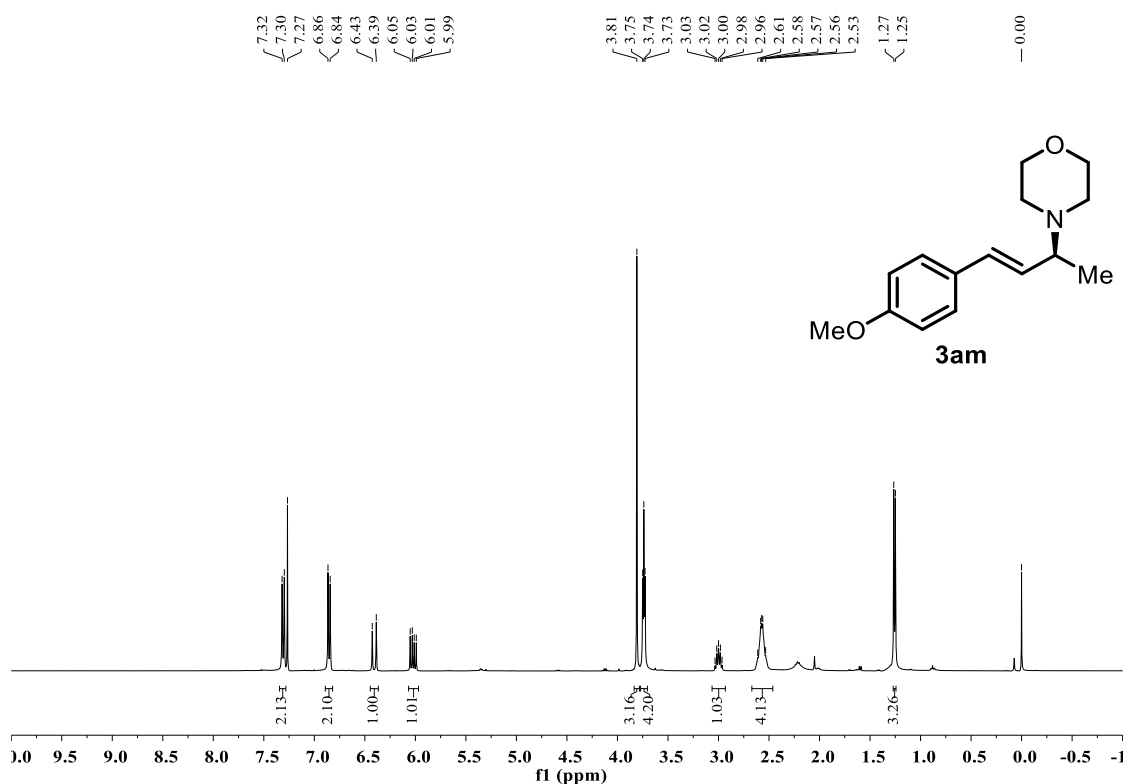

Figure S101. <sup>1</sup>H NMR spectra of **3am**, related to Figure 4.

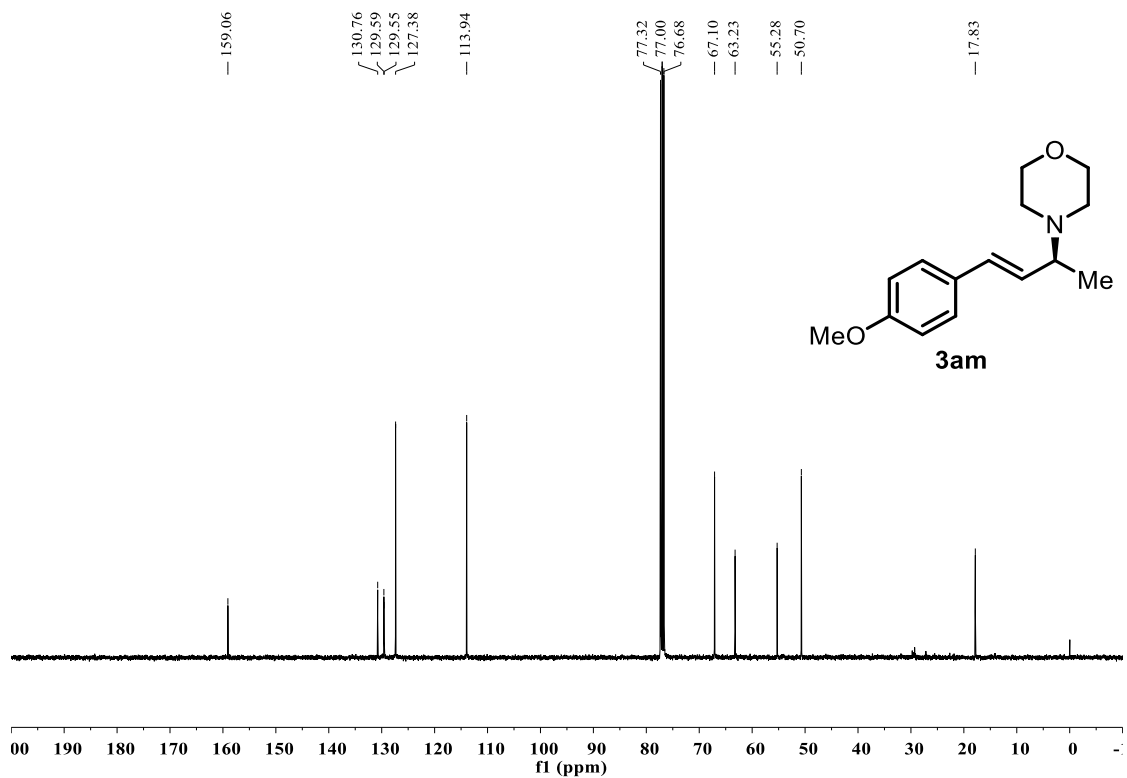

Figure S102. <sup>13</sup>C NMR spectra of **3am**, related to Figure 4.

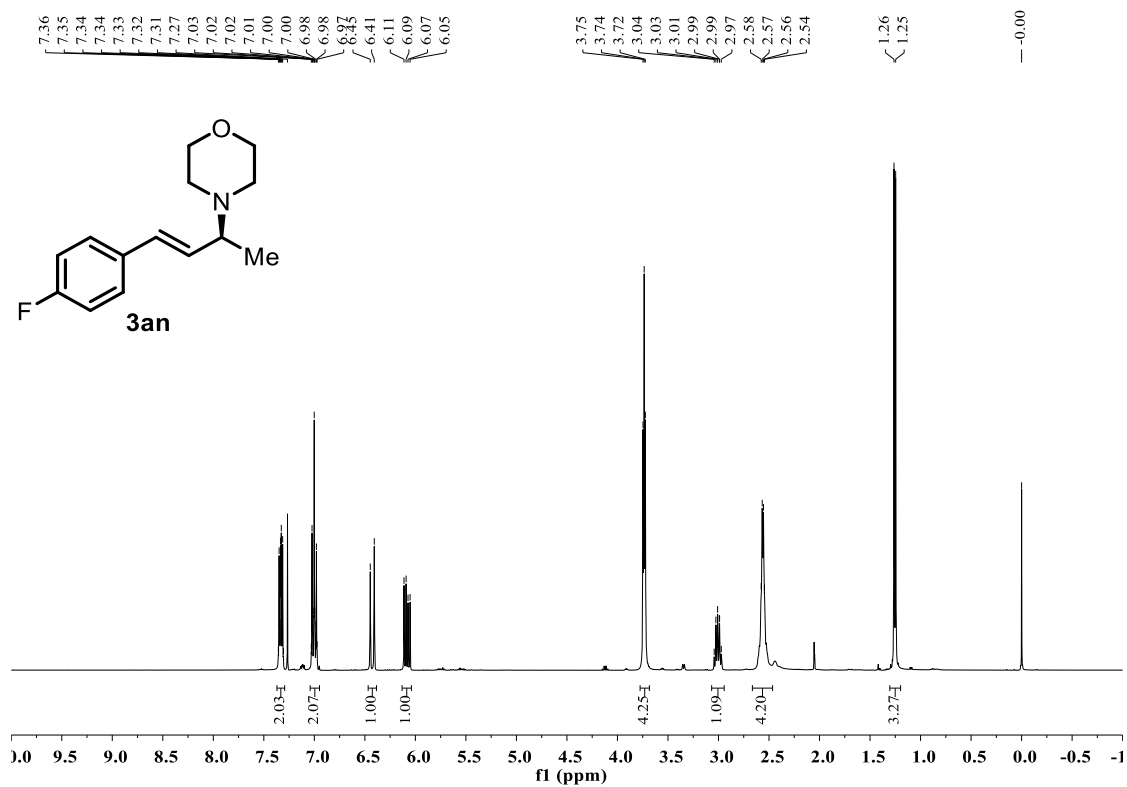

Figure S103. <sup>1</sup>H NMR spectra of **3an**, related to Figure 4.

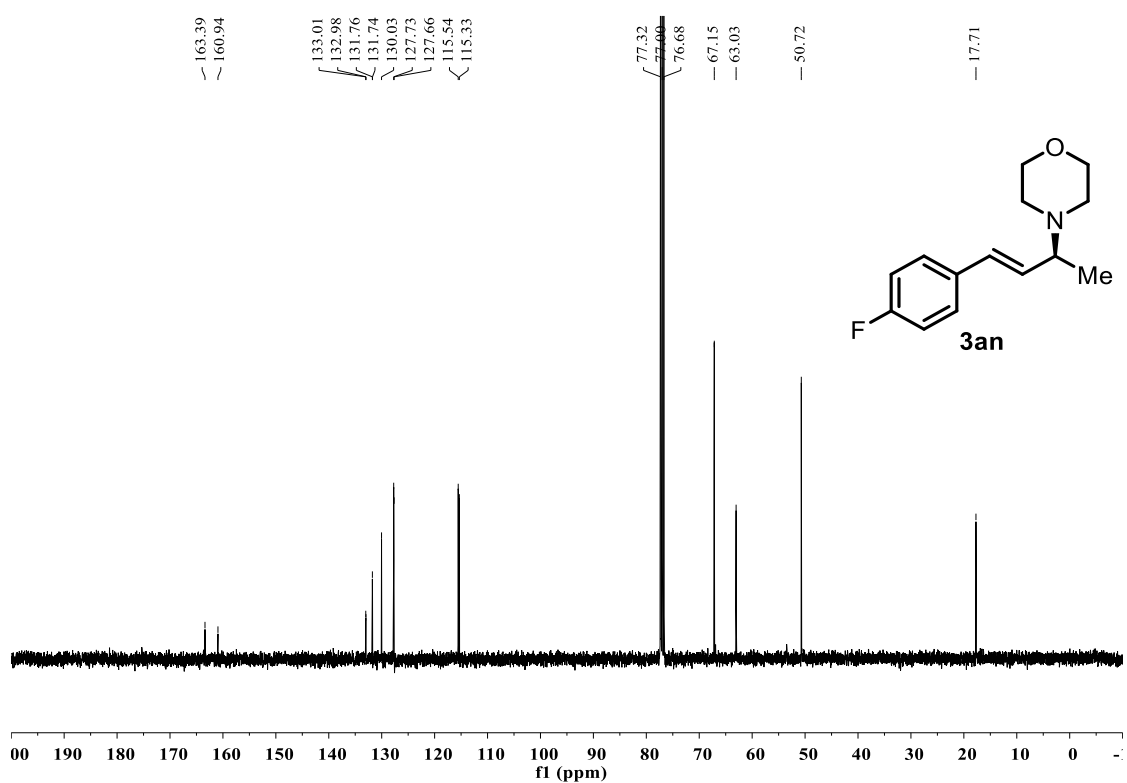

Figure S104. <sup>13</sup>C NMR spectra of **3an**, related to Figure 4.

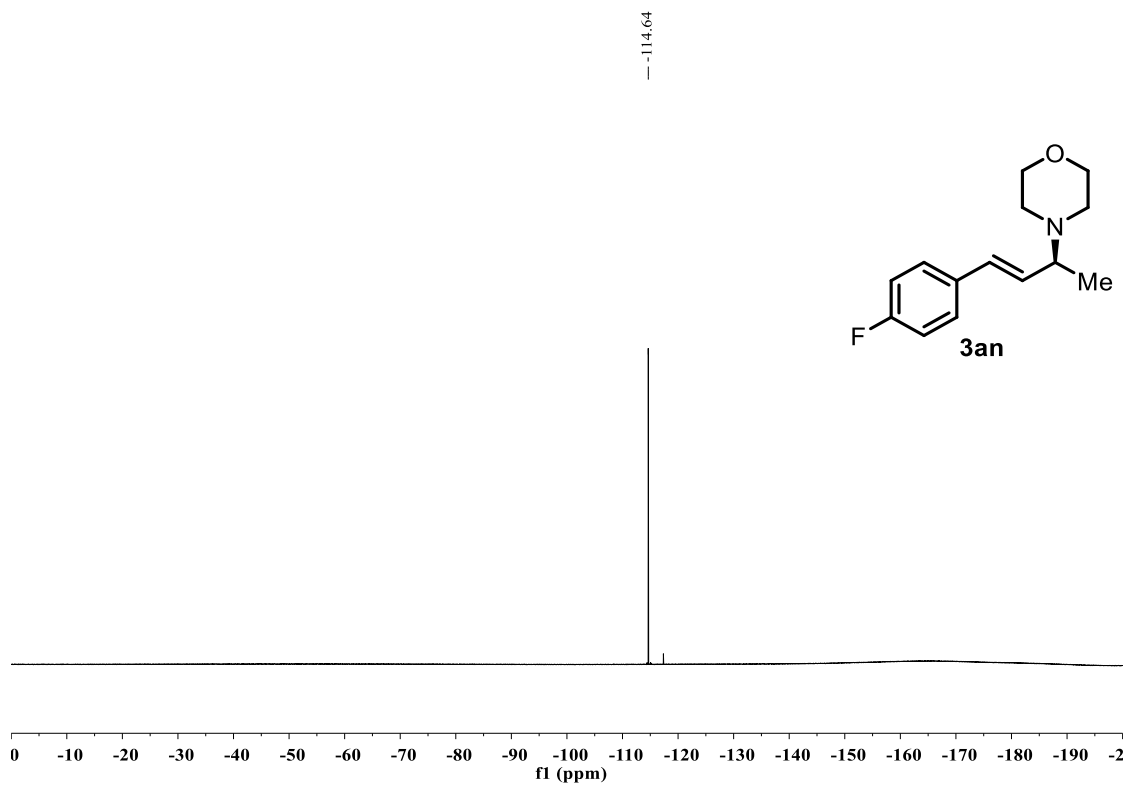

Figure S105.  $^{19}\text{F}$  NMR spectra of **3an**, related to Figure 4.

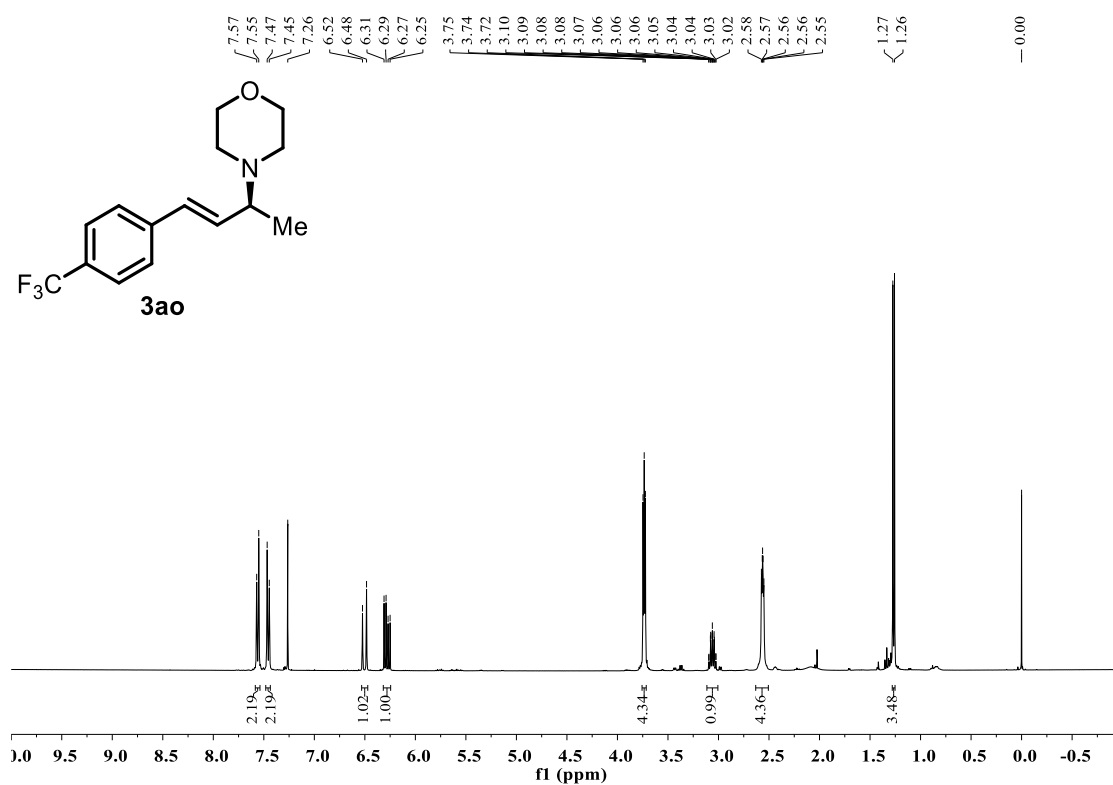

Figure S106.  $^1\text{H}$  NMR spectra of **3ao**, related to Figure 4.

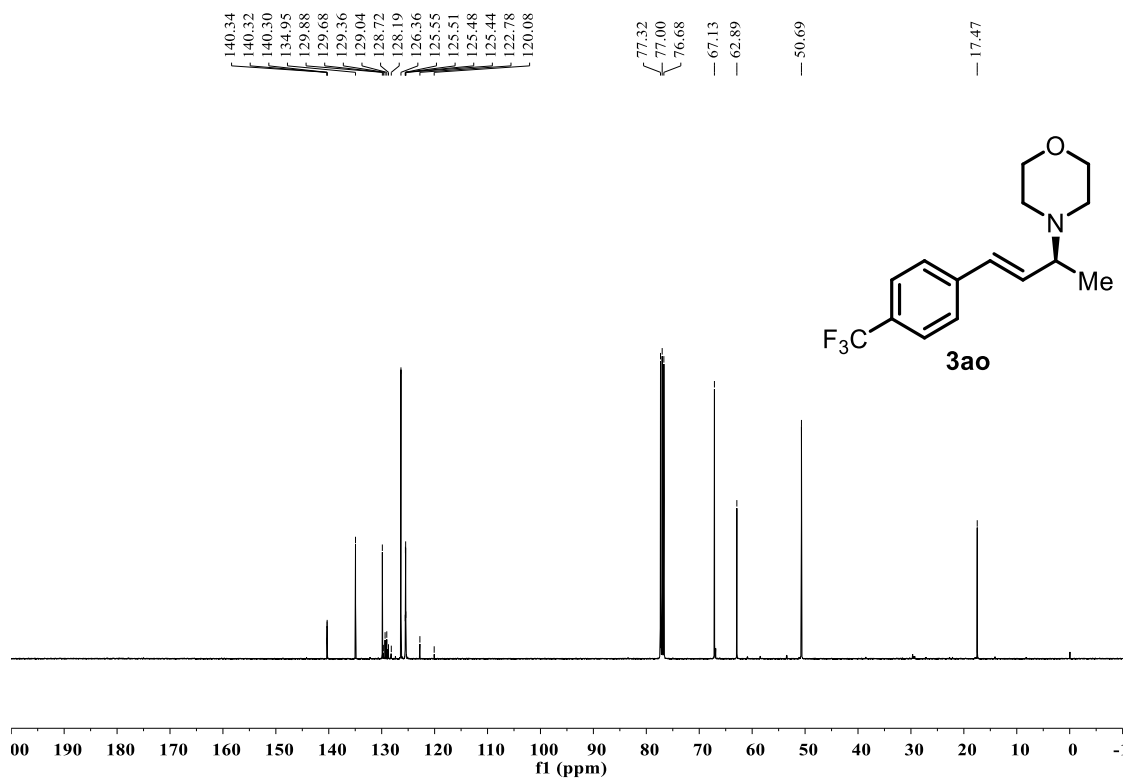

**Figure S107.** <sup>13</sup>C NMR spectra of **3ao**, related to **Figure 4**.

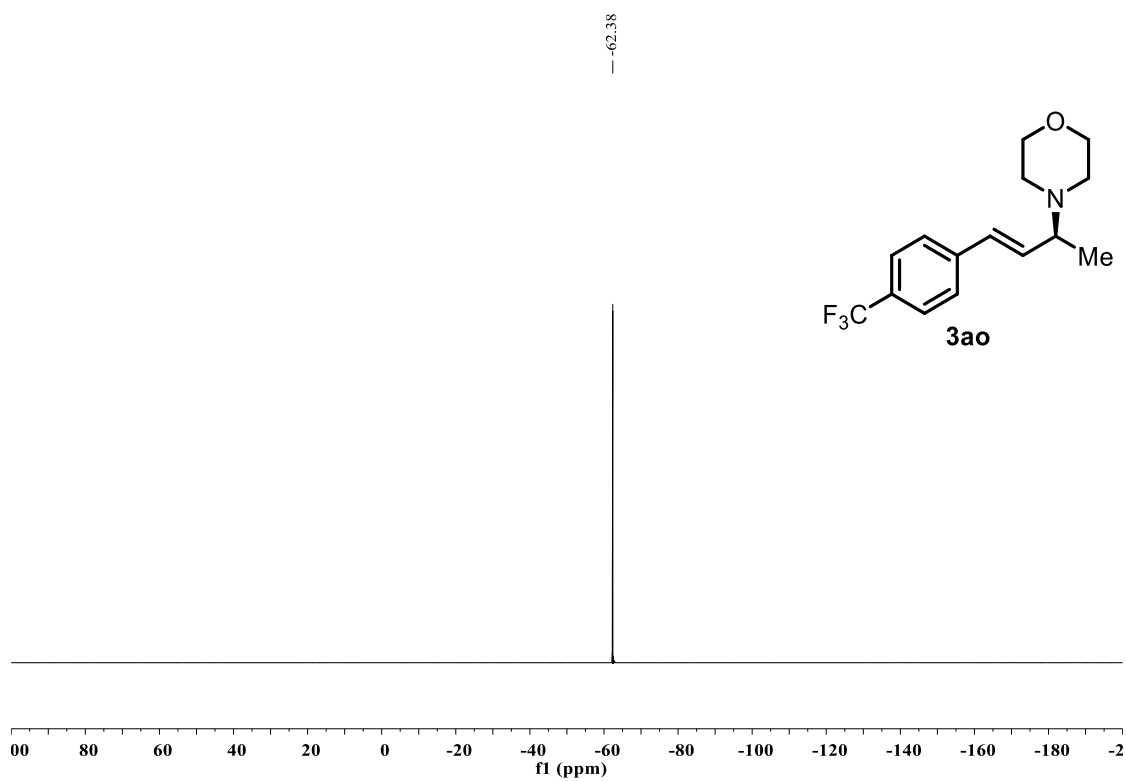

**Figure S108.** <sup>19</sup>F NMR spectra of **3ao**, related to **Figure 4**.

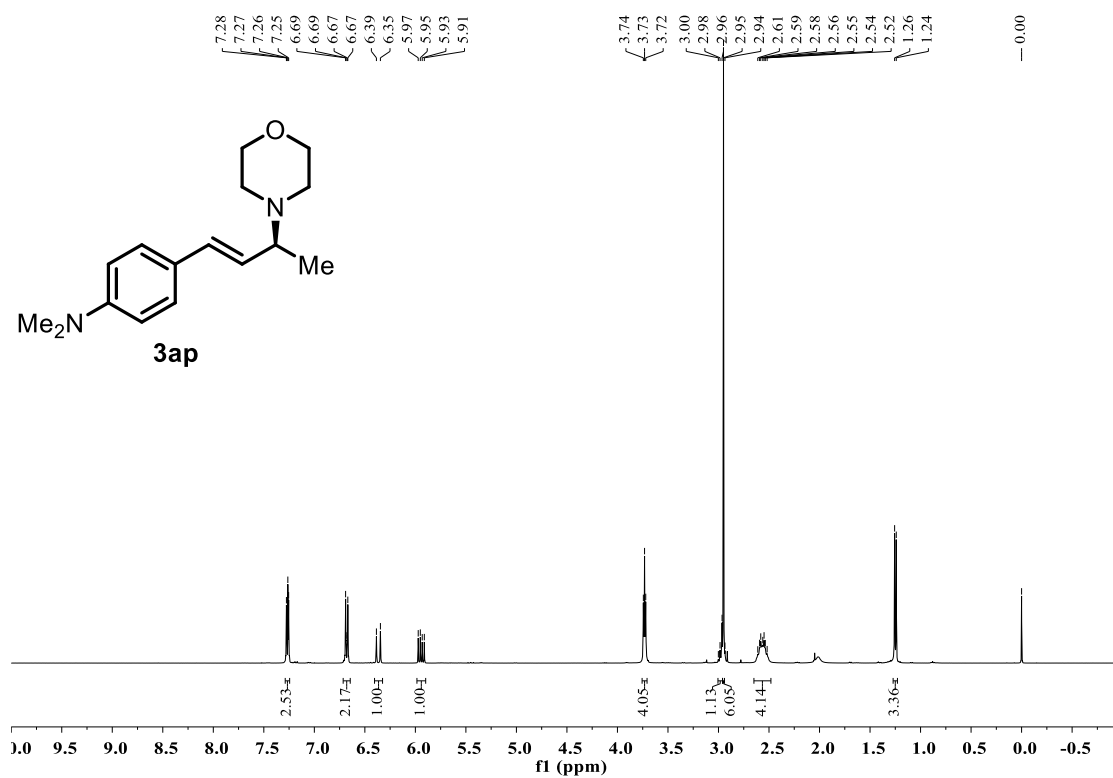

Figure S109. <sup>1</sup>H NMR spectra of **3ap**, related to Figure 4.

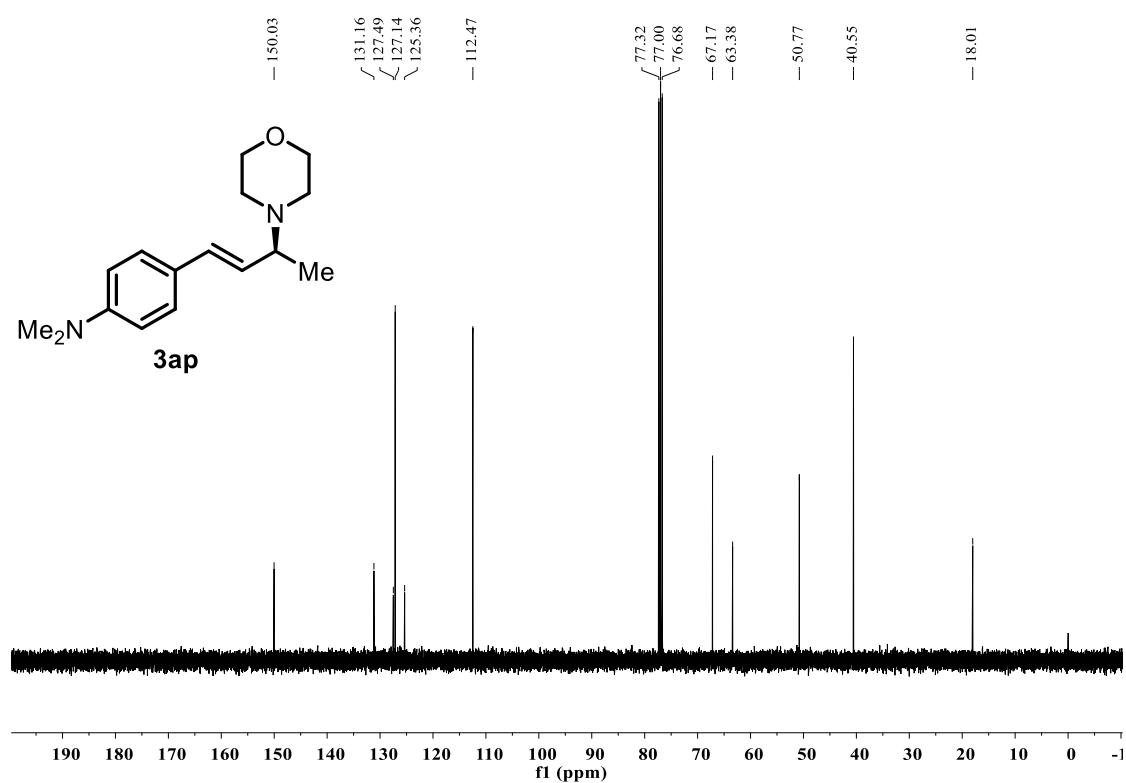

Figure S110. <sup>13</sup>C NMR spectra of **3ap**, related to Figure 4.



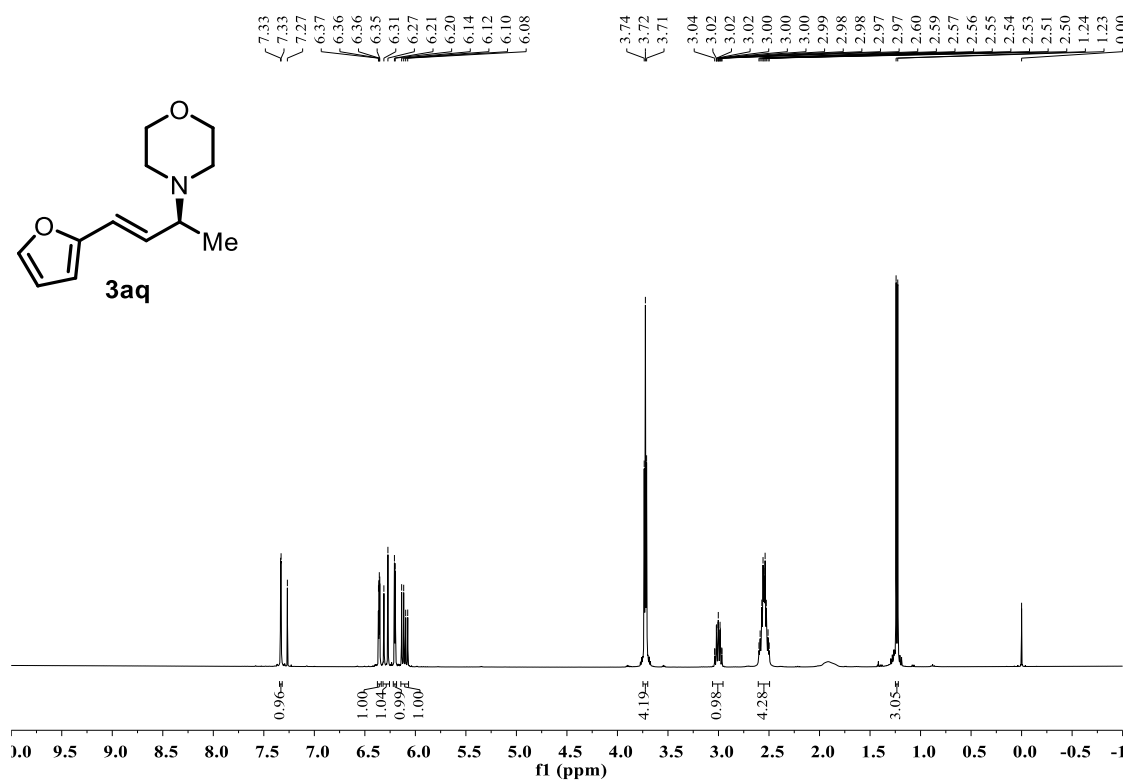

**Figure S111.**  $^1\text{H}$  NMR spectra of **3aq**, related to **Figure 4**.

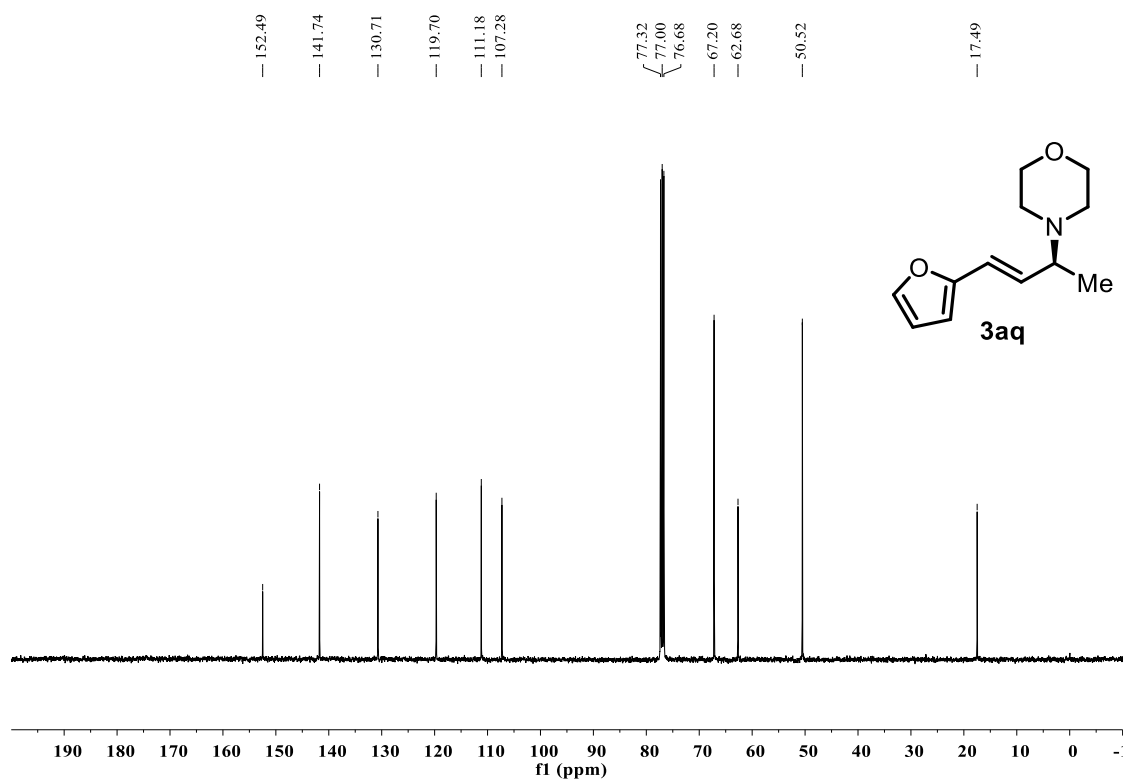

**Figure S112.**  $^{13}\text{C}$  NMR spectra of **3aq**, related to **Figure 4**.

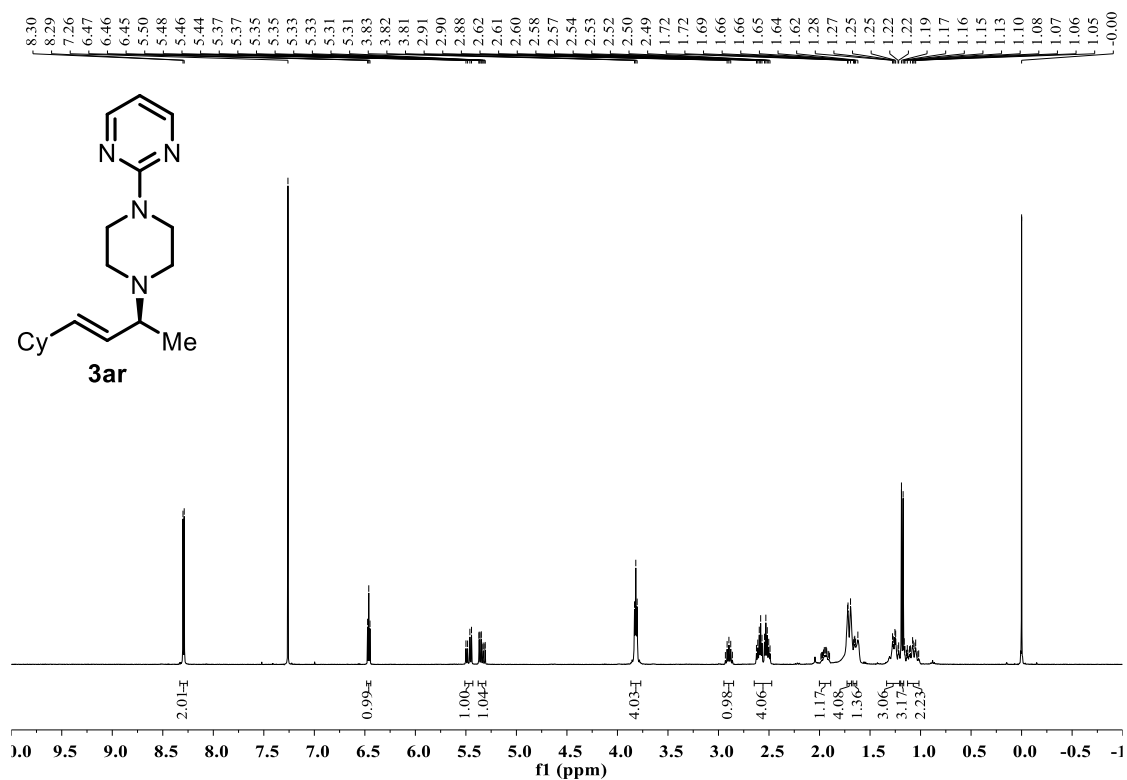

Figure S113. <sup>1</sup>H NMR spectra of **3ar**, related to Figure 4.

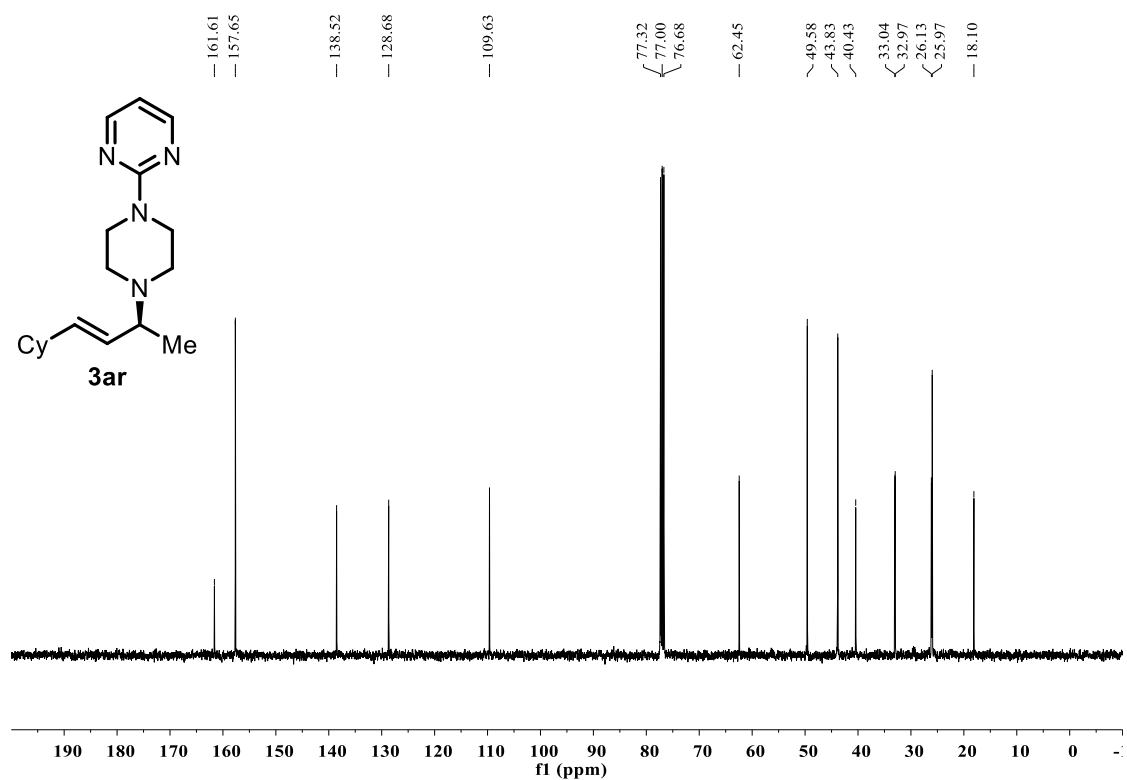

Figure S114. <sup>13</sup>C NMR spectra of **3ar**, related to Figure 4.

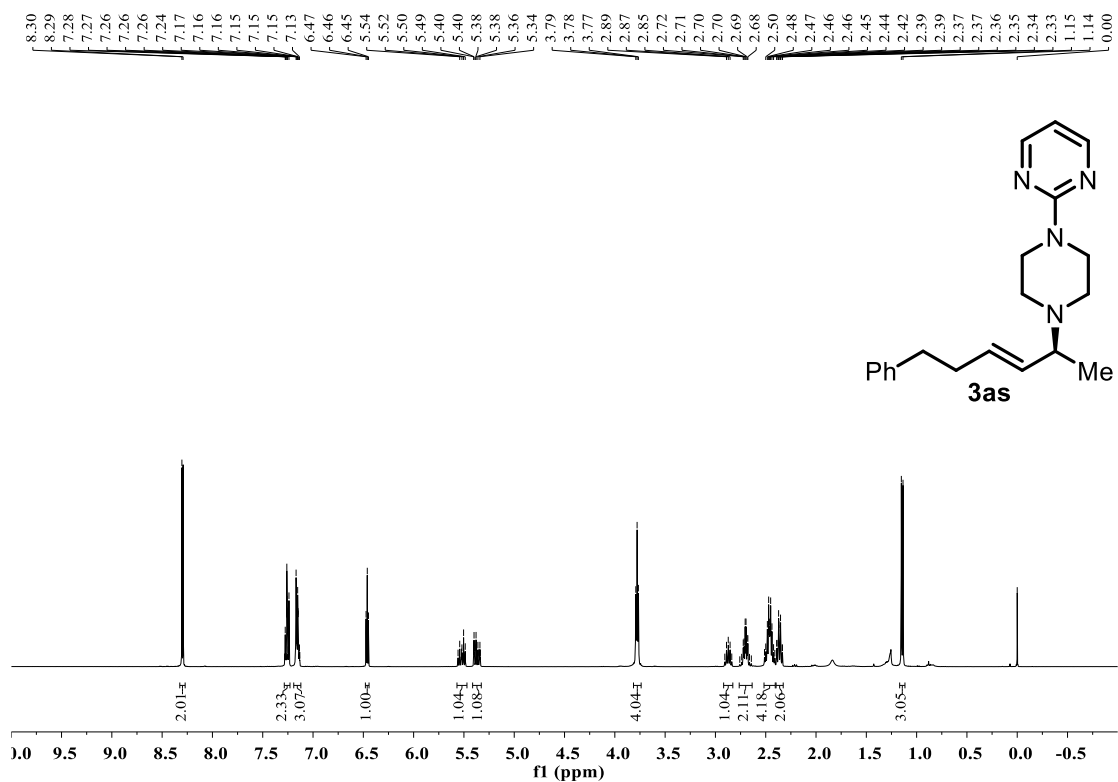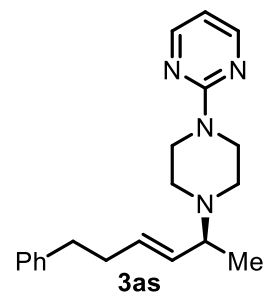

Figure S115. <sup>1</sup>H NMR spectra of **3as**, related to Figure 4.

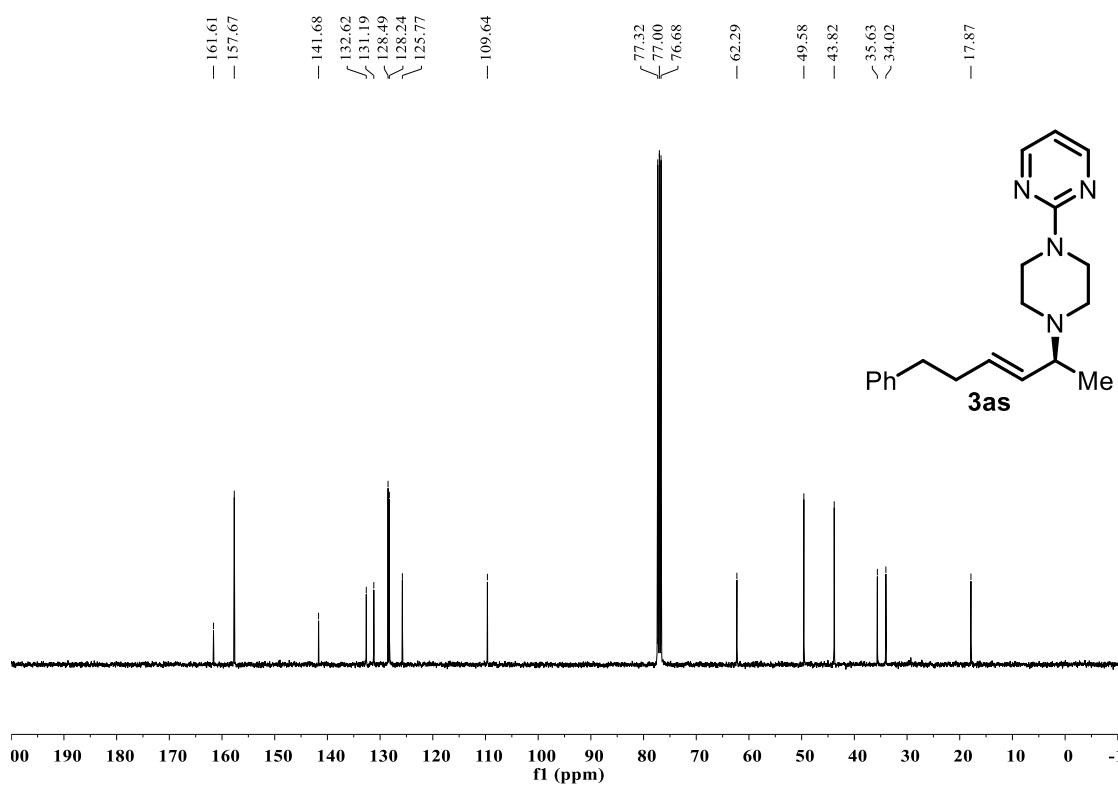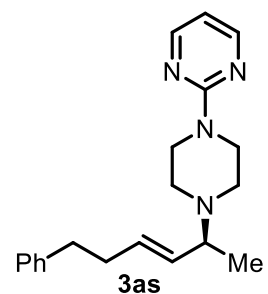

Figure S116. <sup>13</sup>C NMR spectra of **3as**, related to Figure 4.

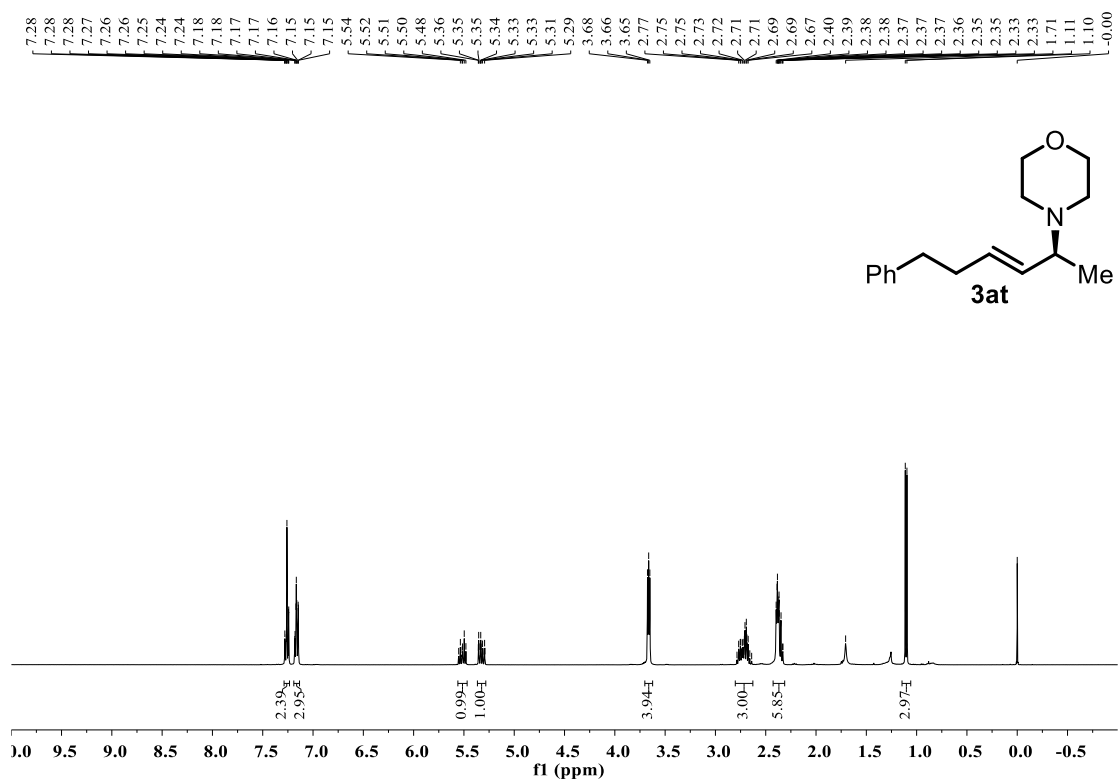

Figure S117. <sup>1</sup>H NMR spectra of **3at**, related to Figure 4.

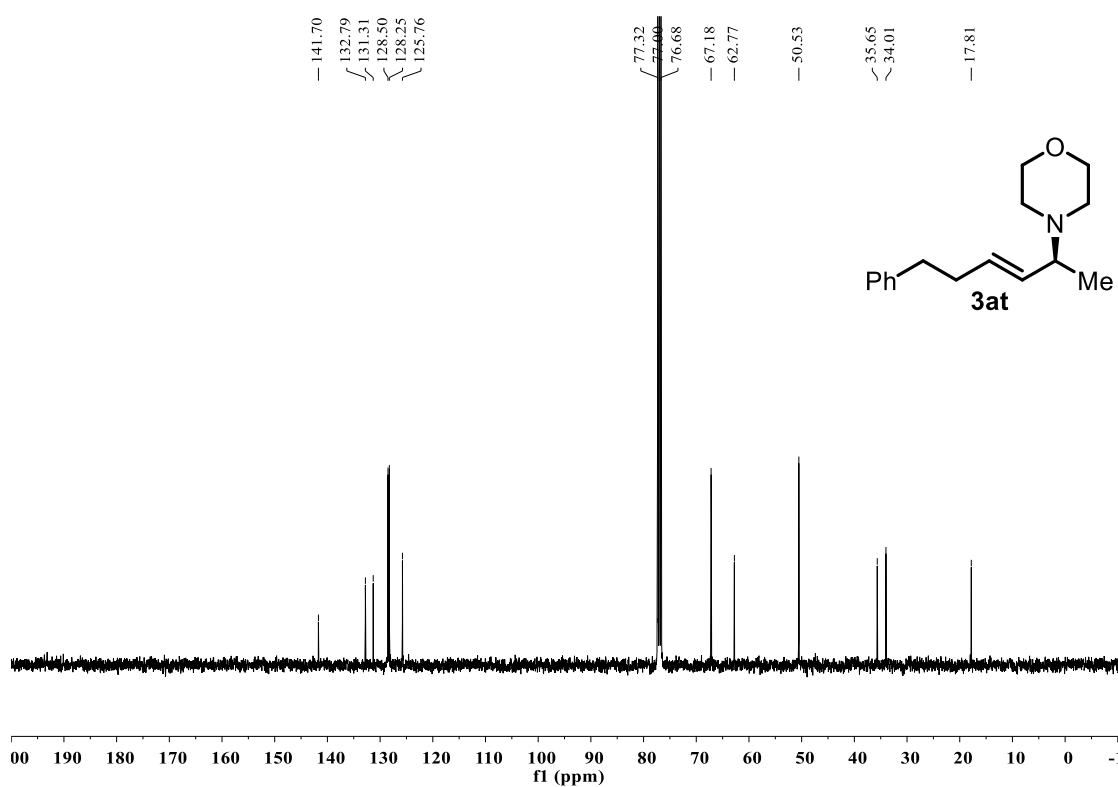

Figure S118. <sup>13</sup>C NMR spectra of **3at**, related to Figure 4.

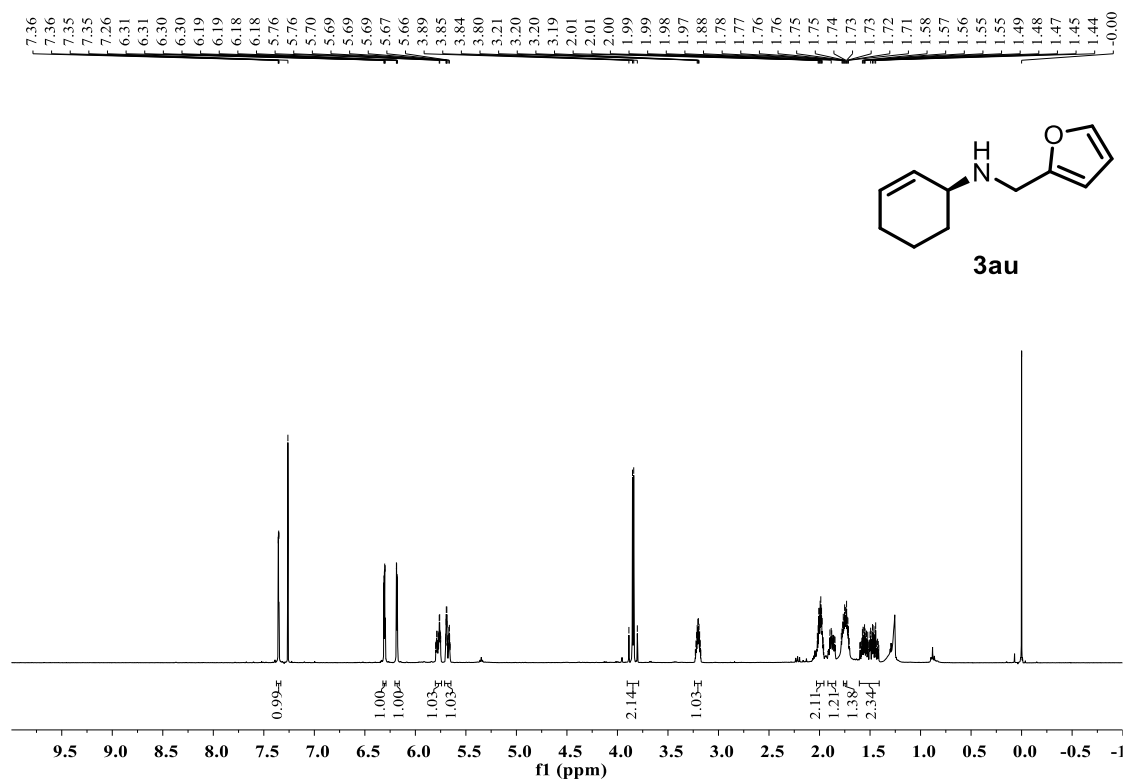

Figure S119. <sup>1</sup>H NMR spectra of **3au**, related to Figure 4.

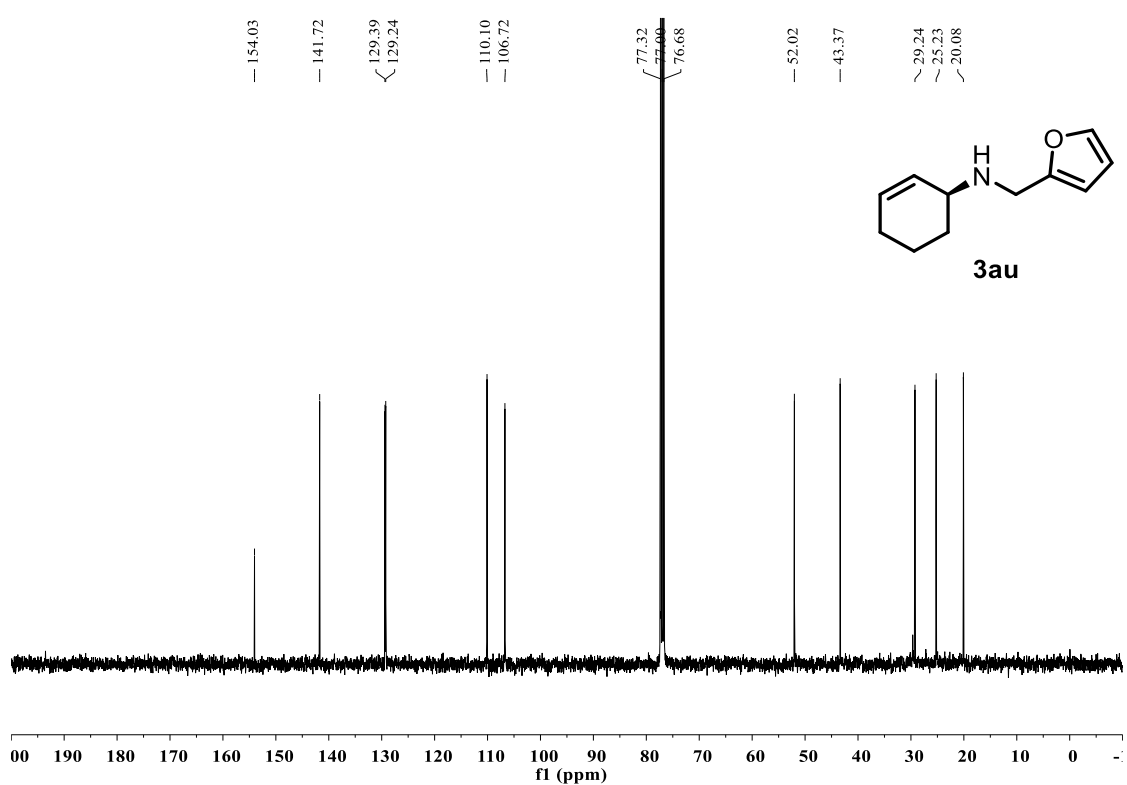

Figure S120. <sup>13</sup>C NMR spectra of **3au**, related to Figure 4.

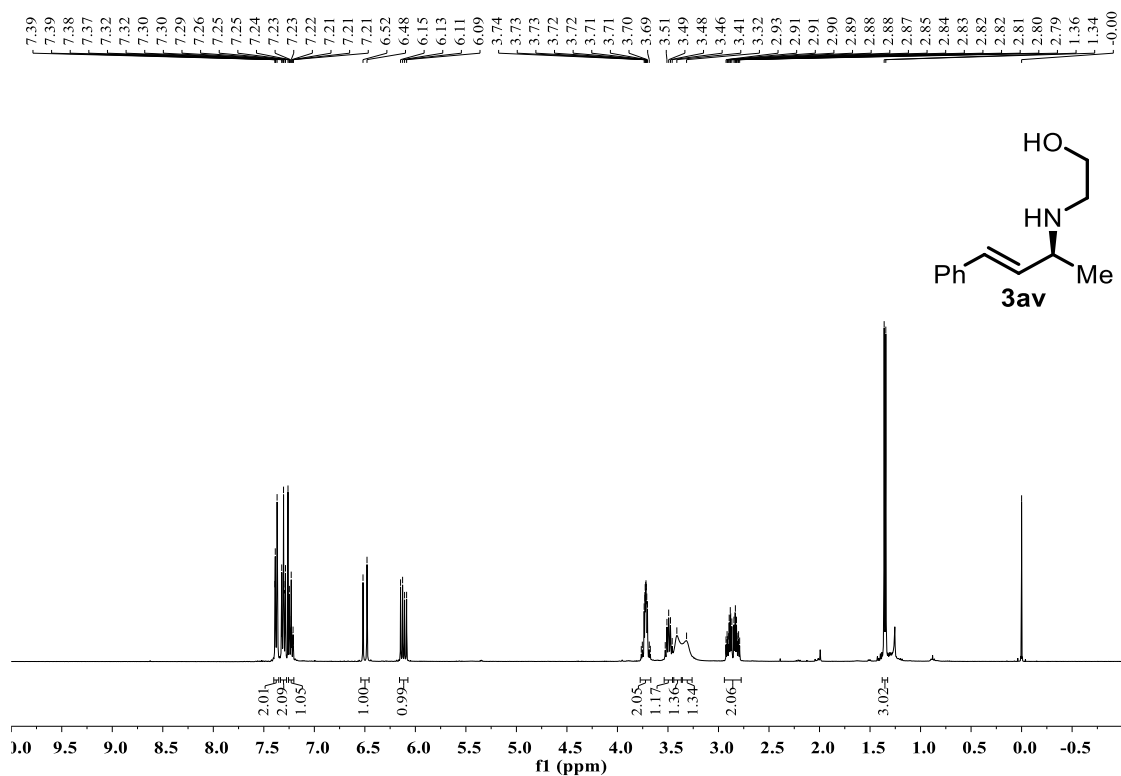

Figure S121. <sup>1</sup>H NMR spectra of **3av**, related to Figure 5.

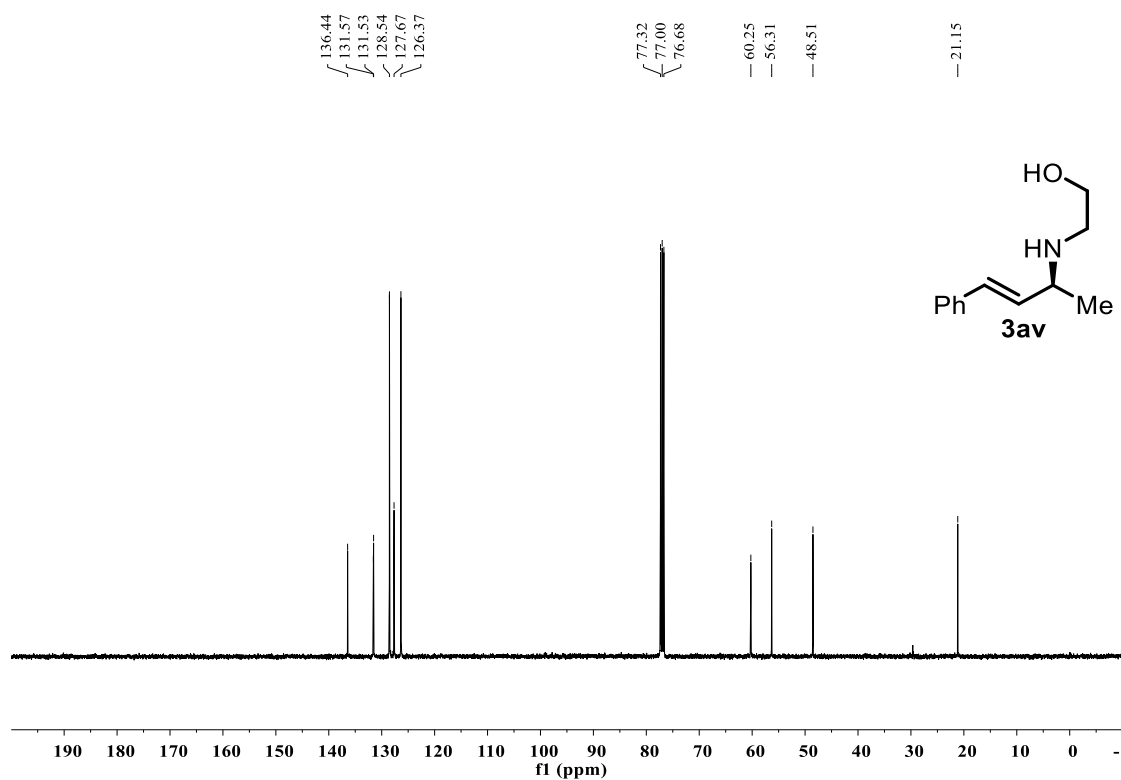

Figure S122. <sup>13</sup>C NMR spectra of **3av**, related to Figure 5.

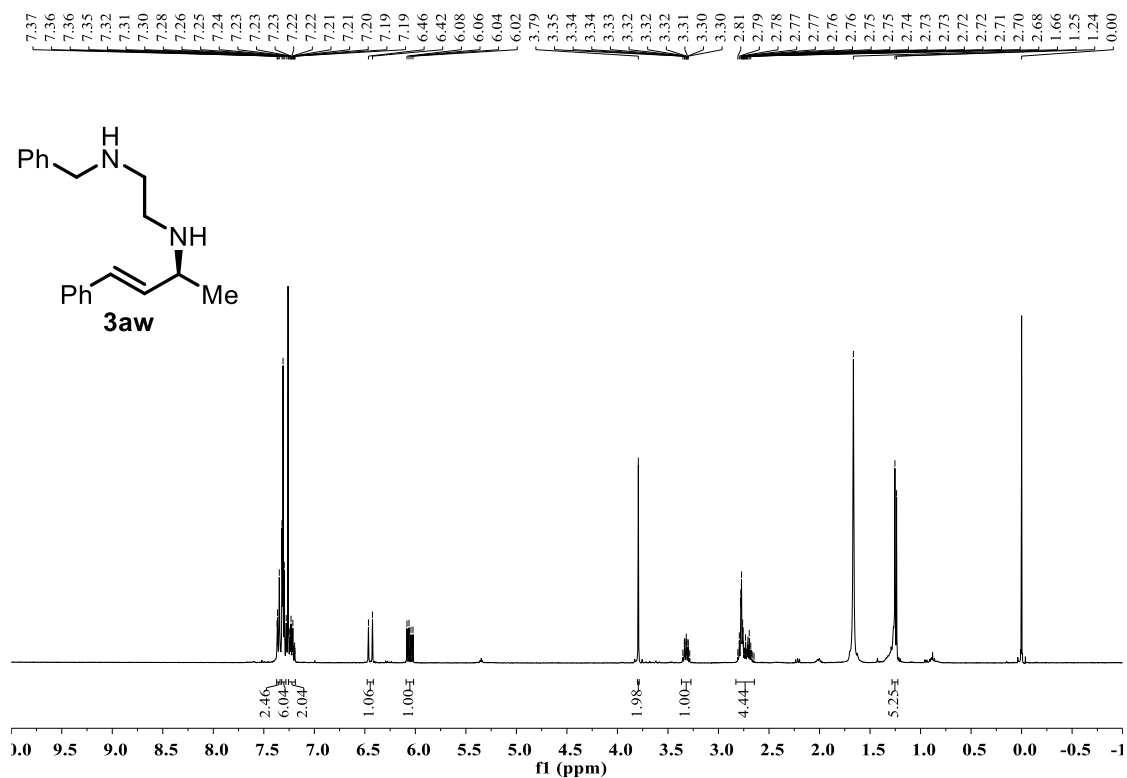

Figure S123. <sup>1</sup>H NMR spectra of **3aw**, related to Figure 5.

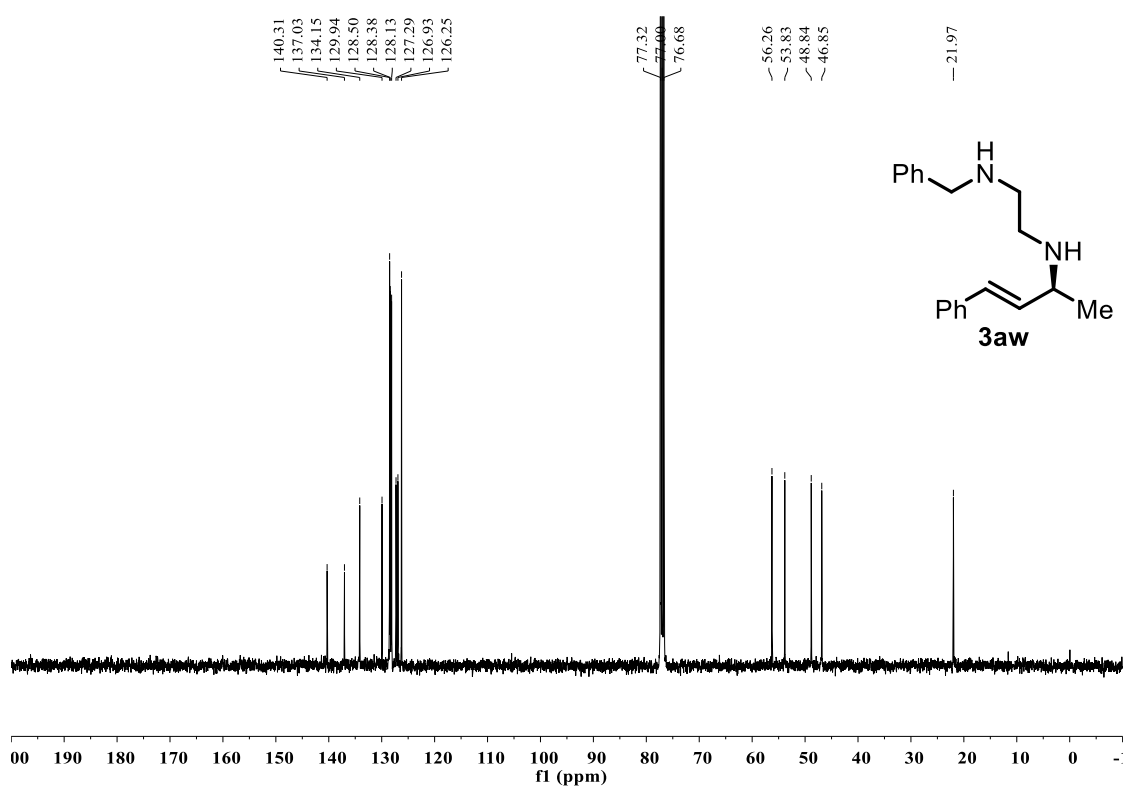

Figure S124. <sup>13</sup>C NMR spectra of **3aw**, related to Figure 5.

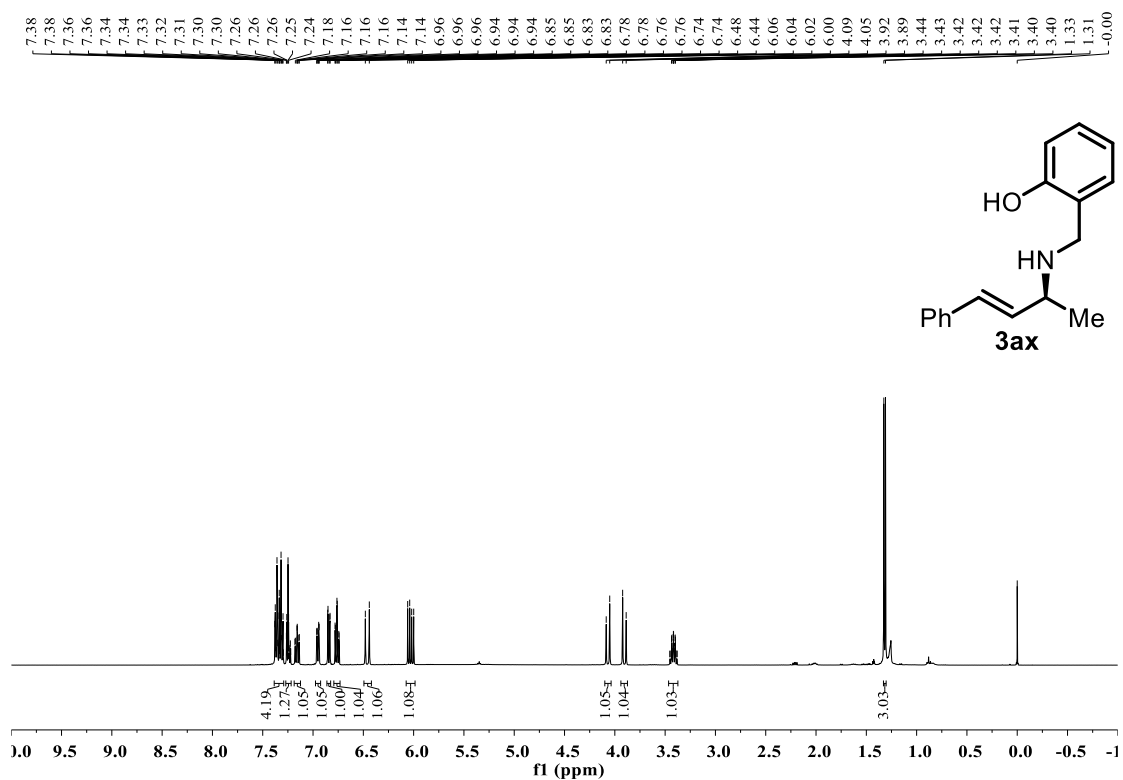

Figure S125. <sup>1</sup>H NMR spectra of **3ax**, related to Figure 5.

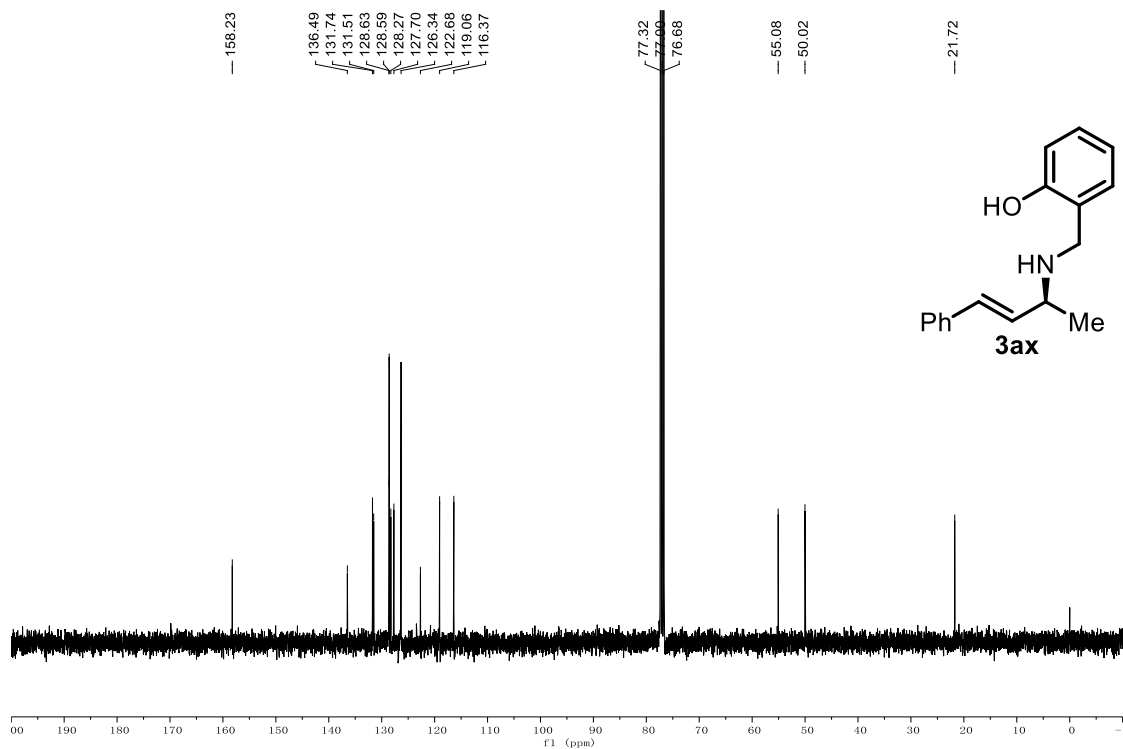

Figure S126. <sup>13</sup>C NMR spectra of **3ax**, related to Figure 5.



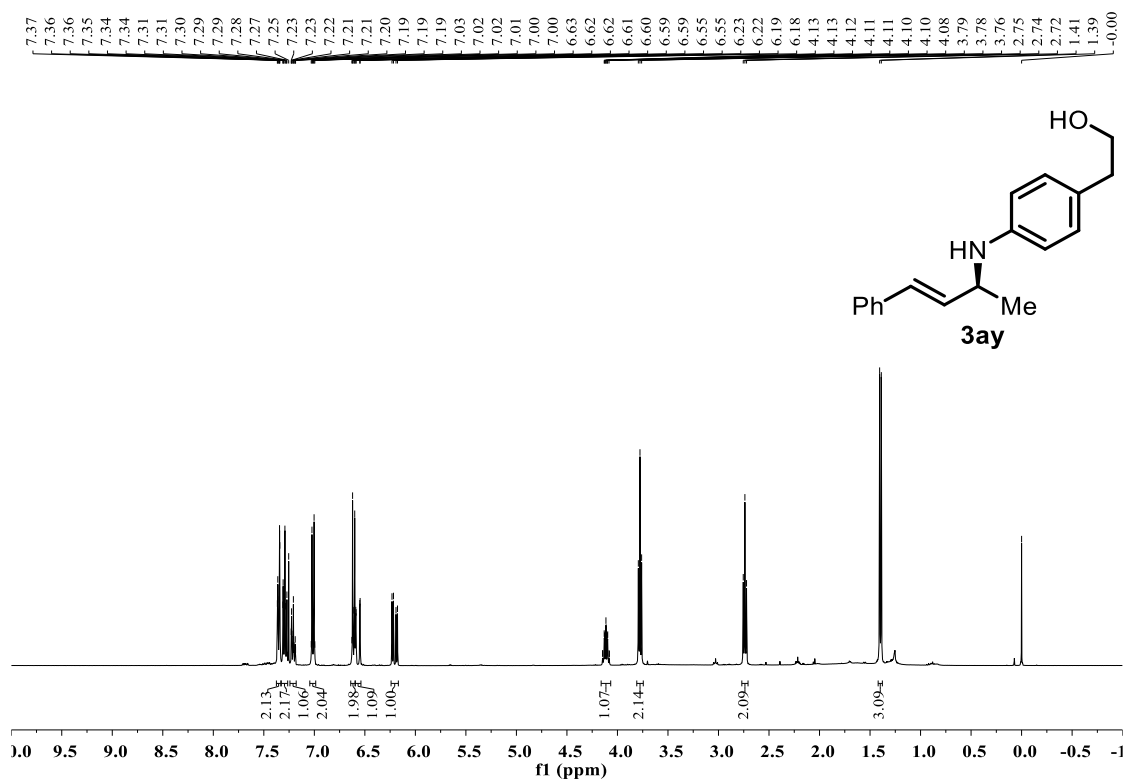

Figure S127. <sup>1</sup>H NMR spectra of **3ay**, related to Figure 5.

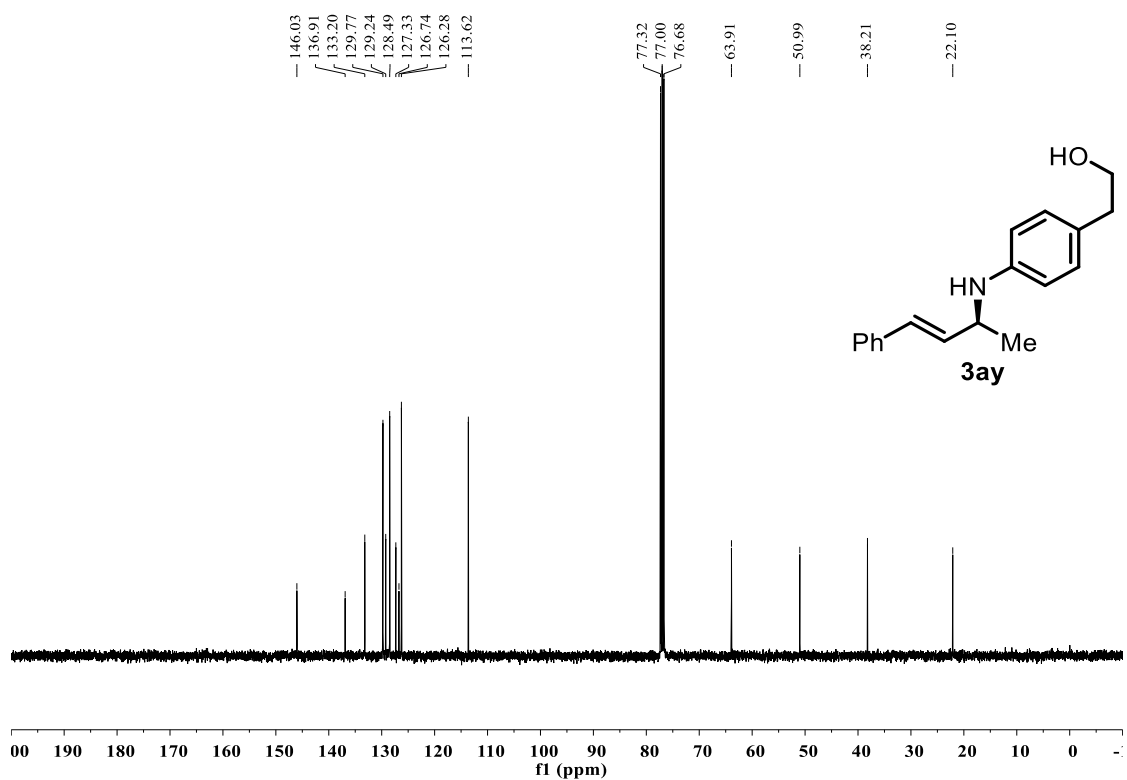

Figure S128. <sup>13</sup>C NMR spectra of **3ay**, related to Figure 5.

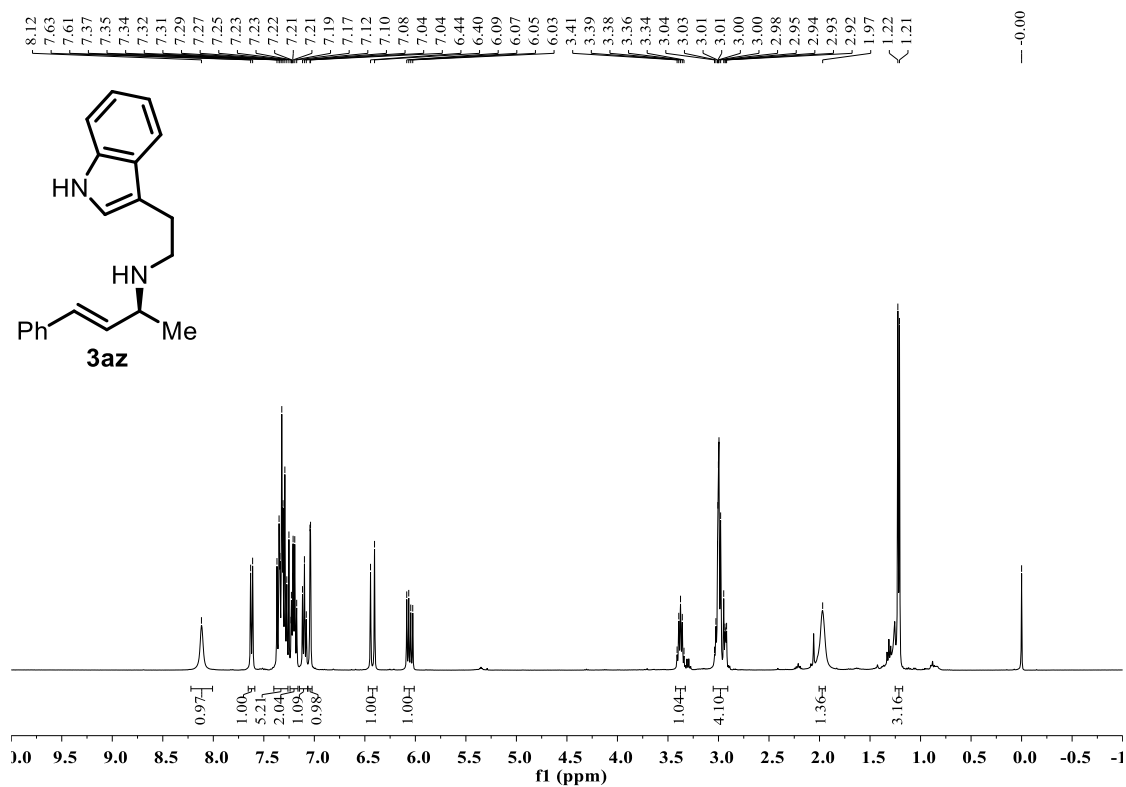

Figure S129. <sup>1</sup>H NMR spectra of **3az**, related to Figure 5.

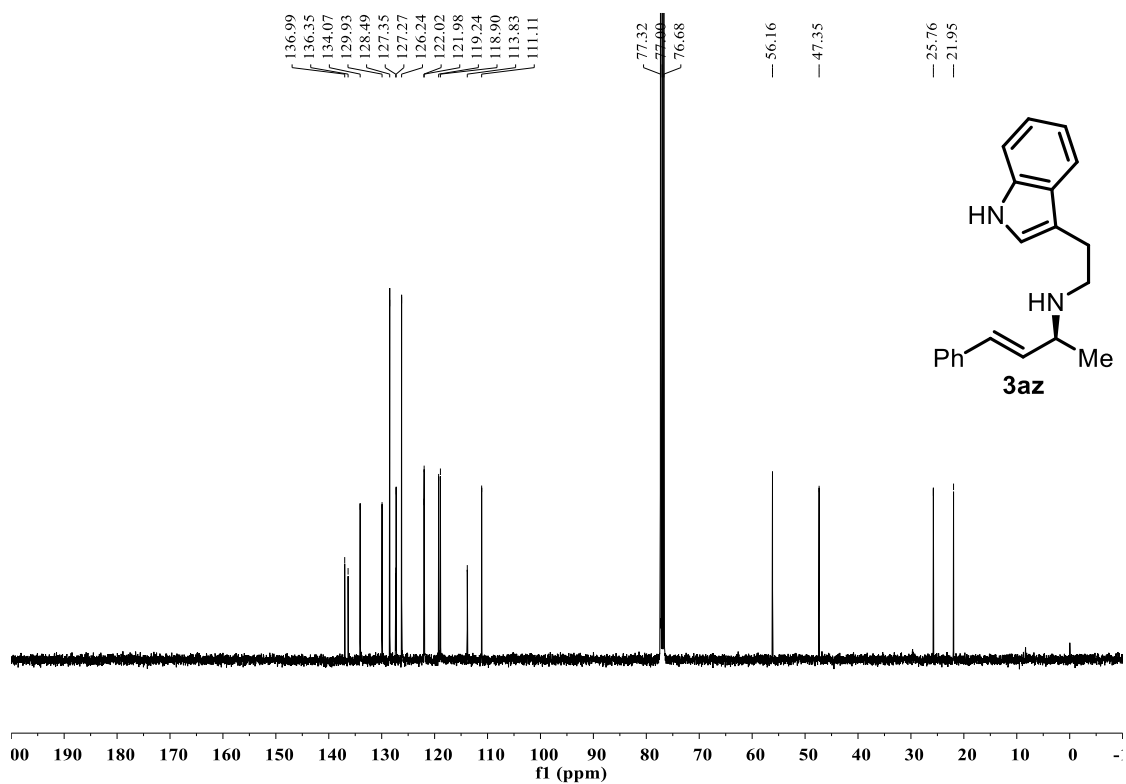

Figure S130. <sup>13</sup>C NMR spectra of **3az**, related to Figure 5.

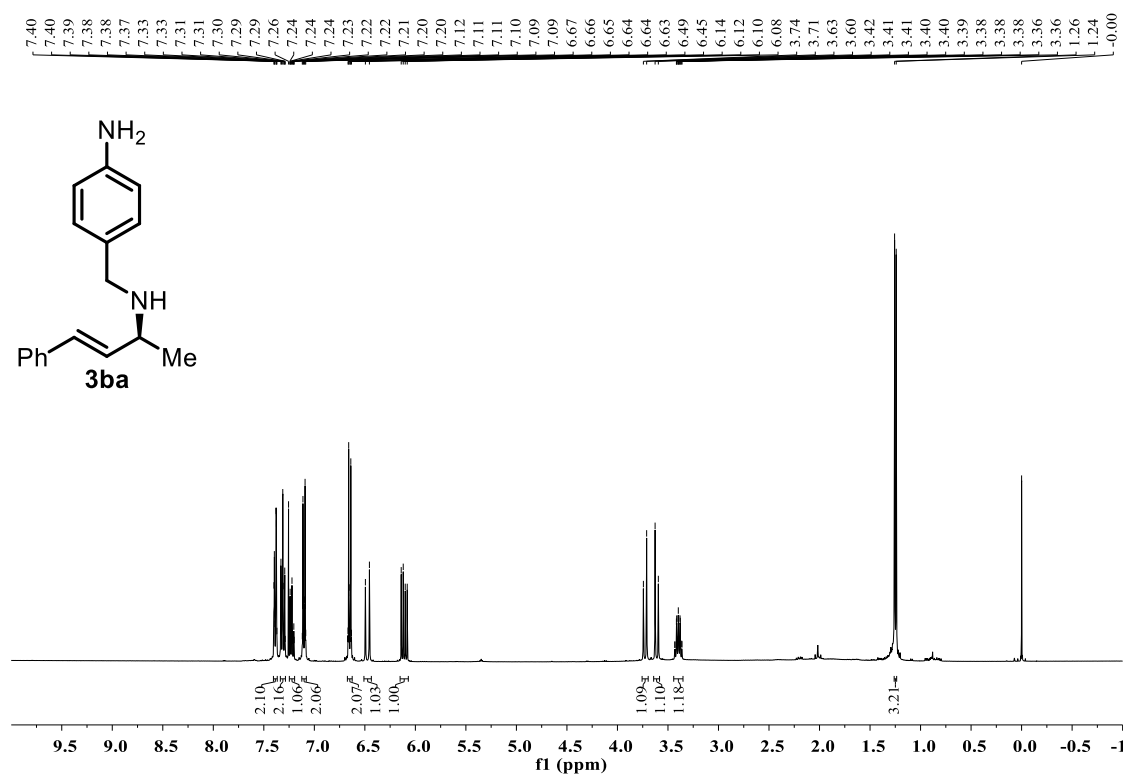

Figure S131. <sup>1</sup>H NMR spectra of **3ba**, related to Figure 5.

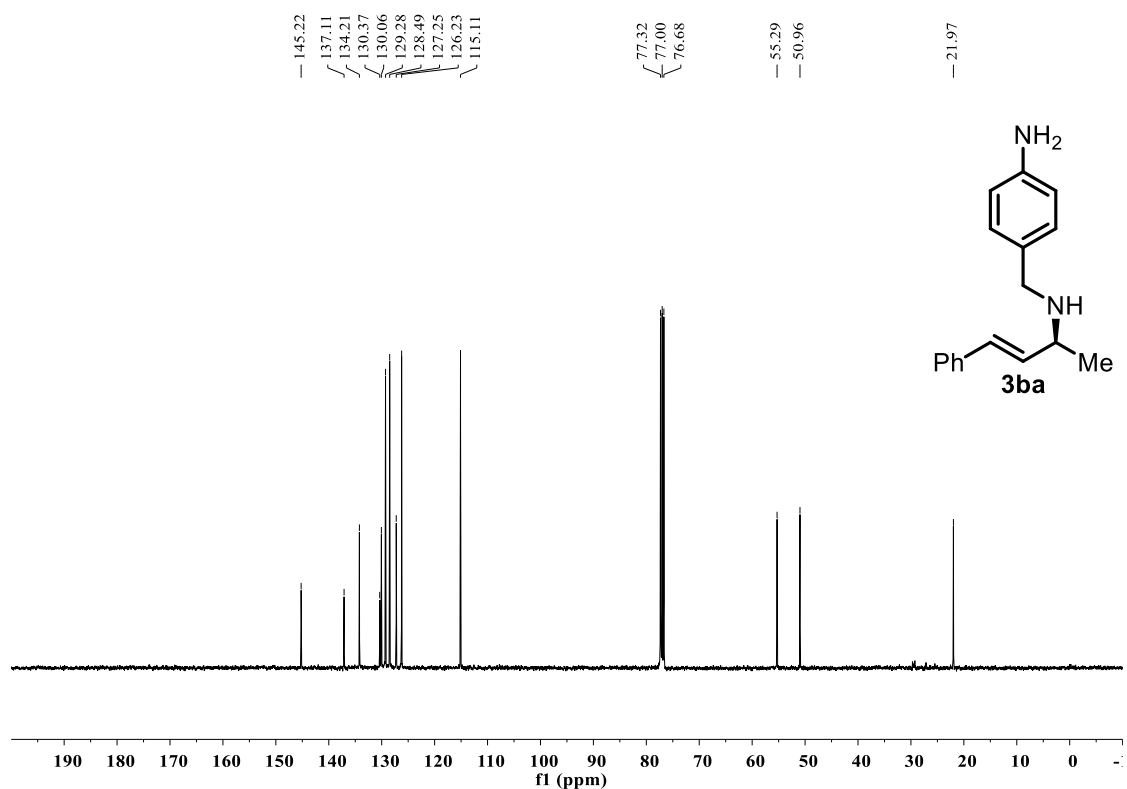

Figure S132. <sup>13</sup>C NMR spectra of **3ba**, related to Figure 5.

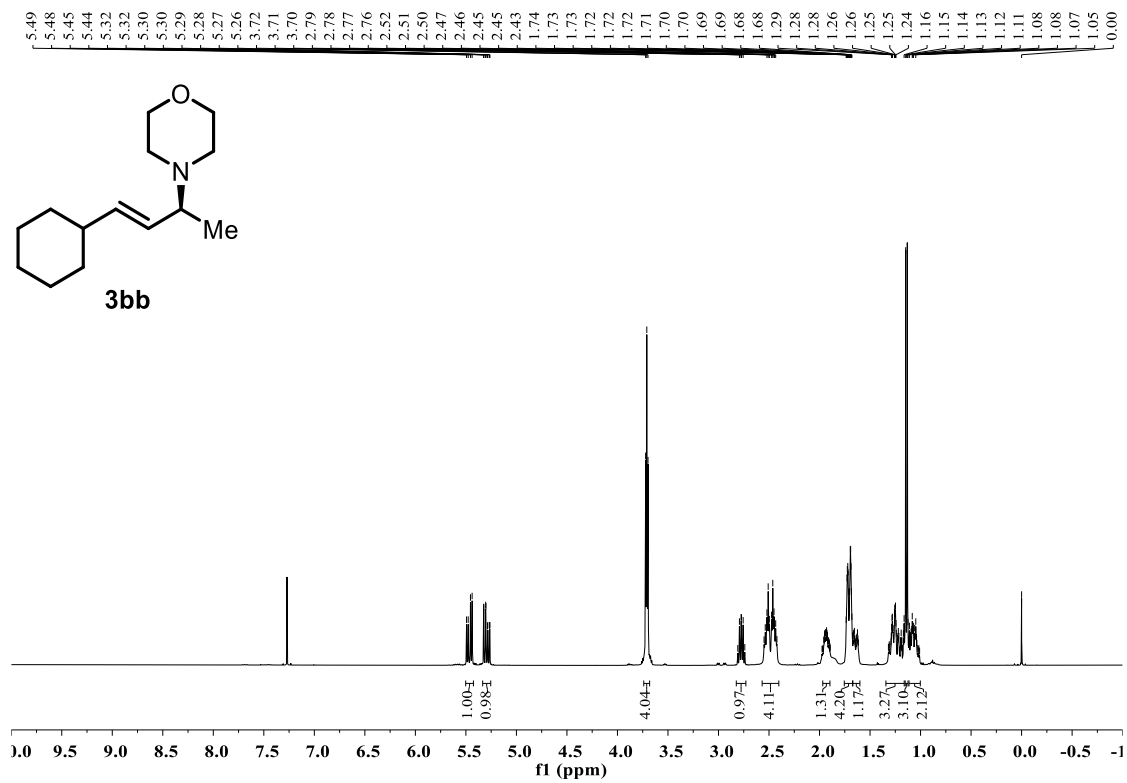

Figure S133. <sup>1</sup>H NMR spectra of **3ba**.

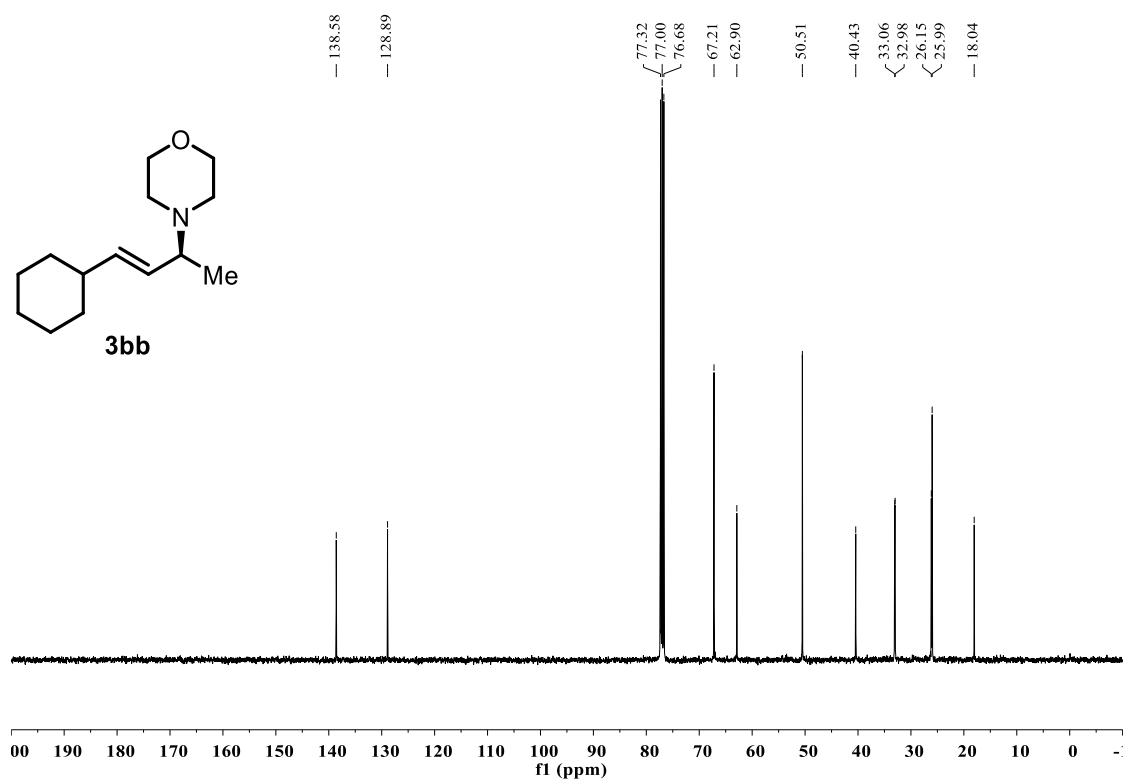

Figure S134. <sup>13</sup>C NMR spectra of **3ba**.

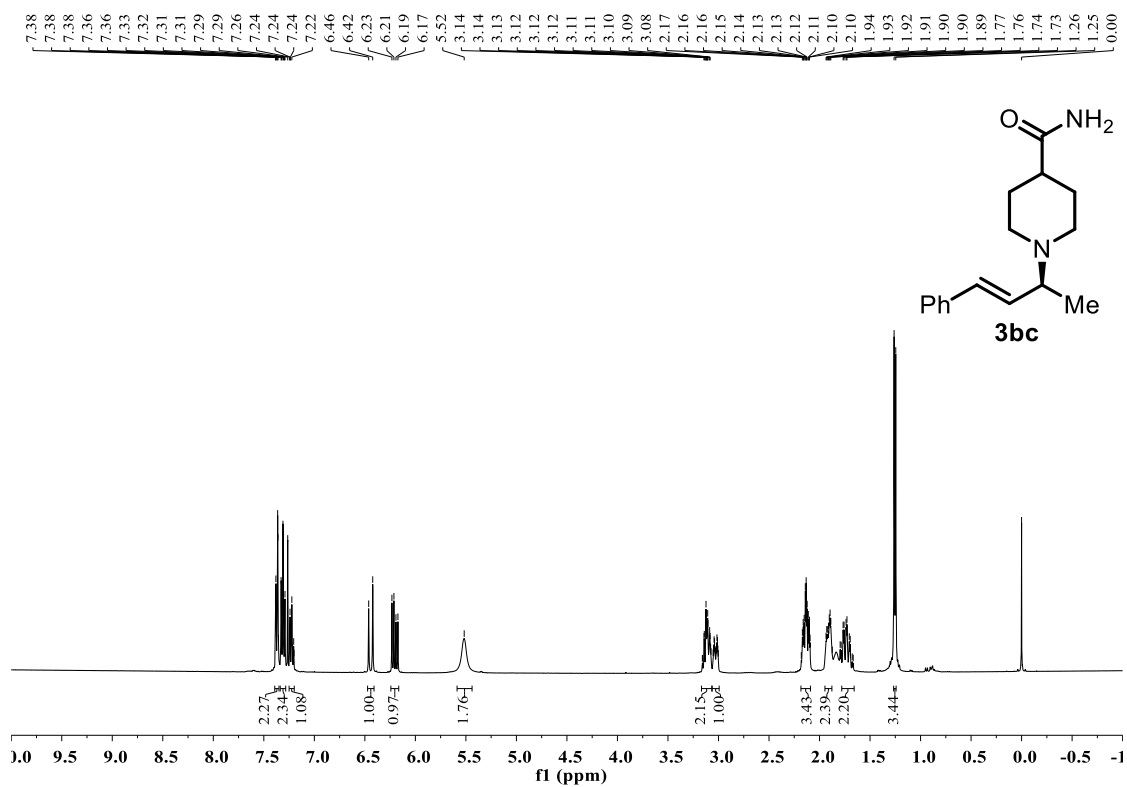

Figure S135. <sup>1</sup>H NMR spectra of **3bc**.

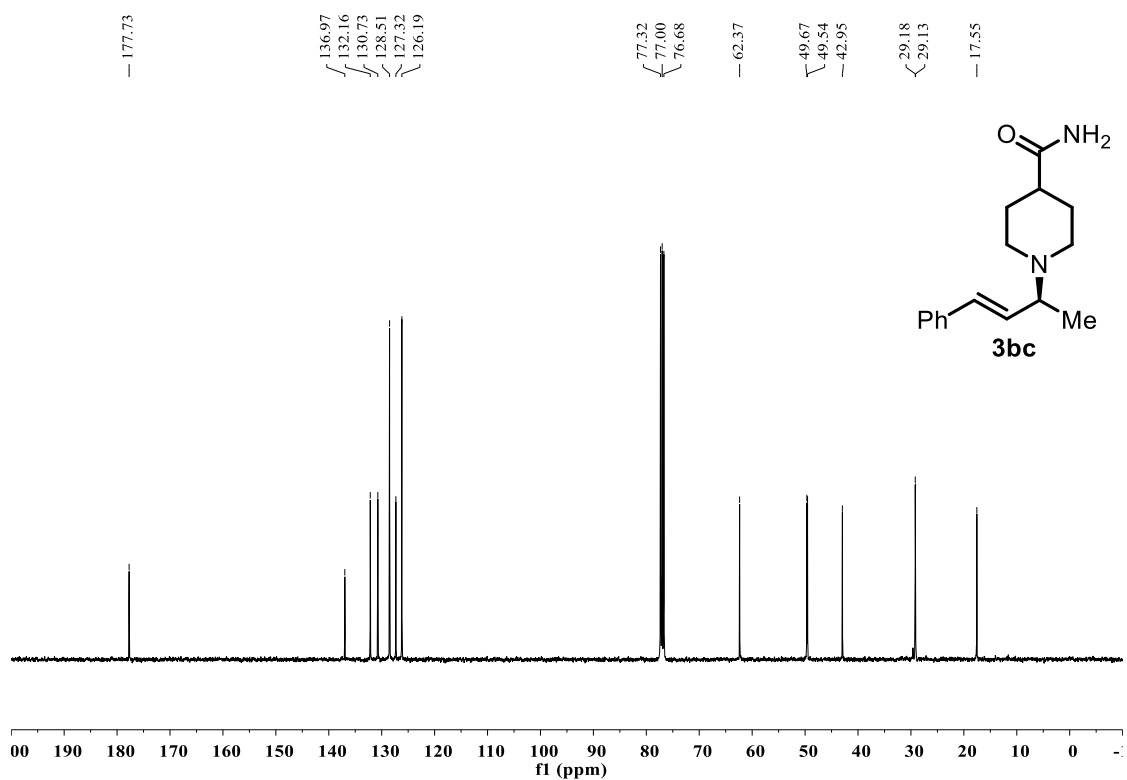

Figure S136. <sup>13</sup>C NMR spectra of **3bc**.

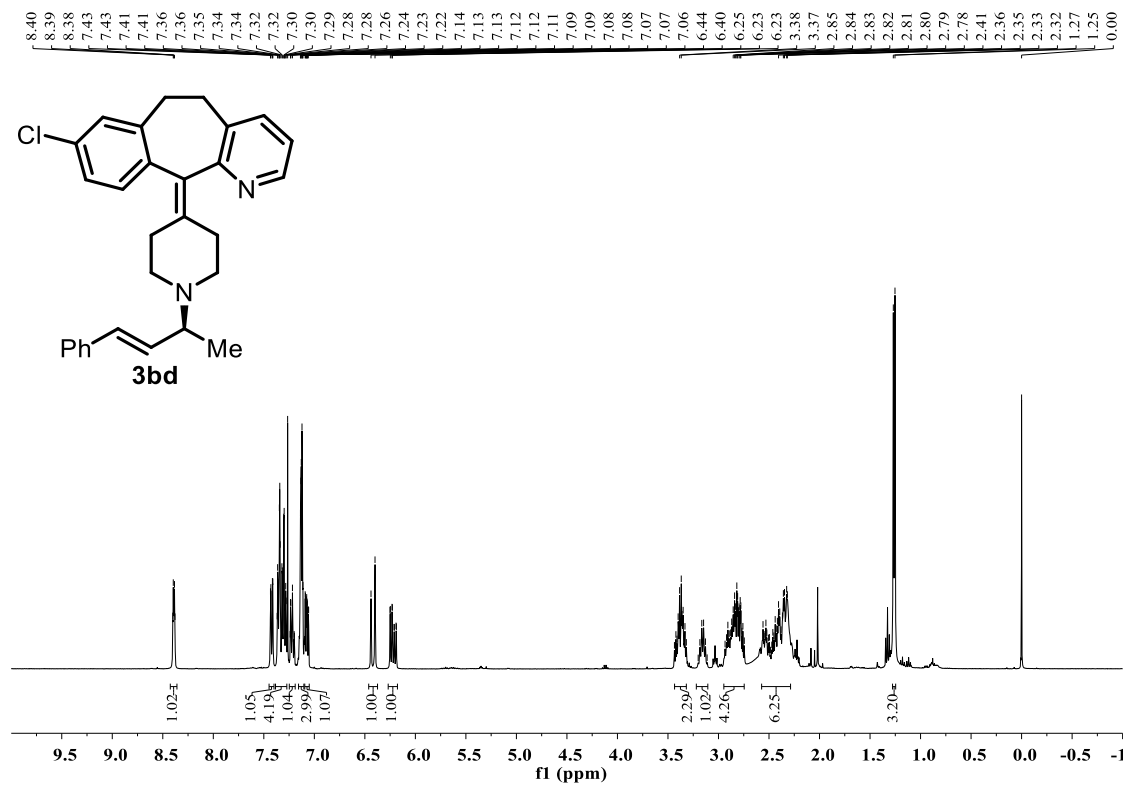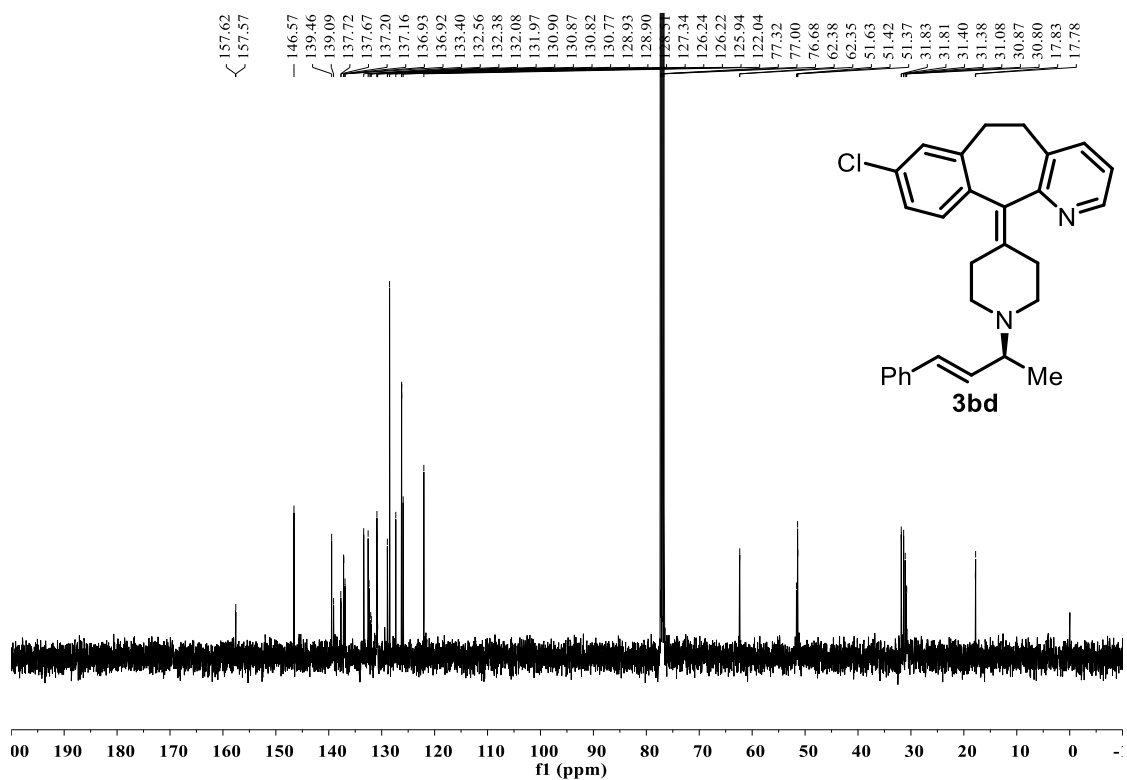

Supplemental figures for  $^1\text{H}$  and  $^2\text{H}$ -NMR spectra of deuterium labeling studies

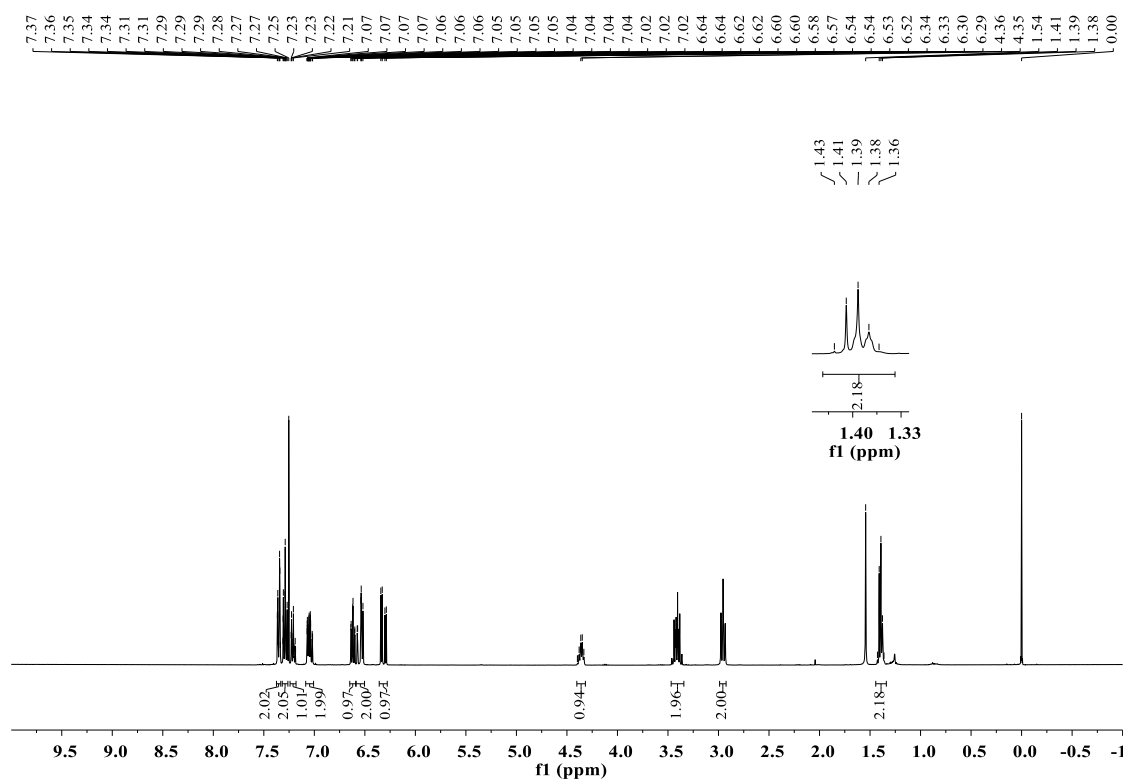

Figure S139.  $^1\text{H}$  NMR spectra of  $d\text{-3t}$ , related to Scheme S7.

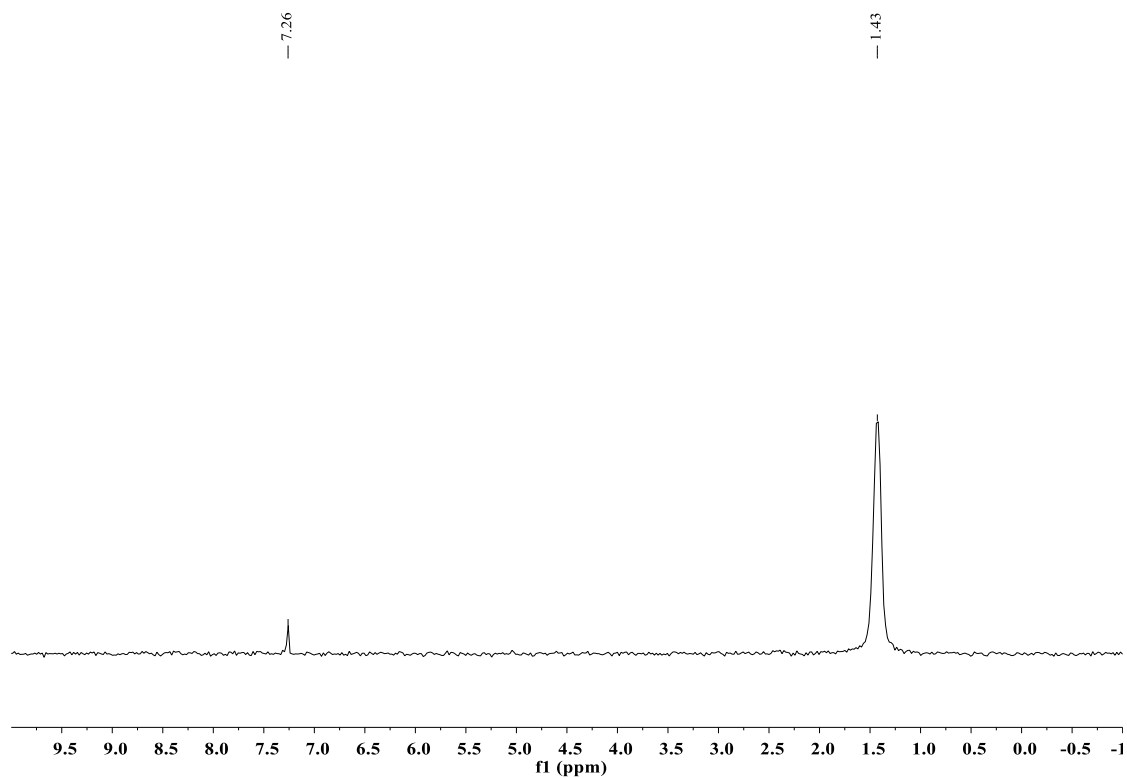

Figure S140.  $^2\text{H}$  NMR spectra of  $d\text{-3t}$ , related to Scheme S7.

## Supplemental Figures for HPLC spectra

Data File D:\DATA\GUAN YUQING\LJ-0306\LJ-0306 2019-03-06 14-33-09\002-0301.D  
Sample Name: LJ-100-7-RAC

```
=====
Acq. Operator   :                               Seq. Line :    3
Acq. Instrument : Instrument 2                   Location  : Vial 2
Injection Date  : 3/6/2019 3:06:17 PM           Inj       :    1
                                                    Inj Volume: 5.000 µl
Acq. Method     : D:\DATA\GUAN YUQING\LJ-0306\LJ-0306 2019-03-06 14-33-09\DAD-OD(1-2)-90-10-0
                  .SML-SUL-ALL-20MIN.M
Last changed    : 1/20/2019 9:58:06 PM
Analysis Method : D:\METHOD\GUAN YUQING\LONGJIAO\DAD-OD(1-2)-95-5-1ML-SUL-ALL-20MIN.M
Last changed    : 3/6/2019 3:50:27 PM
                  (modified after loading)
Additional Info : Peak(s) manually integrated
=====
```

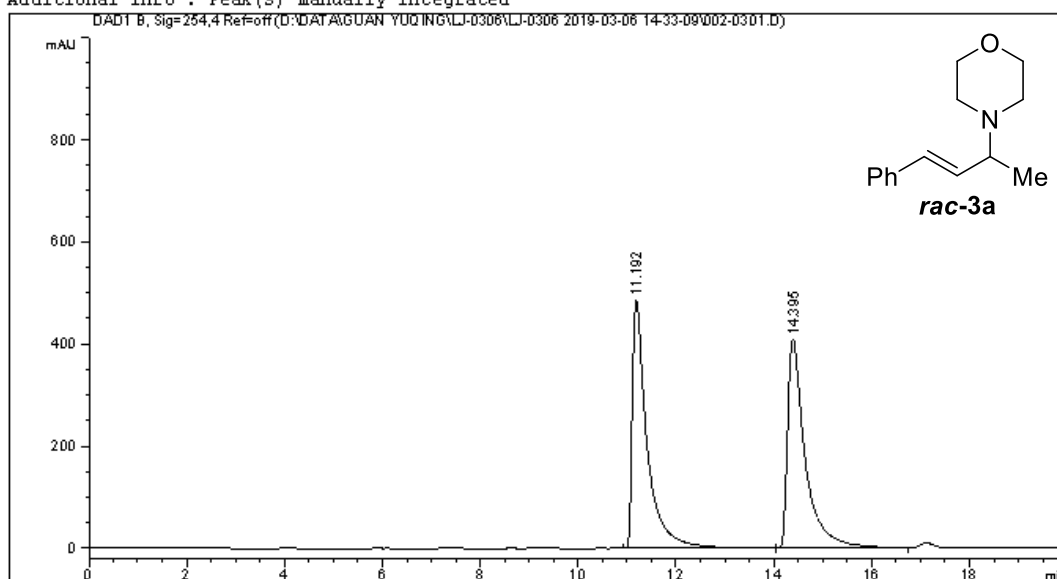

### Area Percent Report

```
=====
Sorted By      :      Signal
Multiplier     :      1.0000
Dilution       :      1.0000
Use Multiplier & Dilution Factor with ISTDs
=====
```

Signal 1: DAD1 B, Sig=254,4 Ref=off

| Peak # | RetTime [min] | Type | Width [min] | Area [mAU*s] | Height [mAU] | Area %  |
|--------|---------------|------|-------------|--------------|--------------|---------|
| 1      | 11.192        | BB   | 0.3028      | 1.02861e4    | 486.24136    | 50.2351 |
| 2      | 14.395        | BB   | 0.3613      | 1.01898e4    | 408.17218    | 49.7649 |

Totals :                                    2.04759e4    894.41354

Figure S141. HPLC spectra of *rac-3a*, related to Figure 3.



Data File D:\DATA\GUAN YUQING\LJ-0306\LJ-0306 2019-03-06 14-33-09\001-0201.D  
Sample Name: LJ-100-7

```
=====
Acq. Operator   :                               Seq. Line :    2
Acq. Instrument : Instrument 2                   Location  : Vial 1
Injection Date  : 3/6/2019 2:45:19 PM           Inj       :    1
                                                    Inj Volume: 5.000 µl
Acq. Method     : D:\DATA\GUAN YUQING\LJ-0306\2019-03-06 14-33-09\DAD-OD(1-2)-90-10-0
                  .SML-SUL-ALL-20MIN.M
Last changed    : 1/20/2019 9:58:06 PM
Analysis Method : D:\METHOD\GUAN YUQING\LONGJIAO\DAD-OD(1-2)-95-5-1ML-SUL-ALL-20MIN.M
Last changed    : 3/6/2019 3:56:51 PM
                  (modified after loading)
Additional Info  : Peak(s) manually integrated
=====
```

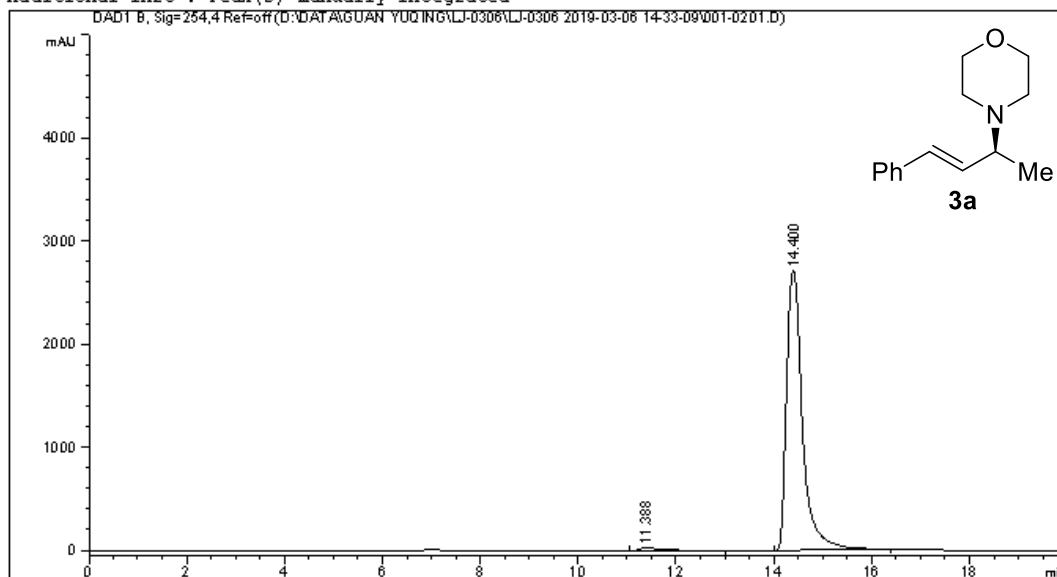

=====  
Area Percent Report  
=====

```
Sorted By      :      Signal
Multiplier     :      1.0000
Dilution       :      1.0000
Use Multiplier & Dilution Factor with ISTDs
```

Signal 1: DAD1 B, Sig=254,4 Ref=off

| Peak # | RetTime [min] | Type | Width [min] | Area [mAU*s] | Height [mAU] | Area %  |
|--------|---------------|------|-------------|--------------|--------------|---------|
| 1      | 11.388        | BB   | 0.4032      | 650.96808    | 23.07139     | 1.0541  |
| 2      | 14.400        | BB   | 0.3453      | 6.11045e4    | 2707.21484   | 98.9459 |

Totals :                                   6.17554e4  2730.28624

Figure S142. HPLC spectra of 3a, related to Figure 3.



Data File D:\DATA\LYH\LYH-4-656-RAC\LYH-4-656-RAC-FURAN 2019-04-12 14-40-53\024-2801.D  
Sample Name: LJ-108-7

```
=====
Acq. Operator   :                               Seq. Line :   28
Acq. Instrument : Instrument 1                   Location  : Vial 24
Injection Date  : 4/13/2019 6:39:44 AM          Inj       :    1
                                                    Inj Volume: 5.000 µl
Acq. Method     : D:\DATA\LYH\LYH-4-656-RAC\LYH-4-656-RAC-FURAN 2019-04-12 14-40-53\WVD-AD(1-
                2)-99-1-0.6ML-5UL-254NM-40MIN.M
Last changed    : 3/5/2019 3:34:42 PM
Analysis Method : D:\METHOD\LG\DAD-0J(1-6)-80-20-1ML-5UL-ALL-60MIN.M
Last changed    : 4/14/2019 8:49:14 PM
                (modified after loading)
Additional Info : Peak(s) manually integrated
=====
```

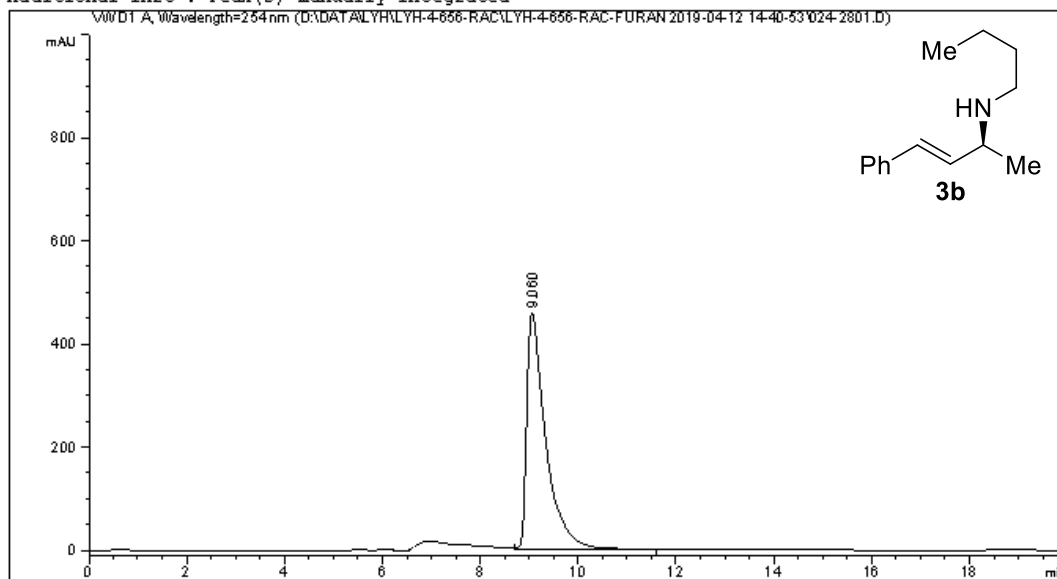

=====  
Area Percent Report  
=====

```
Sorted By      :      Signal
Multiplier     :      1.0000
Dilution       :      1.0000
Use Multiplier & Dilution Factor with ISTDs
```

Signal 1: VWD1 A, Wavelength=254 nm

| Peak # | RetTime [min] | Type | Width [min] | Area [mAU*s] | Height [mAU] | Area %   |
|--------|---------------|------|-------------|--------------|--------------|----------|
| 1      | 9.060         | VB   | 0.3911      | 1.24684e4    | 460.12094    | 100.0000 |

Totals :                    1.24684e4   460.12094

**Figure S144.** HPLC spectra of **3b**, related to **Figure 3**.

Data File D:\DATA\LYH\LYH-4-656-RAC\LYH-4-656-RAC-FURAN 2019-04-12 14-40-53\028-3201.D  
Sample Name: LJ-130-3

```
=====
Acq. Operator   :                               Seq. Line :   32
Acq. Instrument : Instrument 1                   Location  : Vial 28
Injection Date  : 4/13/2019 9:23:12 AM          Inj       :    1
                                                    Inj Volume: 5.000 µl
Acq. Method     : D:\DATA\LYH\LYH-4-656-RAC\LYH-4-656-RAC-FURAN 2019-04-12 14-40-53\WVD-AD(1-
                2)-99-1-0.6ML-5UL-254NM-40MIN.M
Last changed    : 3/5/2019 3:34:42 PM
Analysis Method : D:\METHOD\LG\DAD-0D(1-2)-95-5-1ML-2UL-ALL-50MIN.M
Last changed    : 4/15/2019 11:29:25 AM
                (modified after loading)
Additional Info : Peak(s) manually integrated
=====
```

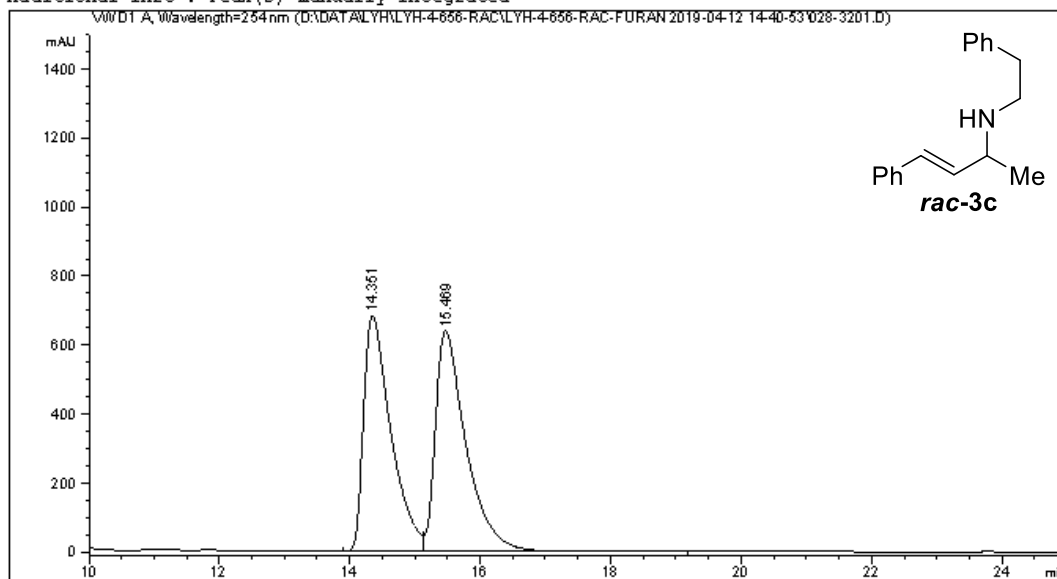

=====  
Area Percent Report  
=====

```
Sorted By      :      Signal
Multiplier     :      1.0000
Dilution       :      1.0000
Use Multiplier & Dilution Factor with ISTDs
```

Signal 1: VWD1 A, Wavelength=254 nm

| Peak # | RetTime [min] | Type | Width [min] | Area [mAU*s] | Height [mAU] | Area %  |
|--------|---------------|------|-------------|--------------|--------------|---------|
| 1      | 14.351        | BV   | 0.4302      | 1.98917e4    | 684.26312    | 48.7101 |
| 2      | 15.469        | VB   | 0.4812      | 2.09452e4    | 639.34631    | 51.2899 |

Totals :                                   4.08368e4 1323.60944

**Figure S145.** HPLC spectra of *rac-3c*, related to **Figure 3**.

Data File D:\DATA\LYH\LYH-4-656-RAC\LYH-4-656-RAC-FURAN 2019-04-12 14-40-53\025-2901.D  
Sample Name: LJ-108-9

```
=====
Acq. Operator   :                               Seq. Line :   29
Acq. Instrument : Instrument 1                   Location  : Vial 25
Injection Date  : 4/13/2019 7:20:36 AM          Inj       :    1
                                           Inj Volume: 5.000 µl
Acq. Method     : D:\DATA\LYH\LYH-4-656-RAC\LYH-4-656-RAC-FURAN 2019-04-12 14-40-53\WVD-AD(1-
                2)-99-1-0.6ML-5UL-254NM-40MIN.M
Last changed    : 3/5/2019 3:34:42 PM
Analysis Method : D:\METHOD\LG\DAD-0D(1-2)-95-5-1ML-2UL-ALL-50MIN.M
Last changed    : 4/15/2019 11:31:56 AM
                (modified after loading)
Additional Info : Peak(s) manually integrated
=====
```

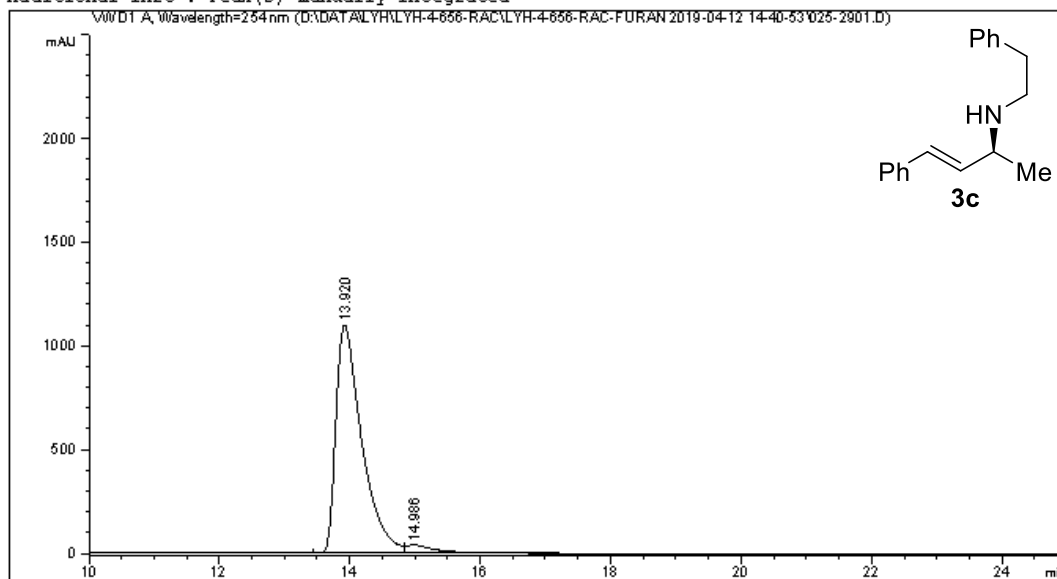

=====  
Area Percent Report  
=====

```
Sorted By      :      Signal
Multiplier     :      1.0000
Dilution       :      1.0000
Use Multiplier & Dilution Factor with ISTDs
```

Signal 1: WVD1 A, Wavelength=254 nm

| Peak # | RetTime [min] | Type | Width [min] | Area [mAU*s] | Height [mAU] | Area %  |
|--------|---------------|------|-------------|--------------|--------------|---------|
| 1      | 13.920        | VV   | 0.4096      | 3.02696e4    | 1097.99194   | 96.0947 |
| 2      | 14.986        | VB   | 0.4442      | 1230.14990   | 38.24589     | 3.9053  |

Totals :                                    3.14997e4  1136.23783

Instrument 2 4/15/2019 11:32:03 AM

Page 1 of 2

**Figure S146.** HPLC spectra of **3c**, related to **Figure 3**.

Data File D:\DATA\GUAN YUQING\LJ-108\LJ-108 2019-03-11 22-35-19\002-0301.D  
Sample Name: LJ-108-5-RAC

```
=====
Acq. Operator   :                               Seq. Line :    3
Acq. Instrument : Instrument 2                   Location  : Vial 2
Injection Date  : 3/11/2019 11:48:25 PM         Inj       :    1
                                                    Inj Volume: 5.000 µl
Acq. Method     : D:\DATA\GUAN YUQING\LJ-108\LJ-108 2019-03-11 22-35-19\DAD-0J(1-6)-95-5-0.
                  SML-SUL-ALL-60MIN.M
Last changed    : 3/7/2019 10:25:35 PM
Analysis Method : D:\METHOD\YANG JIAXIN\VWD-IA-(1-2)-85-15-1.0ML-SUL-210NM-60MIN.M
Last changed    : 5/31/2019 8:36:13 PM
                  (modified after loading)
Additional Info : Peak(s) manually integrated
=====
```

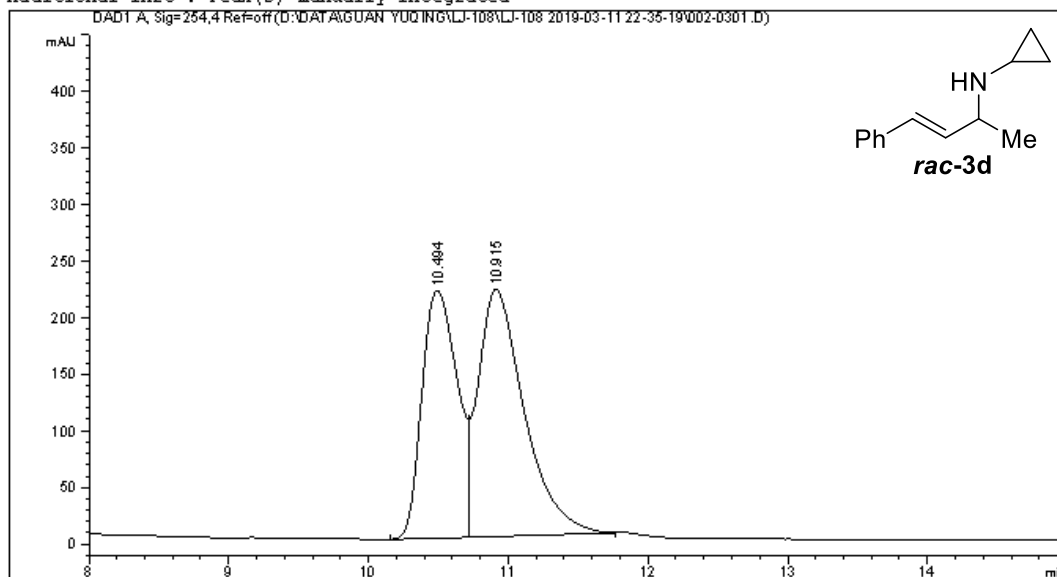

=====  
Area Percent Report  
=====

Sorted By : Signal  
Multiplier : 1.0000  
Dilution : 1.0000  
Use Multiplier & Dilution Factor with ISTDs

Signal 1: DAD1 A, Sig=254,4 Ref=off

| Peak # | RetTime [min] | Type | Width [min] | Area [mAU*s] | Height [mAU] | Area %  |
|--------|---------------|------|-------------|--------------|--------------|---------|
| 1      | 10.494        | BV   | 0.2743      | 3832.56519   | 218.90829    | 43.3094 |
| 2      | 10.915        | VB   | 0.3402      | 5016.70459   | 218.20282    | 56.6906 |

Totals : 8849.26978 437.11111

Figure S147. HPLC spectra of *rac-3d*, related to Figure 3.

Data File D:\DATA\GUAN YUQING\LJ-108\LJ-108 2019-03-12 10-09-36\001-0201.D  
Sample Name: LJ-108-5

```
=====
Acq. Operator   :                               Seq. Line :    2
Acq. Instrument : Instrument 2                   Location  : Vial 1
Injection Date  : 3/12/2019 10:23:31 AM         Inj       :    1
                                                    Inj Volume: 5.000 µl
Acq. Method     : D:\DATA\GUAN YUQING\LJ-108\LJ-108 2019-03-12 10-09-36\DAD-0J(1-6)-95-5-0.
                  SML-5UL-ALL-60MIN.M
Last changed    : 3/12/2019 10:32:53 AM
                  (modified after loading)
Analysis Method : D:\METHOD\LWD\VWD-AD(1-2)-95-5-1ML-3UL-210NM-10MIN.M
Last changed    : 3/21/2019 8:42:39 PM
                  (modified after loading)
Additional Info : Peak(s) manually integrated
=====
```

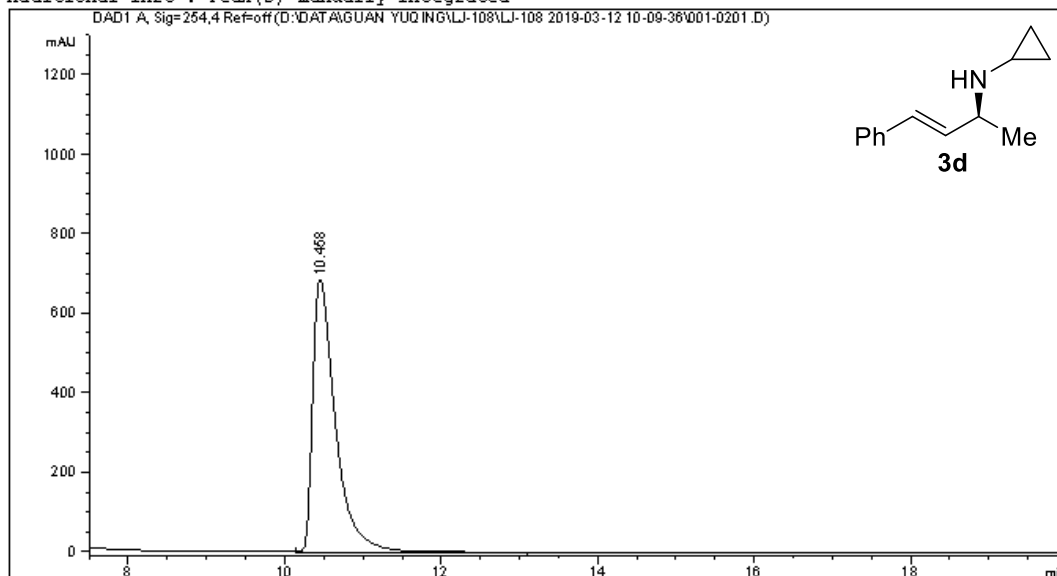

=====  
Area Percent Report  
=====

Sorted By : Signal  
Multiplier : 1.0000  
Dilution : 1.0000  
Use Multiplier & Dilution Factor with ISTDs

Signal 1: DAD1 A, Sig=254,4 Ref=off

| Peak # | RetTime [min] | Type | Width [min] | Area [mAU*s] | Height [mAU] | Area %   |
|--------|---------------|------|-------------|--------------|--------------|----------|
| 1      | 10.458        | VB   | 0.3057      | 1.38817e4    | 687.03412    | 100.0000 |

Totals : 1.38817e4 687.03412

**Figure S148.** HPLC spectra of **3d**, related to **Figure 3**.

Data File D:\DATA\LGY\WSC-20190926\WSC-20190926 2019-09-26 16-36-45\081-0701.D  
Sample Name: LJ-108-3-RAC

```
=====
Acq. Operator   :                               Seq. Line :    7
Acq. Instrument : Instrument 1                  Location  : Vial 81
Injection Date  : 9/26/2019 7:23:06 PM         Inj       :    1
                                                Inj Volume: 5.000 µl
Acq. Method     : D:\DATA\LGY\WSC-20190926\WSC-20190926 2019-09-26 16-36-45\VWD-AD(1-2)-99-1-
0.5ML-SUL-254NM-25MIN.M
Last changed    : 9/26/2019 6:06:23 PM
Analysis Method : D:\METHOD\GUAN YUQING\LONGJIAO\VWD-AD(1-2)-99-1-0.5ML-SUL-254NM-25MIN.M
Last changed    : 9/26/2019 8:26:00 PM
                (modified after loading)
Additional Info : Peak(s) manually integrated
=====
```

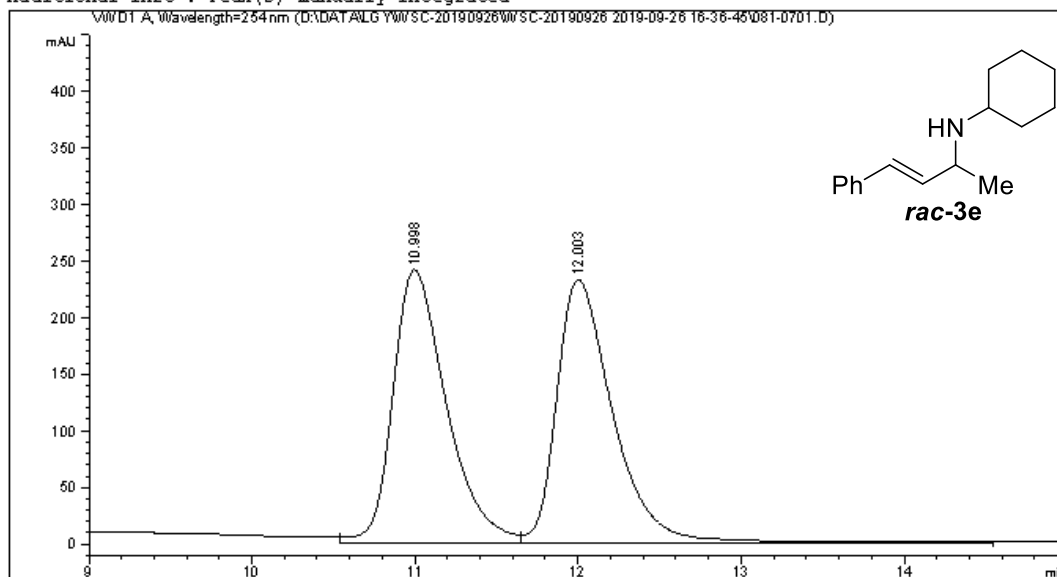

=====  
Area Percent Report  
=====

```
Sorted By      :      Signal
Multiplier     :      1.0000
Dilution       :      1.0000
Use Multiplier & Dilution Factor with ISTDs
```

Signal 1: VWD1 A, Wavelength=254 nm

| Peak # | RetTime [min] | Type | Width [min] | Area [mAU*s] | Height [mAU] | Area %  |
|--------|---------------|------|-------------|--------------|--------------|---------|
| 1      | 10.998        | VV   | 0.3455      | 5517.50684   | 241.51408    | 49.7795 |
| 2      | 12.003        | VB   | 0.3631      | 5566.38281   | 232.71924    | 50.2205 |

Totals :                                   1.10839e4   474.23332

Figure S149. HPLC spectra of *rac-3e*, related to Figure 3.





Data File D:\DATA\GUAN YUQING\LJ-137-3\LJ-137-3 2019-04-16 16-30-33\073-1501.D  
Sample Name: LJ-137-5-RAC

```
=====
Acq. Operator   :                               Seq. Line :   15
Acq. Instrument : Instrument 2                   Location  : Vial 73
Injection Date  : 4/16/2019 8:30:00 PM          Inj       :    1
                                                    Inj Volume: 5.000 µl
Acq. Method     : D:\DATA\GUAN YUQING\LJ-137-3\LJ-137-3 2019-04-16 16-30-33\DAD-0D(1-2)-99-1-
0.5ML-SUL-ALL-60MIN.M
Last changed    : 4/16/2019 8:04:43 PM
Analysis Method : D:\DATA\GUAN YUQING\LJ-137-3\LJ-137-3 2019-04-16 16-30-33\DAD-0D(1-2)-99-1-
0.5ML-SUL-ALL-60MIN.M (Sequence Method)
Last changed    : 4/17/2019 8:22:42 PM
                (modified after loading)
```

Additional Info : Peak(s) manually integrated

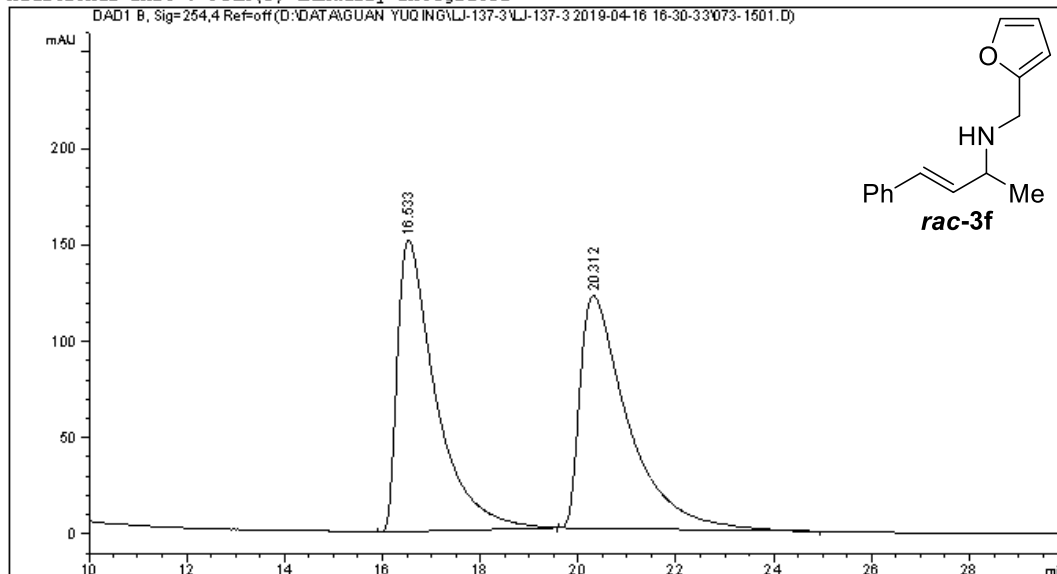

=====  
Area Percent Report  
=====

Sorted By : Signal  
Multiplier : 1.0000  
Dilution : 1.0000  
Use Multiplier & Dilution Factor with ISTDs

Signal 1: DAD1 B, Sig=254,4 Ref=off

| Peak # | RetTime [min] | Type | Width [min] | Area [mAU*s] | Height [mAU] | Area %  |
|--------|---------------|------|-------------|--------------|--------------|---------|
| 1      | 16.533        | BB   | 0.7913      | 8224.38672   | 151.04292    | 49.9715 |
| 2      | 20.312        | BB   | 0.9384      | 8233.77539   | 120.61980    | 50.0285 |

Totals : 1.64582e4 271.66273

Instrument 2 4/17/2019 8:22:47 PM

Page 1 of 2

Figure S151. HPLC spectra of *rac-3f*, related to Figure 3.

Data File D:\DATA\GUAN YUQING\LJ-137-3\LJ-137-3 2019-04-16 16-30-33\074-1601.D  
Sample Name: LJ-137-5

```
=====
Acq. Operator   :                               Seq. Line :   16
Acq. Instrument : Instrument 2                   Location  : Vial 74
Injection Date  : 4/16/2019 9:31:03 PM          Inj       :    1
                                                    Inj Volume: 5.000 µl
Acq. Method     : D:\DATA\GUAN YUQING\LJ-137-3\LJ-137-3 2019-04-16 16-30-33\DAD-0D(1-2)-99-1-
                  0.5ML-SUL-ALL-60MIN.M
Last changed    : 4/16/2019 8:04:43 PM
Analysis Method : D:\DATA\GUAN YUQING\LJ-137-3\LJ-137-3 2019-04-16 16-30-33\DAD-0D(1-2)-99-1-
                  0.5ML-SUL-ALL-60MIN.M (Sequence Method)
Last changed    : 4/17/2019 8:24:00 PM
                  (modified after loading)
Additional Info : Peak(s) manually integrated
```

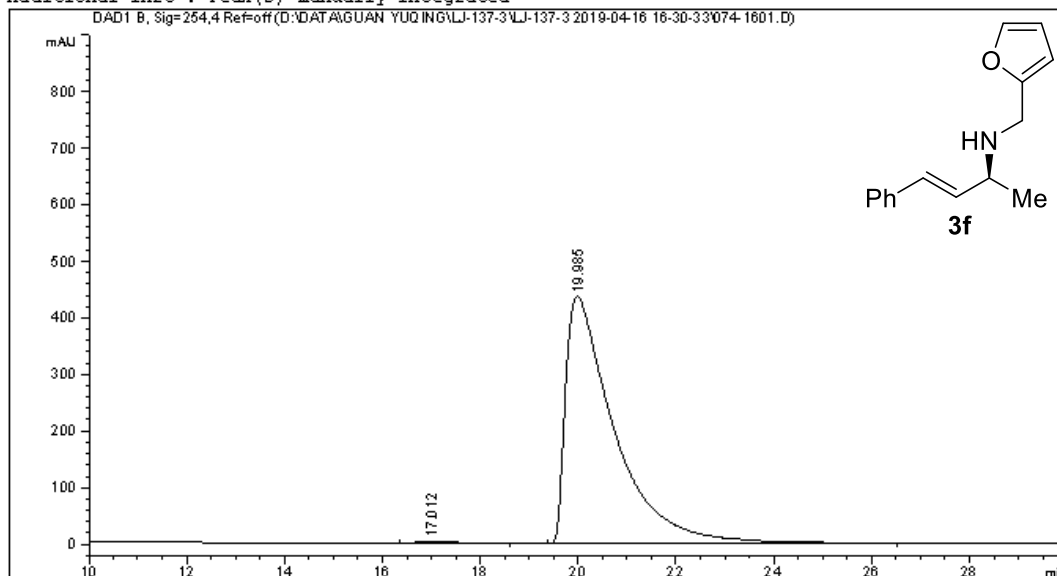

=====  
Area Percent Report  
=====

Sorted By : Signal  
Multiplier : 1.0000  
Dilution : 1.0000  
Use Multiplier & Dilution Factor with ISTDs

Signal 1: DAD1 B, Sig=254,4 Ref=off

| Peak # | RetTime [min] | Type | Width [min] | Area [mAU*s] | Height [mAU] | Area %  |
|--------|---------------|------|-------------|--------------|--------------|---------|
| 1      | 17.012        | BB   | 0.6427      | 203.91769    | 3.79637      | 0.6686  |
| 2      | 19.985        | BB   | 0.9646      | 3.02947e4    | 436.01385    | 99.3314 |

Totals : 3.04986e4 439.81022

Instrument 2 4/17/2019 8:24:05 PM

Page 1 of 2

Figure S152. HPLC spectra of 3f, related to Figure 3.

Data File D:\DATA\GUAN YUQING\LK-A\LKB-190415 2019-04-15 08-56-25\082-1401.D  
 Sample Name: LJ-137-2-RAC

```

=====
Acq. Operator   :                               Seq. Line :   14
Acq. Instrument : Instrument 1                   Location  : Vial 82
Injection Date  : 4/15/2019 4:32:13 PM          Inj       :    1
                                           Inj Volume: 5.000 µl

Acq. Method     : D:\DATA\GUAN YUQING\LK-A\LKB-190415 2019-04-15 08-56-25\WVD-AD(1-2)-95-5-0.
                  SML-5UL-254NM-20MIN.M
Last changed    : 3/6/2019 6:07:05 PM
Analysis Method : D:\DATA\GUAN YUQING\LJ-137-3\LJ-137-3 2019-04-16 16-30-33\DAD-0J(1-6)-99-1-
                  1ML-5UL-ALL-40MIN.M
Last changed    : 4/16/2019 5:10:13 PM
                  (modified after loading)
  
```

Additional Info : Peak(s) manually integrated

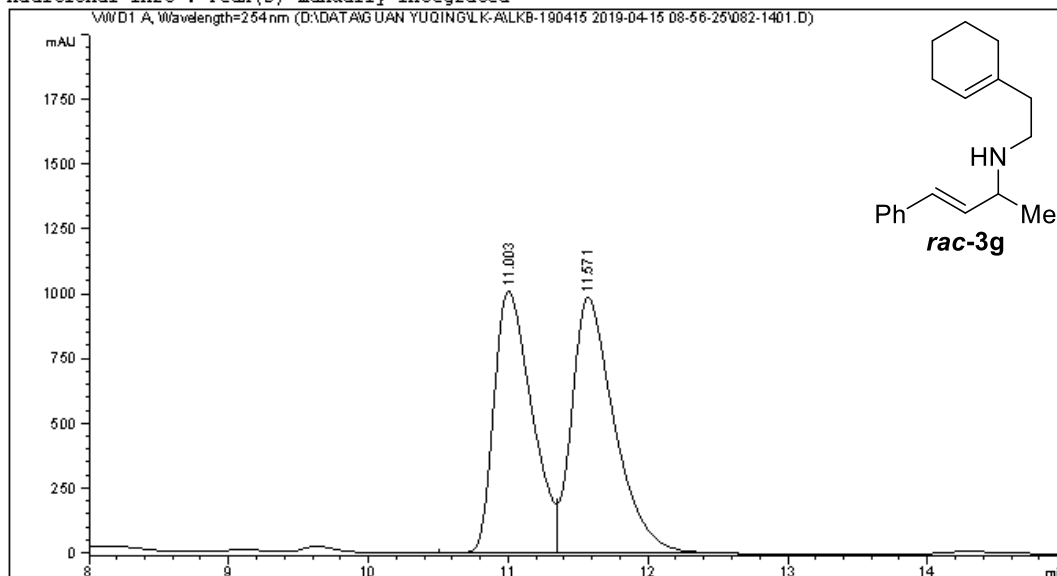

Area Percent Report

```

=====
Sorted By      :      Signal
Multiplier     :      1.0000
Dilution      :      1.0000
Use Multiplier & Dilution Factor with ISTDs
  
```

Signal 1: WVD1 A, Wavelength=254 nm

| Peak # | RetTime [min] | Type | Width [min] | Area [mAU*s] | Height [mAU] | Area %  |
|--------|---------------|------|-------------|--------------|--------------|---------|
| 1      | 11.003        | BV   | 0.2840      | 1.88847e4    | 1010.75867   | 47.4026 |
| 2      | 11.571        | VB   | 0.3170      | 2.09543e4    | 985.94733    | 52.5974 |

Totals : 3.98390e4 1996.70599

Instrument 2 4/16/2019 5:10:22 PM

Page 1 of 2

Figure S153. HPLC spectra of *rac-3g*, related to Figure 3.

Data File D:\DATA\GUAN YUQING\LK-A\LKB-190415 2019-04-15 08-56-25\081-1301.D  
Sample Name: LJ-137-2

```
=====
Acq. Operator   :                               Seq. Line :   13
Acq. Instrument : Instrument 1                   Location  : Vial 81
Injection Date  : 4/15/2019 4:11:23 PM          Inj       :    1
                                                    Inj Volume: 5.000 µl

Acq. Method     : D:\DATA\GUAN YUQING\LK-A\LKB-190415 2019-04-15 08-56-25\WVD-AD(1-2)-95-5-0.
                  SML-5UL-254NM-20MIN.M
Last changed    : 3/6/2019 6:07:05 PM
Analysis Method : D:\DATA\GUAN YUQING\LJ-137-3\LJ-137-3 2019-04-16 16-30-33\DAD-0J(1-6)-99-1-
                  1ML-5UL-ALL-40MIN.M
Last changed    : 4/16/2019 5:13:01 PM
                  (modified after loading)
Additional Info : Peak(s) manually integrated
=====
```

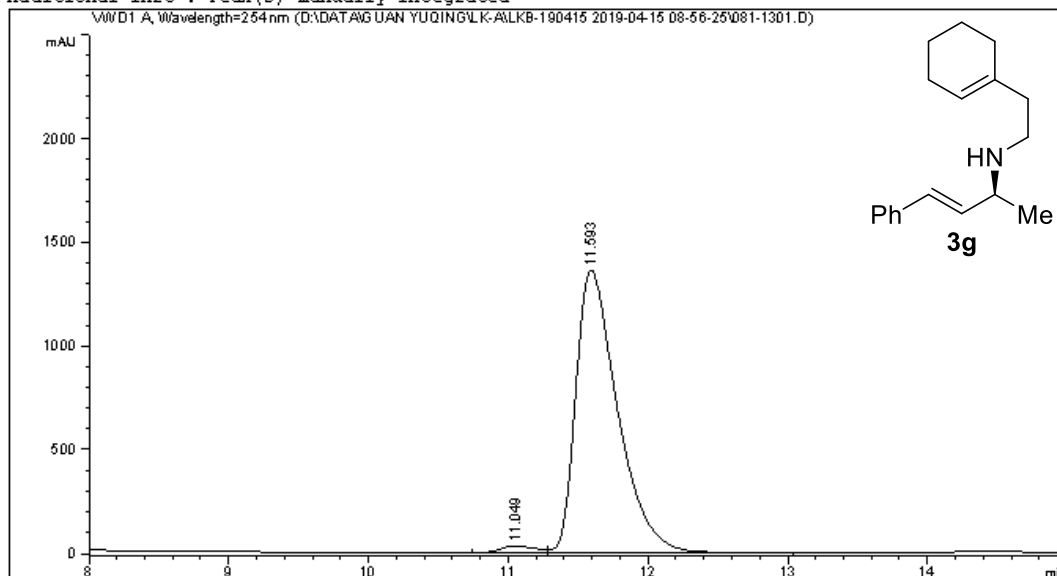

=====  
Area Percent Report  
=====

Sorted By : Signal  
Multiplier : 1.0000  
Dilution : 1.0000  
Use Multiplier & Dilution Factor with ISTDs

Signal 1: WVD1 A, Wavelength=254 nm

| Peak # | RetTime [min] | Type | Width [min] | Area [mAU*s] | Height [mAU] | Area %  |
|--------|---------------|------|-------------|--------------|--------------|---------|
| 1      | 11.049        | BV   | 0.2695      | 572.29053    | 32.96646     | 1.9854  |
| 2      | 11.593        | VB   | 0.3129      | 2.82527e4    | 1362.80029   | 98.0146 |

Totals : 2.88250e4 1395.76675

Instrument 2 4/16/2019 5:13:10 PM

Page 1 of 2

Figure S154. HPLC spectra of 3g, related to Figure 3.

Data File D:\DATA\GUAN YUQING\LJ-143-3\LJ-143-3 2019-04-30 21-36-43\092-0201.D  
Sample Name: LJ-143-3

```
=====
Acq. Operator   :                               Seq. Line :    2
Acq. Instrument : Instrument 2                  Location  : Vial 92
Injection Date  : 4/30/2019 9:48:50 PM         Inj       :    1
                                                Inj Volume: 5.000 µl
Acq. Method     : D:\DATA\GUAN YUQING\LJ-143-3\LJ-143-3 2019-04-30 21-36-43\DAD-0J(1-6)-99-1-
0.5ML-SUL-ALL-60MIN.M
Last changed    : 4/30/2019 10:09:25 PM
                (modified after loading)
Analysis Method : D:\DATA\GUAN YUQING\LJ-143-3\LJ-143-3 2019-04-30 21-36-43\DAD-0J(1-6)-99-1-
0.5ML-SUL-ALL-60MIN.M (Sequence Method)
Last changed    : 5/15/2019 6:54:22 PM
                (modified after loading)
Additional Info : Peak(s) manually integrated
=====
```

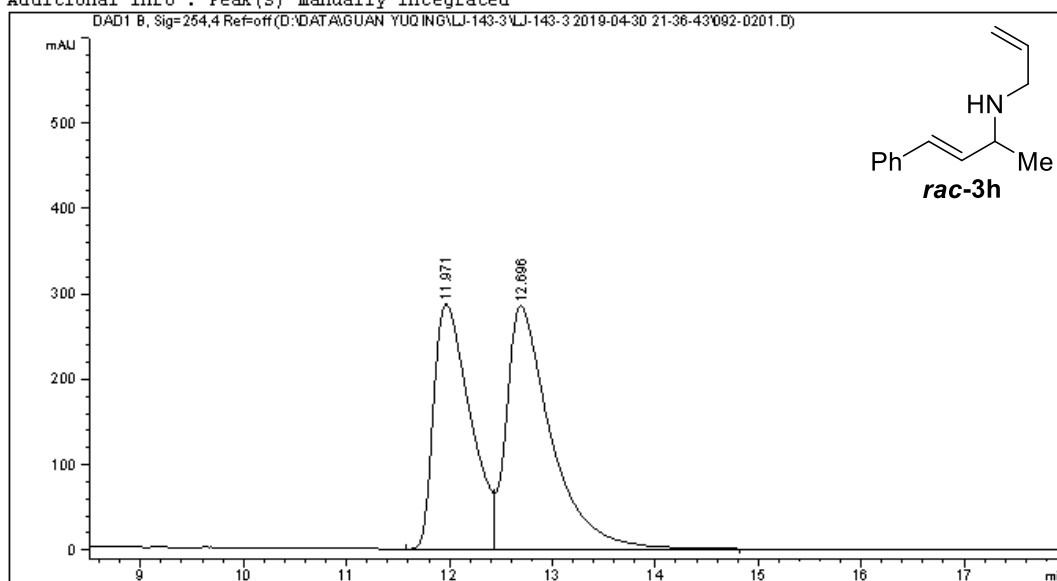

=====  
Area Percent Report  
=====

```
Sorted By      :      Signal
Multiplier     :      1.0000
Dilution       :      1.0000
Use Multiplier & Dilution Factor with ISTDs
```

Signal 1: DAD1 B, Sig=254,4 Ref=off

| Peak # | RetTime [min] | Type | Width [min] | Area [mAU*s] | Height [mAU] | Area %  |
|--------|---------------|------|-------------|--------------|--------------|---------|
| 1      | 11.971        | BV   | 0.3726      | 7039.42920   | 286.54825    | 45.4016 |
| 2      | 12.696        | VB   | 0.4370      | 8465.38184   | 284.63971    | 54.5984 |

Totals :                    1.55048e4    571.18796

Instrument 2 5/15/2019 6:55:28 PM

Page 1 of 2

Figure S155. HPLC spectra of *rac-3h*, related to Figure 3.

Data File D:\DATA\GUAN YUQING\LJ-141\LJ-141-3 2019-05-05 15-21-14\092-0201.D  
Sample Name: LJ-141-3

```
=====
Acq. Operator   :                               Seq. Line :    2
Acq. Instrument : Instrument 2                   Location  : Vial 92
Injection Date  : 5/5/2019 3:33:20 PM           Inj       :    1
                                                    Inj Volume: 5.000 µl

Acq. Method     : D:\DATA\GUAN YUQING\LJ-141\LJ-141-3 2019-05-05 15-21-14\DAD-0J(1-6)-99-1-0.
                  SML-5UL-ALL-40MIN.M
Last changed    : 5/5/2019 3:47:20 PM
                  (modified after loading)
Analysis Method : D:\DATA\GUAN YUQING\LJ-141\LJ-141-3 2019-05-05 15-21-14\DAD-0J(1-6)-99-1-0.
                  SML-5UL-ALL-40MIN.M (Sequence Method)
Last changed    : 5/15/2019 6:58:10 PM
                  (modified after loading)
Additional Info : Peak(s) manually integrated
=====
```

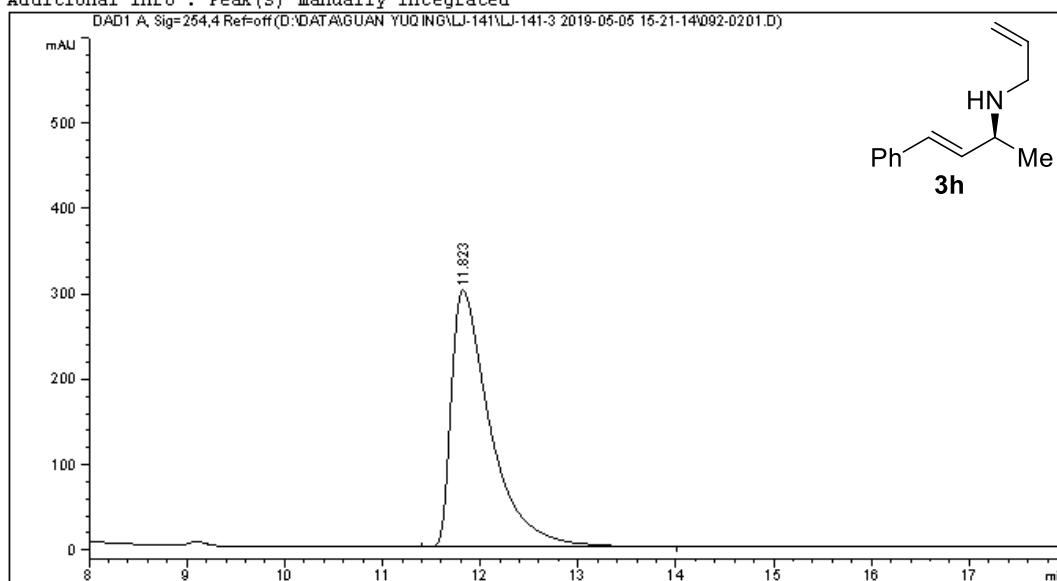

=====  
Area Percent Report  
=====

Sorted By : Signal  
Multiplier : 1.0000  
Dilution : 1.0000  
Use Multiplier & Dilution Factor with ISTDs

Signal 1: DAD1 A, Sig=254,4 Ref=off

| Peak # | RetTime [min] | Type | Width [min] | Area [mAU*s] | Height [mAU] | Area %   |
|--------|---------------|------|-------------|--------------|--------------|----------|
| 1      | 11.823        | BB   | 0.4130      | 8336.08691   | 301.08655    | 100.0000 |

Totals : 8336.08691 301.08655

**Figure S156.** HPLC spectra of **3h**, related to **Figure 3**.

Data File D:\DATA\GUAN YUQING\LK-A\LKB-190415 2019-04-15 08-56-25\084-2301.D  
Sample Name: LJ-137-4-RAC

```
=====
Acq. Operator   :                               Seq. Line :   23
Acq. Instrument : Instrument 1                   Location  : Vial 84
Injection Date  : 4/15/2019 8:20:08 PM         Inj       :    1
                                                Inj Volume: 5.000 µl
Acq. Method     : D:\DATA\GUAN YUQING\LK-A\LKB-190415 2019-04-15 08-56-25\WVD-AD(1-2)-99-1-0.
                                                6ML-5UL-254NM-40MIN.M
Last changed    : 3/5/2019 3:34:42 PM
Analysis Method : D:\DATA\GUAN YUQING\LJ-137-3\LJ-137-3 2019-04-16 16-30-33\WVD-AD(1-6)-99-1-
                                                1ML-5UL-ALL-40MIN.M
Last changed    : 4/16/2019 5:15:44 PM
                (modified after loading)
Additional Info : Peak(s) manually integrated
=====
```

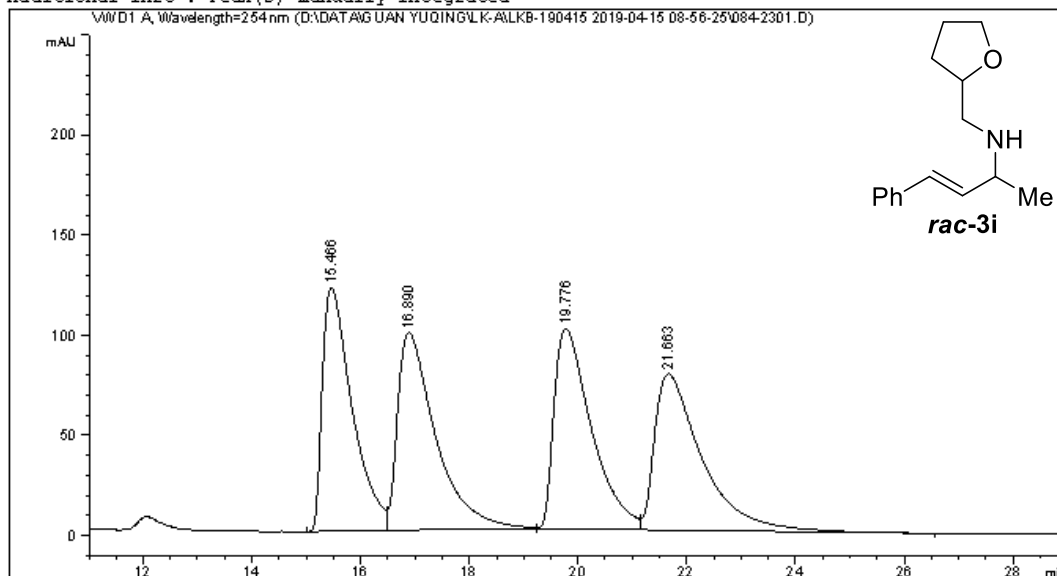

=====  
Area Percent Report  
=====

Sorted By : Signal  
Multiplier : 1.0000  
Dilution : 1.0000  
Use Multiplier & Dilution Factor with ISTDs

Signal 1: WVD1 A, Wavelength=254 nm

| Peak # | RetTime [min] | Type | Width [min] | Area [mAU*s] | Height [mAU] | Area %  |
|--------|---------------|------|-------------|--------------|--------------|---------|
| 1      | 15.466        | BV   | 0.5692      | 4599.29883   | 121.60919    | 24.3744 |
| 2      | 16.890        | VB   | 0.7248      | 4798.18164   | 98.42130     | 25.4284 |
| 3      | 19.776        | BV   | 0.7116      | 4753.76123   | 100.00168    | 25.1929 |
| 4      | 21.663        | VB   | 0.8876      | 4718.16992   | 77.89811     | 25.0043 |

Instrument 2 4/16/2019 5:15:54 PM

Page 1 of 2

Figure S157. HPLC spectra of *rac-3i*, related to Figure 3.



Data File D:\DATA\GUAN YUQING\LK-A\LKB-190415 2019-04-15 08-56-25\083-1801.D  
 Sample Name: LJ-137-4

```

=====
Acq. Operator   :                               Seq. Line :   18
Acq. Instrument : Instrument 1                   Location  : Vial 83
Injection Date  : 4/15/2019 6:25:42 PM         Inj       :    1
                                           Inj Volume: 5.000 µl

Acq. Method     : D:\DATA\GUAN YUQING\LK-A\LKB-190415 2019-04-15 08-56-25\WVD-AD(1-2)-99-1-0.
                  6ML-5UL-254NM-40MIN.M
Last changed    : 3/5/2019 3:34:42 PM
Analysis Method : D:\DATA\GUAN YUQING\LJ-137-3\LJ-137-3 2019-04-16 16-30-33\DAD-0J(1-6)-99-1-
                  1ML-5UL-ALL-40MIN.M
Last changed    : 4/16/2019 5:17:35 PM
                  (modified after loading)
Additional Info : Peak(s) manually integrated
  
```

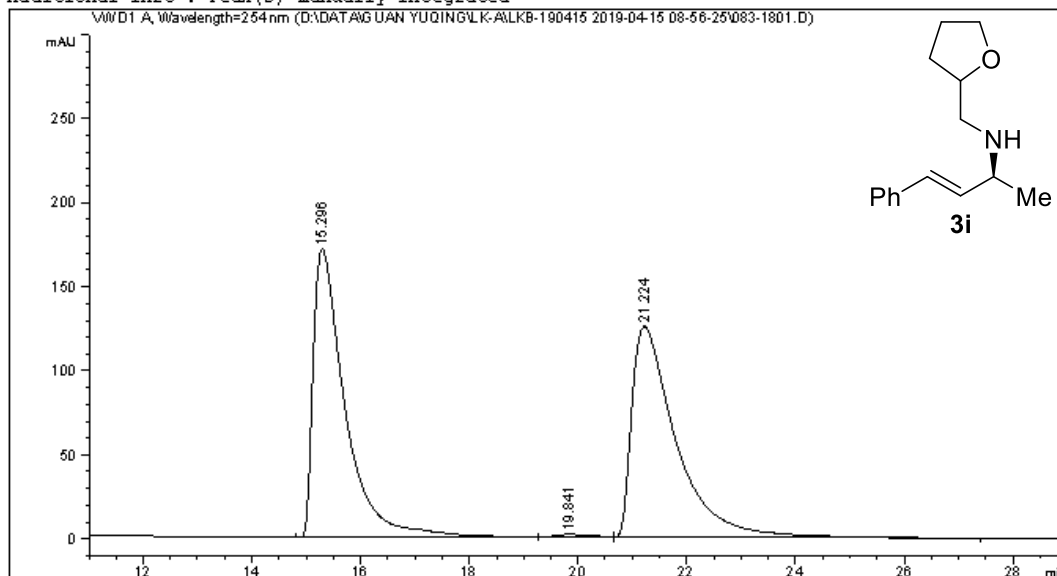

Area Percent Report

```

Sorted By      :      Signal
Multiplier     :      1.0000
Dilution       :      1.0000
Use Multiplier & Dilution Factor with ISTDs
  
```

Signal 1: WVD1 A, Wavelength=254 nm

| Peak # | RetTime [min] | Type | Width [min] | Area [mAU*s] | Height [mAU] | Area %  |
|--------|---------------|------|-------------|--------------|--------------|---------|
| 1      | 15.296        | BB   | 0.6059      | 7013.24561   | 171.57776    | 49.3191 |
| 2      | 19.841        | BV   | 0.5918      | 75.46820     | 1.71367      | 0.5307  |
| 3      | 21.224        | VB   | 0.8378      | 7131.41895   | 125.51943    | 50.1502 |

Totals : 1.42201e4 298.81086

Instrument 2 4/16/2019 5:19:31 PM

Page 1 of 2

Figure S158. HPLC spectra of 3i, related to Figure 3.

Data File D:\DATA\GUAN YUQING\LJ-197\LJ-197 2019-06-21 11-59-17\082-0301.D  
 Sample Name: LJ-197-1

```

=====
Acq. Operator   :                               Seq. Line :    3
Acq. Instrument : Instrument 1                  Location  : Vial 82
Injection Date  : 6/21/2019 1:33:44 PM        Inj       :    1
                                                Inj Volume: 5.000 µl

Acq. Method     : D:\DATA\GUAN YUQING\LJ-197\LJ-197 2019-06-21 11-59-17\VWD-AS(1-6)-90-10-0.
                  SML-5UL-254NM-80MIN.M
Last changed    : 6/21/2019 11:56:20 AM
Analysis Method : D:\METHOD\LG\VWD-AS(1-6)-85-15-1ML-2UL-210NM-30MIN.M
Last changed    : 6/26/2019 3:41:31 PM
                  (modified after loading)
Additional Info : Peak(s) manually integrated
  
```

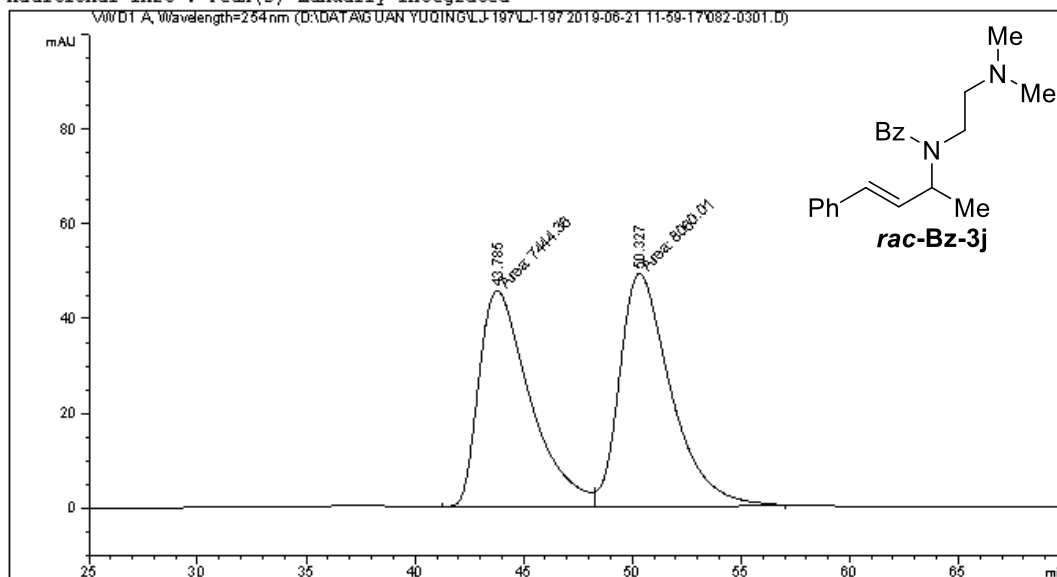

=====  
 Area Percent Report  
 =====

```

Sorted By      :      Signal
Multiplier     :      1.0000
Dilution       :      1.0000
Use Multiplier & Dilution Factor with ISTDs
  
```

Signal 1: VWD1 A, Wavelength=254 nm

| Peak # | RetTime [min] | Type | Width [min] | Area [mAU*s] | Height [mAU] | Area %  |
|--------|---------------|------|-------------|--------------|--------------|---------|
| 1      | 43.785        | MF   | 2.7221      | 7444.35938   | 45.58009     | 48.0146 |
| 2      | 50.327        | FM   | 2.7315      | 8060.00781   | 49.17983     | 51.9854 |

Totals :                      1.55044e4    94.75991

**Figure S159.** HPLC spectra of *rac-Bz-3j*, related to **Figure 3**.

Data File D:\DATA\GUAN YUQING\LK-A\LK-190625-S 2019-06-25 20-53-56\081-0601.D  
 Sample Name: LJ-201-2

```

=====
Acq. Operator   :                               Seq. Line :    6
Acq. Instrument : Instrument 1                  Location  : Vial 81
Injection Date  : 6/26/2019 1:24:20 AM         Inj       :    1
                                           Inj Volume: 5.000 µl

Acq. Method     : D:\DATA\GUAN YUQING\LK-A\LK-190625-S 2019-06-25 20-53-56\VWD-AS(1-6)-90-10-
                  0.5ML-5UL-254NM-80MIN.M
Last changed    : 6/21/2019 11:56:20 AM
Analysis Method : D:\METHOD\LG\VWD-AS(1-6)-85-15-1ML-2UL-210NM-30MIN.M
Last changed    : 6/26/2019 3:39:40 PM
                  (modified after loading)
Additional Info : Peak(s) manually integrated
  
```

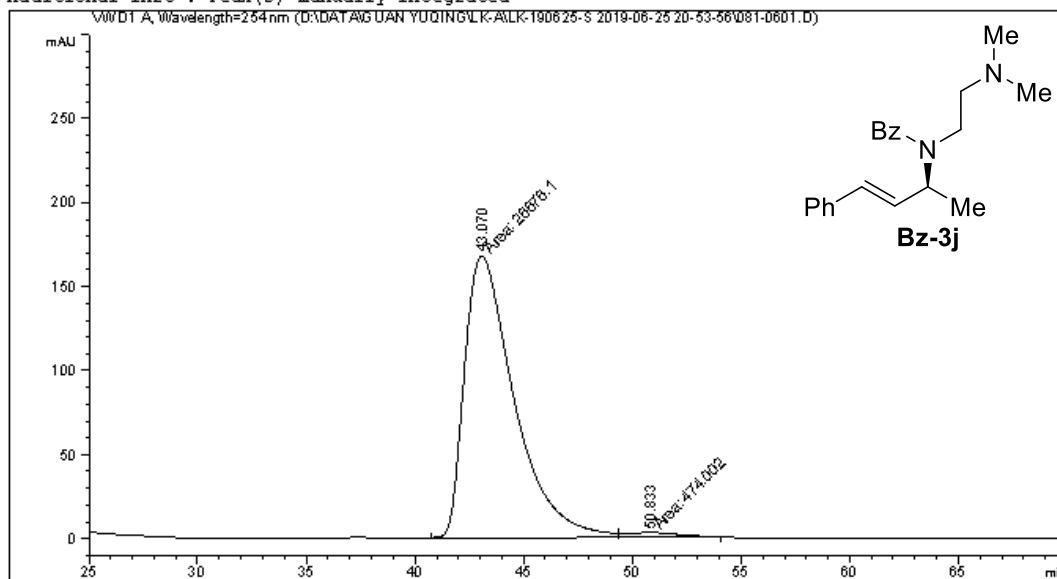

=====  
 Area Percent Report  
 =====

```

Sorted By      :      Signal
Multiplier     :      1.0000
Dilution       :      1.0000
Use Multiplier & Dilution Factor with ISTDs
  
```

Signal 1: VWD1 A, Wavelength=254 nm

| Peak # | RetTime [min] | Type | Width [min] | Area [mAU*s] | Height [mAU] | Area %  |
|--------|---------------|------|-------------|--------------|--------------|---------|
| 1      | 43.070        | MF   | 2.6495      | 2.66761e4    | 167.80351    | 98.2541 |
| 2      | 50.833        | FM   | 2.8864      | 474.00171    | 2.73700      | 1.7459  |

Totals :                            2.71501e4    170.54051

Figure S160. HPLC spectra of Bz-3j, related to Figure 3.

Data File D:\DATA\LYH\LYH-5-899\LYH-5-899-RAC-1 2019-09-28 08-42-40\084-0901.D  
Sample Name: LJ-2-48-RAC

```
=====
Acq. Operator   :                               Seq. Line :    9
Acq. Instrument : Instrument 1                   Location  : Vial 84
Injection Date  : 9/28/2019 12:30:11 PM         Inj       :    1
                                                    Inj Volume: 5.000 µl
Acq. Method     : D:\DATA\LYH\LYH-5-899\LYH-5-899-RAC-1 2019-09-28 08-42-40\VWD-AD(1-2)-95-5-
                  0.5ML-5UL-254NM-30MIN.M
Last changed    : 4/9/2019 4:22:03 PM
Analysis Method : D:\METHOD\GUAN YUQING\LONGJIAO\VWD-AD(1-2)-99-1-0.5ML-5UL-254NM-25MIN.M
Last changed    : 9/28/2019 10:40:08 PM
                  (modified after loading)
Additional Info : Peak(s) manually integrated
=====
```

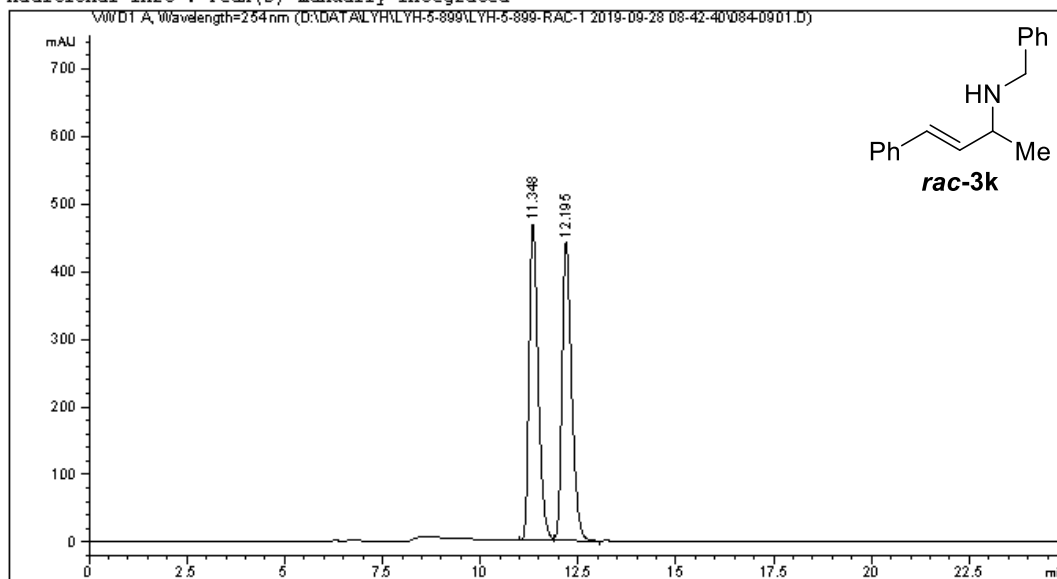

=====  
Area Percent Report  
=====

```
Sorted By      :      Signal
Multiplier     :      1.0000
Dilution       :      1.0000
Use Multiplier & Dilution Factor with ISTDs
```

Signal 1: VWD1 A, Wavelength=254 nm

| Peak # | RetTime [min] | Type | Width [min] | Area [mAU*s] | Height [mAU] | Area %  |
|--------|---------------|------|-------------|--------------|--------------|---------|
| 1      | 11.348        | BV   | 0.2453      | 7554.13770   | 468.01944    | 49.9302 |
| 2      | 12.195        | VB   | 0.2624      | 7575.27100   | 441.02200    | 50.0698 |

Totals :                                    1.51294e4    909.04144

Figure S161. HPLC spectra of *rac-3k*, related to Figure 3.

Data File D:\DATA\LYH\LYH-5-899\LYH-5-899-RAC-1 2019-09-28 08-42-40\083-0801.D  
Sample Name: LJ-2-48

```
=====
Acq. Operator   :                               Seq. Line :    8
Acq. Instrument : Instrument 1                   Location  : Vial 83
Injection Date  : 9/28/2019 11:59:20 AM         Inj       :    1
                                           Inj Volume: 5.000 µl

Acq. Method     : D:\DATA\LYH\LYH-5-899\LYH-5-899-RAC-1 2019-09-28 08-42-40\VWD-AD(1-2)-95-5-
                  0.5ML-5UL-254NM-30MIN.M
Last changed    : 4/9/2019 4:22:03 PM
Analysis Method : D:\METHOD\GUAN YUQING\LONGJIAO\VWD-AD(1-2)-99-1-0.5ML-5UL-254NM-25MIN.M
Last changed    : 9/28/2019 10:43:16 PM
                  (modified after loading)
Additional Info : Peak(s) manually integrated
=====
```

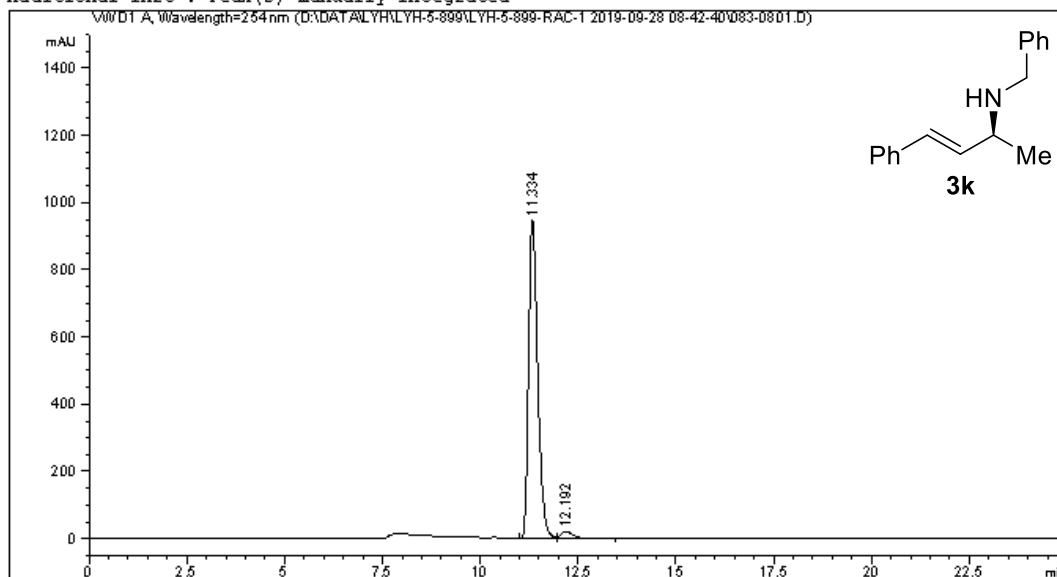

=====  
Area Percent Report  
=====

```
Sorted By      :      Signal
Multiplier     :      1.0000
Dilution       :      1.0000
Use Multiplier & Dilution Factor with ISTDs
```

Signal 1: VWD1 A, Wavelength=254 nm

| Peak # | RetTime [min] | Type | Width [min] | Area [mAU*s] | Height [mAU] | Area %  |
|--------|---------------|------|-------------|--------------|--------------|---------|
| 1      | 11.334        | BV   | 0.2461      | 1.52293e4    | 944.59326    | 97.5071 |
| 2      | 12.192        | VB   | 0.2853      | 389.35504    | 20.52347     | 2.4929  |

Totals :                           1.56187e4   965.11673

**Figure S162.** HPLC spectra of **3k**, related to **Figure 3**.

Data File D:\DATA\GUAN YUQING\LJ-165-VWD\LJ-165-AD 2019-05-17 09-17-21\003-0501.D  
 Sample Name: LJ-165-RAC

```

=====
Acq. Operator   :                               Seq. Line :    5
Acq. Instrument : Instrument 1                   Location  : Vial 3
Injection Date  : 5/17/2019 11:13:20 AM         Inj       :    1
                                                    Inj Volume: 8.000 µl
Acq. Method    : D:\DATA\GUAN YUQING\LJ-165-VWD\LJ-165-AD 2019-05-17 09-17-21\VWD-AD(1-2)-99
                : -1-0.5ML-5UL-254NM-60MIN.M
Last changed   : 5/17/2019 9:43:47 AM
                : (modified after loading)
Analysis Method: D:\METHOD\LWD\DAD-OD(1-2)-95-5-0.5ML-3UL-ALL-60MIN-517.M
Last changed   : 5/18/2019 9:15:28 AM
                : (modified after loading)
  
```

Additional Info : Peak(s) manually integrated

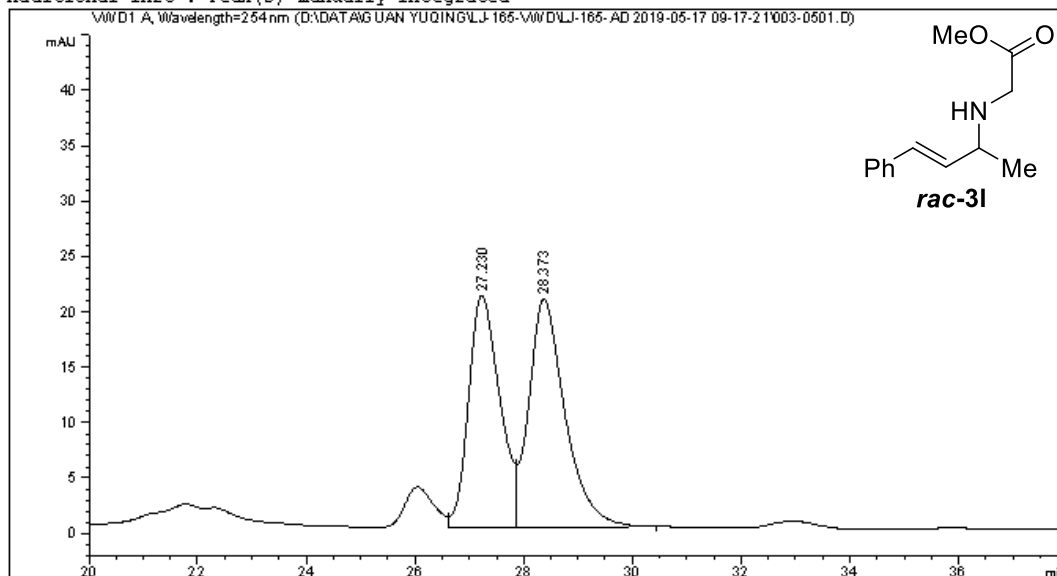

=====  
 Area Percent Report  
 =====

```

Sorted By      : Signal
Multiplier     : 1.0000
Dilution      : 1.0000
Use Multiplier & Dilution Factor with ISTDs
  
```

Signal 1: WWD1 A, Wavelength=254 nm

| Peak # | RetTime [min] | Type | Width [min] | Area [mAU*s] | Height [mAU] | Area %  |
|--------|---------------|------|-------------|--------------|--------------|---------|
| 1      | 27.230        | VV   | 0.5995      | 832.64209    | 20.91406     | 46.7610 |
| 2      | 28.373        | VB   | 0.6807      | 947.98993    | 20.56817     | 53.2390 |

Totals :                    1780.63202    41.48223

Figure S163. HPLC spectra of *rac-3I*, related to Figure 3.

Data File D:\DATA\GUAN YUQING\LJ-165-VWD\LJ-165-AD 2019-05-17 09-17-21\002-0401.D  
Sample Name: LJ-165-2

```
=====
Acq. Operator   :                               Seq. Line :    4
Acq. Instrument : Instrument 1                  Location  : Vial 2
Injection Date  : 5/17/2019 10:27:26 AM        Inj       :    1
                                                Inj Volume: 8.000 µl
Acq. Method     : D:\DATA\GUAN YUQING\LJ-165-VWD\LJ-165-AD 2019-05-17 09-17-21\VWD-AD(1-2)-99
                  -1-0.5ML-5UL-254NM-60MIN.M
Last changed    : 5/17/2019 9:43:47 AM
                  (modified after loading)
Analysis Method : D:\METHOD\LWD\DAD-OD(1-2)-95-5-0.5ML-3UL-ALL-60MIN-517.M
Last changed    : 5/18/2019 9:15:28 AM
                  (modified after loading)
Additional Info : Peak(s) manually integrated
```

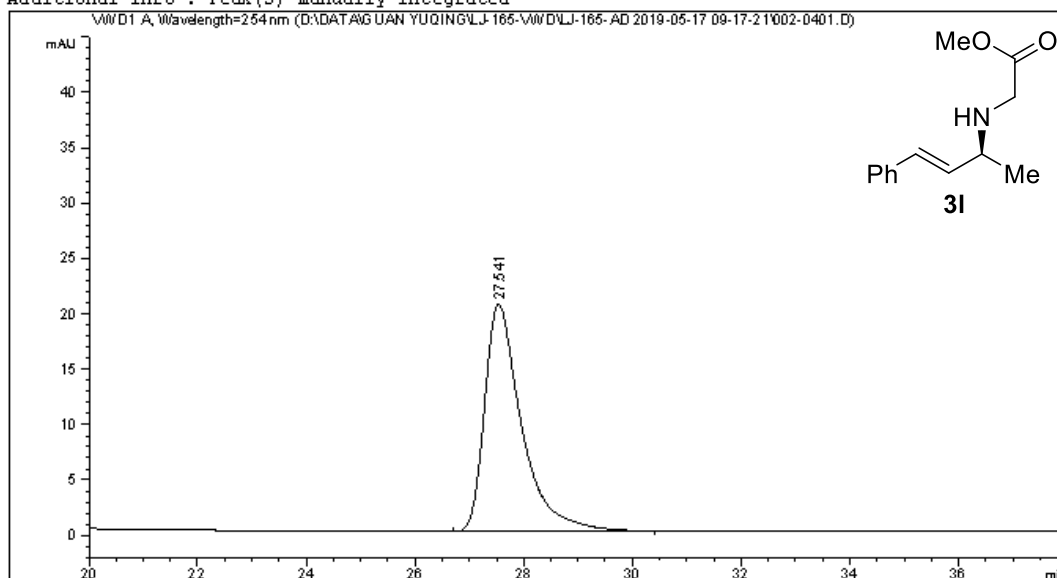

=====  
Area Percent Report  
=====

Sorted By : Signal  
Multiplier : 1.0000  
Dilution : 1.0000  
Use Multiplier & Dilution Factor with ISTDs

Signal 1: WWD1 A, Wavelength=254 nm

| Peak # | RetTime [min] | Type | Width [min] | Area [mAU*s] | Height [mAU] | Area %   |
|--------|---------------|------|-------------|--------------|--------------|----------|
| 1      | 27.541        | BB   | 0.6917      | 967.04639    | 20.52325     | 100.0000 |

Totals : 967.04639 20.52325

Figure S164. HPLC spectra of 3I, related to Figure 3.

Data File D:\DATA\GUAN YUQING\LJ-106\LJ-106 2019-03-06 23-11-49\002-0301.D  
Sample Name: LJ-103-1-RAC

```
=====
Acq. Operator   :                               Seq. Line :    3
Acq. Instrument : Instrument 2                   Location  : Vial 2
Injection Date  : 3/6/2019 11:49:55 PM          Inj       :    1
                                                    Inj Volume: 5.000 µl
Acq. Method     : D:\DATA\GUAN YUQING\LJ-106\LJ-106 2019-03-06 23-11-49\DAD-OD(1-2)-95-5-1ML-
                  SUL-ALL-20MIN.M
Last changed    : 3/5/2019 8:56:43 PM
Analysis Method : D:\METHOD\GUAN YUQING\LONGJIAO\DAD-IA(1-6)-95-5-0.SML-SUL-ALL-40MIN.M
Last changed    : 3/19/2019 9:55:54 PM
                  (modified after loading)
Additional Info : Peak(s) manually integrated
=====
```

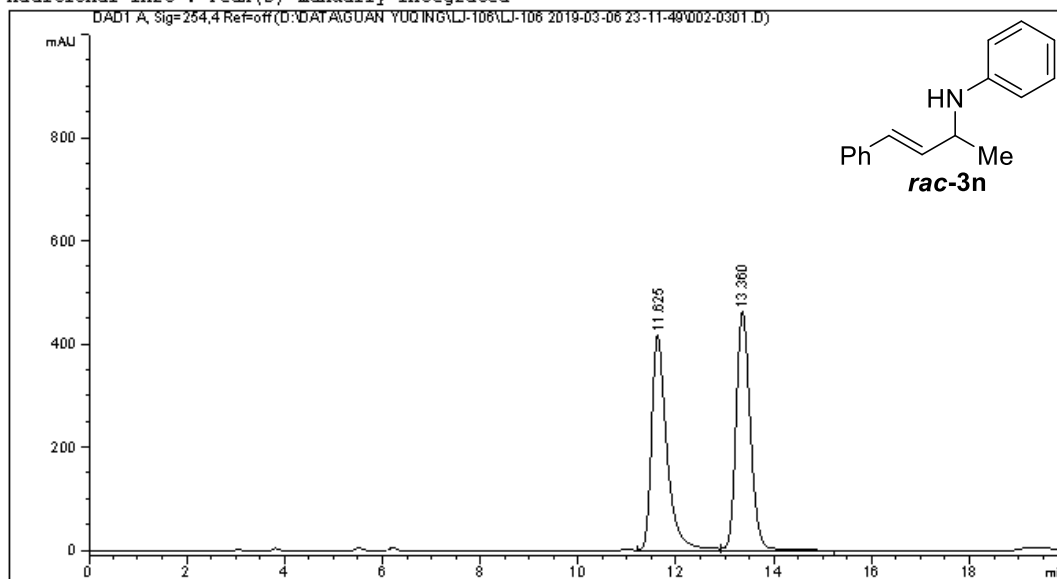

=====  
Area Percent Report  
=====

Sorted By : Signal  
Multiplier : 1.0000  
Dilution : 1.0000  
Use Multiplier & Dilution Factor with ISTDs

Signal 1: DAD1 A, Sig=254,4 Ref=off

| Peak # | RetTime [min] | Type | Width [min] | Area [mAU*s] | Height [mAU] | Area %  |
|--------|---------------|------|-------------|--------------|--------------|---------|
| 1      | 11.625        | VV   | 0.3233      | 9037.16797   | 416.16431    | 49.3755 |
| 2      | 13.360        | VB   | 0.3097      | 9265.78516   | 462.59473    | 50.6245 |

Totals : 1.83030e4 878.75903

Figure S165. HPLC spectra of *rac-3n*, related to Figure 3.



Data File D:\DATA\GUAN YUQING\LJ-106\LJ-106 2019-03-06 23-11-49\001-0201.D  
Sample Name: LJ-103-1

```
=====
Acq. Operator   :                               Seq. Line :    2
Acq. Instrument : Instrument 2                   Location  : Vial 1
Injection Date  : 3/6/2019 11:28:57 PM          Inj       :    1
                                                    Inj Volume: 5.000 µl
Acq. Method     : D:\DATA\GUAN YUQING\LJ-106\LJ-106 2019-03-06 23-11-49\DAD-OD(1-2)-95-5-1ML-
                  SUL-ALL-20MIN.M
Last changed    : 3/5/2019 8:56:43 PM
Analysis Method : D:\METHOD\GUAN YUQING\LONGJIAO\DAD-IA(1-6)-95-5-0.SML-SUL-ALL-40MIN.M
Last changed    : 3/19/2019 9:58:51 PM
                  (modified after loading)
Additional Info : Peak(s) manually integrated
=====
```

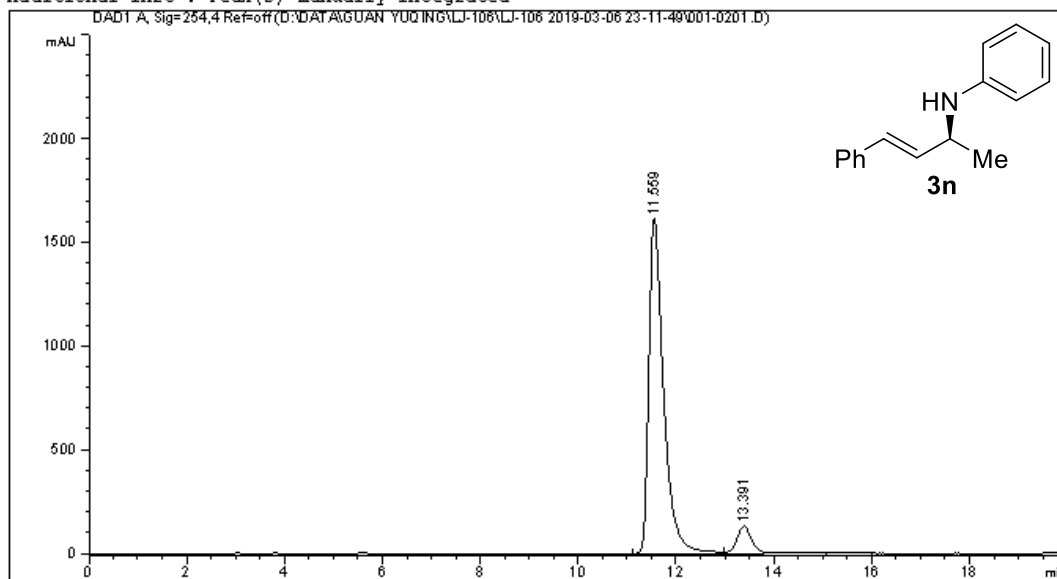

=====  
Area Percent Report  
=====

```
Sorted By      :      Signal
Multiplier     :      1.0000
Dilution       :      1.0000
Use Multiplier & Dilution Factor with ISTDs
```

Signal 1: DAD1 A, Sig=254,4 Ref=off

| Peak # | RetTime [min] | Type | Width [min] | Area [mAU*s] | Height [mAU] | Area %  |
|--------|---------------|------|-------------|--------------|--------------|---------|
| 1      | 11.559        | BV   | 0.3120      | 3.36730e4    | 1609.93042   | 92.6141 |
| 2      | 13.391        | VB   | 0.3181      | 2685.40967   | 129.39296    | 7.3859  |

Totals :                           3.63584e4 1739.32338

**Figure S166.** HPLC spectra of **3n**, related to **Figure 3**.

Data File D:\DATA\GUAN YUQING\LJ-124-7\LJ-124-7-RAC 2019-04-08 11-06-38\013-0201.D  
Sample Name: LJ-124-7-RAC

```
=====
Acq. Operator   :                               Seq. Line :    2
Acq. Instrument : Instrument 1                   Location  : Vial 13
Injection Date  : 4/8/2019 11:20:11 AM          Inj       :    1
                                                    Inj Volume: 5.000 µl
Acq. Method     : D:\DATA\GUAN YUQING\LJ-124-7\LJ-124-7-RAC 2019-04-08 11-06-38\VWD-AD (1-2)-
                  95-5-0.5ML-SUL-254NM-60MIN.M
Last changed    : 3/11/2019 10:31:45 PM
Analysis Method : D:\METHOD\LG\DAD-0J(1-6)-80-20-1ML-SUL-ALL-60MIN.M
Last changed    : 4/14/2019 9:50:19 PM
                  (modified after loading)
Additional Info : Peak(s) manually integrated
=====
```

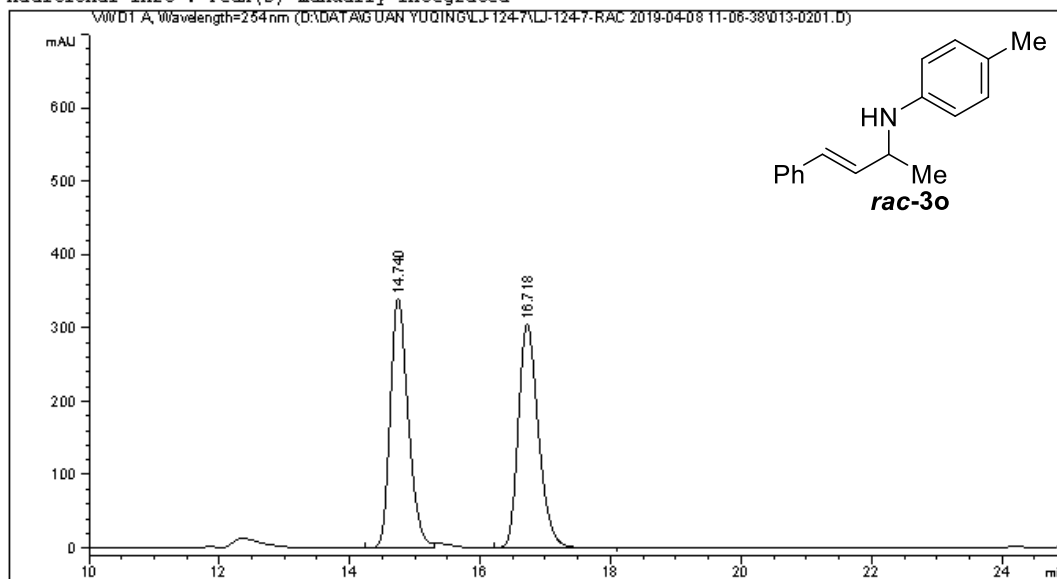

=====  
Area Percent Report  
=====

```
Sorted By      :      Signal
Multiplier     :      1.0000
Dilution       :      1.0000
Use Multiplier & Dilution Factor with ISTDs
```

Signal 1: VWD1 A, Wavelength=254 nm

| Peak # | RetTime [min] | Type | Width [min] | Area [mAU*s] | Height [mAU] | Area %  |
|--------|---------------|------|-------------|--------------|--------------|---------|
| 1      | 14.740        | BV   | 0.2928      | 6485.12012   | 339.57712    | 50.0335 |
| 2      | 16.718        | BB   | 0.3248      | 6476.43945   | 304.93433    | 49.9665 |

Totals :                                   1.29616e4   644.51144

Figure S167. HPLC spectra of *rac-3o*, related to Figure 3.

Data File D:\DATA\GUAN YUQING\LK-A\LKB-190410 2019-04-10 09-04-18\083-0701.D  
Sample Name: LJ-124-7

```
=====
Acq. Operator   :                               Seq. Line :    7
Acq. Instrument : Instrument 1                  Location  : Vial 83
Injection Date  : 4/10/2019 11:42:55 AM        Inj       :    1
                                           Inj Volume: 5.000 µl
Acq. Method     : D:\DATA\GUAN YUQING\LK-A\LKB-190410 2019-04-10 09-04-18\WVD-AD(1-2)-95-5-0.
                                           SML-SUL-254NM-30MIN.M
Last changed    : 4/9/2019 4:22:03 PM
Analysis Method : D:\METHOD\LG\DAD-0J(1-6)-80-20-1ML-SUL-ALL-60MIN.M
Last changed    : 4/14/2019 9:48:13 PM
                  (modified after loading)
Additional Info : Peak(s) manually integrated
=====
```

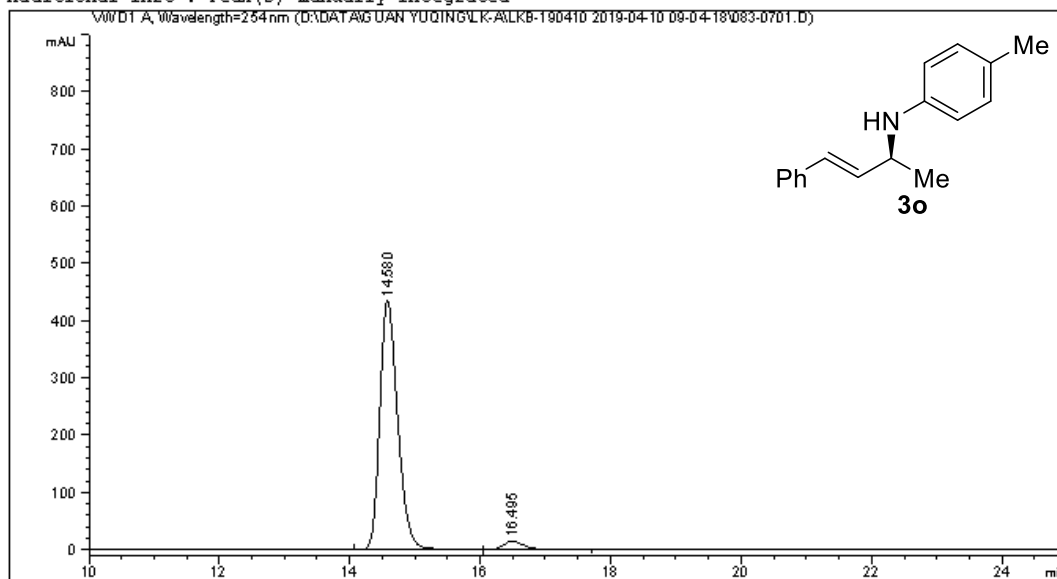

=====  
Area Percent Report  
=====

```
Sorted By      :      Signal
Multiplier     :      1.0000
Dilution       :      1.0000
Use Multiplier & Dilution Factor with ISTDs
```

Signal 1: WVD1 A, Wavelength=254 nm

| Peak # | RetTime [min] | Type | Width [min] | Area [mAU*s] | Height [mAU] | Area %  |
|--------|---------------|------|-------------|--------------|--------------|---------|
| 1      | 14.580        | BB   | 0.2905      | 8222.70313   | 435.13837    | 96.3629 |
| 2      | 16.495        | BB   | 0.3246      | 310.35309    | 14.56537     | 3.6371  |

Totals :                                   8533.05621   449.70374

Figure S168. HPLC spectra of 3o, related to Figure 3.

```
=====
Acq. Operator   :                               Seq. Line :    7
Acq. Instrument : Instrument 2                   Location  : Vial 93
Injection Date  : 4/9/2019 6:24:24 PM           Inj       :    1
                                                    Inj Volume: 5.000 µl
Acq. Method     : D:\DATA\LG\GY-3-132\GY-3-132 2019-04-09 15-22-08\DAD-0D(1-2)-95-5-1ML-
                : SUL-ALL-60MIN.M
Last changed    : 4/9/2019 6:21:57 PM
                : (modified after loading)
Analysis Method : D:\METHOD\LG\DAD-0J(1-6)-80-20-1ML-5UL-ALL-60MIN.M
Last changed    : 4/14/2019 9:53:27 PM
                : (modified after loading)
Additional Info : Peak(s) manually integrated
=====
```

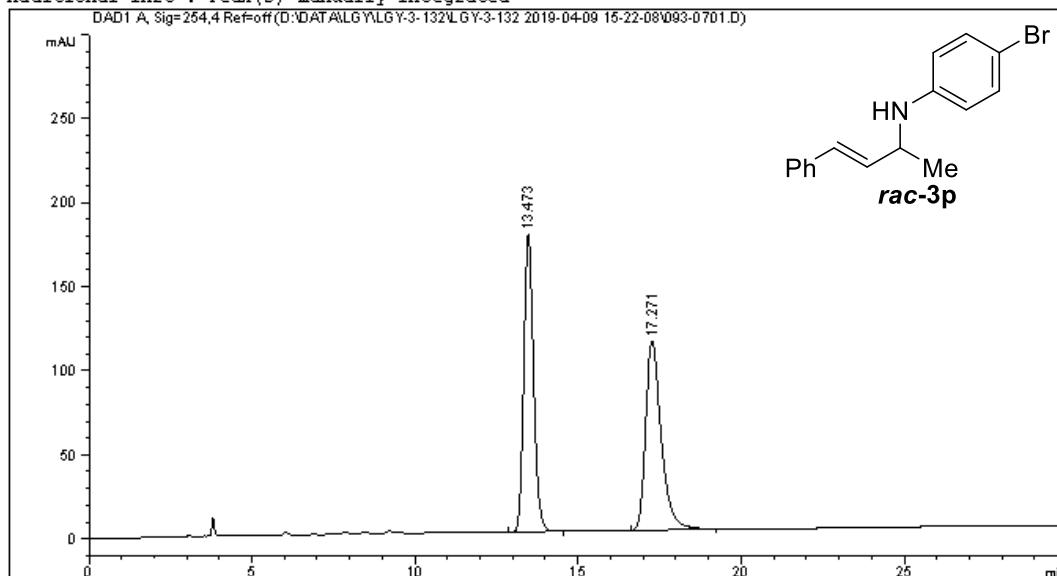

=====  
Area Percent Report  
=====

Sorted By : Signal  
Multiplier : 1.0000  
Dilution : 1.0000  
Use Multiplier & Dilution Factor with ISTDs

Signal 1: DAD1 A, Sig=254,4 Ref=off

| Peak # | RetTime [min] | Type | Width [min] | Area [mAU*s] | Height [mAU] | Area %  |
|--------|---------------|------|-------------|--------------|--------------|---------|
| 1      | 13.473        | BB   | 0.3213      | 3693.51050   | 177.09816    | 49.7634 |
| 2      | 17.271        | BB   | 0.4958      | 3728.63354   | 112.74161    | 50.2366 |

Totals : 7422.14404 289.83977

Figure S169. HPLC spectra of *rac-3p*, related to Figure 3.

Data File D:\DATA\LG\GY-3-132\GY-3-132 2019-04-09 15-22-08\092-0601.D  
Sample Name: LJ-129-10

```
=====
Acq. Operator   :                               Seq. Line :    6
Acq. Instrument : Instrument 2                  Location  : Vial 92
Injection Date  : 4/9/2019 5:43:24 PM          Inj       :    1
                                                Inj Volume: 5.000 µl
Acq. Method     : D:\DATA\LG\GY-3-132\GY-3-132 2019-04-09 15-22-08\DAD-0D(1-2)-95-5-1ML-
SUL-ALL-60MIN.M
Last changed    : 4/9/2019 6:21:57 PM
                (modified after loading)
Analysis Method : D:\METHOD\LG\DAD-0J(1-6)-80-20-1ML-5UL-ALL-60MIN.M
Last changed    : 4/14/2019 9:54:40 PM
                (modified after loading)
Additional Info : Peak(s) manually integrated
=====
```

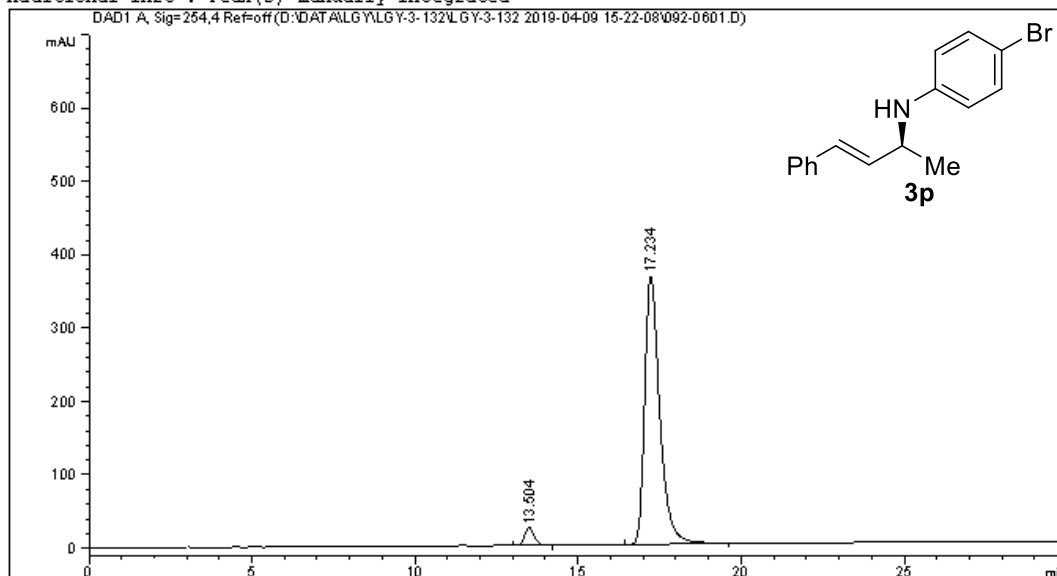

=====  
Area Percent Report  
=====

Sorted By : Signal  
Multiplier : 1.0000  
Dilution : 1.0000  
Use Multiplier & Dilution Factor with ISTDs

Signal 1: DAD1 A, Sig=254,4 Ref=off

| Peak # | RetTime [min] | Type | Width [min] | Area [mAU*s] | Height [mAU] | Area %  |
|--------|---------------|------|-------------|--------------|--------------|---------|
| 1      | 13.504        | BB   | 0.3190      | 496.94272    | 23.86341     | 4.0801  |
| 2      | 17.234        | BB   | 0.4827      | 1.16826e4    | 365.71744    | 95.9199 |

Totals : 1.21796e4 389.58085

Figure S170. HPLC spectra of 3p, related to Figure 3.

Data File D:\DATA\GUAN YUQING\LJ-110\LJ-110-2 2019-03-14 22-06-29\021-0601.D  
Sample Name: LJ-109-5

```
=====
Acq. Operator   :                               Seq. Line :    6
Acq. Instrument : Instrument 2                   Location  : Vial 21
Injection Date  : 3/14/2019 11:32:48 PM         Inj       :    1
                                                    Inj Volume: 5.000 µl
Acq. Method     : D:\DATA\GUAN YUQING\LJ-110\LJ-110-2 2019-03-14 22-06-29\DAD-OD(1-2)-90-10-0
                  .SML-SUL-ALL-30MIN.M
Last changed    : 10/30/2018 11:03:07 PM
Analysis Method : D:\METHOD\GUAN YUQING\LONGJIAO\DAD-IA(1-6)-95-5-0.SML-SUL-ALL-40MIN.M
Last changed    : 3/19/2019 10:31:02 PM
                  (modified after loading)
Additional Info : Peak(s) manually integrated
=====
```

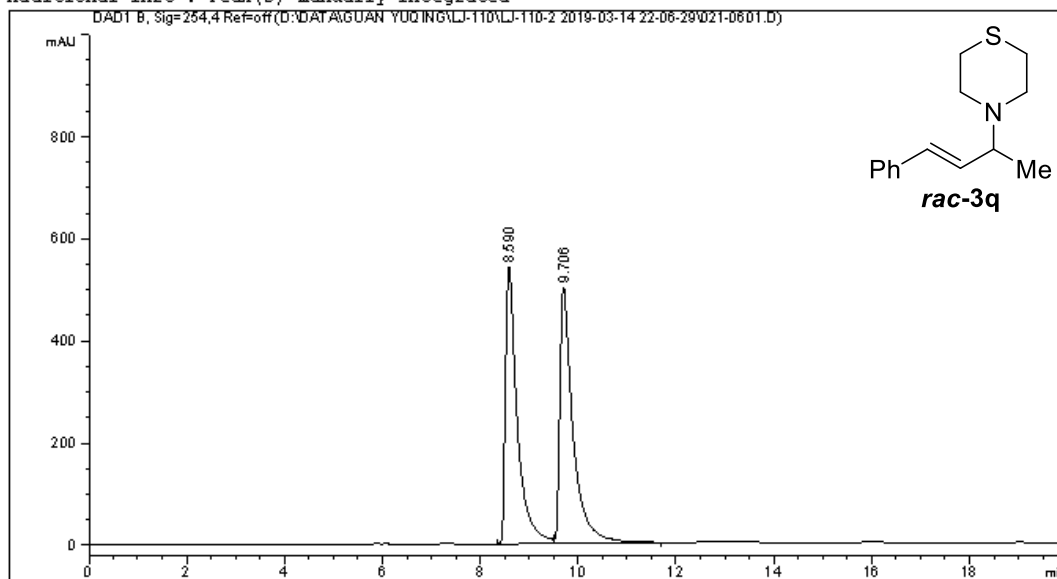

=====  
Area Percent Report  
=====

```
Sorted By      :      Signal
Multiplier     :      1.0000
Dilution       :      1.0000
Use Multiplier & Dilution Factor with ISTDs
```

Signal 1: DAD1 B, Sig=254,4 Ref=off

| Peak # | RetTime [min] | Type | Width [min] | Area [mAU*s] | Height [mAU] | Area %  |
|--------|---------------|------|-------------|--------------|--------------|---------|
| 1      | 8.590         | BV   | 0.2446      | 9138.08984   | 542.15143    | 49.1392 |
| 2      | 9.706         | VB   | 0.2699      | 9458.22656   | 501.71347    | 50.8608 |

Totals :                                    1.85963e4  1043.86490

Figure S171. HPLC spectra of *rac-3q*, related to Figure 3.

Data File D:\DATA\GUAN YUQING\LJ-110\LJ-110-2 2019-03-14 22-06-29\023-0801.D  
Sample Name: LJ-110-5

```
=====
Acq. Operator   :                               Seq. Line :    8
Acq. Instrument : Instrument 2                   Location  : Vial 23
Injection Date  : 3/15/2019 12:34:45 AM         Inj       :    1
                                                    Inj Volume: 5.000 µl

Acq. Method     : D:\DATA\GUAN YUQING\LJ-110\LJ-110-2 2019-03-14 22-06-29\DAD-OD(1-2)-90-10-0
                  .SML-SUL-ALL-30MIN.M
Last changed    : 10/30/2018 11:03:07 PM
Analysis Method : D:\METHOD\GUAN YUQING\LONGJIAO\DAD-IA(1-6)-95-5-0.SML-SUL-ALL-40MIN.M
Last changed    : 3/19/2019 10:29:50 PM
                  (modified after loading)
Additional Info : Peak(s) manually integrated
=====
```

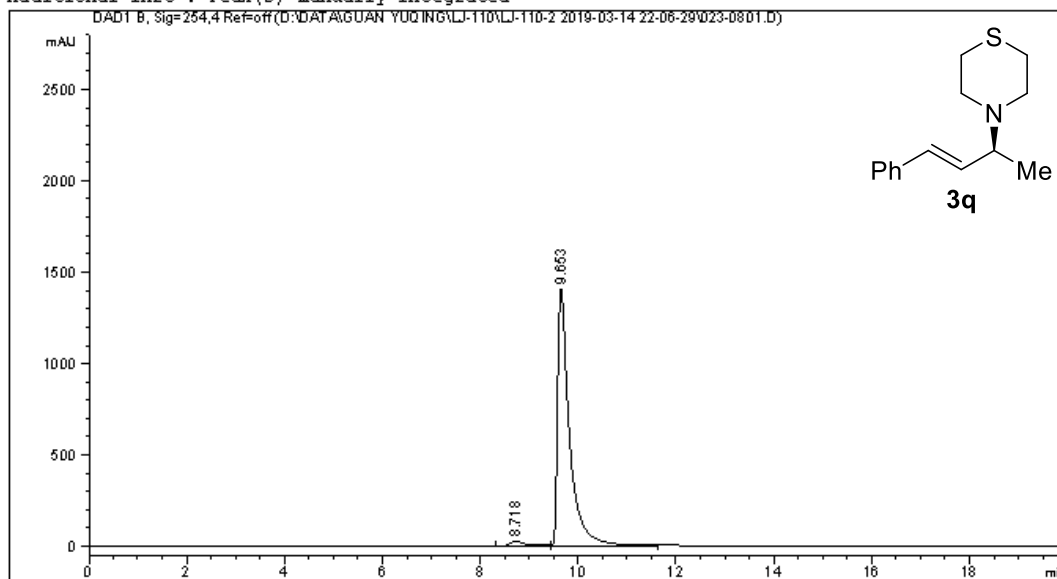

=====  
Area Percent Report  
=====

```
Sorted By      :      Signal
Multiplier     :      1.0000
Dilution       :      1.0000
Use Multiplier & Dilution Factor with ISTDs
```

Signal 1: DAD1 B, Sig=254,4 Ref=off

| Peak # | RetTime [min] | Type | Width [min] | Area [mAU*s] | Height [mAU] | Area %  |
|--------|---------------|------|-------------|--------------|--------------|---------|
| 1      | 8.718         | BV   | 0.3143      | 527.30475    | 24.37941     | 2.1601  |
| 2      | 9.653         | VB   | 0.2483      | 2.38843e4    | 1404.88000   | 97.8399 |

Totals :                                   2.44116e4 1429.25941

Figure S172. HPLC spectra of 3q, related to Figure 3.

Data File D:\DATA\GUAN YUQING\LJ-105-11-OD\LJ-106-6 2019-03-08 19-55-22\001-0201.D  
 Sample Name: LJ-106-6-RAC

```

=====
Acq. Operator   :                               Seq. Line :    2
Acq. Instrument : Instrument 2                 Location  : Vial 1
Injection Date  : 3/8/2019 8:07:24 PM        Inj       :    1
                                           Inj Volume: 2.000 µl

Acq. Method     : D:\DATA\GUAN YUQING\LJ-105-11-OD\LJ-106-6 2019-03-08 19-55-22\DAD-OD (1-2)-
99-1-0.5ML-2UL-ALL-40MIN.M
Last changed    : 3/8/2019 8:20:08 PM
                 (modified after loading)

Analysis Method : D:\METHOD\YANG JIAXIN\DAD-0J(1-6)-90-10-1ML-3UL-ALL-40MIN.M
Last changed    : 3/8/2019 9:25:14 PM
                 (modified after loading)

Additional Info : Peak(s) manually integrated
  
```

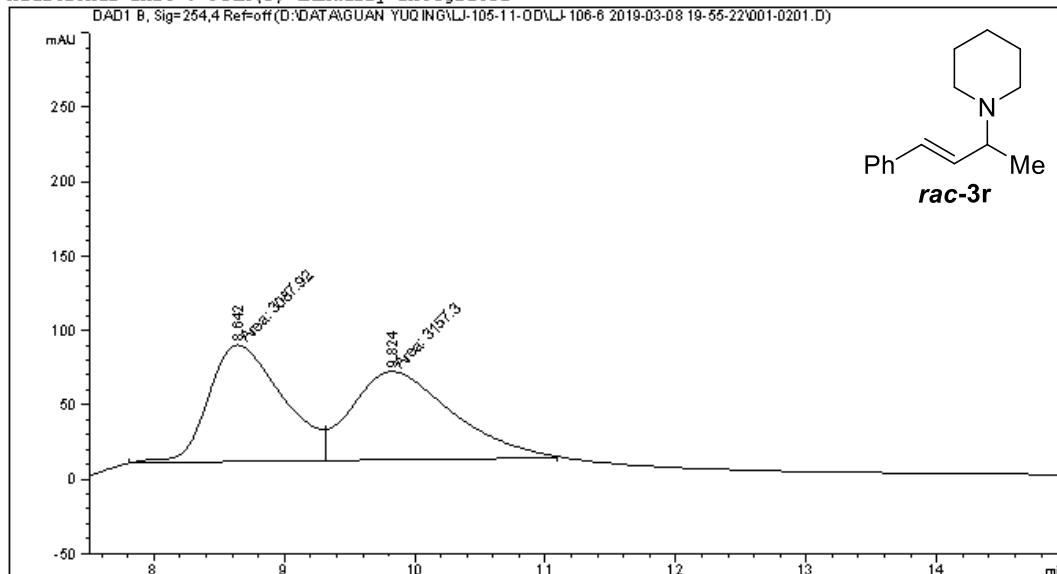

Area Percent Report

```

Sorted By      : Signal
Multiplier     : 1.0000
Dilution      : 1.0000
Use Multiplier & Dilution Factor with ISTDs
  
```

Signal 1: DAD1 E, Sig=254,4 Ref=off

| Peak # | RetTime [min] | Type | Width [min] | Area [mAU*s] | Height [mAU] | Area %  |
|--------|---------------|------|-------------|--------------|--------------|---------|
| 1      | 8.642         | MF   | 0.6583      | 3087.92310   | 78.17834     | 49.4446 |
| 2      | 9.824         | FM   | 0.8897      | 3157.29639   | 59.14474     | 50.5554 |

Totals : 6245.21948 137.32309

Figure S173. HPLC spectra of rac-3r, related to Figure 3.



Data File D:\DATA\GUAN YUQING\LJ-105-11-OD\LJ-106-6 2019-03-08 19-55-22\002-0301.D  
Sample Name: LJ-106-6

```
=====
Acq. Operator   :                               Seq. Line :    3
Acq. Instrument : Instrument 2                   Location  : Vial 2
Injection Date  : 3/8/2019 8:28:20 PM           Inj       :    1
                                                    Inj Volume: 2.000 µl

Acq. Method     : D:\DATA\GUAN YUQING\LJ-105-11-OD\LJ-106-6 2019-03-08 19-55-22\DAD-OD (1-2)-
                  99-1-0.5ML-2UL-ALL-40MIN.M
Last changed    : 3/8/2019 8:20:08 PM
                  (modified after loading)
Analysis Method : D:\METHOD\YANG JIAXIN\DAD-0J(1-6)-90-10-1ML-3UL-ALL-40MIN.M
Last changed    : 3/8/2019 9:25:14 PM
                  (modified after loading)
Additional Info : Peak(s) manually integrated
=====
```

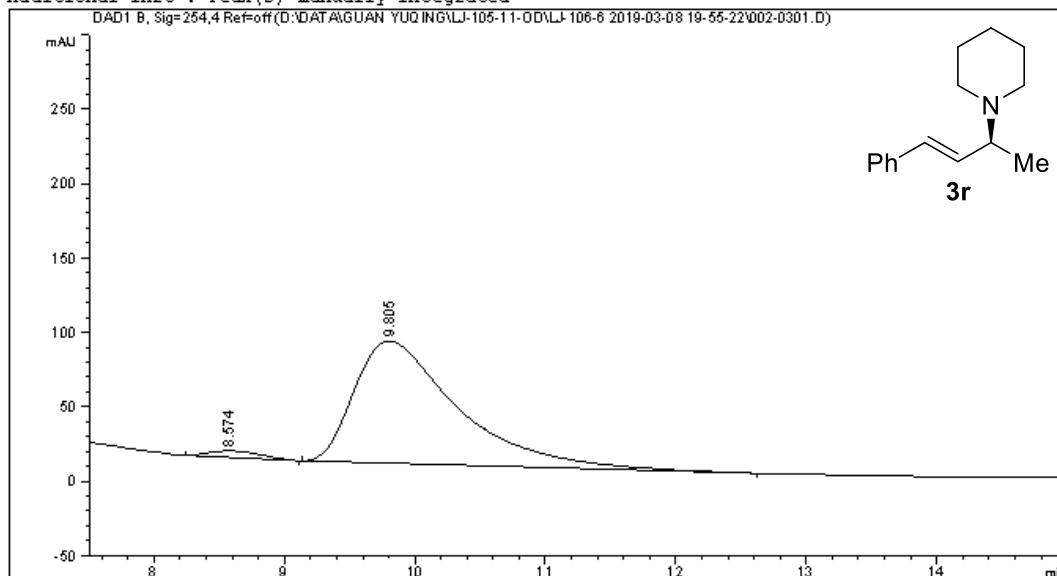

=====  
Area Percent Report  
=====

```
Sorted By      :      Signal
Multiplier     :      1.0000
Dilution       :      1.0000
Use Multiplier & Dilution Factor with ISTDs
```

Signal 1: DAD1 B, Sig=254,4 Ref=off

| Peak # | RetTime [min] | Type | Width [min] | Area [mAU*s] | Height [mAU] | Area %  |
|--------|---------------|------|-------------|--------------|--------------|---------|
| 1      | 8.574         | BB   | 0.3580      | 118.74886    | 4.30188      | 2.5651  |
| 2      | 9.805         | BB   | 0.7912      | 4510.67627   | 82.06714     | 97.4349 |

Totals :                    4629.42513    86.36902

Instrument 2 3/8/2019 9:26:43 PM

Page 1 of 2

**Figure S174.** HPLC spectra of **3r**, related to **Figure 3**.

Data File D:\DATA\GUAN YUQING\LJ-155\LJ-155 2019-05-03 17-00-25\065-0801.D  
Sample Name: LJ-108-4-RAC

```
=====
Acq. Operator   :                               Seq. Line :    8
Acq. Instrument : Instrument 2                   Location  : Vial 65
Injection Date  : 5/3/2019 9:52:17 PM           Inj       :    1
                                                    Inj Volume: 5.000 µl
Acq. Method     : D:\DATA\GUAN YUQING\LJ-155\LJ-155 2019-05-03 17-00-25\DAD-OD(1-2)-95-5-0.
                  SML-5UL-ALL-40MIN.M
Last changed    : 5/3/2019 10:02:26 PM
                  (modified after loading)
Analysis Method : D:\DATA\GUAN YUQING\LJ-155\LJ-155 2019-05-03 17-00-25\DAD-OD(1-2)-95-5-0.
                  SML-5UL-ALL-40MIN.M (Sequence Method)
Last changed    : 5/4/2019 9:40:19 AM
                  (modified after loading)
Additional Info  : Peak(s) manually integrated
=====
```

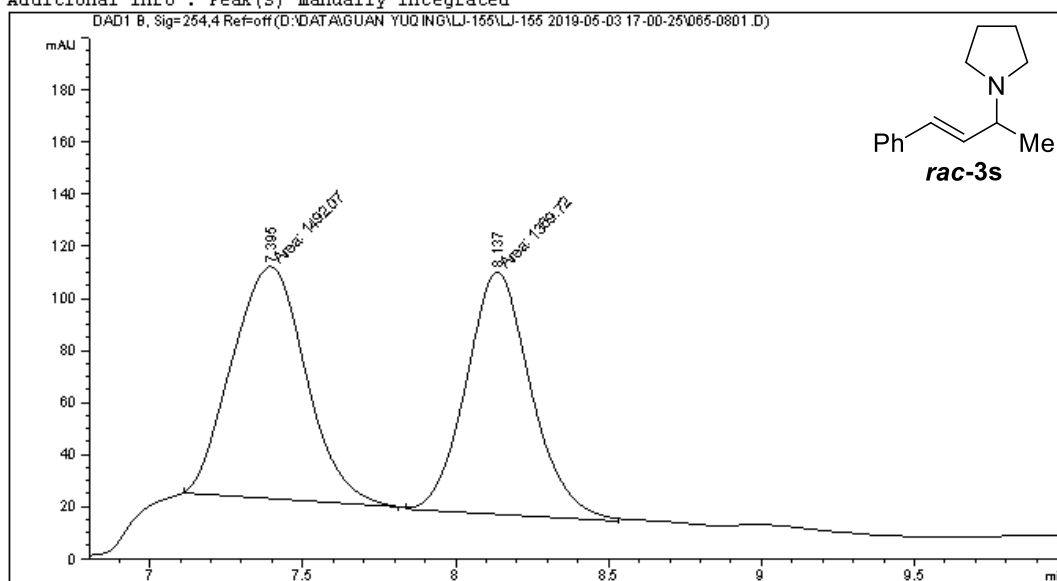

=====  
Area Percent Report  
=====

Sorted By : Signal  
Multiplier : 1.0000  
Dilution : 1.0000  
Use Multiplier & Dilution Factor with ISTDs

Signal 1: DAD1 B, Sig=254,4 Ref=off

| Peak # | RetTime [min] | Type | Width [min] | Area [mAU*s] | Height [mAU] | Area %  |
|--------|---------------|------|-------------|--------------|--------------|---------|
| 1      | 7.395         | MM   | 0.2795      | 1492.07043   | 88.97803     | 52.1377 |
| 2      | 8.137         | MM   | 0.2450      | 1369.72009   | 93.17516     | 47.8623 |

Totals : 2861.79053 182.15319

Instrument 2 5/4/2019 9:40:34 AM

Page 1 of 2

Figure S175. HPLC spectra of *rac-3s*, related to Figure 3.

Data File D:\DATA\GUAN YUQING\LJ-155\LJ-155 2019-05-03 17-00-25\066-0901.D  
 Sample Name: LJ-108-4

```

=====
Acq. Operator   :                               Seq. Line :    9
Acq. Instrument : Instrument 2                 Location  : Vial 66
Injection Date  : 5/3/2019 10:13:18 PM        Inj       :    1
                                           Inj Volume: 5.000 µl

Acq. Method     : D:\DATA\GUAN YUQING\LJ-155\LJ-155 2019-05-03 17-00-25\DAD-OD(1-2)-95-5-0.
                  SML-5UL-ALL-40MIN.M
Last changed    : 5/3/2019 10:02:26 PM
                  (modified after loading)
Analysis Method : D:\DATA\GUAN YUQING\LJ-155\LJ-155 2019-05-03 17-00-25\DAD-OD(1-2)-95-5-0.
                  SML-5UL-ALL-40MIN.M (Sequence Method)
Last changed    : 5/4/2019 9:54:17 AM
                  (modified after loading)
Additional Info : Peak(s) manually integrated
  
```

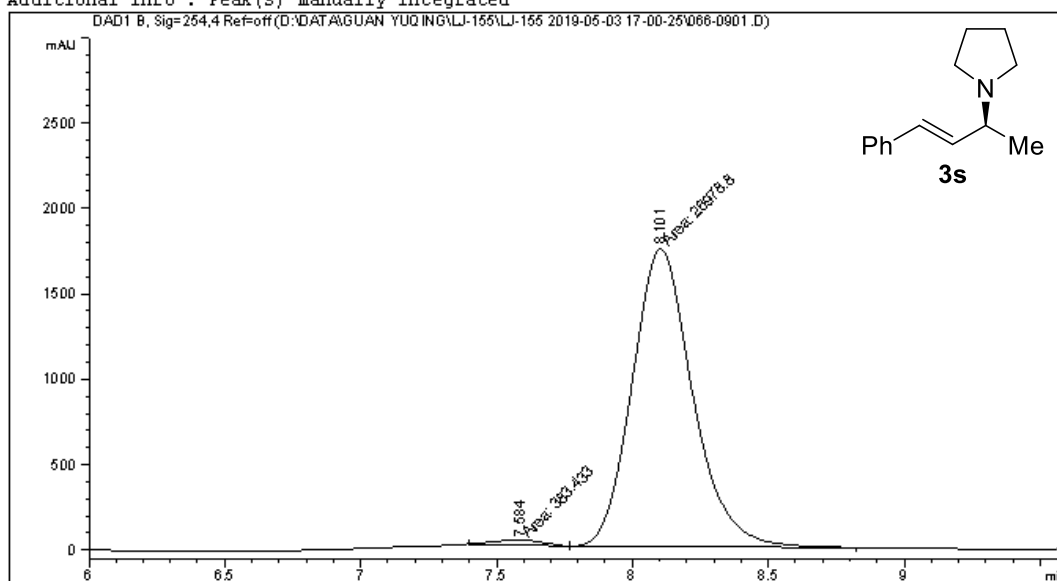

=====  
 Area Percent Report  
 =====

```

Sorted By      :      Signal
Multiplier     :      1.0000
Dilution      :      1.0000
Use Multiplier & Dilution Factor with ISTDs
  
```

Signal 1: DAD1 B, Sig=254,4 Ref=off

| Peak # | RetTime [min] | Type | Width [min] | Area [mAU*s] | Height [mAU] | Area %  |
|--------|---------------|------|-------------|--------------|--------------|---------|
| 1      | 7.584         | MF   | 0.2171      | 383.43253    | 29.43110     | 1.4013  |
| 2      | 8.101         | FM   | 0.2581      | 2.69788e4    | 1742.11572   | 98.5987 |

Totals :                    2.73622e4  1771.54683

**Figure S176.** HPLC spectra of **3s**, related to **Figure 3**.

Data File D:\DATA\GUAN YUQING\LJ-110\LJ-110-2 2019-03-14 22-06-29\013-0401.D  
Sample Name: LJ-110-2-RAC

```
=====
Acq. Operator   :                               Seq. Line :    4
Acq. Instrument : Instrument 2                   Location  : Vial 13
Injection Date  : 3/14/2019 11:00:40 PM         Inj       :    1
                                                    Inj Volume: 5.000 µl
Acq. Method     : D:\DATA\GUAN YUQING\LJ-110\LJ-110-2 2019-03-14 22-06-29\DAD-OD(1-2)-95-5-0.
                  SML-5UL-ALL-20MIN.M
Last changed    : 3/4/2019 3:12:24 PM
Analysis Method : D:\METHOD\GUAN YUQING\LONGJIAO\DAD-IA(1-6)-95-5-0.SML-5UL-ALL-40MIN.M
Last changed    : 3/19/2019 10:24:44 PM
                  (modified after loading)
Additional Info : Peak(s) manually integrated
=====
```

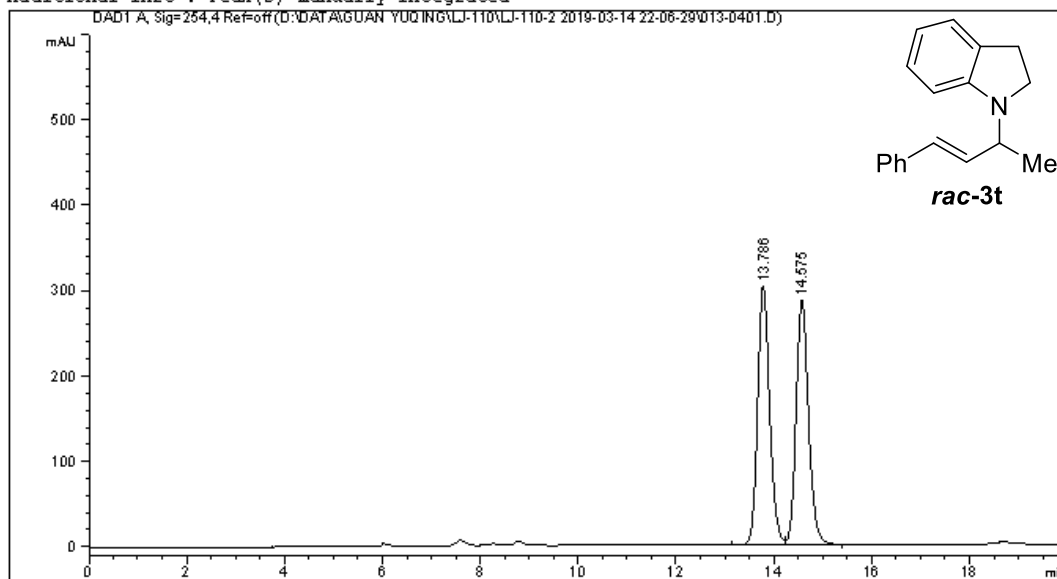

=====  
Area Percent Report  
=====

```
Sorted By      :      Signal
Multiplier     :      1.0000
Dilution       :      1.0000
Use Multiplier & Dilution Factor with ISTDs
```

Signal 1: DAD1 A, Sig=254,4 Ref=off

| Peak # | RetTime [min] | Type | Width [min] | Area [mAU*s] | Height [mAU] | Area %  |
|--------|---------------|------|-------------|--------------|--------------|---------|
| 1      | 13.786        | BV   | 0.2600      | 5142.11768   | 303.06146    | 50.4431 |
| 2      | 14.575        | VB   | 0.2721      | 5051.77002   | 285.98007    | 49.5569 |

Totals :                                    1.01939e4    589.04153

Figure S177. HPLC spectra of *rac-3t*, related to Figure 3.

Data File D:\DATA\GUAN YUQING\LJ-110\LJ-110-2 2019-03-14 22-06-29\011-0201.D  
Sample Name: LJ-110-2

```
=====
Acq. Operator   :                               Seq. Line :    2
Acq. Instrument : Instrument 2                  Location  : Vial 11
Injection Date  : 3/14/2019 10:18:39 PM       Inj       :    1
                                                Inj Volume: 5.000 µl
Acq. Method     : D:\DATA\GUAN YUQING\LJ-110\LJ-110-2 2019-03-14 22-06-29\DAD-OD(1-2)-95-5-0.
                                                SML-5UL-ALL-20MIN.M
Last changed    : 3/4/2019 3:12:24 PM
Analysis Method : D:\METHOD\GUAN YUQING\LONGJIAO\DAD-IA(1-6)-95-5-0.SML-5UL-ALL-40MIN.M
Last changed    : 3/19/2019 10:26:50 PM
                (modified after loading)
Additional Info : Peak(s) manually integrated
=====
```

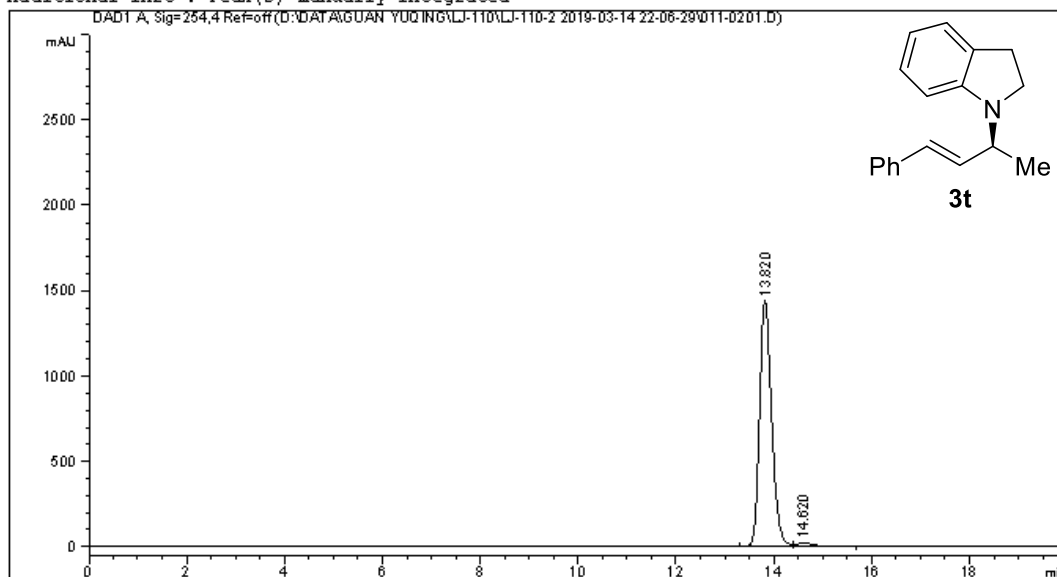

=====  
Area Percent Report  
=====

```
Sorted By      :      Signal
Multiplier     :      1.0000
Dilution       :      1.0000
Use Multiplier & Dilution Factor with ISTDs
```

Signal 1: DAD1 A, Sig=254,4 Ref=off

| Peak # | RetTime [min] | Type | Width [min] | Area [mAU*s] | Height [mAU] | Area %  |
|--------|---------------|------|-------------|--------------|--------------|---------|
| 1      | 13.820        | BV   | 0.2600      | 2.43711e4    | 1436.18689   | 98.4123 |
| 2      | 14.620        | VB   | 0.2869      | 393.19205    | 20.21956     | 1.5877  |

Totals :                                    2.47643e4  1456.40645

Figure S178. HPLC spectra of 3t, related to Figure 3.

Data File D:\DATA\GUAN YUQING\LJ-113-1\LJ-113-1 2019-03-23 12-44-07\083-0701.D  
Sample Name: LJ-113-2-RAC

```
=====
Acq. Operator   :                               Seq. Line :    7
Acq. Instrument : Instrument 2                   Location  : Vial 83
Injection Date  : 3/23/2019 2:54:08 PM          Inj       :    1
                                                    Inj Volume: 5.000 µl
Acq. Method     : D:\DATA\GUAN YUQING\LJ-113-1\LJ-113-1 2019-03-23 12-44-07\DAD-OD(1-2)-95-5-
                  0.5ML-SUL-ALL-60MIN.M
Last changed    : 3/23/2019 3:10:35 PM
                  (modified after loading)
Analysis Method : D:\METHOD\XZC\DAD-OD(1-2)-95-5-1ML-SUL-ALL-50MIN.M
Last changed    : 3/23/2019 4:04:01 PM
                  (modified after loading)
Additional Info : Peak(s) manually integrated
=====
```

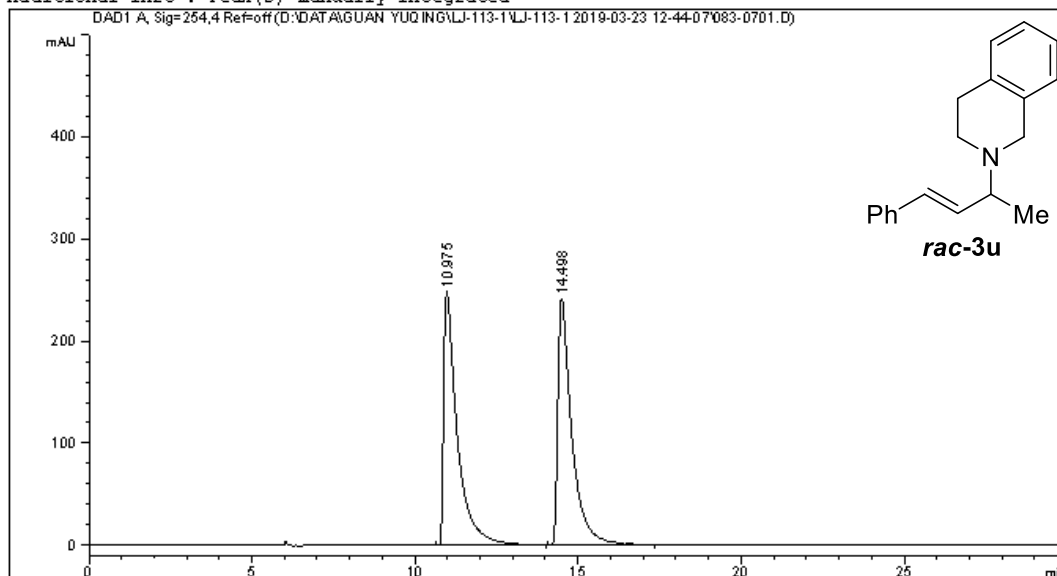

=====  
Area Percent Report  
=====

Sorted By : Signal  
Multiplier : 1.0000  
Dilution : 1.0000  
Use Multiplier & Dilution Factor with ISTDs

Signal 1: DAD1 A, Sig=254,4 Ref=off

| Peak # | RetTime [min] | Type | Width [min] | Area [mAU*s] | Height [mAU] | Area %  |
|--------|---------------|------|-------------|--------------|--------------|---------|
| 1      | 10.975        | BB   | 0.4104      | 7225.67285   | 249.14714    | 50.1755 |
| 2      | 14.498        | BB   | 0.4295      | 7175.11523   | 240.88791    | 49.8245 |

Totals : 1.44008e4 490.03505

Instrument 2 3/23/2019 4:04:14 PM

Page 1 of 2

Figure S179. HPLC spectra of *rac-3u*, related to Figure 3.

Data File D:\DATA\GUAN YUQING\LJ-113-1\LJ-113-1 2019-03-23 12-44-07\084-0801.D  
Sample Name: LJ-113-2

```
=====
Acq. Operator   :                               Seq. Line :    8
Acq. Instrument : Instrument 2                   Location  : Vial 84
Injection Date  : 3/23/2019 3:25:10 PM          Inj       :    1
                                                    Inj Volume: 5.000 µl
Acq. Method     : D:\DATA\GUAN YUQING\LJ-113-1\LJ-113-1 2019-03-23 12-44-07\DAD-OD(1-2)-95-5-
                  0.5ML-SUL-ALL-60MIN.M
Last changed    : 3/23/2019 3:10:35 PM
                  (modified after loading)
Analysis Method : D:\METHOD\XZC\DAD-OD(1-2)-95-5-1ML-SUL-ALL-50MIN.M
Last changed    : 3/23/2019 4:06:28 PM
                  (modified after loading)
Additional Info : Peak(s) manually integrated
=====
```

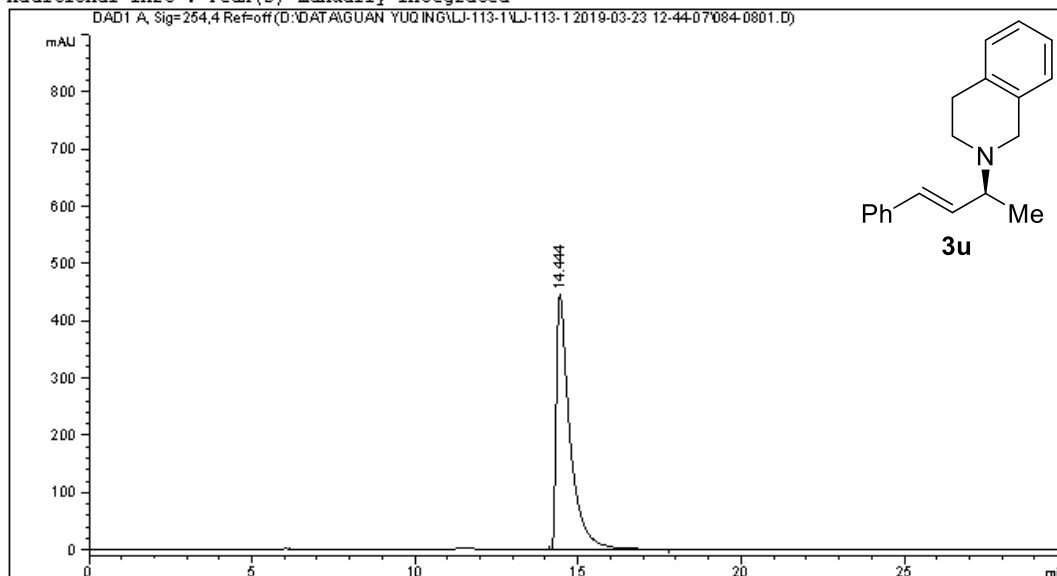

=====  
Area Percent Report  
=====

Sorted By : Signal  
Multiplier : 1.0000  
Dilution : 1.0000  
Use Multiplier & Dilution Factor with ISTDs

Signal 1: DAD1 A, Sig=254,4 Ref=off

| Peak # | RetTime [min] | Type | Width [min] | Area [mAU*s] | Height [mAU] | Area %   |
|--------|---------------|------|-------------|--------------|--------------|----------|
| 1      | 14.444        | BB   | 0.4151      | 1.30190e4    | 447.92014    | 100.0000 |

Totals : 1.30190e4 447.92014

**Figure S180.** HPLC spectra of *rac*-3u, related to **Figure 3**.

Data File D:\DATA\GUAN YUQING\LJ-158-1\LJ-158-1 2019-05-09 21-57-47\052-0401.D  
Sample Name: LJ-158-1-RAC

```
=====
Acq. Operator   :                               Seq. Line :    4
Acq. Instrument : Instrument 1                   Location  : Vial 52
Injection Date  : 5/9/2019 11:02:38 PM          Inj       :    1
                                                    Inj Volume: 5.000 µl
Acq. Method     : D:\DATA\GUAN YUQING\LJ-158-1\LJ-158-1 2019-05-09 21-57-47\VWD-AD(1-2)-95-5-
                  0.5ML-5UL-254NM-30MIN.M
Last changed    : 4/9/2019 4:22:03 PM
Analysis Method : D:\METHOD\LG\VWD-AD(1-2)-100-0-0.2ML-1UL-220NM-100MIN.M
Last changed    : 5/10/2019 2:56:18 PM
                  (modified after loading)
Additional Info  : Peak(s) manually integrated
=====
```

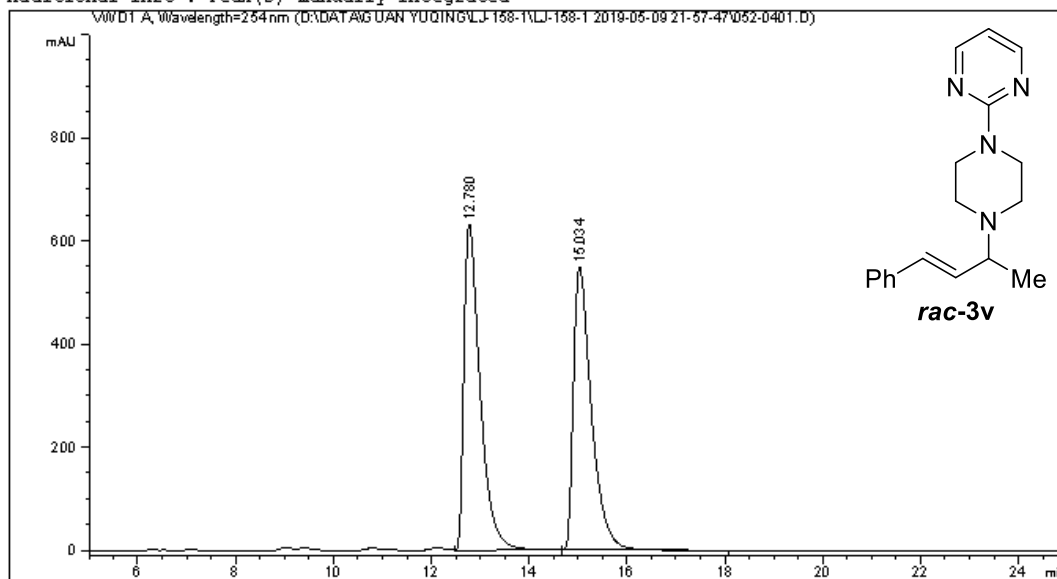

=====  
Area Percent Report  
=====

```
Sorted By      :      Signal
Multiplier     :      1.0000
Dilution       :      1.0000
Use Multiplier & Dilution Factor with ISTDs
```

Signal 1: VWD1 A, Wavelength=254 nm

| Peak # | RetTime [min] | Type | Width [min] | Area [mAU*s] | Height [mAU] | Area %  |
|--------|---------------|------|-------------|--------------|--------------|---------|
| 1      | 12.780        | VB   | 0.3437      | 1.44385e4    | 631.57111    | 50.8506 |
| 2      | 15.034        | BB   | 0.3822      | 1.39554e4    | 547.74023    | 49.1494 |

Totals :                                    2.83939e4 1179.31134

Figure S181. HPLC spectra of *rac-3v*, related to Figure 3.



Data File D:\DATA\GUAN YUQING\LJ-158-1\LJ-158-1 2019-05-09 21-57-47\051-0301.D  
Sample Name: LJ-158-1

```
=====
Acq. Operator   :                               Seq. Line :    3
Acq. Instrument : Instrument 1                  Location  : Vial 51
Injection Date  : 5/9/2019 10:31:48 PM         Inj       :    1
                                                Inj Volume: 5.000 µl
Acq. Method     : D:\DATA\GUAN YUQING\LJ-158-1\LJ-158-1 2019-05-09 21-57-47\VWD-AD(1-2)-95-5-
                  0.5ML-SUL-254NM-30MIN.M
Last changed    : 4/9/2019 4:22:03 PM
Analysis Method : D:\METHOD\LG\VWD-AD(1-2)-100-0-0.2ML-1UL-220NM-100MIN.M
Last changed    : 5/10/2019 2:57:58 PM
                  (modified after loading)
Additional Info : Peak(s) manually integrated
=====
```

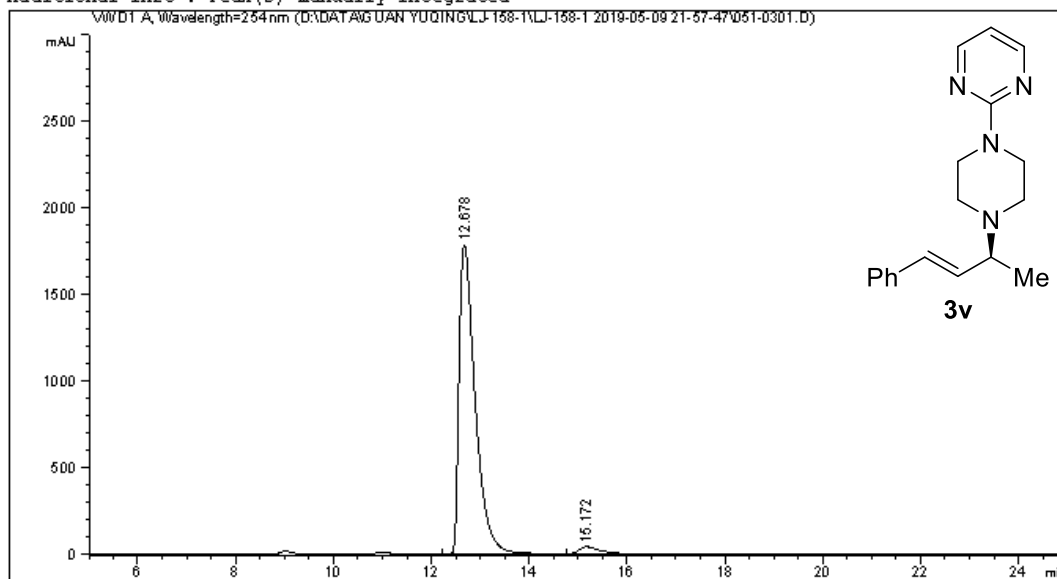

=====  
Area Percent Report  
=====

```
Sorted By      :      Signal
Multiplier     :      1.0000
Dilution       :      1.0000
Use Multiplier & Dilution Factor with ISTDs
```

Signal 1: VWD1 A, Wavelength=254 nm

| Peak # | RetTime [min] | Type | Width [min] | Area [mAU*s] | Height [mAU] | Area %  |
|--------|---------------|------|-------------|--------------|--------------|---------|
| 1      | 12.678        | BV   | 0.3434      | 4.06017e4    | 1785.04187   | 97.2820 |
| 2      | 15.172        | VB   | 0.4279      | 1134.37378   | 39.75301     | 2.7180  |

Totals :                                   4.17361e4 1824.79488

Figure S182. HPLC spectra of 3v, related to Figure 3.

Data File D:\DATA\GUAN YUQING\LJ-137-3\LJ-137-3 2019-04-16 16-30-33\072-0601.D  
 Sample Name: LJ-137-3-RAC

```

=====
Acq. Operator   :                               Seq. Line :    6
Acq. Instrument : Instrument 2                  Location  : Vial 72
Injection Date  : 4/16/2019 5:30:41 PM        Inj       :    1
                                                Inj Volume: 5.000 µl

Acq. Method     : D:\DATA\GUAN YUQING\LJ-137-3\LJ-137-3 2019-04-16 16-30-33\DAD-0D(1-2)-99-1-
                  0.5ML-SUL-ALL-40MIN.M
Last changed    : 4/16/2019 5:44:26 PM
                  (modified after loading)
Analysis Method : D:\DATA\GUAN YUQING\LJ-137-3\LJ-137-3 2019-04-16 16-30-33\DAD-0D(1-2)-99-1-
                  0.5ML-SUL-ALL-40MIN.M (Sequence Method)
Last changed    : 4/17/2019 8:15:04 PM
                  (modified after loading)
Additional Info  : Peak(s) manually integrated
  
```

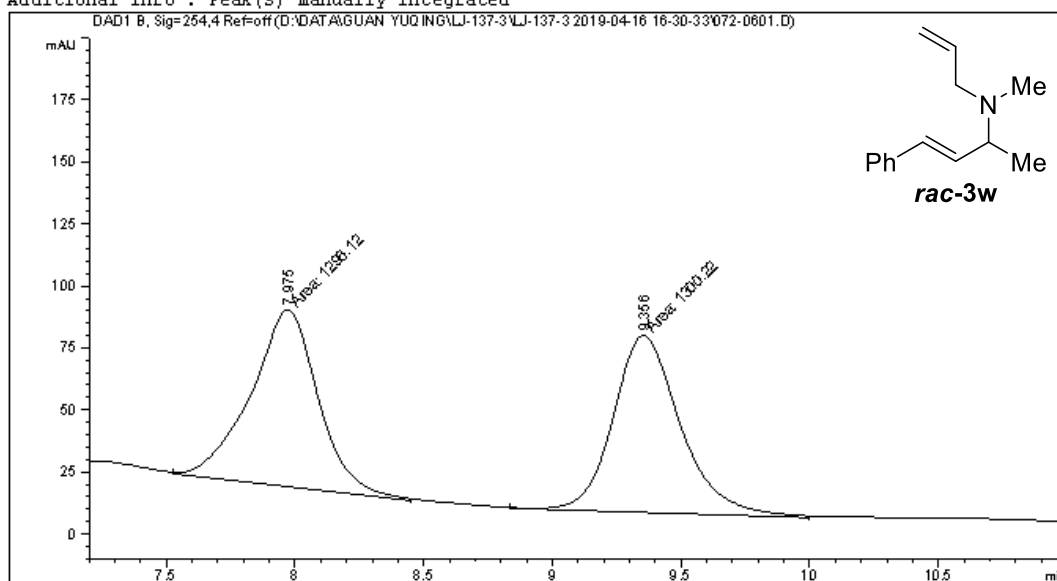

=====  
 Area Percent Report  
 =====

```

Sorted By      :      Signal
Multiplier     :      1.0000
Dilution      :      1.0000
Use Multiplier & Dilution Factor with ISTDs
  
```

Signal 1: DAD1 B, Sig=254,4 Ref=off

| Peak # | RetTime [min] | Type | Width [min] | Area [mAU*s] | Height [mAU] | Area %  |
|--------|---------------|------|-------------|--------------|--------------|---------|
| 1      | 7.975         | MM   | 0.3028      | 1296.12183   | 71.34225     | 49.9210 |
| 2      | 9.356         | MM   | 0.3030      | 1300.22363   | 71.51093     | 50.0790 |

Totals :                    2596.34546   142.85318

**Figure S183.** HPLC spectra of *rac-3w*, related to **Figure 3**.

Data File D:\DATA\GUAN YUQING\LJ-137-3\LJ-137-3 2019-04-16 16-30-33\071-0701.D  
Sample Name: LJ-137-3

```
=====
Acq. Operator   :                               Seq. Line :    7
Acq. Instrument : Instrument 2                   Location  : Vial 71
Injection Date  : 4/16/2019 5:51:42 PM          Inj       :    1
                                                    Inj Volume: 5.000 µl
Acq. Method     : D:\DATA\GUAN YUQING\LJ-137-3\LJ-137-3 2019-04-16 16-30-33\DAD-OD(1-2)-99-1-
                  0.5ML-SUL-ALL-40MIN.M
Last changed    : 4/16/2019 5:44:26 PM
                  (modified after loading)
Analysis Method : D:\DATA\GUAN YUQING\LJ-137-3\LJ-137-3 2019-04-16 16-30-33\DAD-OD(1-2)-99-1-
                  0.5ML-SUL-ALL-40MIN.M (Sequence Method)
Last changed    : 4/17/2019 8:20:23 PM
                  (modified after loading)
Additional Info : Peak(s) manually integrated
=====
```

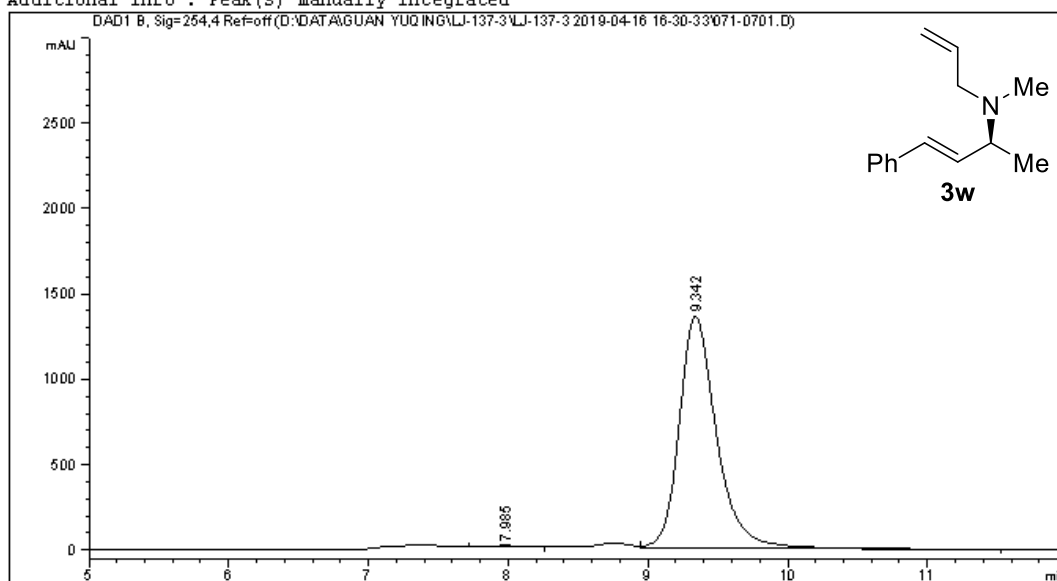

=====  
Area Percent Report  
=====

Sorted By : Signal  
Multiplier : 1.0000  
Dilution : 1.0000  
Use Multiplier & Dilution Factor with ISTDs

Signal 1: DAD1 B, Sig=254,4 Ref=off

| Peak # | RetTime [min] | Type | Width [min] | Area [mAU*s] | Height [mAU] | Area %  |
|--------|---------------|------|-------------|--------------|--------------|---------|
| 1      | 7.985         | BB   | 0.2119      | 103.08399    | 7.24746      | 0.4068  |
| 2      | 9.342         | VB   | 0.2788      | 2.52373e4    | 1357.84119   | 99.5932 |

Totals : 2.53404e4 1365.08865

Instrument 2 4/17/2019 8:20:29 PM

Page 1 of 2

**Figure S184.** HPLC spectra of **3w**, related to **Figure 3**.



Data File D:\DATA\XZC\XZC-DATA-4\XZC-20190327-1 2019-03-27 13-36-36\062-1101.D  
Sample Name: LJ-113-1

```
=====
Acq. Operator   :                               Seq. Line :   11
Acq. Instrument : Instrument 2                  Location  : Vial 62
Injection Date  : 3/27/2019 11:58:01 PM        Inj       :    1
                                                Inj Volume: 5.000 µl
Acq. Method     : D:\DATA\XZC\XZC-DATA-4\XZC-20190327-1 2019-03-27 13-36-36\DAD-0D(1-2)-90-10
                  -1ML-5UL-ALL-20MIN.M
Last changed    : 12/25/2018 5:41:36 PM
Analysis Method : D:\METHOD\LG\DAD-0J(1-6)-80-20-1ML-5UL-ALL-60MIN.M
Last changed    : 4/14/2019 9:24:48 PM
                  (modified after loading)
=====
```

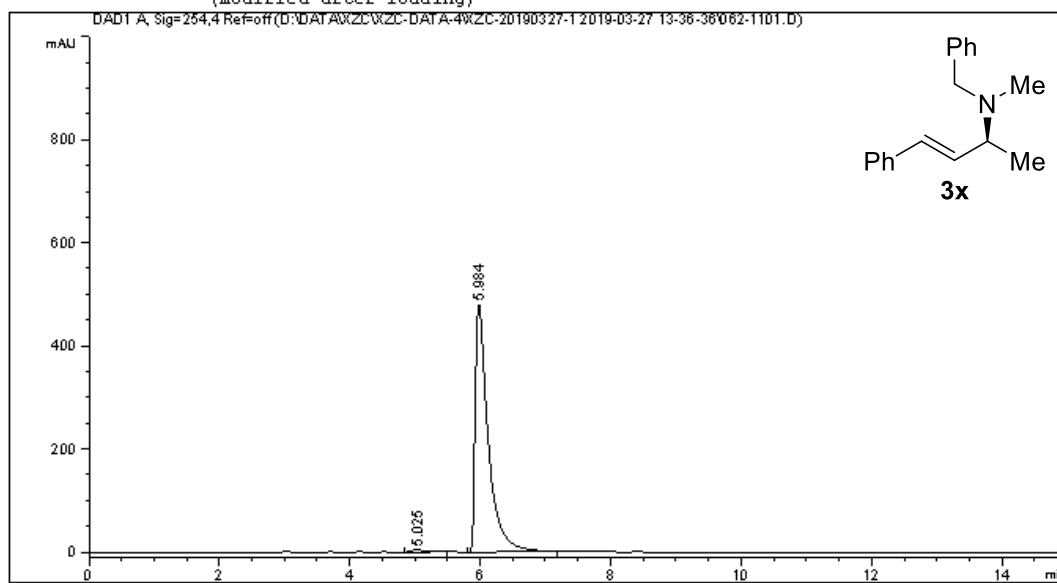

=====  
Area Percent Report  
=====

```
Sorted By      :      Signal
Multiplier     :      1.0000
Dilution       :      1.0000
Use Multiplier & Dilution Factor with ISTDs
```

Signal 1: DAD1 A, Sig=254,4 Ref=off

| Peak # | RetTime [min] | Type | Width [min] | Area [mAU*s] | Height [mAU] | Area %  |
|--------|---------------|------|-------------|--------------|--------------|---------|
| 1      | 5.025         | BB   | 0.2364      | 70.61983     | 4.46831      | 1.0636  |
| 2      | 5.984         | BB   | 0.1998      | 6568.77344   | 479.64868    | 98.9364 |

Totals :                    6639.39326   484.11699

Instrument 2 4/14/2019 9:24:53 PM

Page 1 of 1

Figure S186. HPLC spectra of 3x, related to Figure 3.

Data File D:\DATA\GUAN YUQING\LJ-106\LJ-106 2019-03-06 23-11-49\012-1001.D  
 Sample Name: LJ-103-4-RAC

```

=====
Acq. Operator   :                               Seq. Line :   10
Acq. Instrument : Instrument 2                 Location  : Vial 12
Injection Date  : 3/7/2019 2:17:08 AM        Inj       :    1
                                                Inj Volume: 5.000 µl
Acq. Method     : D:\DATA\GUAN YUQING\LJ-106\LJ-106 2019-03-06 23-11-49\DAD-OD(1-2)-95-5-0.
                                                SML-5UL-ALL-20MIN.M
Last changed    : 3/4/2019 3:12:24 PM
Analysis Method : D:\METHOD\GUAN YUQING\LONGJIAO\DAD-IA(1-6)-95-5-0.SML-5UL-ALL-40MIN.M
Last changed    : 3/19/2019 10:07:49 PM
                  (modified after loading)
Additional Info  : Peak(s) manually integrated
  
```

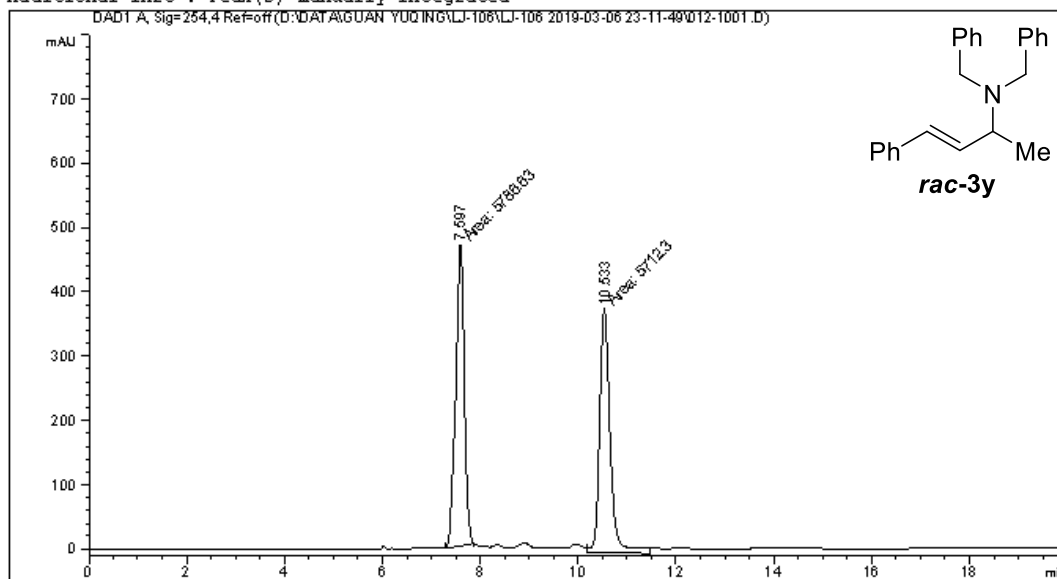

Area Percent Report

```

=====
Sorted By      :      Signal
Multiplier     :      1.0000
Dilution       :      1.0000
Use Multiplier & Dilution Factor with ISTDs
  
```

Signal 1: DAD1 A, Sig=254,4 Ref=off

| Peak # | RetTime [min] | Type | Width [min] | Area [mAU*s] | Height [mAU] | Area %  |
|--------|---------------|------|-------------|--------------|--------------|---------|
| 1      | 7.597         | MM   | 0.2056      | 5786.62988   | 469.13281    | 50.3232 |
| 2      | 10.533        | MM   | 0.2510      | 5712.29883   | 379.24442    | 49.6768 |

Totals : 1.14989e4 848.37723

Figure S187. HPLC spectra of *rac-3y*, related to Figure 3.

Data File D:\DATA\GUAN YUQING\LJ-106\LJ-106 2019-03-06 23-11-49\011-0901.D  
Sample Name: LJ-103-4

```
=====
Acq. Operator   :                               Seq. Line :    9
Acq. Instrument : Instrument 2                   Location  : Vial 11
Injection Date  : 3/7/2019 1:56:04 AM           Inj       :    1
                                                    Inj Volume: 5.000 µl
Acq. Method     : D:\DATA\GUAN YUQING\LJ-106\LJ-106 2019-03-06 23-11-49\DAD-OD(1-2)-95-5-0.
                  SML-SUL-ALL-20MIN.M
Last changed    : 3/4/2019 3:12:24 PM
Analysis Method : D:\METHOD\GUAN YUQING\LONGJIAO\DAD-IA(1-6)-95-5-0.SML-SUL-ALL-40MIN.M
Last changed    : 3/19/2019 10:11:39 PM
                  (modified after loading)
Additional Info : Peak(s) manually integrated
=====
```

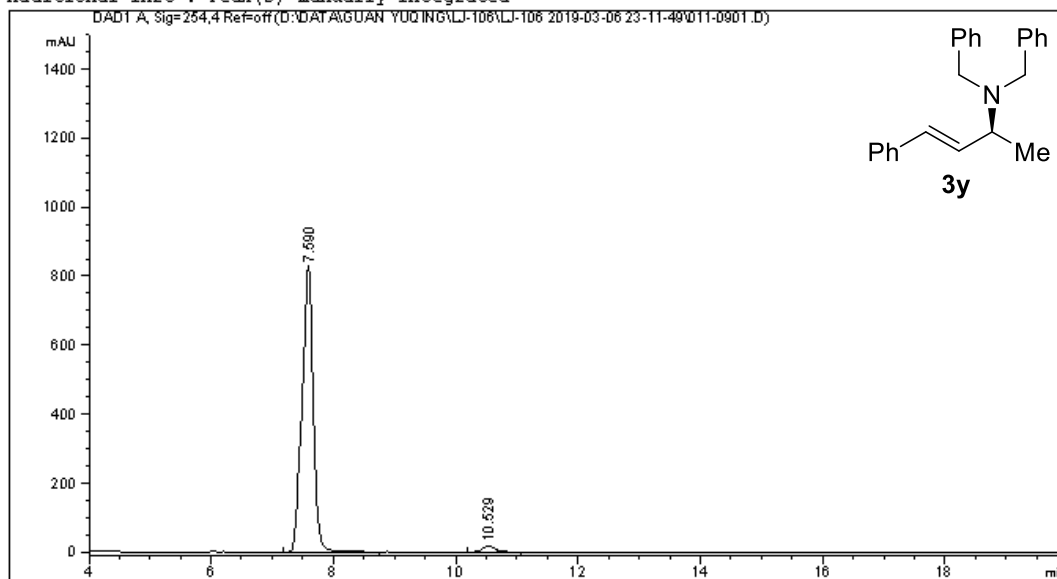

=====  
Area Percent Report  
=====

```
Sorted By      :      Signal
Multiplier     :      1.0000
Dilution       :      1.0000
Use Multiplier & Dilution Factor with ISTDs
```

Signal 1: DAD1 A, Sig=254,4 Ref=off

| Peak # | RetTime [min] | Type | Width [min] | Area [mAU*s] | Height [mAU] | Area %  |
|--------|---------------|------|-------------|--------------|--------------|---------|
| 1      | 7.590         | BB   | 0.1842      | 1.05131e4    | 827.54132    | 97.6746 |
| 2      | 10.529        | BB   | 0.2115      | 250.29330    | 18.30650     | 2.3254  |

Totals :                                   1.07634e4   845.84782

**Figure S188.** HPLC spectra of **3y**, related to **Figure 3**.





Data File D:\DATA\GUAN YUQING\LJ-2-26\LJ-2-26-1 2019-08-14 19-54-25\083-0601.D  
Sample Name: LJ-2-26-3

```
=====
Acq. Operator   :                               Seq. Line :    6
Acq. Instrument : Instrument 1                   Location  : Vial 83
Injection Date  : 8/14/2019 9:41:26 PM          Inj       :    1
                                                    Inj Volume: 1.000 µl

Acq. Method     : D:\DATA\GUAN YUQING\LJ-2-26\LJ-2-26-1 2019-08-14 19-54-25\VWD-0J(1-2)-95-5-
                  0.5ML-1UL-254NM-20MIN.M
Last changed    : 8/14/2019 7:57:29 PM
Analysis Method : D:\METHOD\LWD\DAD-AD(1-6)-95-5-1ML-3UL-ALL-30MIN-0813.M
Last changed    : 8/15/2019 6:36:03 PM
                  (modified after loading)
Additional Info : Peak(s) manually integrated
=====
```

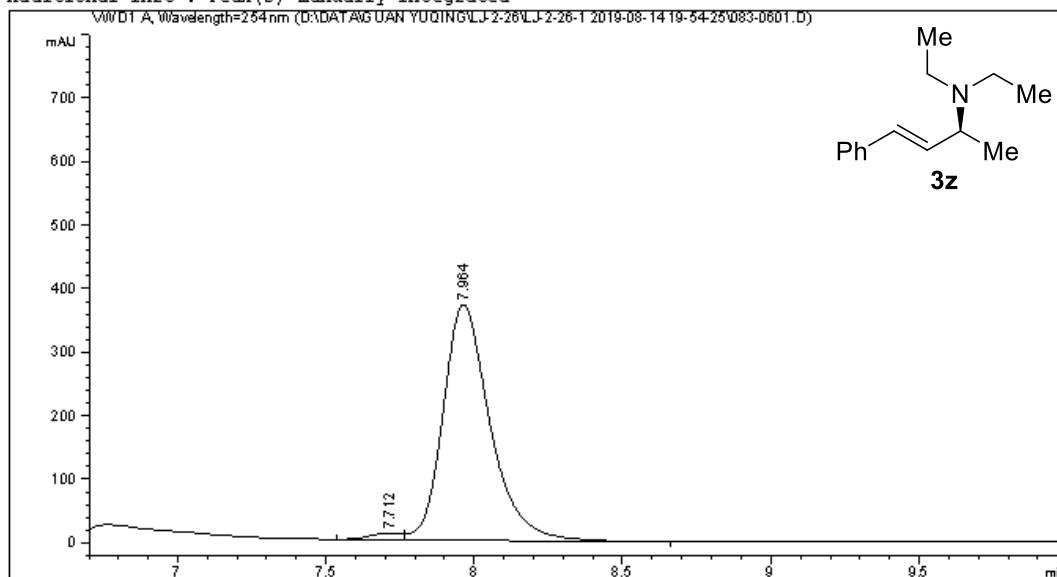

=====  
Area Percent Report  
=====

```
Sorted By      :      Signal
Multiplier     :      1.0000
Dilution       :      1.0000
Use Multiplier & Dilution Factor with ISTDs
```

Signal 1: VWD1 A, Wavelength=254 nm

| Peak # | RetTime [min] | Type | Width [min] | Area [mAU*s] | Height [mAU] | Area %  |
|--------|---------------|------|-------------|--------------|--------------|---------|
| 1      | 7.712         | BV   | 0.1156      | 78.80071     | 10.49263     | 1.8927  |
| 2      | 7.964         | VB   | 0.1663      | 4084.59766   | 371.36200    | 98.1073 |

Totals :                                   4163.39837   381.85463

**Figure S190.** HPLC spectra of **3z**, related to **Figure 3**.

Data File D:\DATA\GUAN YUQING\LJ-2-26\LJ-2-26-1 2019-08-14 19-54-25\093-0301.D  
Sample Name: LJ-2-26-1-RAC

```
=====
Acq. Operator   :                               Seq. Line :    3
Acq. Instrument : Instrument 1                   Location  : Vial 93
Injection Date  : 8/14/2019 8:34:03 PM          Inj       :    1
                                                    Inj Volume: 5.000 µl

Acq. Method     : D:\DATA\GUAN YUQING\LJ-2-26\LJ-2-26-1 2019-08-14 19-54-25\VWD-0J(1-2)-95-5-
                  1.0ML-5UL-254NM-30MIN.M
Last changed    : 8/14/2019 8:31:07 PM
                  (modified after loading)
Analysis Method : D:\METHOD\GUAN YUQING\LONGJIAO\VWD-0J(1-2)-95-5-0.5ML-1UL-254NM-20MIN.M
Last changed    : 8/14/2019 9:00:54 PM
                  (modified after loading)
Additional Info : Peak(s) manually integrated
=====
```

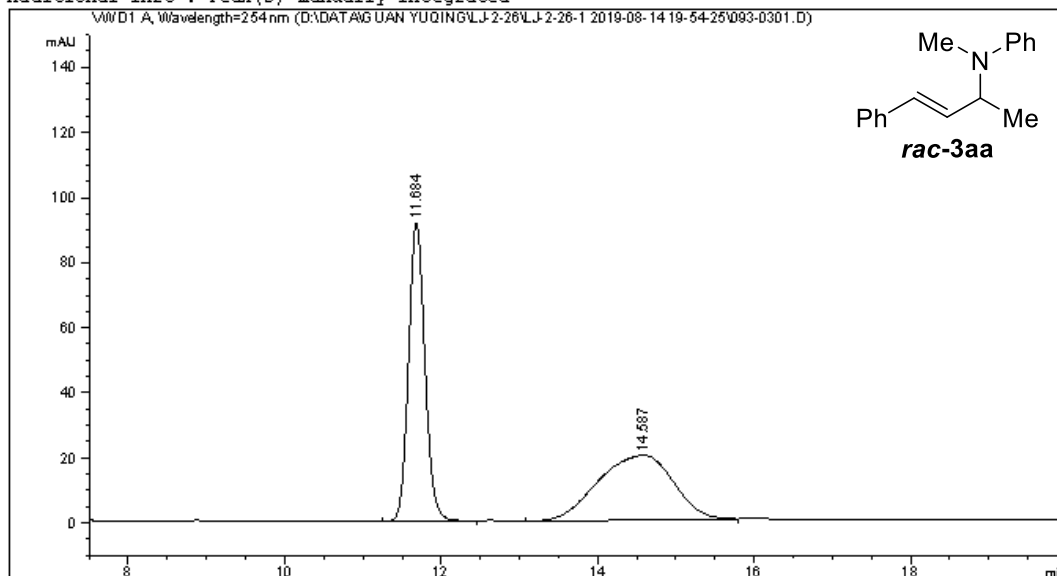

=====  
Area Percent Report  
=====

Sorted By : Signal  
Multiplier : 1.0000  
Dilution : 1.0000  
Use Multiplier & Dilution Factor with ISTDs

Signal 1: WWD1 A, Wavelength=254 nm

| Peak # | RetTime [min] | Type | Width [min] | Area [mAU*s] | Height [mAU] | Area %  |
|--------|---------------|------|-------------|--------------|--------------|---------|
| 1      | 11.684        | BB   | 0.2247      | 1341.73059   | 91.71468     | 50.3192 |
| 2      | 14.587        | BB   | 1.0837      | 1324.70544   | 19.82213     | 49.6808 |

Totals : 2666.43604 111.53681

Instrument 1 8/14/2019 9:01:15 PM

Page 1 of 2

Figure S191. HPLC spectra of *rac-3aa*, related to Figure 3.

Data File D:\DATA\GUAN YUQING\LJ-2-26\LJ-2-26-1 2019-08-14 19-54-25\092-0201.D  
Sample Name: LJ-2-26-1

```
=====
Acq. Operator   :                               Seq. Line :    2
Acq. Instrument : Instrument 1                  Location  : Vial 92
Injection Date  : 8/14/2019 8:08:13 PM        Inj       :    1
                                                Inj Volume: 5.000 µl

Acq. Method     : D:\DATA\GUAN YUQING\LJ-2-26\LJ-2-26-1 2019-08-14 19-54-25\VWD-0J(1-2)-95-5-
                  1.0ML-5UL-254NM-30MIN.M
Last changed    : 8/14/2019 8:31:07 PM
                  (modified after loading)
Analysis Method : D:\METHOD\GUAN YUQING\LONGJIAO\VWD-0J(1-2)-95-5-0.5ML-1UL-254NM-20MIN.M
Last changed    : 8/14/2019 9:03:25 PM
                  (modified after loading)
Additional Info  : Peak(s) manually integrated
=====
```

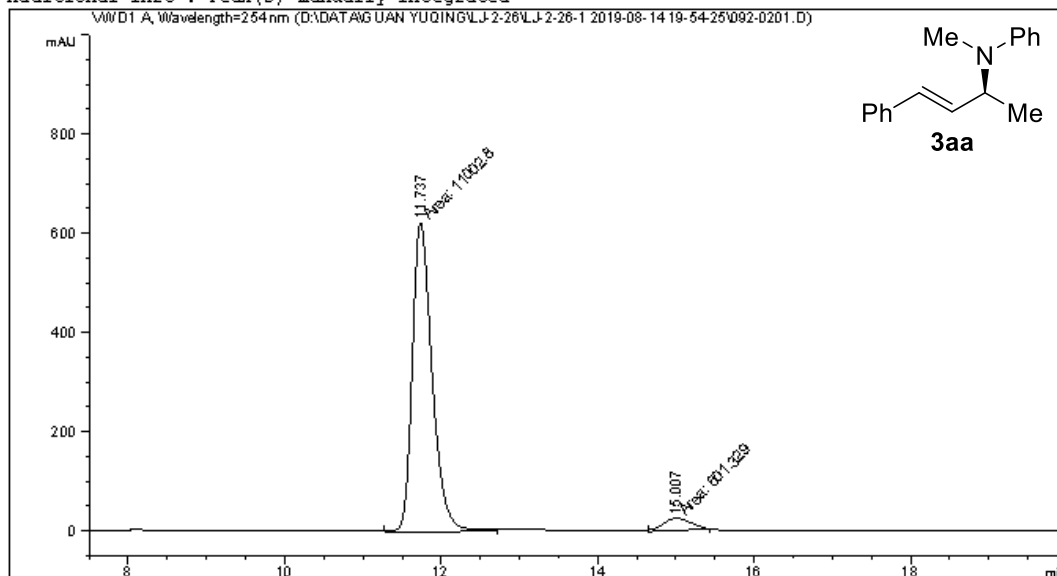

=====  
Area Percent Report  
=====

Sorted By : Signal  
Multiplier : 1.0000  
Dilution : 1.0000  
Use Multiplier & Dilution Factor with ISTDs

Signal 1: WWD1 A, Wavelength=254 nm

| Peak # | RetTime [min] | Type | Width [min] | Area [mAU*s] | Height [mAU] | Area %  |
|--------|---------------|------|-------------|--------------|--------------|---------|
| 1      | 11.737        | MM   | 0.2944      | 1.10028e4    | 622.86169    | 94.8180 |
| 2      | 15.007        | MM   | 0.4183      | 601.32904    | 23.95970     | 5.1820  |

Totals : 1.16041e4 646.82139

Instrument 1 8/14/2019 9:03:32 PM

Page 1 of 2

**Figure S192.** HPLC spectra of **3aa**, related to **Figure 3**.

Data File D:\DATA\LWD\LWD-5-60\LWD-5-60-14 2019-05-06 09-32-49\072-0501.D  
Sample Name: LJ-157-8-RAC

```
=====
Acq. Operator   :                               Seq. Line :    5
Acq. Instrument : Instrument 2                  Location  : Vial 72
Injection Date  : 5/6/2019 11:23:57 AM         Inj       :    1
                                           Inj Volume: 5.000 µl
Acq. Method     : D:\DATA\LWD\LWD-5-60\LWD-5-60-14 2019-05-06 09-32-49\DAD-0J(1-6)-99-1-0.5ML
                  -SUL-ALL-60MIN.M
Last changed    : 3/10/2019 2:55:21 PM
Analysis Method : D:\DATA\LWD\LWD-5-60\LWD-5-60-14 2019-05-06 09-32-49\DAD-0J(1-6)-99-1-0.5ML
                  -SUL-ALL-60MIN.M (Sequence Method)
Last changed    : 5/16/2019 9:39:12 PM
                  (modified after loading)
Additional Info : Peak(s) manually integrated
```

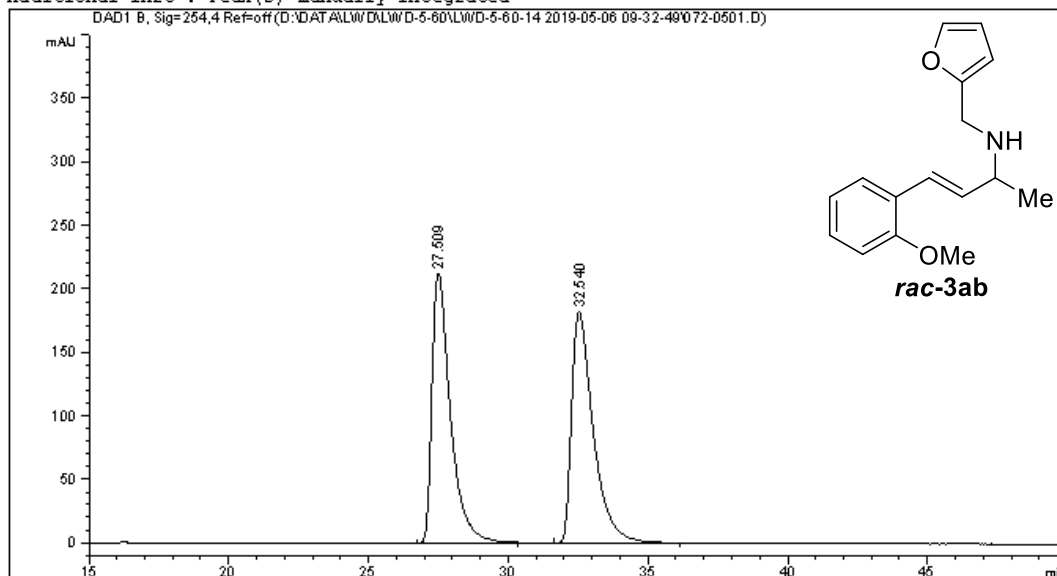

=====  
Area Percent Report  
=====

Sorted By : Signal  
Multiplier : 1.0000  
Dilution : 1.0000  
Use Multiplier & Dilution Factor with ISTDs

Signal 1: DAD1 B, Sig=254,4 Ref=off

| Peak # | RetTime [min] | Type | Width [min] | Area [mAU*s] | Height [mAU] | Area %  |
|--------|---------------|------|-------------|--------------|--------------|---------|
| 1      | 27.509        | BB   | 0.6781      | 9748.92676   | 212.96362    | 49.7788 |
| 2      | 32.540        | BB   | 0.7825      | 9835.56641   | 182.56171    | 50.2212 |

Totals : 1.95845e4 395.52533

Instrument 2 5/16/2019 9:39:15 PM

Page 1 of 2

Figure S193. HPLC spectra of *rac-3ab*, related to Figure 4.

Data File D:\DATA\LWD\LWD-5-60\LWD-5-60-14 2019-05-06 09-32-49\071-0401.D  
Sample Name: LJ-157-8

```
=====
Acq. Operator   :                               Seq. Line :    4
Acq. Instrument : Instrument 2                   Location  : Vial 71
Injection Date  : 5/6/2019 10:22:58 AM          Inj       :    1
                                                    Inj Volume: 5.000 µl
Acq. Method     : D:\DATA\LWD\LWD-5-60\LWD-5-60-14 2019-05-06 09-32-49\DAD-0J(1-6)-99-1-0.5ML
                  -SUL-ALL-60MIN.M
Last changed    : 3/10/2019 2:55:21 PM
Analysis Method : D:\DATA\LWD\LWD-5-60\LWD-5-60-14 2019-05-06 09-32-49\DAD-0J(1-6)-99-1-0.5ML
                  -SUL-ALL-60MIN.M (Sequence Method)
Last changed    : 5/16/2019 9:40:28 PM
                  (modified after loading)
Additional Info : Peak(s) manually integrated
```

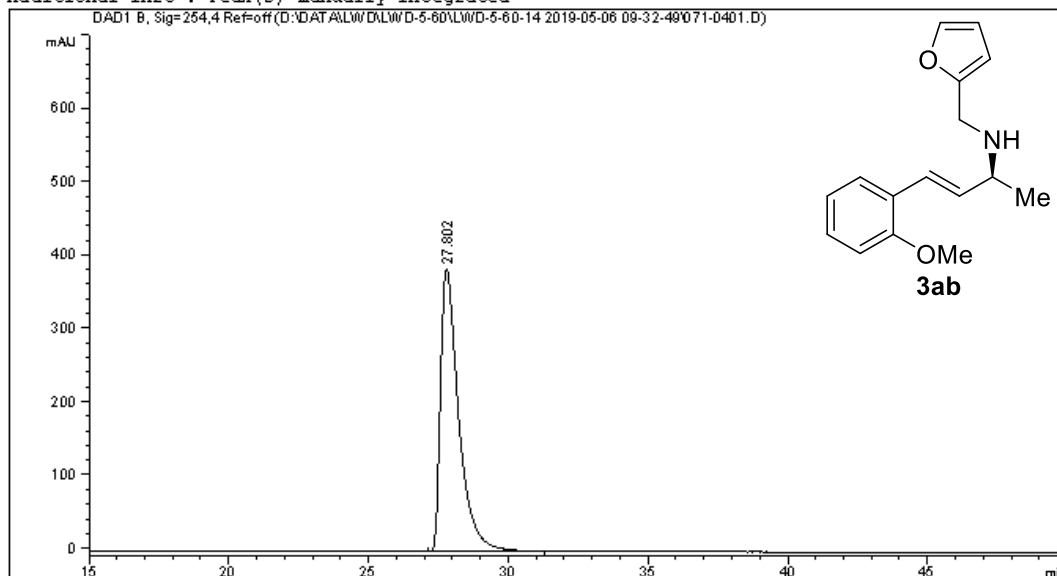

=====  
Area Percent Report  
=====

Sorted By : Signal  
Multiplier : 1.0000  
Dilution : 1.0000  
Use Multiplier & Dilution Factor with ISTDs

Signal 1: DAD1 B, Sig=254,4 Ref=off

| Peak # | RetTime [min] | Type | Width [min] | Area [mAU*s] | Height [mAU] | Area %   |
|--------|---------------|------|-------------|--------------|--------------|----------|
| 1      | 27.802        | BB   | 0.6682      | 1.73284e4    | 385.65326    | 100.0000 |

Totals : 1.73284e4 385.65326

**Figure S194.** HPLC spectra of **3ab**, related to **Figure 4**.

Data File D:\DATA\GUAN YUQING\LJ-2-55\LJ-2-55-VWD 2019-10-01 21-45-03\082-0501.D  
Sample Name: LJ-2-55-2

```
=====
Acq. Operator   :                               Seq. Line :    5
Acq. Instrument : Instrument 1                   Location  : Vial 82
Injection Date  : 10/1/2019 11:21:53 PM         Inj       :    1
                                                    Inj Volume: 5.000 µl
Acq. Method     : D:\DATA\GUAN YUQING\LJ-2-55\LJ-2-55-VWD 2019-10-01 21-45-03\VWD-AD(1-2)-99-
                  1-0.5ML-5UL-254NM-40MIN.M
Last changed    : 10/1/2019 10:33:36 PM
                  (modified after loading)
Analysis Method : D:\METHOD\LG\Y\VWD-AS(1-6)-99-1-1ML-5UL-254NM-35MIN.M
Last changed    : 10/2/2019 9:54:14 AM
                  (modified after loading)
=====
```

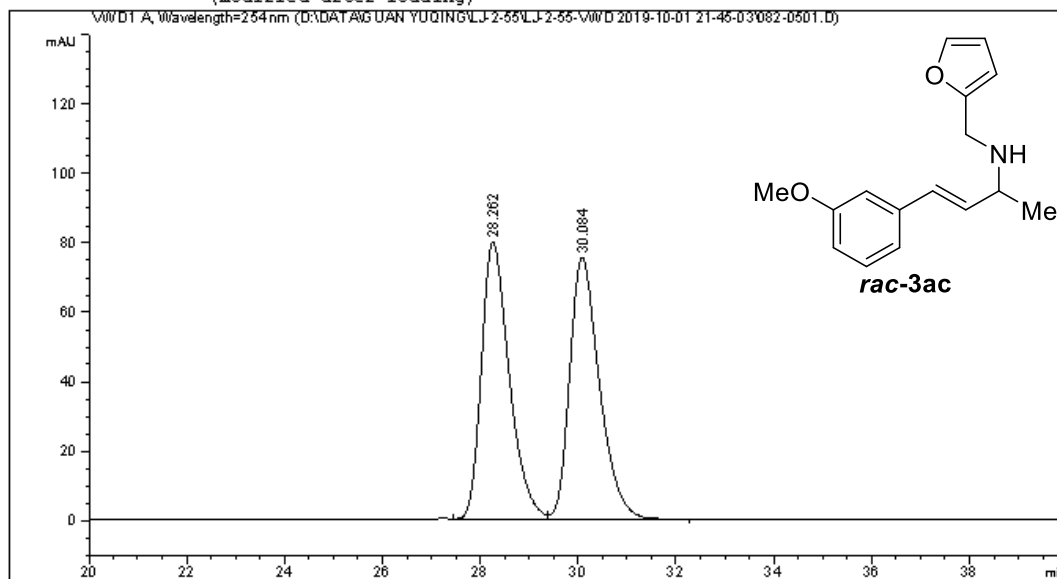

=====  
Area Percent Report  
=====

```
Sorted By      :      Signal
Multiplier     :      1.0000
Dilution       :      1.0000
Use Multiplier & Dilution Factor with ISTDs
```

Signal 1: VWD1 A, Wavelength=254 nm

| Peak # | RetTime [min] | Type | Width [min] | Area [mAU*s] | Height [mAU] | Area %  |
|--------|---------------|------|-------------|--------------|--------------|---------|
| 1      | 28.262        | BV   | 0.6025      | 3147.13306   | 79.73415     | 49.7559 |
| 2      | 30.084        | VB   | 0.6431      | 3178.01807   | 75.34550     | 50.2441 |

Totals :                                   6325.15112 155.07965

Figure S195. HPLC spectra of *rac-3ac*, related to Figure 4.

Data File D:\DATA\GUAN YUQING\LJ-2-55\LJ-2-55-VWD 2019-10-01 21-45-03\084-0601.D  
Sample Name: LJ-2-56-2

```
=====
Acq. Operator   :                               Seq. Line :    6
Acq. Instrument : Instrument 1                   Location  : Vial 84
Injection Date  : 10/2/2019 12:02:43 AM         Inj       :    1
                                                    Inj Volume: 5.000 µl
Acq. Method     : D:\DATA\GUAN YUQING\LJ-2-55\LJ-2-55-VWD 2019-10-01 21-45-03\VWD-AD(1-2)-99-
                  1-0.5ML-5UL-254NM-40MIN.M
Last changed    : 10/1/2019 10:33:36 PM
                  (modified after loading)
Analysis Method : D:\METHOD\LG\Y\VWD-AS(1-6)-99-1-1ML-5UL-254NM-35MIN.M
Last changed    : 10/2/2019 9:57:02 AM
                  (modified after loading)
Additional Info : Peak(s) manually integrated
=====
```

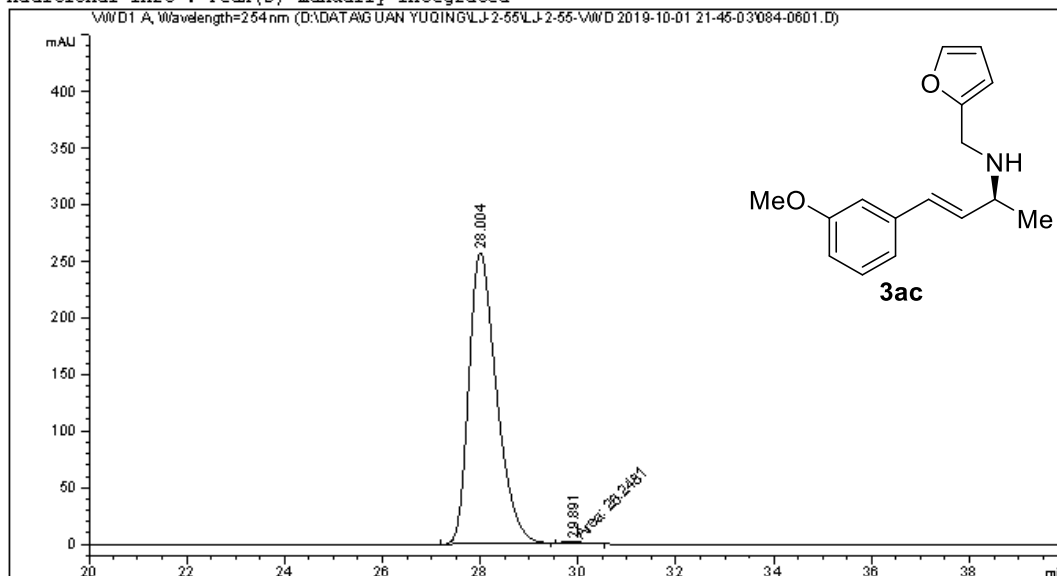

=====  
Area Percent Report  
=====

Sorted By : Signal  
Multiplier : 1.0000  
Dilution : 1.0000  
Use Multiplier & Dilution Factor with ISTDs

Signal 1: WVD1 A, Wavelength=254 nm

| Peak # | RetTime [min] | Type | Width [min] | Area [mAU*s] | Height [mAU] | Area %  |
|--------|---------------|------|-------------|--------------|--------------|---------|
| 1      | 28.004        | BB   | 0.5997      | 1.01024e4    | 256.95374    | 99.7409 |
| 2      | 29.891        | MM   | 0.4877      | 26.24809     | 8.96930e-1   | 0.2591  |

Totals : 1.01286e4 257.85067

Instrument 1 10/2/2019 9:58:48 AM

Page 1 of 2

**Figure S196.** HPLC spectra of **3ac**, related to **Figure 4**.

Data File D:\DATA\LYH\LYH-4-740\LYH-4-740-1 2019-05-03 15-55-01\085-1301.D  
Sample Name: LJ-150-1-RAC

```
=====
Acq. Operator   :                               Seq. Line :   13
Acq. Instrument : Instrument 1                   Location  : Vial 85
Injection Date  : 5/3/2019 11:26:13 PM          Inj       :    1
                                                    Inj Volume: 5.000 µl
Acq. Method     : D:\DATA\LYH\LYH-4-740\LYH-4-740-1 2019-05-03 15-55-01\VWD-AD(1-2)-99-1-0.
                  SML-5UL-254NM-60MIN.M
Last changed    : 4/16/2019 4:38:17 PM
Analysis Method : D:\METHOD\GUAN YUQING\LONGJIAO\VWD-AD(1-2)-70-30-0.SML-5UL-254NM-40MIN.M
Last changed    : 5/4/2019 10:06:22 AM
                  (modified after loading)
Additional Info : Peak(s) manually integrated
=====
```

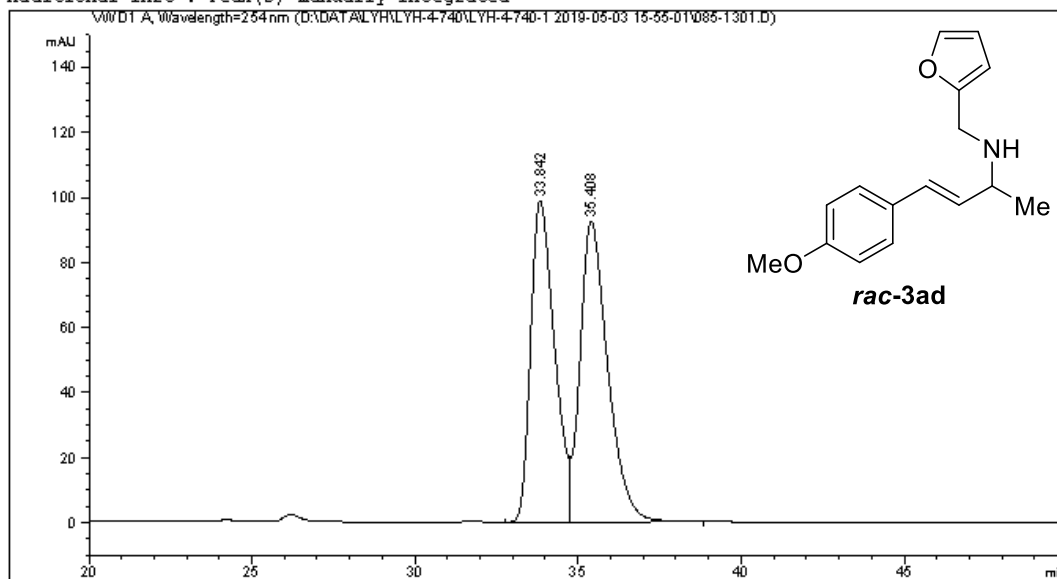

=====  
Area Percent Report  
=====

```
Sorted By      :      Signal
Multiplier     :      1.0000
Dilution       :      1.0000
Use Multiplier & Dilution Factor with ISTDs
```

Signal 1: VWD1 A, Wavelength=254 nm

| Peak # | RetTime [min] | Type | Width [min] | Area [mAU*s] | Height [mAU] | Area %  |
|--------|---------------|------|-------------|--------------|--------------|---------|
| 1      | 33.842        | BV   | 0.7749      | 5006.37842   | 98.67974     | 47.8643 |
| 2      | 35.408        | VB   | 0.8798      | 5453.14893   | 92.50365     | 52.1357 |

Totals :                                    1.04595e4    191.18340

**Figure S197.** HPLC spectra of *rac*-3ad, related to **Figure 4**.



Data File D:\DATA\LYH\LYH-4-740\LYH-4-740-1 2019-05-03 15-55-01\086-1401.D  
Sample Name: LJ-150-1

```
=====
Acq. Operator   :                               Seq. Line :   14
Acq. Instrument : Instrument 1                   Location  : Vial 86
Injection Date  : 5/4/2019 12:27:04 AM          Inj       :    1
                                                    Inj Volume: 5.000 µl
Acq. Method     : D:\DATA\LYH\LYH-4-740\LYH-4-740-1 2019-05-03 15-55-01\VWD-AD(1-2)-99-1-0.
                  SML-5UL-254NM-60MIN.M
Last changed    : 4/16/2019 4:38:17 PM
Analysis Method : D:\METHOD\GUAN YUQING\LONGJIAO\VWD-AD(1-2)-70-30-0.SML-5UL-254NM-40MIN.M
Last changed    : 5/4/2019 10:07:46 AM
                  (modified after loading)
Additional Info : Peak(s) manually integrated
=====
```

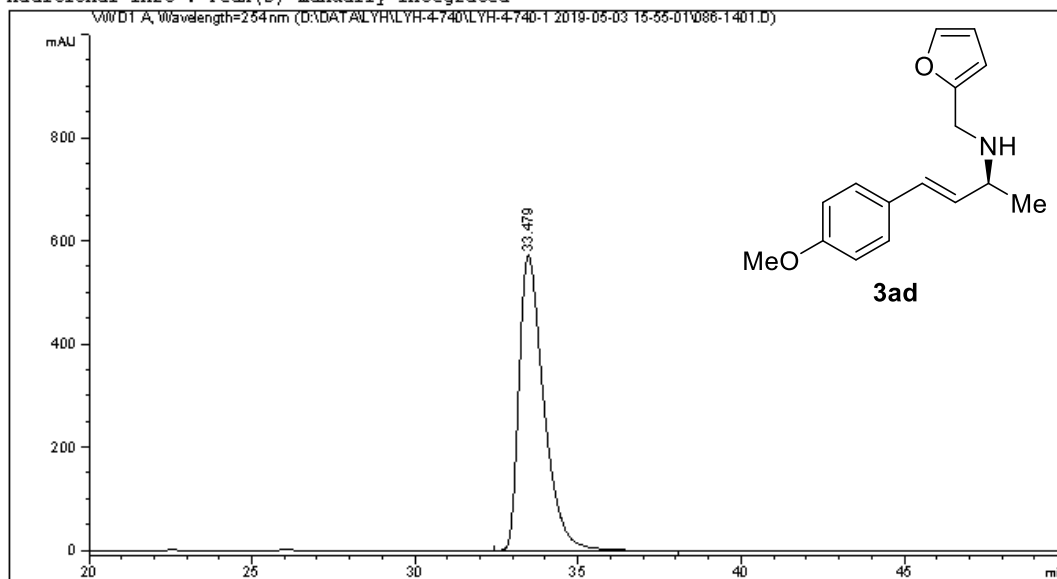

=====  
Area Percent Report  
=====

```
Sorted By      :      Signal
Multiplier     :      1.0000
Dilution       :      1.0000
Use Multiplier & Dilution Factor with ISTDs
```

Signal 1: VWD1 A, Wavelength=254 nm

| Peak # | RetTime [min] | Type | Width [min] | Area [mAU*s] | Height [mAU] | Area %   |
|--------|---------------|------|-------------|--------------|--------------|----------|
| 1      | 33.479        | BB   | 0.7929      | 3.00404e4    | 571.85364    | 100.0000 |

Totals :                    3.00404e4   571.85364

**Figure S198.** HPLC spectra of **3ad**, related to **Figure 4**.

Data File D:\DATA\LSL\LSL-4-45\LSL-4-45 2019-04-28 17-54-38\072-1201.D  
Sample Name: LJ-151-2

```
=====
Acq. Operator   :                               Seq. Line :   12
Acq. Instrument : Instrument 2                   Location  : Vial 72
Injection Date  : 4/28/2019 11:25:07 PM        Inj       :    1
                                                    Inj Volume: 5.000 µl
Acq. Method     : D:\DATA\LSL\LSL-4-45\LSL-4-45 2019-04-28 17-54-38\DAD-0J(1-6)-99-1-0.5ML-
SUL-ALL-60MIN.M
Last changed    : 3/10/2019 2:55:21 PM
Analysis Method : D:\DATA\LSL\LSL-4-45\LSL-4-45 2019-04-28 17-54-38\DAD-0J(1-6)-99-1-0.5ML-
SUL-ALL-60MIN.M (Sequence Method)
Last changed    : 5/3/2019 5:50:12 PM
                  (modified after loading)
Additional Info : Peak(s) manually integrated
```

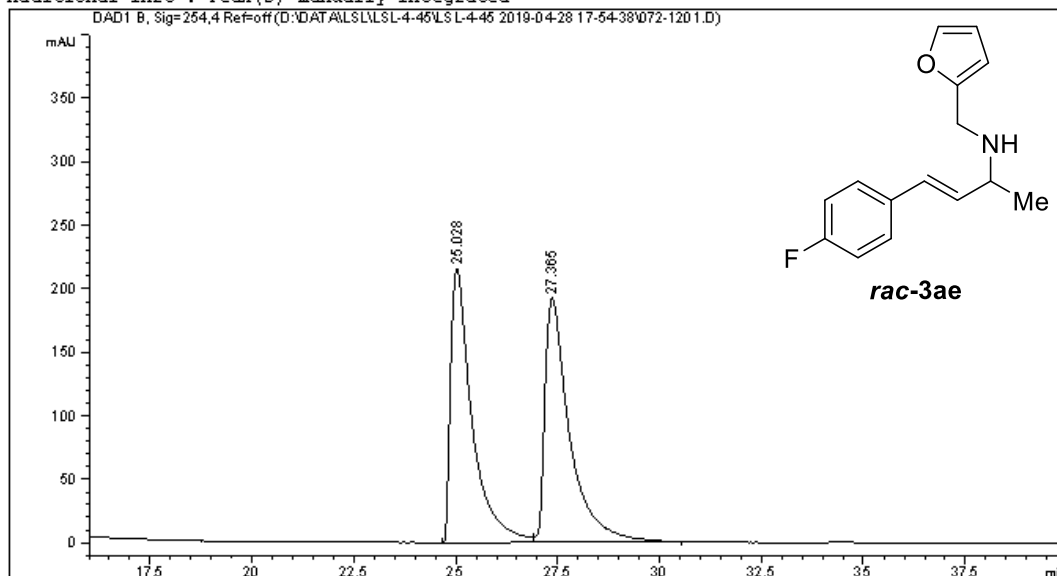

=====  
Area Percent Report  
=====

Sorted By : Signal  
Multiplier : 1.0000  
Dilution : 1.0000  
Use Multiplier & Dilution Factor with ISTDs

Signal 1: DAD1 B, Sig=254,4 Ref=off

| Peak # | RetTime [min] | Type | Width [min] | Area [mAU*s] | Height [mAU] | Area %  |
|--------|---------------|------|-------------|--------------|--------------|---------|
| 1      | 25.028        | BV   | 0.5388      | 7893.84473   | 215.79332    | 49.4747 |
| 2      | 27.365        | VB   | 0.6179      | 8061.46973   | 191.99297    | 50.5253 |

Totals : 1.59553e4 407.78629

Instrument 2 5/3/2019 5:50:23 PM

Page 1 of 2

Figure S199. HPLC spectra of *rac-3ae*, related to Figure 4.

Data File D:\DATA\LSL\LSL-4-45\LSL-4-45 2019-04-28 17-54-38\062-1301.D  
Sample Name: LJ-150-2

```
=====
Acq. Operator   :                               Seq. Line :   13
Acq. Instrument : Instrument 2                   Location  : Vial 62
Injection Date  : 4/29/2019 12:26:10 AM         Inj       :    1
                                                    Inj Volume: 5.000 µl
Acq. Method     : D:\DATA\LSL\LSL-4-45\LSL-4-45 2019-04-28 17-54-38\DAD-0J(1-6)-99-1-0.5ML-
SUL-ALL-60MIN.M
Last changed    : 3/10/2019 2:55:21 PM
Analysis Method : D:\DATA\LSL\LSL-4-45\LSL-4-45 2019-04-28 17-54-38\DAD-0J(1-6)-99-1-0.5ML-
SUL-ALL-60MIN.M (Sequence Method)
Last changed    : 5/3/2019 5:51:46 PM
                (modified after loading)
```

Additional Info : Peak(s) manually integrated

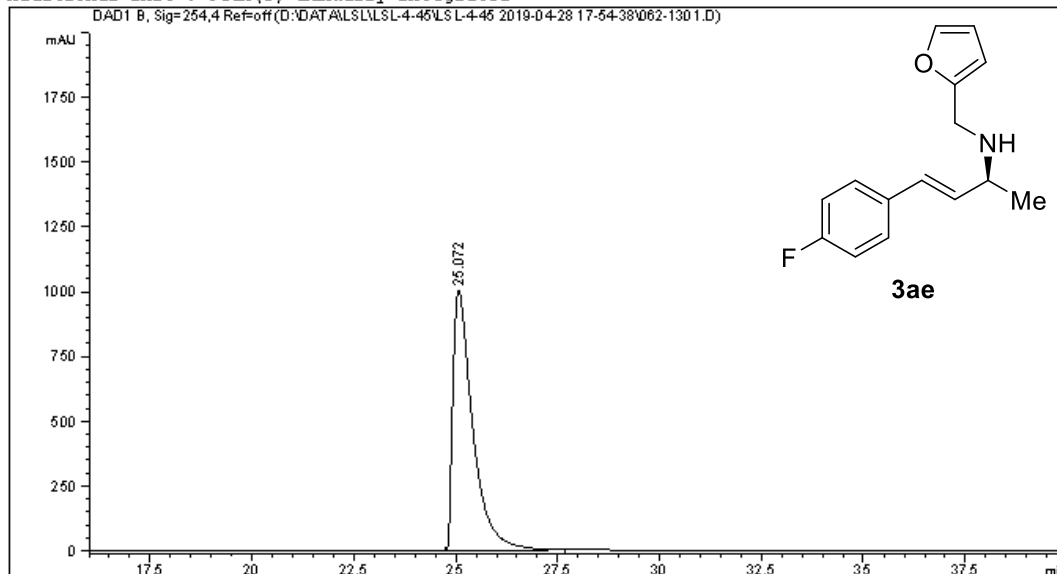

=====  
Area Percent Report  
=====

Sorted By : Signal  
Multiplier : 1.0000  
Dilution : 1.0000  
Use Multiplier & Dilution Factor with ISTDs

Signal 1: DAD1 B, Sig=254,4 Ref=off

| Peak # | RetTime [min] | Type | Width [min] | Area [mAU*s] | Height [mAU] | Area %   |
|--------|---------------|------|-------------|--------------|--------------|----------|
| 1      | 25.072        | BB   | 0.5086      | 3.41880e4    | 1005.60474   | 100.0000 |

Totals : 3.41880e4 1005.60474

Figure S200. HPLC spectra of 3ae, related to Figure 4.



Data File D:\DATA\GUAN YUQING\LJ-162\LJ-162(VWD) 2019-05-13 18-18-55\063-0501.D  
Sample Name: LJ-162-2

```
=====
Acq. Operator   :                               Seq. Line :    5
Acq. Instrument : Instrument 1                  Location  : Vial 63
Injection Date  : 5/13/2019 8:03:30 PM         Inj       :    1
                                                Inj Volume: 5.000 µl
Acq. Method     : D:\DATA\GUAN YUQING\LJ-162\LJ-162(VWD) 2019-05-13 18-18-55\VWD-AS(1-6)-99-1
                  -0.5ML-5UL-254NM-40MIN.M
Last changed    : 3/12/2019 10:38:44 AM
Analysis Method : D:\METHOD\GUAN YUQING\LONGJIAO\VWD-AD(1-2)-99-1-0.5ML-5UL-254NM-40MIN.M
Last changed    : 5/13/2019 9:40:43 PM
                  (modified after loading)
=====
```

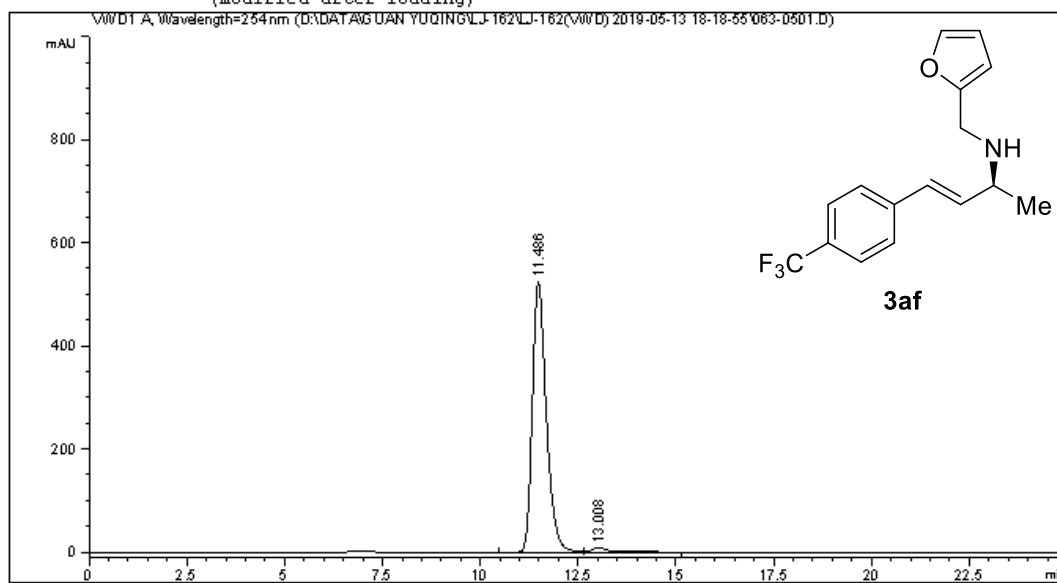

=====  
Area Percent Report  
=====

Sorted By : Signal  
Multiplier : 1.0000  
Dilution : 1.0000  
Use Multiplier & Dilution Factor with ISTDs

Signal 1: WVD1 A, Wavelength=254 nm

| Peak # | RetTime [min] | Type | Width [min] | Area [mAU*s] | Height [mAU] | Area %  |
|--------|---------------|------|-------------|--------------|--------------|---------|
| 1      | 11.486        | BV   | 0.3762      | 1.30095e4    | 524.87543    | 98.0807 |
| 2      | 13.008        | VB   | 0.4413      | 254.57536    | 8.31177      | 1.9193  |

Totals : 1.32641e4 533.18720

**Figure S202.** HPLC spectra of **3af**, related to **Figure 4**.

Data File D:\DATA\GUAN YUQING\LJ-150\LJ-150(151) 2019-04-28 17-43-31\083-0401.D  
 Sample Name: LJ-151-3

```

=====
Acq. Operator   :                               Seq. Line :    4
Acq. Instrument : Instrument 1                   Location  : Vial 83
Injection Date  : 4/28/2019 7:07:00 PM         Inj       :    1
                                                    Inj Volume: 5.000 µl
Acq. Method     : D:\DATA\GUAN YUQING\LJ-150\LJ-150(151) 2019-04-28 17-43-31\VWD-AD(1-2)-99-1
                  -0.6ML-5UL-254NM-40MIN.M
Last changed    : 4/28/2019 7:44:37 PM
                  (modified after loading)
Analysis Method : D:\DATA\GUAN YUQING\LJ-150\LJ-150(151) 2019-04-28 17-43-31\VWD-AD(1-2)-99-1
                  -0.6ML-5UL-254NM-40MIN.M (Sequence Method)
Last changed    : 5/3/2019 5:58:38 PM
                  (modified after loading)
Additional Info  : Peak(s) manually integrated
  
```

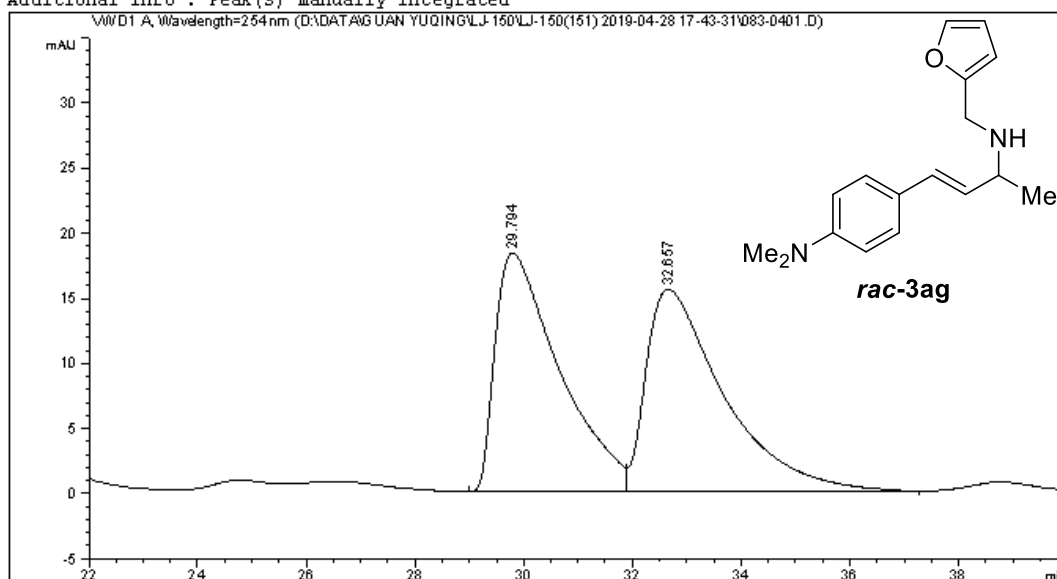

Area Percent Report

```

Sorted By      : Signal
Multiplier     : 1.0000
Dilution      : 1.0000
Use Multiplier & Dilution Factor with ISTDs
  
```

Signal 1: VWD1 A, Wavelength=254 nm

| Peak # | RetTime [min] | Type | Width [min] | Area [mAU*s] | Height [mAU] | Area %  |
|--------|---------------|------|-------------|--------------|--------------|---------|
| 1      | 29.794        | BV   | 1.1567      | 1494.45447   | 18.30020     | 49.4599 |
| 2      | 32.657        | VB   | 1.3695      | 1527.09534   | 15.49839     | 50.5401 |

Totals : 3021.54980 33.79859

Instrument 2 5/3/2019 5:58:51 PM

Page 1 of 2

Figure S203. HPLC spectra of *rac-3ag*, related to Figure 4.

Data File D:\DATA\GUAN YUQING\LJ-150\LJ-150(151) 2019-04-28 17-43-31\087-0701.D  
 Sample Name: LJ-150-3

```

=====
Acq. Operator   :                               Seq. Line :    7
Acq. Instrument : Instrument 1                  Location  : Vial 87
Injection Date  : 4/28/2019 9:09:34 PM         Inj       :    1
                                                Inj Volume: 5.000 µl
Acq. Method     : D:\DATA\GUAN YUQING\LJ-150\LJ-150(151) 2019-04-28 17-43-31\VWD-AD(1-2)-99-1
                  -0.6ML-5UL-254NM-40MIN.M
Last changed    : 4/28/2019 7:44:37 PM
                  (modified after loading)
Analysis Method : D:\DATA\GUAN YUQING\LJ-150\LJ-150(151) 2019-04-28 17-43-31\VWD-AD(1-2)-99-1
                  -0.6ML-5UL-254NM-40MIN.M (Sequence Method)
Last changed    : 5/3/2019 6:00:17 PM
                  (modified after loading)
Additional Info  : Peak(s) manually integrated
  
```

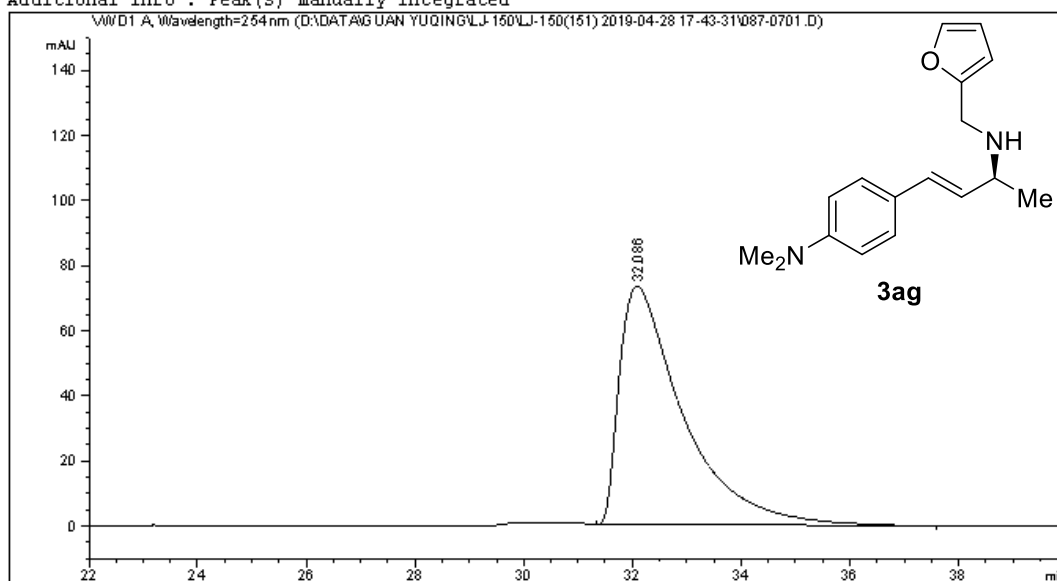

=====  
 Area Percent Report  
 =====

```

Sorted By      :      Signal
Multiplier     :      1.0000
Dilution      :      1.0000
Use Multiplier & Dilution Factor with ISTDs
  
```

Signal 1: VWD1 A, Wavelength=254 nm

| Peak # | RetTime [min] | Type | Width [min] | Area [mAU*s] | Height [mAU] | Area %   |
|--------|---------------|------|-------------|--------------|--------------|----------|
| 1      | 32.086        | BB   | 1.1885      | 5973.43457   | 73.23915     | 100.0000 |

Totals :                                    5973.43457    73.23915

**Figure S204.** HPLC spectra of **3ag**, related to **Figure 4**.

Data File D:\DATA\GUAN YUQING\LJ-2-26\LJ-2-26 2019-08-13 22-15-46\084-0501.D  
Sample Name: LJ-2-26-7-RAC

```
=====
Acq. Operator   :                               Seq. Line :    5
Acq. Instrument : Instrument 1                   Location  : Vial 84
Injection Date  : 8/14/2019 12:19:21 AM         Inj       :    1
                                                    Inj Volume: 5.000 µl
Acq. Method     : D:\DATA\GUAN YUQING\LJ-2-26\LJ-2-26 2019-08-13 22-15-46\WVD1-0J(1-2)-95-5-0.
                  SML-5UL-254NM-40MIN.M
Last changed    : 8/13/2019 10:44:25 PM
                  (modified after loading)
Analysis Method : D:\METHOD\LG\WVD-AD(1-2)-80-20-1ML-3UL-210NM-60MIN.M
Last changed    : 8/14/2019 10:07:13 AM
                  (modified after loading)
Additional Info : Peak(s) manually integrated
=====
```

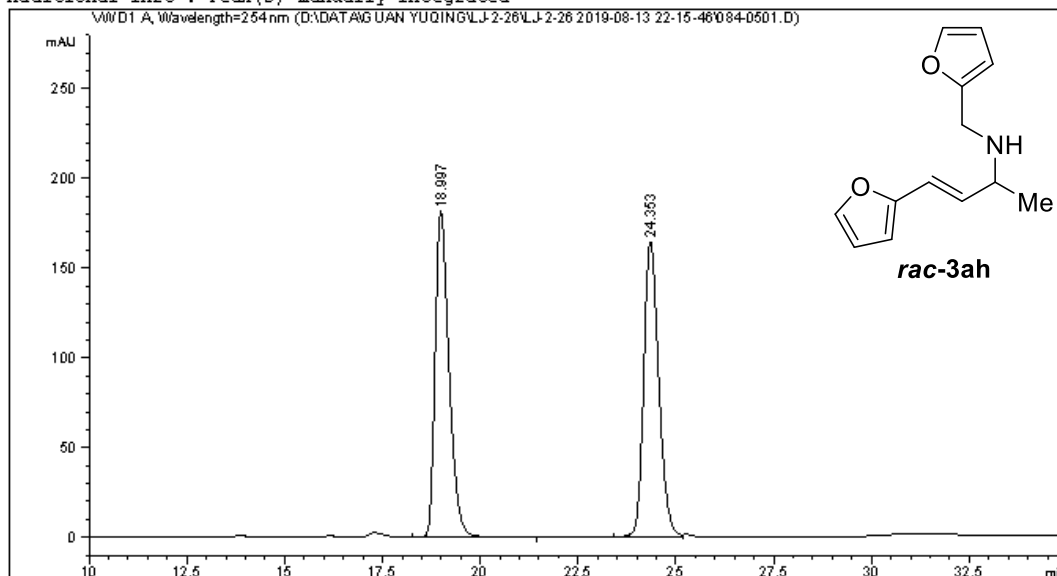

=====  
Area Percent Report  
=====

Sorted By : Signal  
Multiplier : 1.0000  
Dilution : 1.0000  
Use Multiplier & Dilution Factor with ISTDs

Signal 1: WVD1 A, Wavelength=254 nm

| Peak # | RetTime [min] | Type | Width [min] | Area [mAU*s] | Height [mAU] | Area %  |
|--------|---------------|------|-------------|--------------|--------------|---------|
| 1      | 18.997        | BB   | 0.3724      | 4454.71484   | 181.45822    | 50.2576 |
| 2      | 24.353        | BV   | 0.4114      | 4409.04004   | 164.66374    | 49.7424 |

Totals : 8863.75488 346.12196

Instrument 1 8/14/2019 10:07:21 AM

Page 1 of 2

Figure S205. HPLC spectra of *rac*-3ah, related to Figure 4.



Data File D:\DATA\GUAN YUQING\LJ-2-26\LJ-2-26 2019-08-13 22-15-46\083-0401.D  
 Sample Name: LJ-2-26-7

```

=====
Acq. Operator   :                               Seq. Line :    4
Acq. Instrument : Instrument 1                   Location  : Vial 83
Injection Date  : 8/13/2019 11:43:31 PM         Inj       :    1
                                                    Inj Volume: 5.000 µl
Acq. Method     : D:\DATA\GUAN YUQING\LJ-2-26\2019-08-13 22-15-46\WVD-0J(1-2)-95-5-0.
                  SML-5UL-254NM-40MIN.M
Last changed    : 8/13/2019 10:44:25 PM
                  (modified after loading)
Analysis Method : D:\METHOD\LG\WVD-AD(1-2)-80-20-1ML-3UL-210NM-60MIN.M
Last changed    : 8/14/2019 10:05:00 AM
                  (modified after loading)
=====
  
```

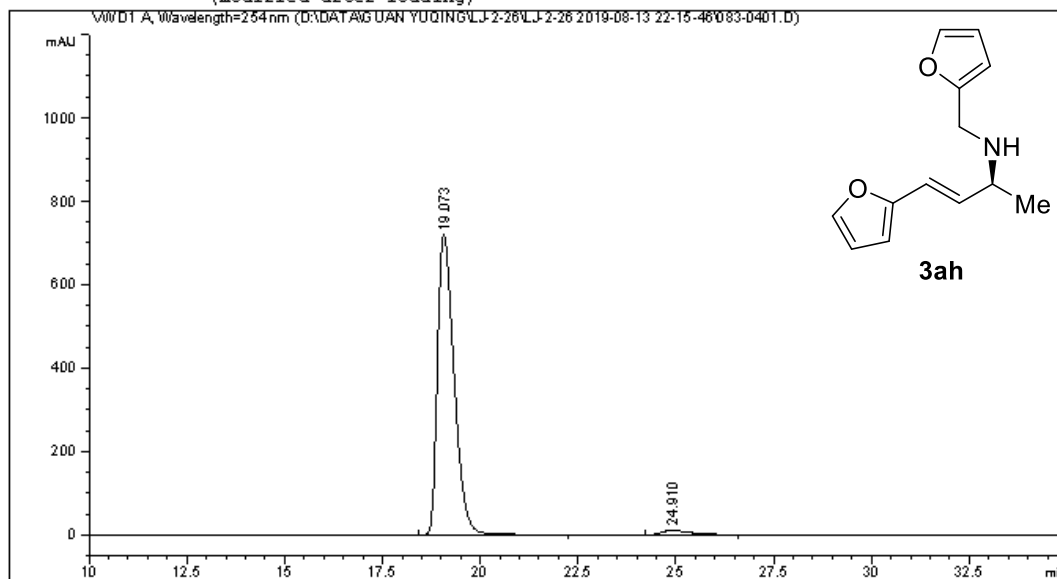

=====  
 Area Percent Report  
 =====

```

Sorted By      :      Signal
Multiplier     :      1.0000
Dilution       :      1.0000
Use Multiplier & Dilution Factor with ISTDs
  
```

Signal 1: WVD1 A, Wavelength=254 nm

| Peak # | RetTime [min] | Type | Width [min] | Area [mAU*s] | Height [mAU] | Area %  |
|--------|---------------|------|-------------|--------------|--------------|---------|
| 1      | 19.073        | BB   | 0.4558      | 2.10885e4    | 719.88995    | 97.8563 |
| 2      | 24.910        | BB   | 0.6432      | 461.96768    | 10.62533     | 2.1437  |

Totals :                                    2.15505e4    730.51528

**Figure S206.** HPLC spectra of **3ah**, related to **Figure 4**.

Data File D:\DATA\LSL\LSL-4-86-1\LSL-4-86-2 2019-06-29 09-08-43\093-3101.D  
 Sample Name: LJ-2-1-2

```

=====
Acq. Operator   :                               Seq. Line :   31
Acq. Instrument : Instrument 1                   Location  : Vial 93
Injection Date  : 6/29/2019 9:16:35 PM          Inj       :    1
                                                    Inj Volume: 5.000 µl

Acq. Method     : D:\DATA\LSL\LSL-4-86-1\LSL-4-86-2 2019-06-29 09-08-43\VWD-AD(1-2)-95-5-0.
                  SML-5UL-220NM-40MIN.M
Last changed    : 6/29/2019 9:54:18 PM
                  (modified after loading)
Analysis Method : D:\METHOD\GUAN YUQING\LONGJIAO\VWD-AS(1-6)-80-20-1.OML-5UL-220NM-45MIN.M
Last changed    : 6/29/2019 10:12:37 PM
                  (modified after loading)
Additional Info : Peak(s) manually integrated
  
```

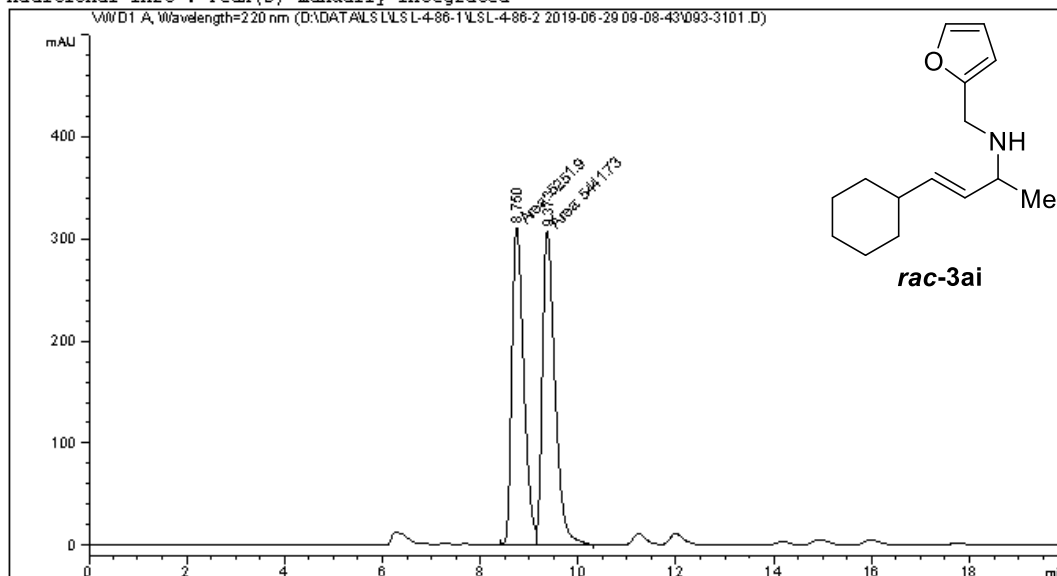

=====  
 Area Percent Report  
 =====

```

Sorted By      :      Signal
Multiplier     :      1.0000
Dilution       :      1.0000
Use Multiplier & Dilution Factor with ISTDs
  
```

Signal 1: WVD1 A, Wavelength=220 nm

| Peak # | RetTime [min] | Type | Width [min] | Area [mAU*s] | Height [mAU] | Area %  |
|--------|---------------|------|-------------|--------------|--------------|---------|
| 1      | 8.750         | MF   | 0.2815      | 5251.89600   | 310.98474    | 49.1124 |
| 2      | 9.373         | FM   | 0.2955      | 5441.73340   | 306.92697    | 50.8876 |

Totals :                    1.06936e4    617.91171

**Figure S207.** HPLC spectra of *rac-3ai*, related to **Figure 4**.

Data File D:\DATA\LSL\LSL-4-86-1\LSL-4-86-2 2019-06-29 09-08-43\094-3501.D  
Sample Name: LJ-2-2-2

```
=====
Acq. Operator   :                               Seq. Line :   35
Acq. Instrument : Instrument 1                  Location  : Vial 94
Injection Date  : 6/29/2019 10:30:10 PM        Inj       :    1
                                                Inj Volume: 5.000 µl

Acq. Method     : D:\DATA\LSL\LSL-4-86-1\LSL-4-86-2 2019-06-29 09-08-43\VWD-AD(1-2)-95-5-0.
                  SML-5UL-220NM-40MIN.M
Last changed    : 6/29/2019 10:39:27 PM
                  (modified after loading)
Analysis Method : D:\METHOD\GUAN YUQING\LONGJIAO\VWD-AS(1-6)-80-20-1.OML-5UL-220NM-45MIN.M
Last changed    : 6/29/2019 10:51:26 PM
                  (modified after loading)
Additional Info : Peak(s) manually integrated
=====
```

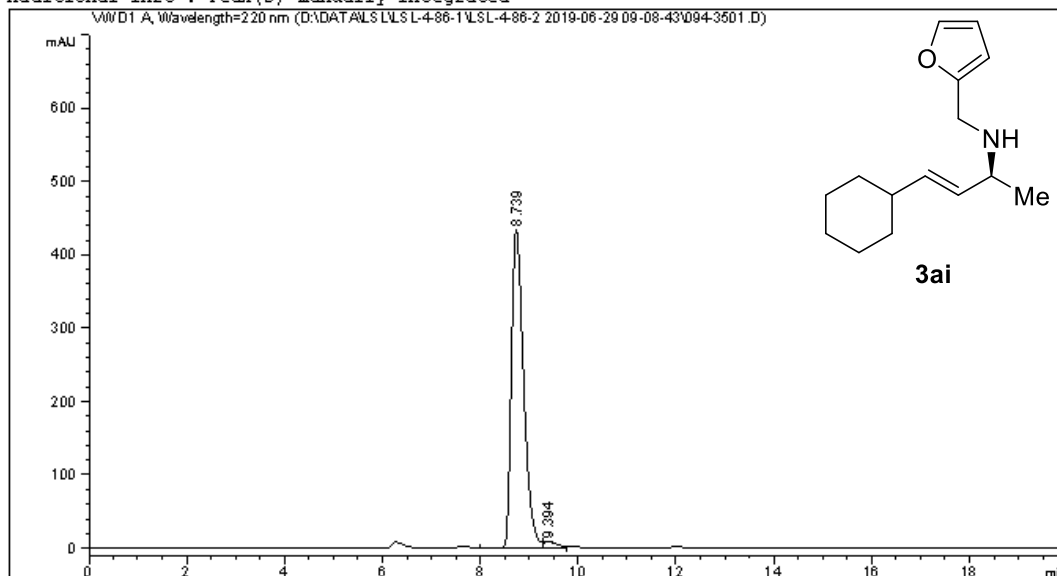

=====  
Area Percent Report  
=====

Sorted By : Signal  
Multiplier : 1.0000  
Dilution : 1.0000  
Use Multiplier & Dilution Factor with ISTDs

Signal 1: WVD1 A, Wavelength=220 nm

| Peak # | RetTime [min] | Type | Width [min] | Area [mAU*s] | Height [mAU] | Area %  |
|--------|---------------|------|-------------|--------------|--------------|---------|
| 1      | 8.739         | BV   | 0.2663      | 7521.54541   | 433.75995    | 97.8275 |
| 2      | 9.394         | VV   | 0.2780      | 167.03423    | 8.62418      | 2.1725  |

Totals : 7688.57964 442.38413

Instrument 1 6/29/2019 10:51:50 PM

Page 1 of 2

**Figure S208.** HPLC spectra of **3ai**, related to **Figure 4**.

Data File D:\DATA\GUAN YUQING\LJ-2-58\LJ-2-58 2019-10-04 14-59-34\084-0601.D  
Sample Name: LJ-2-58-2-RAC

```
=====
Acq. Operator   :                               Seq. Line :    6
Acq. Instrument : Instrument 1                   Location  : Vial 84
Injection Date  : 10/4/2019 4:49:52 PM          Inj       :    1
                                                    Inj Volume: 5.000 µl
Acq. Method     : D:\DATA\GUAN YUQING\LJ-2-58\LJ-2-58 2019-10-04 14-59-34\WVD-0J(1-6)-95-5-0.
                  SML-5UL-220NM-25MIN.M
Last changed    : 10/4/2019 2:55:51 PM
Analysis Method : D:\METHOD\GUAN YUQING\LONGJIAO\WVD-OD(1-2)-95-5-0.SML-5UL-254NM-10MIN.M
Last changed    : 10/4/2019 7:02:46 PM
                  (modified after loading)
Additional Info : Peak(s) manually integrated
=====
```

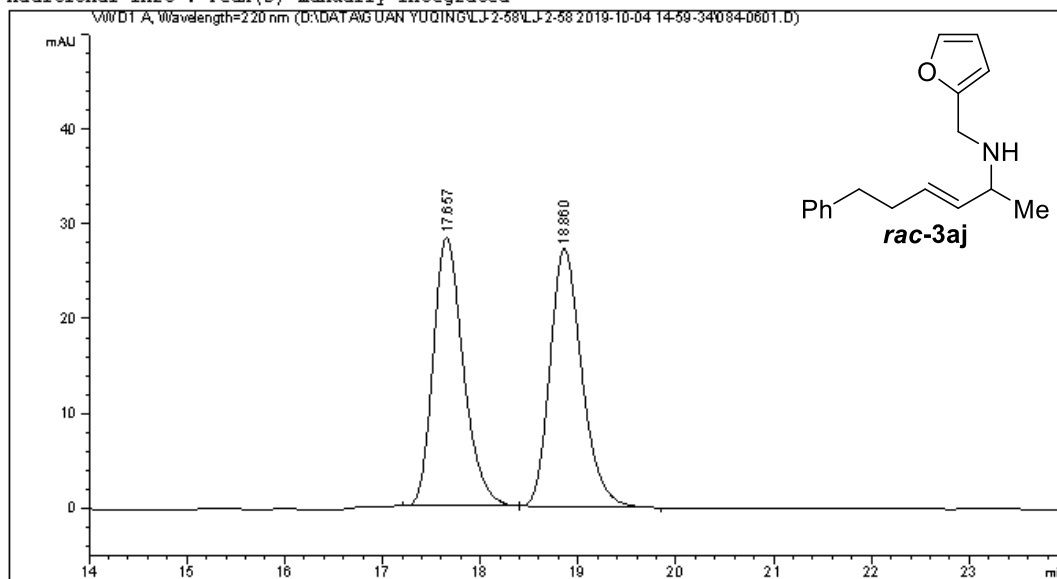

=====  
Area Percent Report  
=====

```
Sorted By      :      Signal
Multiplier     :      1.0000
Dilution       :      1.0000
Use Multiplier & Dilution Factor with ISTDs
```

Signal 1: WVD1 A, Wavelength=220 nm

| Peak # | RetTime [min] | Type | Width [min] | Area [mAU*s] | Height [mAU] | Area %  |
|--------|---------------|------|-------------|--------------|--------------|---------|
| 1      | 17.657        | BB   | 0.3280      | 608.07892    | 28.37230     | 49.7003 |
| 2      | 18.860        | BB   | 0.3465      | 615.41345    | 27.25274     | 50.2997 |

Totals :                                   1223.49237   55.62503

Figure S209. HPLC spectra of *rac-3aj*, related to Figure 4.

Data File D:\DATA\GUAN YUQING\LJ-2-58\LJ-2-58 2019-10-04 14-59-34\083-0501.D  
Sample Name: LJ-2-58-2

```
=====
Acq. Operator   :                               Seq. Line :    5
Acq. Instrument : Instrument 1                   Location  : Vial 83
Injection Date  : 10/4/2019 4:24:02 PM          Inj       :    1
                                                    Inj Volume: 5.000 µl
Acq. Method     : D:\DATA\GUAN YUQING\LJ-2-58\LJ-2-58 2019-10-04 14-59-34\WVD-0J(1-6)-95-5-0.
                  SML-5UL-220NM-25MIN.M
Last changed    : 10/4/2019 2:55:51 PM
Analysis Method : D:\METHOD\GUAN YUQING\LONGJIAO\WVD-OD(1-2)-95-5-0.SML-5UL-254NM-10MIN.M
Last changed    : 10/4/2019 7:04:34 PM
                  (modified after loading)
Additional Info  : Peak(s) manually integrated
=====
```

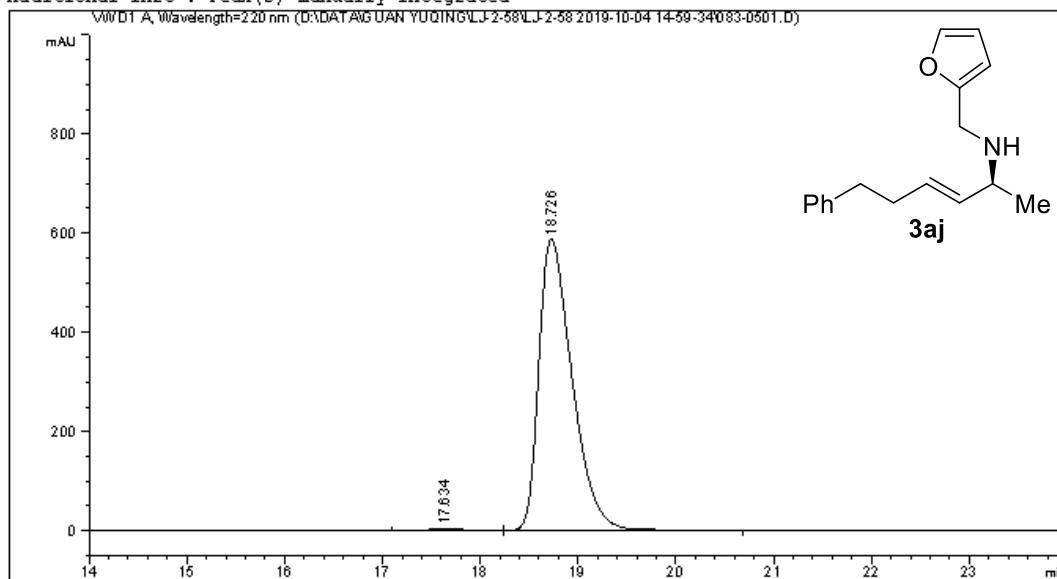

=====  
Area Percent Report  
=====

Sorted By : Signal  
Multiplier : 1.0000  
Dilution : 1.0000  
Use Multiplier & Dilution Factor with ISTDs

Signal 1: WVD1 A, Wavelength=220 nm

| Peak # | RetTime [min] | Type | Width [min] | Area [mAU*s] | Height [mAU] | Area %  |
|--------|---------------|------|-------------|--------------|--------------|---------|
| 1      | 17.634        | BB   | 0.3316      | 67.67126     | 3.10049      | 0.4848  |
| 2      | 18.726        | BB   | 0.3628      | 1.38897e4    | 587.63940    | 99.5152 |

Totals : 1.39574e4 590.73990

Figure S210. HPLC spectra of 3aj, related to Figure 4.

Data File D:\DATA\LWD\LWD-5-60\LWD-5-60-14 2019-05-06 09-32-49\074-1201.D  
Sample Name: LJ-157-7-RAC

```
=====
Acq. Operator   :                               Seq. Line :   12
Acq. Instrument : Instrument 2                   Location  : Vial 74
Injection Date  : 5/6/2019 3:51:09 PM           Inj       :    1
                                                    Inj Volume: 5.000 µl
Acq. Method     : D:\DATA\LWD\LWD-5-60\LWD-5-60-14 2019-05-06 09-32-49\DAD-OD(1-2)-99-1-0.5ML
                  -SUL-ALL-40MIN.M
Last changed    : 3/8/2019 11:06:52 AM
Analysis Method : D:\DATA\LWD\LWD-5-60\LWD-5-60-14 2019-05-06 09-32-49\DAD-OD(1-2)-99-1-0.5ML
                  -SUL-ALL-40MIN.M (Sequence Method)
Last changed    : 5/16/2019 9:35:29 PM
                  (modified after loading)
Additional Info : Peak(s) manually integrated
```

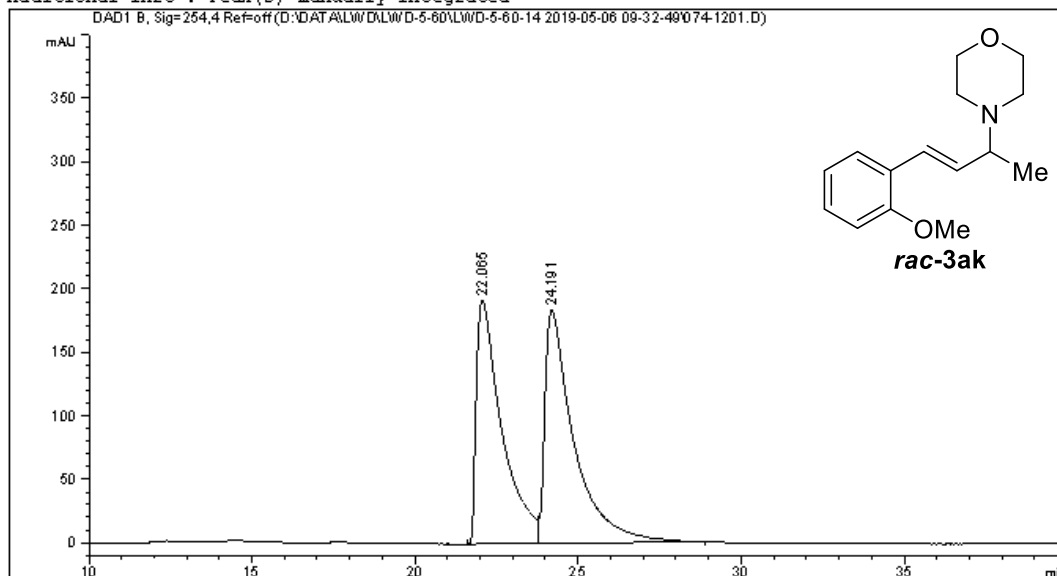

=====  
Area Percent Report  
=====

Sorted By : Signal  
Multiplier : 1.0000  
Dilution : 1.0000  
Use Multiplier & Dilution Factor with ISTDs

Signal 1: DAD1 B, Sig=254,4 Ref=off

| Peak # | RetTime [min] | Type | Width [min] | Area [mAU*s] | Height [mAU] | Area %  |
|--------|---------------|------|-------------|--------------|--------------|---------|
| 1      | 22.065        | BV   | 0.7619      | 1.03696e4    | 192.05229    | 47.7532 |
| 2      | 24.191        | VB   | 0.8610      | 1.13454e4    | 183.57259    | 52.2468 |

Totals : 2.17150e4 375.62488

Instrument 2 5/16/2019 9:37:33 PM

Page 1 of 2

Figure S211. HPLC spectra of *rac-3ak*, related to Figure 4.

Data File D:\DATA\LWD\LWD-5-60\LWD-5-60-14 2019-05-06 09-32-49\073-1101.D  
Sample Name: LJ-157-7

```
=====
Acq. Operator   :                               Seq. Line :   11
Acq. Instrument : Instrument 2                   Location  : Vial 73
Injection Date  : 5/6/2019 3:10:06 PM           Inj       :    1
                                                    Inj Volume: 5.000 µl
Acq. Method     : D:\DATA\LWD\LWD-5-60\LWD-5-60-14 2019-05-06 09-32-49\DAD-OD(1-2)-99-1-0.5ML
                  -SUL-ALL-40MIN.M
Last changed    : 3/8/2019 11:06:52 AM
Analysis Method : D:\DATA\LWD\LWD-5-60\LWD-5-60-14 2019-05-06 09-32-49\DAD-OD(1-2)-99-1-0.5ML
                  -SUL-ALL-40MIN.M (Sequence Method)
Last changed    : 5/16/2019 9:35:29 PM
                  (modified after loading)
Additional Info : Peak(s) manually integrated
```

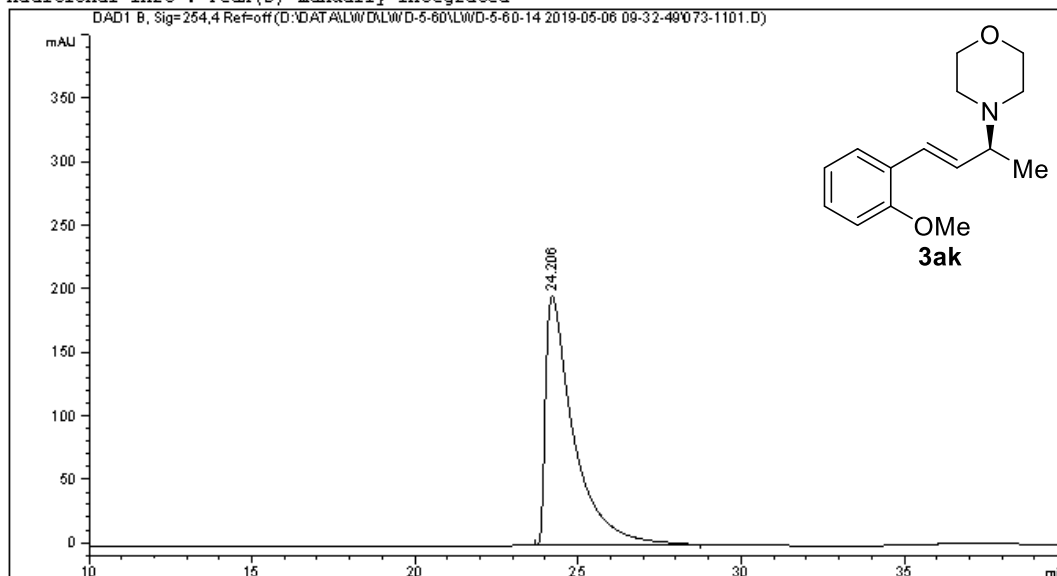

=====  
Area Percent Report  
=====

Sorted By : Signal  
Multiplier : 1.0000  
Dilution : 1.0000  
Use Multiplier & Dilution Factor with ISTDs

Signal 1: DAD1 B, Sig=254,4 Ref=off

| Peak # | RetTime [min] | Type | Width [min] | Area [mAU*s] | Height [mAU] | Area %   |
|--------|---------------|------|-------------|--------------|--------------|----------|
| 1      | 24.206        | BB   | 0.8172      | 1.16287e4    | 196.28775    | 100.0000 |

Totals : 1.16287e4 196.28775

Figure S212. HPLC spectra of 3ak, related to Figure 4.

Data File D:\DATA\GUAN YUQING\LJ-2-55\LJ-2-55-VWD 2019-10-01 21-45-03\081-0301.D  
 Sample Name: LJ-2-55-1

```

=====
Acq. Operator   :                               Seq. Line :    3
Acq. Instrument : Instrument 1                  Location  : Vial 81
Injection Date  : 10/1/2019 10:00:10 PM       Inj       :    1
                                           Inj Volume: 5.000 µl

Acq. Method     : D:\DATA\GUAN YUQING\LJ-2-55\LJ-2-55-VWD 2019-10-01 21-45-03\VWD-AD(1-2)-99-
                  1-0.5ML-5UL-254NM-40MIN.M
Last changed    : 10/1/2019 10:33:36 PM
                  (modified after loading)

Analysis Method : D:\METHOD\LG\Y\VWD-AS(1-6)-99-1-1ML-5UL-254NM-35MIN.M
Last changed    : 10/2/2019 9:50:35 AM
                  (modified after loading)
=====
  
```

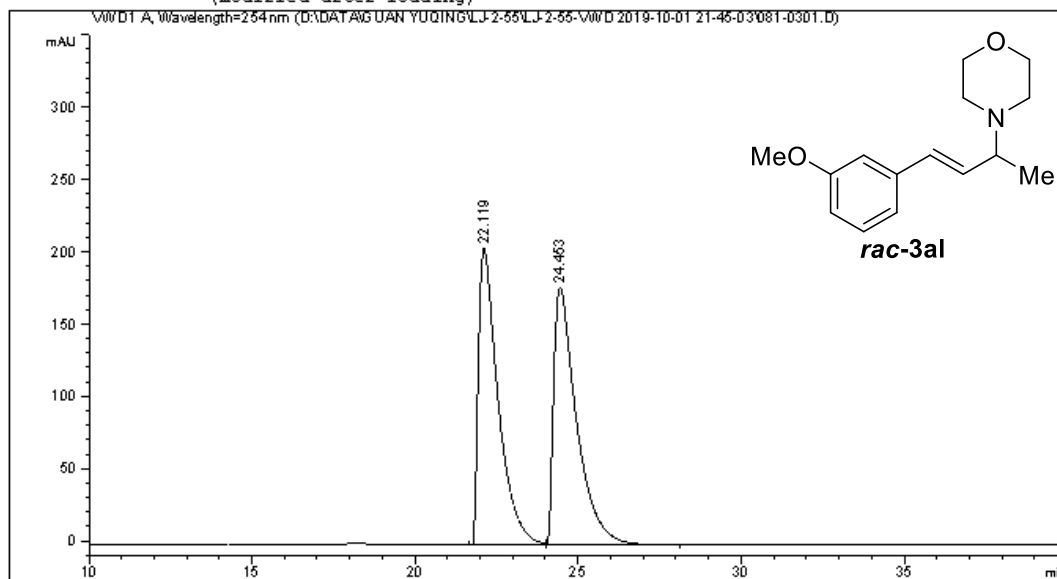

=====  
 Area Percent Report  
 =====

```

Sorted By      :      Signal
Multiplier     :      1.0000
Dilution       :      1.0000
Use Multiplier & Dilution Factor with ISTDs
  
```

Signal 1: VWD1 A, Wavelength=254 nm

| Peak # | RetTime [min] | Type | Width [min] | Area [mAU*s] | Height [mAU] | Area %  |
|--------|---------------|------|-------------|--------------|--------------|---------|
| 1      | 22.119        | BV   | 0.6259      | 8631.62793   | 205.12622    | 49.9469 |
| 2      | 24.453        | VB   | 0.7208      | 8649.99707   | 178.04210    | 50.0531 |

Totals :                                    1.72816e4    383.16832

**Figure S213.** HPLC spectra of *rac-3al*, related to **Figure 4**.



Data File D:\DATA\GUAN YUQING\LJ-2-55\LJ-2-55-VWD 2019-10-01 21-45-03\083-0401.D  
 Sample Name: LJ-2-56-1

```

=====
Acq. Operator   :                               Seq. Line :    4
Acq. Instrument : Instrument 1                   Location  : Vial 83
Injection Date  : 10/1/2019 10:41:00 PM         Inj       :    1
                                           Inj Volume: 5.000 µl

Acq. Method     : D:\DATA\GUAN YUQING\LJ-2-55\LJ-2-55-VWD 2019-10-01 21-45-03\VWD-AD(1-2)-99-
                  1-0.5ML-5UL-254NM-40MIN.M
Last changed    : 10/1/2019 10:33:36 PM
                  (modified after loading)
Analysis Method : D:\METHOD\LG\Y\VWD-AS(1-6)-99-1-1ML-5UL-254NM-35MIN.M
Last changed    : 10/2/2019 9:52:43 AM
                  (modified after loading)
=====
  
```

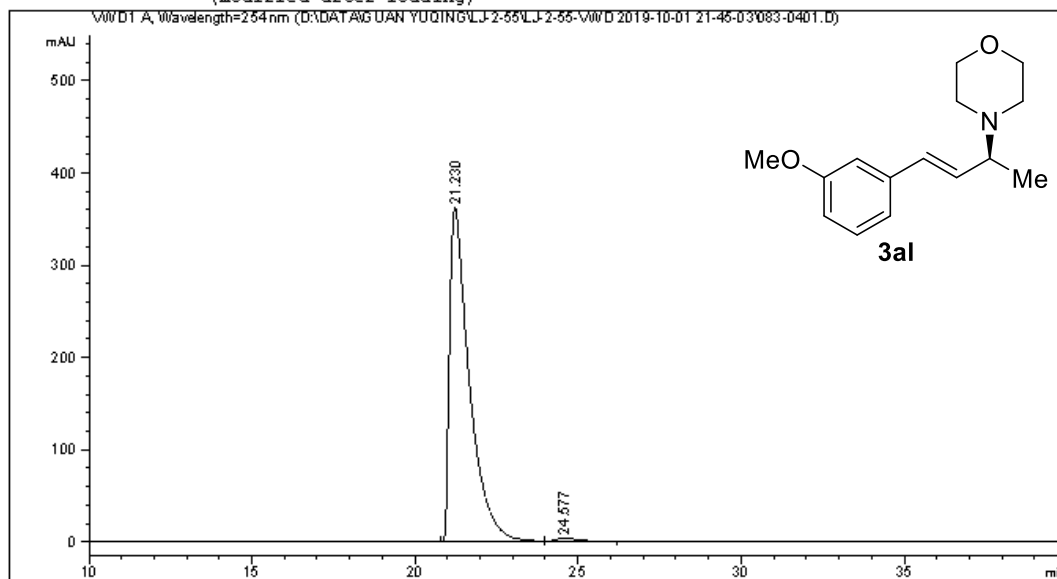

Area Percent Report

```

=====
Sorted By      :      Signal
Multiplier     :      1.0000
Dilution       :      1.0000
Use Multiplier & Dilution Factor with ISTDs
=====
  
```

Signal 1: VWD1 A, Wavelength=254 nm

| Peak # | RetTime [min] | Type | Width [min] | Area [mAU*s] | Height [mAU] | Area %  |
|--------|---------------|------|-------------|--------------|--------------|---------|
| 1      | 21.230        | BB   | 0.6171      | 1.52116e4    | 361.37299    | 99.2011 |
| 2      | 24.577        | BB   | 0.6320      | 122.49827    | 2.78591      | 0.7989  |

Totals :                                    1.53341e4    364.15890

Figure S214. HPLC spectra of 3al, related to Figure 4.

Data File D:\DATA\ZX\XZC-190410-1 2019-04-12 19-18-12\064-1101.D  
Sample Name: LJ-133-1

```
=====
Acq. Operator   :                               Seq. Line :   11
Acq. Instrument : Instrument 2                   Location  : Vial 64
Injection Date  : 4/13/2019 1:19:47 AM         Inj       :    1
                                                Inj Volume: 5.000 µl
Acq. Method     : D:\DATA\ZX\XZC-190410-1 2019-04-12 19-18-12\DAD-0J(1-6)-95-5-1ML-5UL-ALL-60MIN.M
Last changed    : 7/6/2018 10:36:38 PM
Analysis Method : D:\METHOD\LG\DAD-0J(1-6)-80-20-1ML-5UL-ALL-60MIN.M
Last changed    : 4/14/2019 9:57:24 PM
                (modified after loading)
Additional Info : Peak(s) manually integrated
=====
```

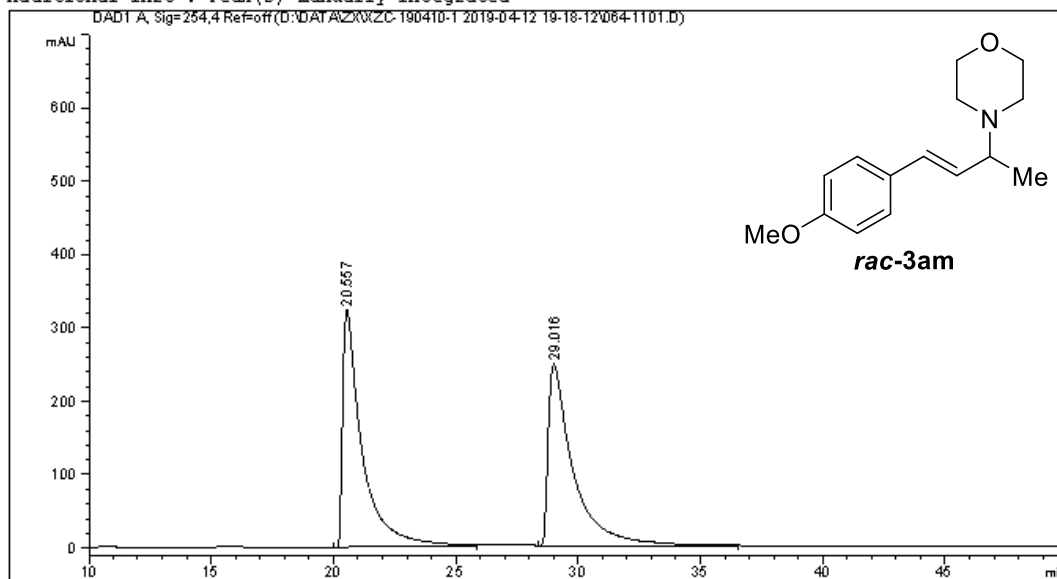

=====  
Area Percent Report  
=====

```
Sorted By      :      Signal
Multiplier     :      1.0000
Dilution       :      1.0000
Use Multiplier & Dilution Factor with ISTDs
```

Signal 1: DAD1 A, Sig=254,4 Ref=off

| Peak # | RetTime [min] | Type | Width [min] | Area [mAU*s] | Height [mAU] | Area %  |
|--------|---------------|------|-------------|--------------|--------------|---------|
| 1      | 20.557        | BB   | 0.7647      | 1.77001e4    | 323.29202    | 50.1433 |
| 2      | 29.016        | BB   | 0.9701      | 1.75989e4    | 247.34940    | 49.8567 |

Totals :                                    3.52990e4    570.64142

Figure S215. HPLC spectra of *rac*-3am, related to Figure 4.

Data File D:\DATA\ZX\XZC-190410-1 2019-04-12 19-18-12\063-1001.D  
Sample Name: LJ-132-1

```
=====
Acq. Operator   :                               Seq. Line :   10
Acq. Instrument : Instrument 2                  Location  : Vial 63
Injection Date  : 4/13/2019 12:18:46 AM        Inj       :    1
                                           Inj Volume: 5.000 µl
Acq. Method     : D:\DATA\ZX\XZC-190410-1 2019-04-12 19-18-12\DAD-0J(1-6)-95-5-1ML-5UL-ALL-60MIN.M
Last changed    : 7/6/2018 10:36:38 PM
Analysis Method : D:\METHOD\LG\DAD-0J(1-6)-80-20-1ML-5UL-ALL-60MIN.M
Last changed    : 4/14/2019 9:58:32 PM
                (modified after loading)
Additional Info : Peak(s) manually integrated
=====
```

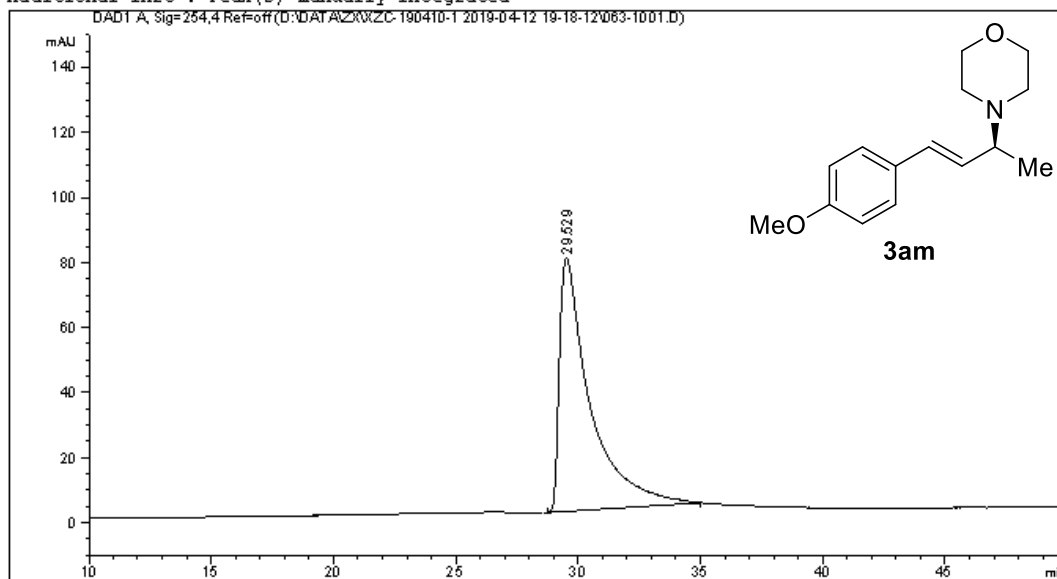

=====  
Area Percent Report  
=====

```
Sorted By      :      Signal
Multiplier     :      1.0000
Dilution       :      1.0000
Use Multiplier & Dilution Factor with ISTDs
```

Signal 1: DAD1 A, Sig=254,4 Ref=off

| Peak # | RetTime [min] | Type | Width [min] | Area [mAU*s] | Height [mAU] | Area %   |
|--------|---------------|------|-------------|--------------|--------------|----------|
| 1      | 29.529        | BB   | 1.1823      | 6790.98779   | 77.80267     | 100.0000 |

Totals :                    6790.98779    77.80267

Figure S216. HPLC spectra of 3am, related to Figure 4.

Data File D:\DATA\ZX\ZX-3-81\LSL-4-31-3 2019-04-13 13-34-06\062-0701.D  
 Sample Name: LJ-133-2

```

=====
Acq. Operator   :                               Seq. Line :    7
Acq. Instrument : Instrument 2                  Location  : Vial 62
Injection Date  : 4/13/2019 5:51:17 PM        Inj       :    1
                                                Inj Volume: 5.000 µl
Acq. Method     : D:\DATA\ZX\ZX-3-81\LSL-4-31-3 2019-04-13 13-34-06\DAD-0J(1-6)-95-5-0.5ML-
SUL-ALL-30MIN.M
Last changed    : 4/13/2019 3:13:40 PM
Analysis Method : D:\METHOD\LG\DAD-0J(1-6)-80-20-1ML-SUL-ALL-60MIN.M
Last changed    : 4/14/2019 10:00:29 PM
                (modified after loading)
Additional Info : Peak(s) manually integrated
  
```

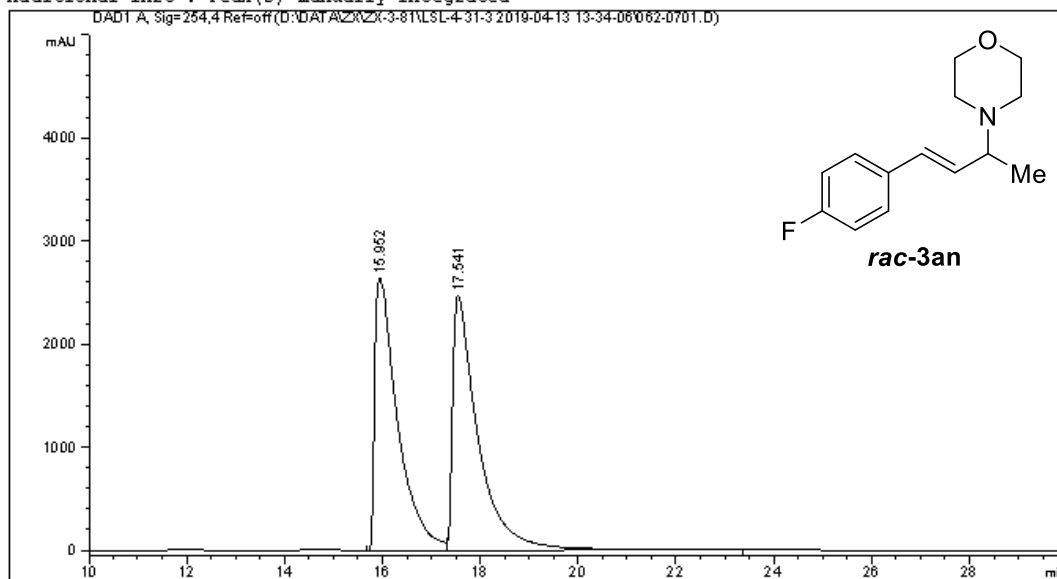

=====  
 Area Percent Report  
 =====

```

Sorted By      :      Signal
Multiplier     :      1.0000
Dilution       :      1.0000
Use Multiplier & Dilution Factor with ISTDs
  
```

Signal 1: DAD1 A, Sig=254,4 Ref=off

| Peak # | RetTime [min] | Type | Width [min] | Area [mAU*s] | Height [mAU] | Area %  |
|--------|---------------|------|-------------|--------------|--------------|---------|
| 1      | 15.952        | BV   | 0.4176      | 8.50486e4    | 2641.95483   | 48.8532 |
| 2      | 17.541        | VB   | 0.4580      | 8.90417e4    | 2473.26196   | 51.1468 |

Totals :                            1.74090e5   5115.21680

**Figure S217.** HPLC spectra of *rac-3an*, related to **Figure 4**.

Data File D:\DATA\ZX\ZX-3-81\LSL-4-31-3 2019-04-13 13-34-06\061-0601.D  
Sample Name: LJ-132-2

```
=====
Acq. Operator   :                               Seq. Line :    6
Acq. Instrument : Instrument 2                   Location  : Vial 61
Injection Date  : 4/13/2019 5:20:17 PM          Inj       :    1
                                                    Inj Volume: 5.000 µl
Acq. Method     : D:\DATA\ZX\ZX-3-81\LSL-4-31-3 2019-04-13 13-34-06\DAD-0J(1-6)-95-5-0.5ML-
                  SUL-ALL-30MIN.M
Last changed    : 4/13/2019 3:13:40 PM
Analysis Method : D:\METHOD\LG\DAD-0J(1-6)-80-20-1ML-SUL-ALL-60MIN.M
Last changed    : 4/14/2019 10:01:44 PM
                  (modified after loading)
Additional Info : Peak(s) manually integrated
=====
```

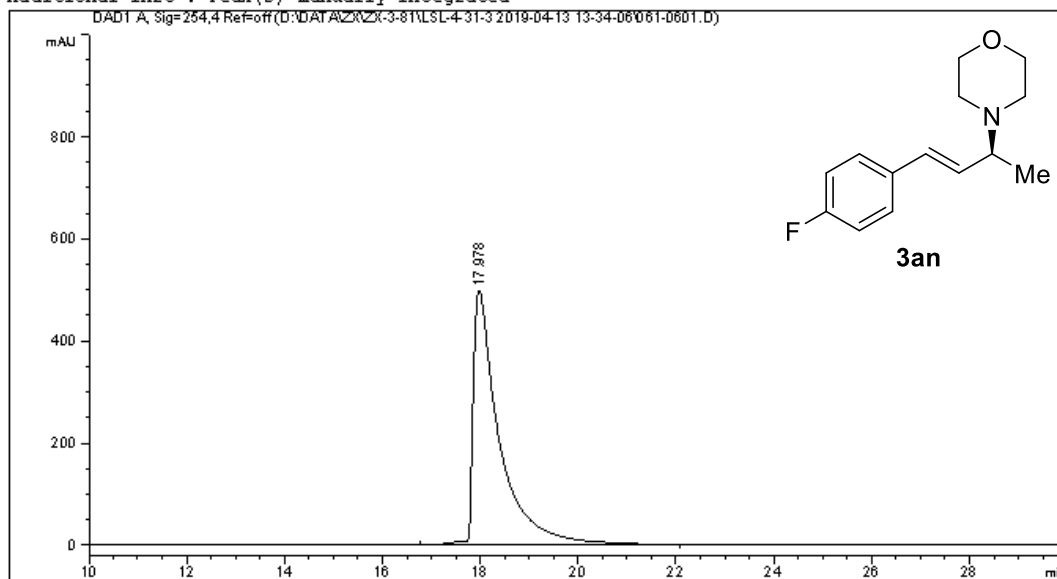

=====  
Area Percent Report  
=====

```
Sorted By      :      Signal
Multiplier     :      1.0000
Dilution       :      1.0000
Use Multiplier & Dilution Factor with ISTDs
```

Signal 1: DAD1 A, Sig=254,4 Ref=off

| Peak # | RetTime [min] | Type | Width [min] | Area [mAU*s] | Height [mAU] | Area %   |
|--------|---------------|------|-------------|--------------|--------------|----------|
| 1      | 17.978        | BB   | 0.5250      | 1.86330e4    | 499.70447    | 100.0000 |

Totals :                    1.86330e4   499.70447

**Figure S218.** HPLC spectra of **3an**, related to **Figure 4**.

Data File D:\DATA\GUAN YUQING\LJ-162\LJ-162(VWD) 2019-05-13 18-18-55\062-0301.D  
Sample Name: LJ-162-1-RAC

```
=====
Acq. Operator   :                               Seq. Line :    3
Acq. Instrument : Instrument 1                   Location  : Vial 62
Injection Date  : 5/13/2019 7:11:38 PM          Inj       :    1
                                                    Inj Volume: 5.000 µl
Acq. Method     : D:\DATA\GUAN YUQING\LJ-162\LJ-162(VWD) 2019-05-13 18-18-55\VWD-AD(1-2)-99-1
                  -0.5ML-5UL-254NM-40MIN.M
Last changed    : 5/13/2019 8:56:49 AM
Analysis Method : D:\METHOD\GUAN YUQING\LONGJIAO\VWD-AD(1-2)-99-1-0.5ML-5UL-254NM-40MIN.M
Last changed    : 5/13/2019 9:42:11 PM
                  (modified after loading)
Additional Info  : Peak(s) manually integrated
=====
```

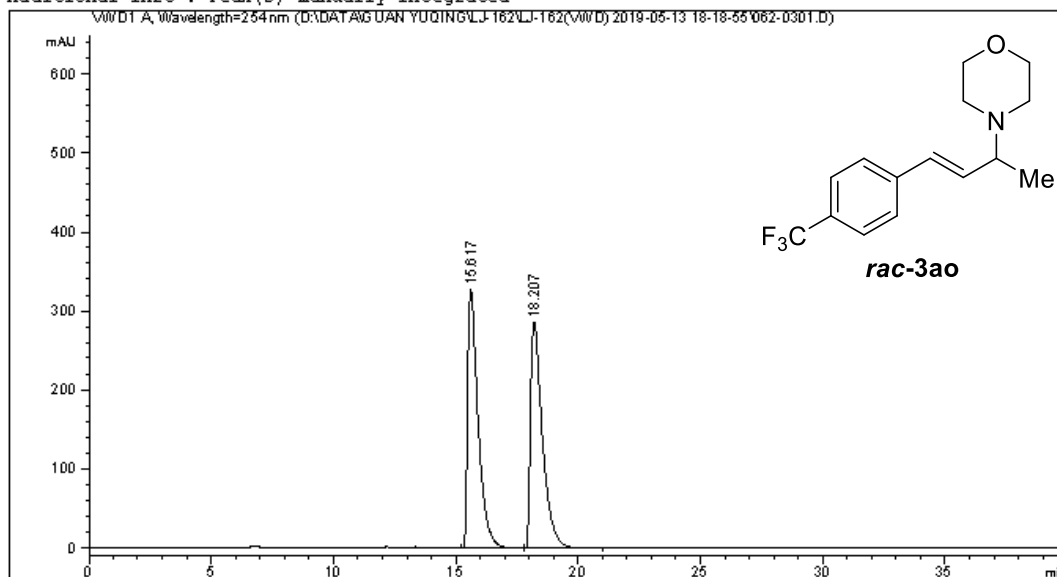

=====  
Area Percent Report  
=====

Sorted By : Signal  
Multiplier : 1.0000  
Dilution : 1.0000  
Use Multiplier & Dilution Factor with ISTDs

Signal 1: VWD1 A, Wavelength=254 nm

| Peak # | RetTime [min] | Type | Width [min] | Area [mAU*s] | Height [mAU] | Area %  |
|--------|---------------|------|-------------|--------------|--------------|---------|
| 1      | 15.617        | BB   | 0.4432      | 9690.17578   | 327.45148    | 49.9852 |
| 2      | 18.207        | BB   | 0.5098      | 9695.92480   | 285.80896    | 50.0148 |

Totals : 1.93861e4 613.26044

Figure S219. HPLC spectra of *rac-3ao*, related to Figure 4.

Data File D:\DATA\GUAN YUQING\LJ-162\LJ-162(VWD) 2019-05-13 18-18-55\061-0201.D  
Sample Name: LJ-162-1

```
=====
Acq. Operator   :                               Seq. Line :    2
Acq. Instrument : Instrument 1                  Location  : Vial 61
Injection Date  : 5/13/2019 6:30:45 PM         Inj       :    1
                                                Inj Volume: 5.000 µl
Acq. Method     : D:\DATA\GUAN YUQING\LJ-162\LJ-162(VWD) 2019-05-13 18-18-55\VWD-AD(1-2)-99-1
                  -0.5ML-5UL-254NM-40MIN.M
Last changed    : 5/13/2019 8:56:49 AM
Analysis Method : D:\METHOD\GUAN YUQING\LONGJIAO\VWD-AD(1-2)-99-1-0.5ML-5UL-254NM-40MIN.M
Last changed    : 5/13/2019 9:43:18 PM
                  (modified after loading)
=====
```

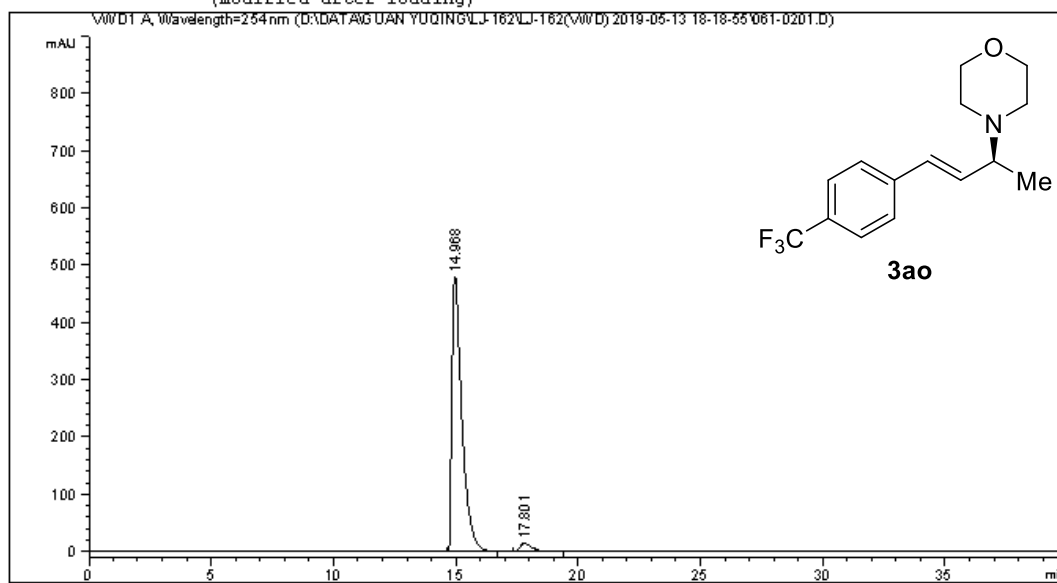

=====  
Area Percent Report  
=====

```
Sorted By      :      Signal
Multiplier     :      1.0000
Dilution       :      1.0000
Use Multiplier & Dilution Factor with ISTDs
```

Signal 1: WVD1 A, Wavelength=254 nm

| Peak # | RetTime [min] | Type | Width [min] | Area [mAU*s] | Height [mAU] | Area %  |
|--------|---------------|------|-------------|--------------|--------------|---------|
| 1      | 14.968        | BB   | 0.4240      | 1.36424e4    | 480.86911    | 96.6598 |
| 2      | 17.801        | BB   | 0.5077      | 471.42413    | 13.93580     | 3.3402  |

Totals :                    1.41138e4   494.80491

Instrument 1 5/13/2019 9:43:23 PM

Page 1 of 1

**Figure S220.** HPLC spectra of **3ao**, related to **Figure 4**.

Data File D:\DATA\LWD\LWD-5-45-5~9\LWD-5-45-5~9 2019-04-27 10-58-26\062-1101.D  
 Sample Name: LJ-150-5-RAC

```

=====
Acq. Operator   :                               Seq. Line :   11
Acq. Instrument : Instrument 2                  Location  : Vial 62
Injection Date  : 4/27/2019 3:24:38 PM         Inj       :    1
                                           Inj Volume: 5.000 µl
Acq. Method     : D:\DATA\LWD\LWD-5-45-5~9\LWD-5-45-5~9 2019-04-27 10-58-26\DAD-OD(1-2)-99-1-
0.5ML-SUL-ALL-40MIN.M
Last changed    : 3/8/2019 11:06:52 AM
Analysis Method : D:\DATA\LWD\LWD-5-45-5~9\LWD-5-45-5~9 2019-04-27 10-58-26\DAD-OD(1-2)-99-1-
0.5ML-SUL-ALL-40MIN.M (Sequence Method)
Last changed    : 4/28/2019 6:43:34 PM
                 (modified after loading)
  
```

Additional Info : Peak(s) manually integrated

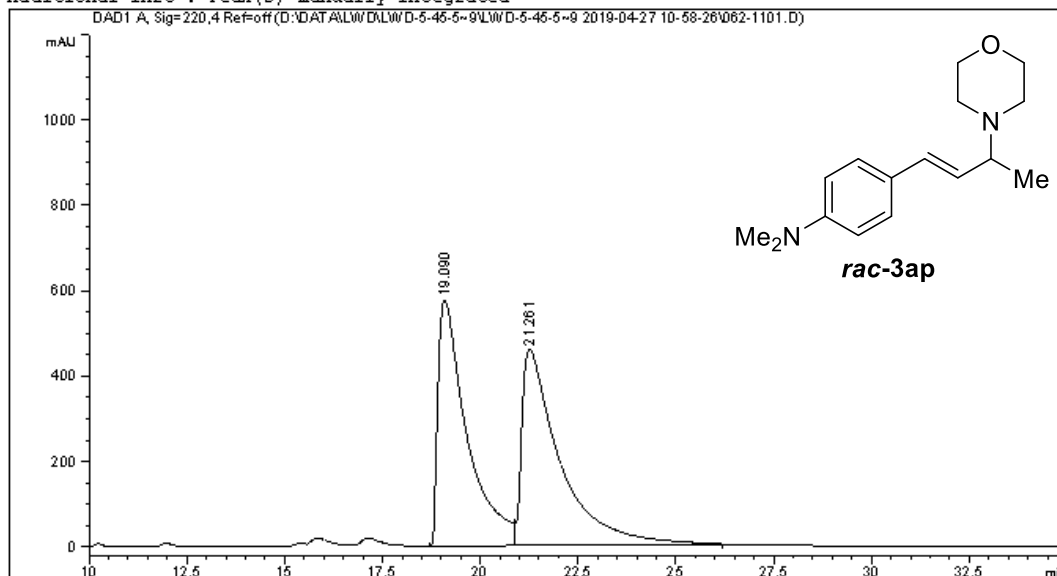

=====  
 Area Percent Report  
 =====

```

Sorted By      :      Signal
Multiplier     :      1.0000
Dilution       :      1.0000
Use Multiplier & Dilution Factor with ISTDs
  
```

Signal 1: DAD1 A, Sig=220,4 Ref=off

| Peak # | RetTime [min] | Type | Width [min] | Area [mAU*s] | Height [mAU] | Area %  |
|--------|---------------|------|-------------|--------------|--------------|---------|
| 1      | 19.090        | BV   | 0.7033      | 2.94362e4    | 576.84332    | 48.6728 |
| 2      | 21.261        | VB   | 0.8915      | 3.10416e4    | 458.71768    | 51.3272 |

Totals :                    6.04778e4  1035.56100

**Figure S221.** HPLC spectra of *rac-3ap*, related to **Figure 4**.



Data File D:\DATA\LWD\LWD-5-45-5~9\LWD-5-45-5~9 2019-04-27 10-58-26\061-1001.D  
Sample Name: LJ-150-5

```
=====
Acq. Operator   :                               Seq. Line :   10
Acq. Instrument : Instrument 2                   Location  : Vial 61
Injection Date  : 4/27/2019 2:43:37 PM          Inj       :    1
                                                    Inj Volume: 5.000 µl
Acq. Method     : D:\DATA\LWD\LWD-5-45-5~9\LWD-5-45-5~9 2019-04-27 10-58-26\DAD-OD(1-2)-99-1-
                  0.5ML-SUL-ALL-40MIN.M
Last changed    : 3/8/2019 11:06:52 AM
Analysis Method : D:\DATA\LWD\LWD-5-45-5~9\LWD-5-45-5~9 2019-04-27 10-58-26\DAD-OD(1-2)-99-1-
                  0.5ML-SUL-ALL-40MIN.M (Sequence Method)
Last changed    : 4/28/2019 6:45:59 PM
                  (modified after loading)
Additional Info : Peak(s) manually integrated
```

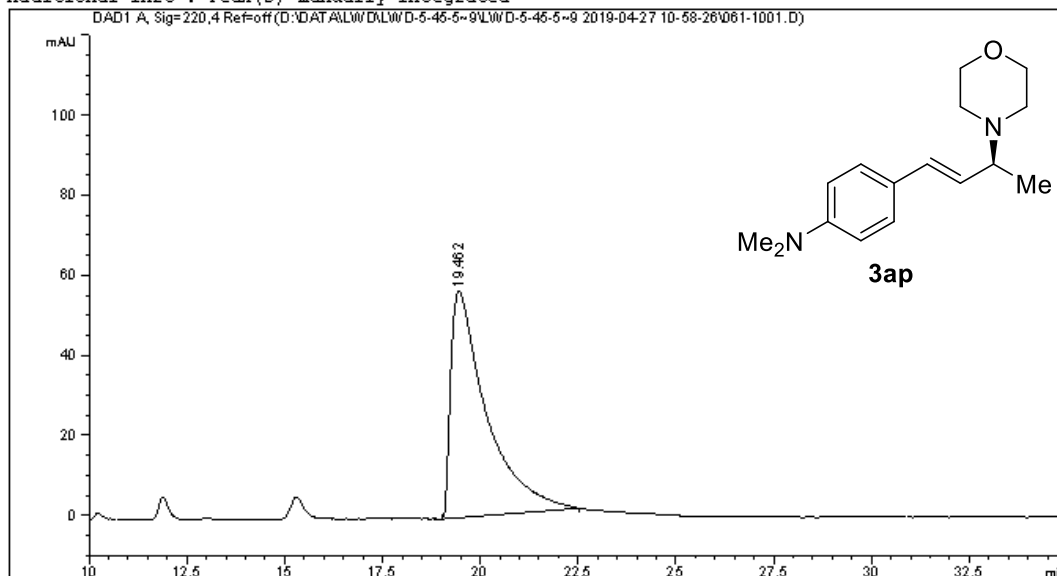

=====  
Area Percent Report  
=====

Sorted By : Signal  
Multiplier : 1.0000  
Dilution : 1.0000  
Use Multiplier & Dilution Factor with ISTDs

Signal 1: DAD1 A, Sig=220,4 Ref=off

| Peak # | RetTime [min] | Type | Width [min] | Area [mAU*s] | Height [mAU] | Area %   |
|--------|---------------|------|-------------|--------------|--------------|----------|
| 1      | 19.462        | BB   | 0.7553      | 3590.59058   | 56.51189     | 100.0000 |

Totals : 3590.59058 56.51189

**Figure S222.** HPLC spectra of **3ap**, related to **Figure 4**.



Data File D:\DATA\GUAN YUQING\LJ-2-26\LJ-2-26 2019-08-13 22-15-46\081-0201.D  
Sample Name: LJ-2-26-8

```
=====
Acq. Operator   :                               Seq. Line :    2
Acq. Instrument : Instrument 1                  Location  : Vial 81
Injection Date  : 8/13/2019 10:31:48 PM       Inj       :    1
                                                Inj Volume: 5.000 µl
Acq. Method     : D:\DATA\GUAN YUQING\LJ-2-26\LJ-2-26 2019-08-13 22-15-46\WVD-0J(1-2)-95-5-0.
                                                SML-5UL-254NM-40MIN.M
Last changed    : 8/13/2019 10:44:25 PM
                                                (modified after loading)
Analysis Method : D:\METHOD\LG\WVD-AD(1-2)-80-20-1ML-3UL-210NM-60MIN.M
Last changed    : 8/14/2019 10:13:25 AM
                                                (modified after loading)
=====
```

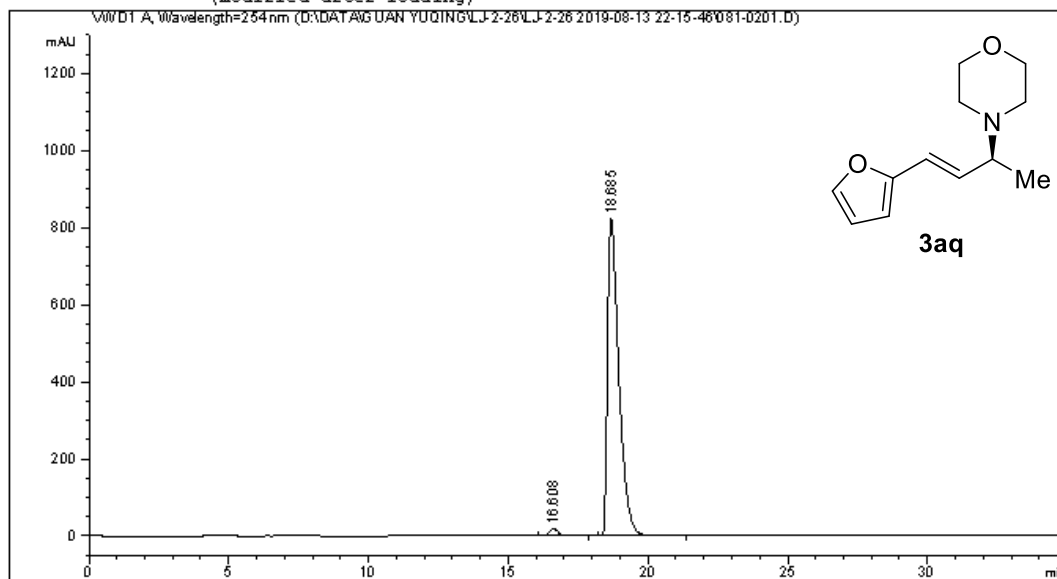

=====  
Area Percent Report  
=====

Sorted By : Signal  
Multiplier : 1.0000  
Dilution : 1.0000  
Use Multiplier & Dilution Factor with ISTDs

Signal 1: WVD1 A, Wavelength=254 nm

| Peak # | RetTime [min] | Type | Width [min] | Area [mAU*s] | Height [mAU] | Area %  |
|--------|---------------|------|-------------|--------------|--------------|---------|
| 1      | 16.608        | BB   | 0.3357      | 430.80255    | 19.50537     | 1.8249  |
| 2      | 18.685        | BB   | 0.4228      | 2.31767e4    | 822.39478    | 98.1751 |

Totals : 2.36075e4 841.90014

**Figure S224.** HPLC spectra of **3aq**, related to **Figure 4**.

Data File D:\DATA\GUAN YUQING\LJ-2-34\LJ-2-34 2019-08-22 19-27-53\093-0401.D  
 Sample Name: LJ-2-34-RAC

```

=====
Acq. Operator   :                               Seq. Line :    4
Acq. Instrument : Instrument 1                   Location  : Vial 93
Injection Date  : 8/22/2019 8:06:29 PM          Inj       :    1
                                                    Inj Volume: 5.000 µl
Acq. Method     : D:\DATA\GUAN YUQING\LJ-2-34\2019-08-22 19-27-53\WVD-0J(1-2)-95-5-0.
                  SML-5UL-254NM-20MIN.M
Last changed    : 8/22/2019 7:29:22 PM
Analysis Method : D:\METHOD\GUAN YUQING\LONGJIAO\WVD-0J(1-2)-95-5-0.SML-5UL-254NM-20MIN.M
Last changed    : 8/22/2019 8:24:04 PM
                  (modified after loading)
Additional Info : Peak(s) manually integrated
  
```

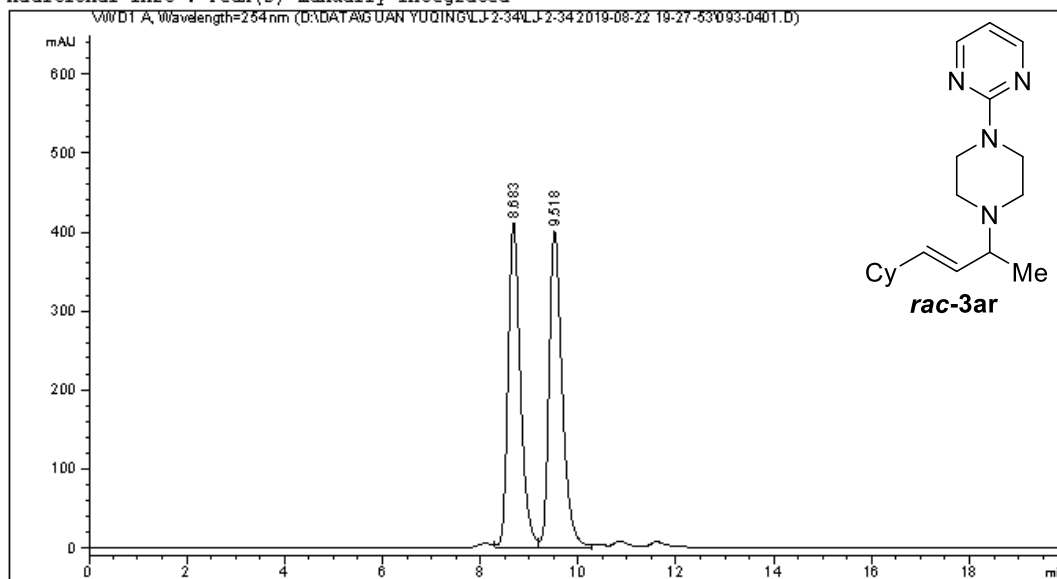

=====  
 Area Percent Report  
 =====

```

Sorted By      :      Signal
Multiplier     :      1.0000
Dilution       :      1.0000
Use Multiplier & Dilution Factor with ISTDs
  
```

Signal 1: WVD1 A, Wavelength=254 nm

| Peak # | RetTime [min] | Type | Width [min] | Area [mAU*s] | Height [mAU] | Area %  |
|--------|---------------|------|-------------|--------------|--------------|---------|
| 1      | 8.683         | VV   | 0.2682      | 7229.00488   | 410.94553    | 49.3700 |
| 2      | 9.518         | VV   | 0.2810      | 7413.50635   | 400.48196    | 50.6300 |

Totals :                      1.46425e4    811.42749

**Figure S225.** HPLC spectra of *rac-3ar*, related to **Figure 4**.

Data File D:\DATA\GUAN YUQING\LJ-2-34\LJ-2-34 2019-08-22 19-27-53\092-0301.D  
Sample Name: LJ-2-34

```
=====
Acq. Operator   :                               Seq. Line :    3
Acq. Instrument : Instrument 1                   Location  : Vial 92
Injection Date  : 8/22/2019 7:45:39 PM          Inj       :    1
                                                    Inj Volume: 5.000 µl
Acq. Method     : D:\DATA\GUAN YUQING\LJ-2-34\2019-08-22 19-27-53\WVD-0J(1-2)-95-5-0.
                  SML-5UL-254NM-20MIN.M
Last changed    : 8/22/2019 7:29:22 PM
Analysis Method : D:\METHOD\GUAN YUQING\LONGJIAO\WVD-0J(1-2)-95-5-0.SML-5UL-254NM-20MIN.M
Last changed    : 8/22/2019 8:24:04 PM
                  (modified after loading)
Additional Info  : Peak(s) manually integrated
=====
```

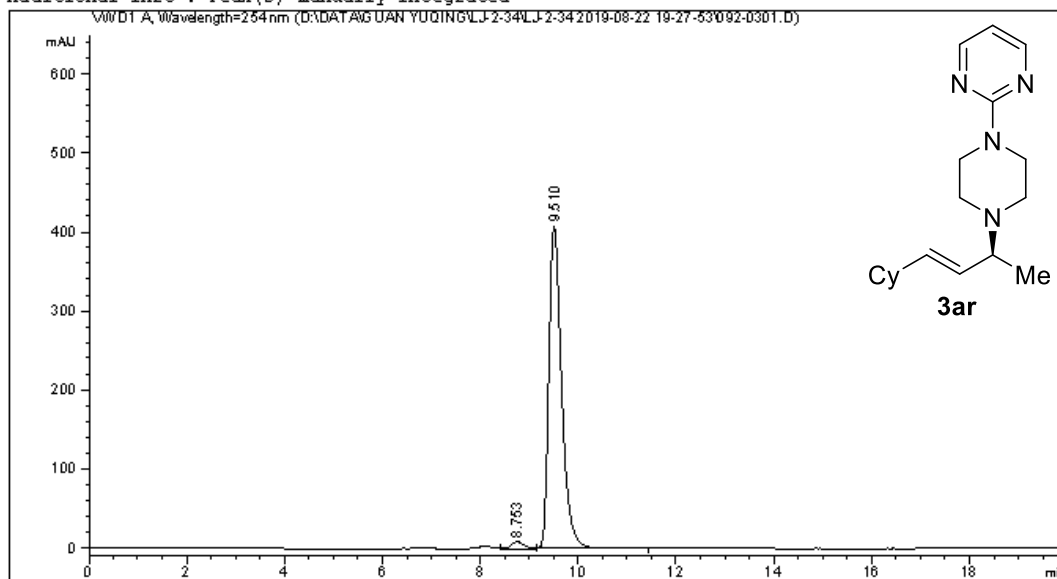

=====  
Area Percent Report  
=====

Sorted By : Signal  
Multiplier : 1.0000  
Dilution : 1.0000  
Use Multiplier & Dilution Factor with ISTDs

Signal 1: WVD1 A, Wavelength=254 nm

| Peak # | RetTime [min] | Type | Width [min] | Area [mAU*s] | Height [mAU] | Area %  |
|--------|---------------|------|-------------|--------------|--------------|---------|
| 1      | 8.753         | VV   | 0.2816      | 161.11761    | 8.63663      | 2.1291  |
| 2      | 9.510         | VB   | 0.2766      | 7406.44824   | 408.39880    | 97.8709 |

Totals : 7567.56586 417.03543

Figure S226. HPLC spectra of 3ar, related to Figure 4.

Data File D:\DATA\GUAN YUQING\LJ-2-58\LJ-2-58 2019-10-04 14-59-34\086-1001.D  
Sample Name: LJ-2-58-3-RAC

```
=====
Acq. Operator   :                               Seq. Line :   10
Acq. Instrument : Instrument 1                   Location  : Vial 86
Injection Date  : 10/4/2019 6:18:32 PM          Inj       :    1
                                                    Inj Volume: 5.000 µl
Acq. Method     : D:\DATA\GUAN YUQING\LJ-2-58\LJ-2-58 2019-10-04 14-59-34\WVD-OD(1-2)-95-5-0.
                  SML-5UL-254NM-30MIN.M
Last changed    : 10/4/2019 3:08:34 PM
Analysis Method : D:\METHOD\GUAN YUQING\LONGJIAO\WVD-OD(1-2)-95-5-0.SML-5UL-254NM-10MIN.M
Last changed    : 10/4/2019 7:06:32 PM
                  (modified after loading)
Additional Info : Peak(s) manually integrated
=====
```

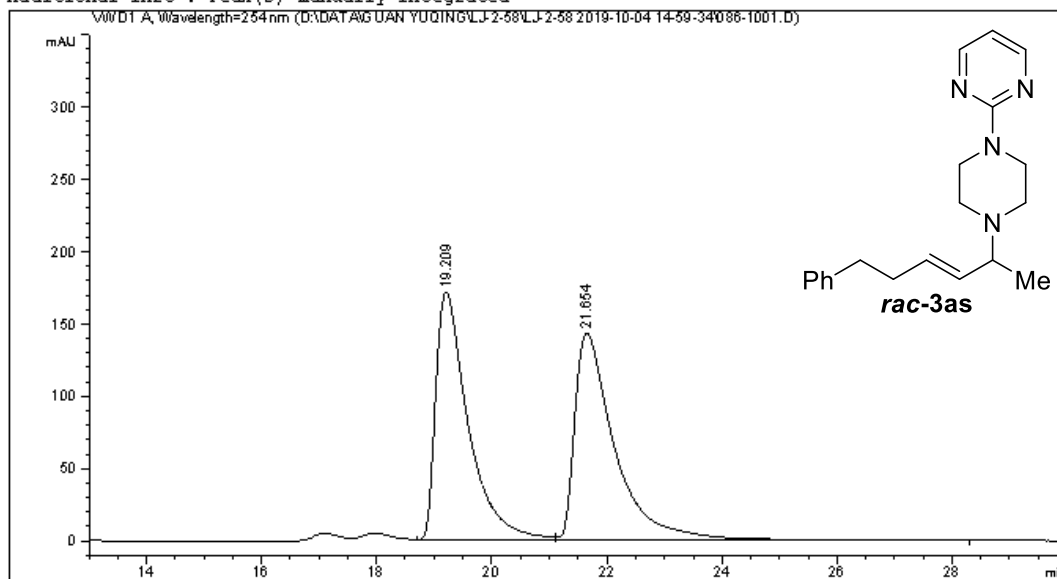

=====  
Area Percent Report  
=====

Sorted By : Signal  
Multiplier : 1.0000  
Dilution : 1.0000  
Use Multiplier & Dilution Factor with ISTDs

Signal 1: WVD1 A, Wavelength=254 nm

| Peak # | RetTime [min] | Type | Width [min] | Area [mAU*s] | Height [mAU] | Area %  |
|--------|---------------|------|-------------|--------------|--------------|---------|
| 1      | 19.209        | BV   | 0.5768      | 6710.61328   | 171.37782    | 49.2813 |
| 2      | 21.654        | VB   | 0.7120      | 6906.34668   | 143.11708    | 50.7187 |

Totals : 1.36170e4 314.49490

Figure S227. HPLC spectra of *rac-3as*, related to Figure 4.

Data File D:\DATA\GUAN YUQING\LJ-2-58\LJ-2-58 2019-10-04 14-59-34\085-0901.D  
Sample Name: LJ-2-58-3

```
=====
Acq. Operator   :                               Seq. Line :    9
Acq. Instrument : Instrument 1                   Location  : Vial 85
Injection Date  : 10/4/2019 5:47:42 PM          Inj       :    1
                                                    Inj Volume: 5.000 µl

Acq. Method     : D:\DATA\GUAN YUQING\LJ-2-58\LJ-2-58 2019-10-04 14-59-34\WVD1-OD(1-2)-95-5-0.
                  SML-5UL-254NM-30MIN.M
Last changed    : 10/4/2019 3:08:34 PM
Analysis Method : D:\METHOD\GUAN YUQING\LONGJIAO\WVD1-OD(1-2)-95-5-0.SML-5UL-254NM-10MIN.M
Last changed    : 10/4/2019 7:07:41 PM
                  (modified after loading)
=====
```

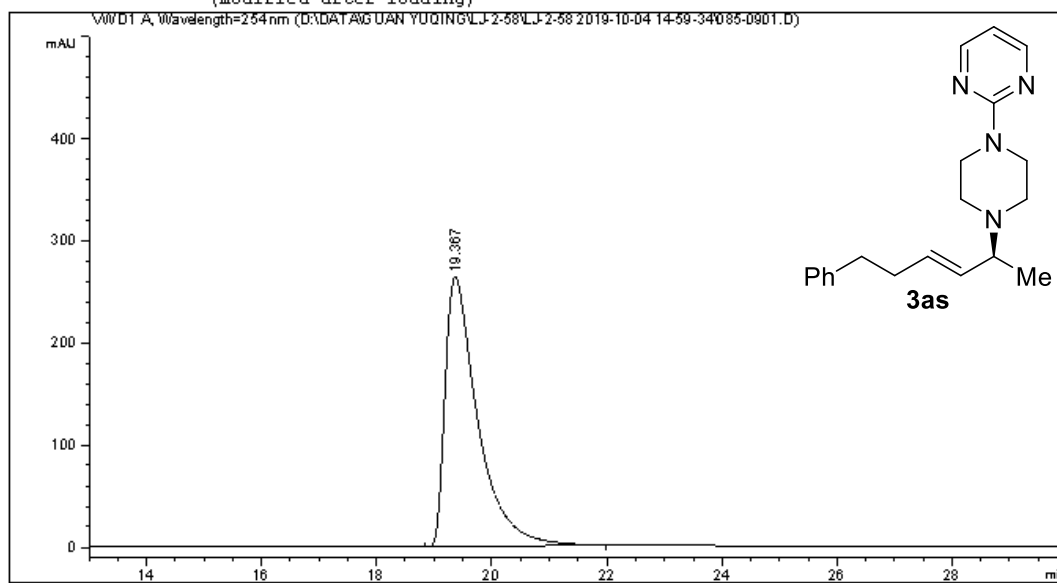

=====  
Area Percent Report  
=====

Sorted By : Signal  
Multiplier : 1.0000  
Dilution : 1.0000  
Use Multiplier & Dilution Factor with ISTDs

Signal 1: WVD1 A, Wavelength=254 nm

| Peak # | RetTime [min] | Type | Width [min] | Area [mAU*s] | Height [mAU] | Area %   |
|--------|---------------|------|-------------|--------------|--------------|----------|
| 1      | 19.367        | BB   | 0.5810      | 1.04212e4    | 264.28088    | 100.0000 |

Totals : 1.04212e4 264.28088

=====  
\*\*\* End of Report \*\*\*

Instrument 1 10/4/2019 7:07:57 PM

Page 1 of 1

**Figure S228.** HPLC spectra of **3as**, related to **Figure 4**.

Data File D:\DATA\GUAN YUQING\LJ-2-58\LJ-2-58 2019-10-04 14-59-34\082-0401.D  
Sample Name: LJ-2-58-1-RAC

```
=====
Acq. Operator   :                               Seq. Line :    4
Acq. Instrument : Instrument 1                   Location  : Vial 82
Injection Date  : 10/4/2019 3:58:10 PM          Inj       :    1
                                                    Inj Volume: 5.000 µl
Acq. Method     : D:\DATA\GUAN YUQING\LJ-2-58\LJ-2-58 2019-10-04 14-59-34\WVD-OJ(1-6)-95-5-0.
                  SML-5UL-220NM-25MIN.M
Last changed    : 10/4/2019 2:55:51 PM
Analysis Method : D:\METHOD\GUAN YUQING\LONGJIAO\WVD-OD(1-2)-95-5-0.SML-5UL-254NM-10MIN.M
Last changed    : 10/4/2019 6:56:30 PM
                  (modified after loading)
Additional Info  : Peak(s) manually integrated
=====
```

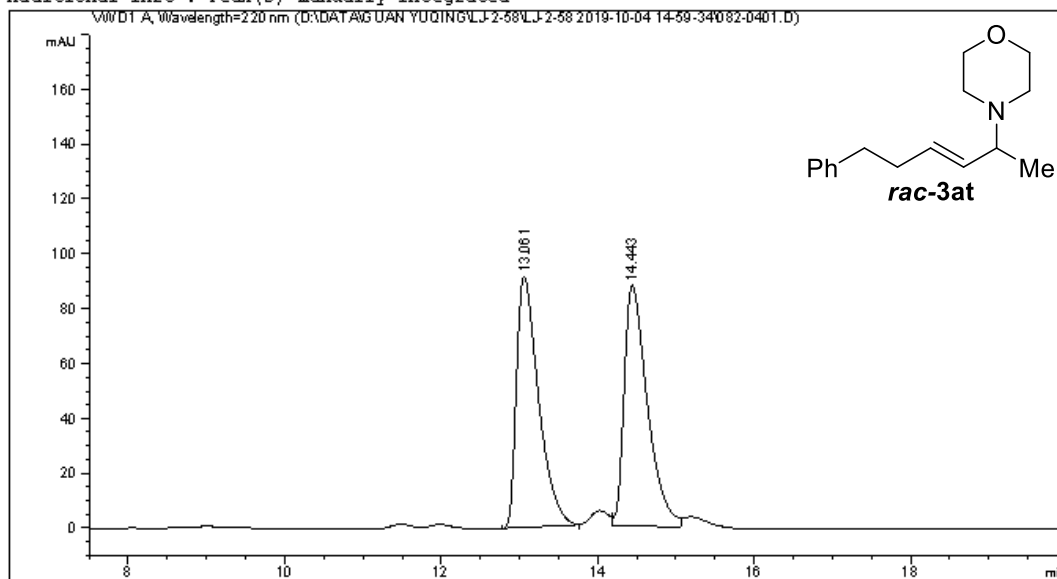

=====  
Area Percent Report  
=====

Sorted By : Signal  
Multiplier : 1.0000  
Dilution : 1.0000  
Use Multiplier & Dilution Factor with ISTDs

Signal 1: WVD1 A, Wavelength=220 nm

| Peak # | RetTime [min] | Type | Width [min] | Area [mAU*s] | Height [mAU] | Area %  |
|--------|---------------|------|-------------|--------------|--------------|---------|
| 1      | 13.061        | BB   | 0.2980      | 1793.32349   | 91.35478     | 49.7739 |
| 2      | 14.443        | VV   | 0.3104      | 1809.61426   | 87.80449     | 50.2261 |

Totals : 3602.93774 179.15927

Figure S229. HPLC spectra of *rac-3at*, related to Figure 4.





Data File D:\DATA\GUAN YUQING\LJ-2-28\LJ-2-28 2019-08-17 17-49-47\093-0301.D  
Sample Name: LJ-2-28-RAC

```
=====
Acq. Operator   :                               Seq. Line :    3
Acq. Instrument : Instrument 1                   Location  : Vial 93
Injection Date  : 8/17/2019 7:08:37 PM          Inj       :    1
                                                    Inj Volume: 5.000 µl
Acq. Method     : D:\DATA\GUAN YUQING\LJ-2-28\2019-08-17 17-49-47\WVD-AS(1-6)-99-1-0.
                  SML-5UL-220NM-60MIN.M
Last changed    : 4/29/2019 8:58:31 AM
Analysis Method : D:\METHOD\LWD\DAD-OD (1-2)-90-10-LML-3ULALL-25MIN.M
Last changed    : 8/19/2019 9:39:21 AM
                  (modified after loading)
Additional Info  : Peak(s) manually integrated
=====
```

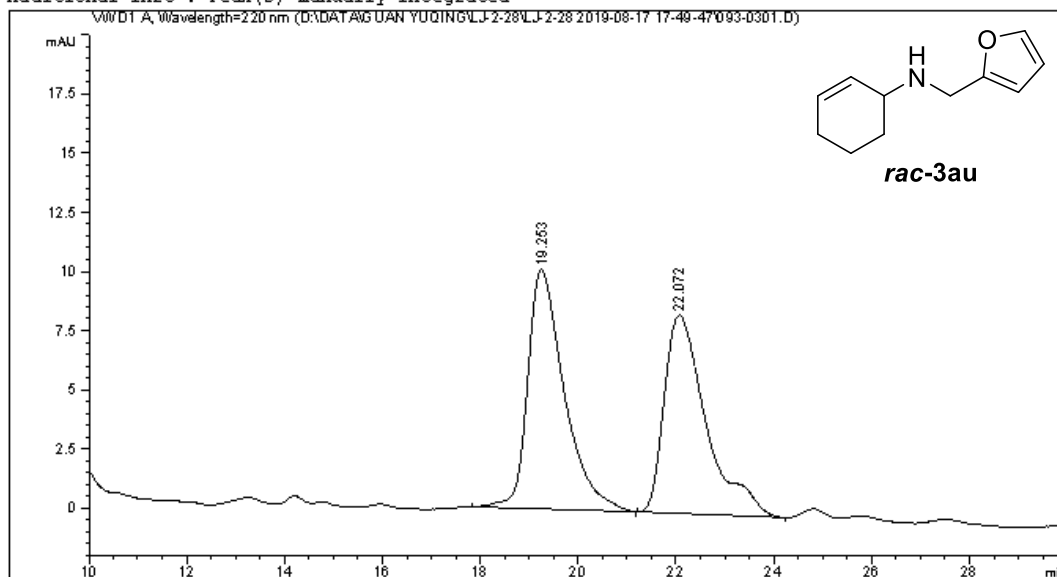

=====  
Area Percent Report  
=====

```
Sorted By      :      Signal
Multiplier     :      1.0000
Dilution       :      1.0000
Use Multiplier & Dilution Factor with ISTDs
```

Signal 1: WVD1 A, Wavelength=220 nm

| Peak # | RetTime [min] | Type | Width [min] | Area [mAU*s] | Height [mAU] | Area %  |
|--------|---------------|------|-------------|--------------|--------------|---------|
| 1      | 19.253        | BB   | 0.7624      | 523.16156    | 10.09827     | 51.2498 |
| 2      | 22.072        | BB   | 0.8799      | 497.64478    | 8.36683      | 48.7502 |

Totals :                                   1020.80634   18.46510

**Figure S231.** HPLC spectra of *rac-3au*, related to **Figure 4**.

Data File D:\DATA\GUAN YUQING\LJ-2-28\LJ-2-28 2019-08-17 17-49-47\092-0201.D  
Sample Name: LJ-2-28

```
=====
Acq. Operator   :                               Seq. Line :    2
Acq. Instrument : Instrument 1                   Location  : Vial 92
Injection Date  : 8/17/2019 6:07:48 PM          Inj       :    1
                                                    Inj Volume: 5.000 µl
Acq. Method     : D:\DATA\GUAN YUQING\LJ-2-28 2019-08-17 17-49-47\WVD-AS(1-6)-99-1-0.
                  SML-5UL-220NM-60MIN.M
Last changed    : 4/29/2019 8:58:31 AM
Analysis Method : D:\METHOD\LWD\DAD-OD (1-2)-90-10-1ML-3ULALL-25MIN.M
Last changed    : 8/19/2019 9:41:54 AM
                  (modified after loading)
Additional Info : Peak(s) manually integrated
=====
```

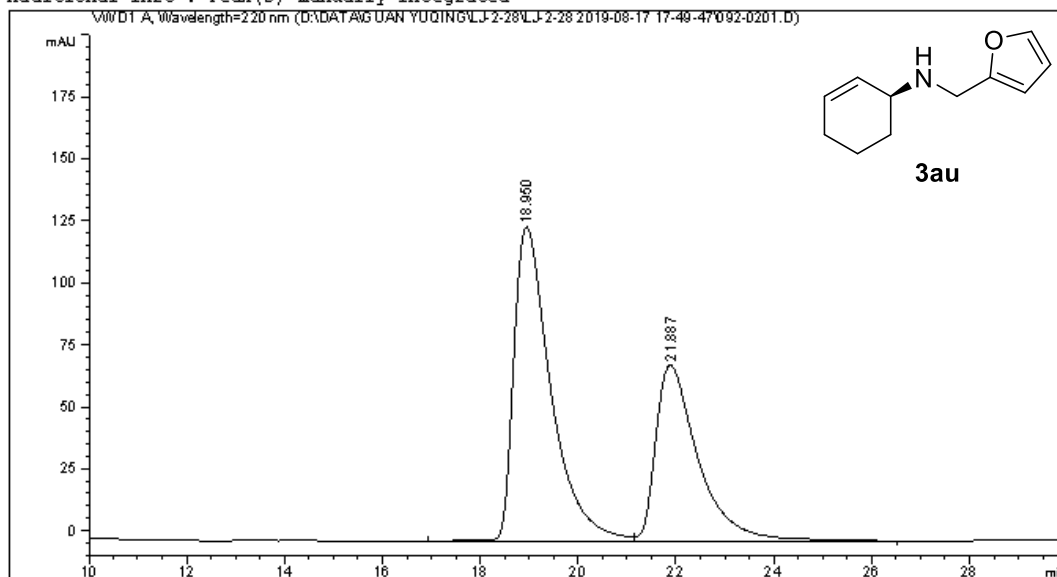

=====  
Area Percent Report  
=====

```
Sorted By      :      Signal
Multiplier     :      1.0000
Dilution       :      1.0000
Use Multiplier & Dilution Factor with ISTDs
```

Signal 1: WVD1 A, Wavelength=220 nm

| Peak # | RetTime [min] | Type | Width [min] | Area [mAU*s] | Height [mAU] | Area %  |
|--------|---------------|------|-------------|--------------|--------------|---------|
| 1      | 18.950        | BV   | 0.7841      | 6617.87891   | 126.55463    | 60.8880 |
| 2      | 21.887        | VB   | 0.8940      | 4251.05322   | 70.85488     | 39.1120 |

Totals :                                    1.08689e4    197.40951

Figure S232. HPLC spectra of 3au, related to Figure 4.





Data File D:\DATA\GUAN YUQING\LJ-2-16\LJ-2-16 2019-07-16 20-59-13\002-0301.D  
 Sample Name: LJ-2-16-RAC

```

=====
Acq. Operator   :                               Seq. Line :    3
Acq. Instrument : Instrument 1                   Location  : Vial 2
Injection Date  : 7/16/2019 9:56:06 PM          Inj       :    1
                                           Inj Volume: 5.000 µl

Acq. Method     : D:\DATA\GUAN YUQING\LJ-2-16\LJ-2-16 2019-07-16 20-59-13\WVD-AD(1-2)-85-15-
                  1ML-5UL-254NM-40MIN.M
Last changed    : 4/17/2019 5:00:46 PM
Analysis Method : D:\METHOD\LSL\DAD-OD(1-2)-97-3-1ML-5UL-ALL-60MIN.M
Last changed    : 7/19/2019 8:11:26 PM
                  (modified after loading)
Additional Info  : Peak(s) manually integrated
  
```

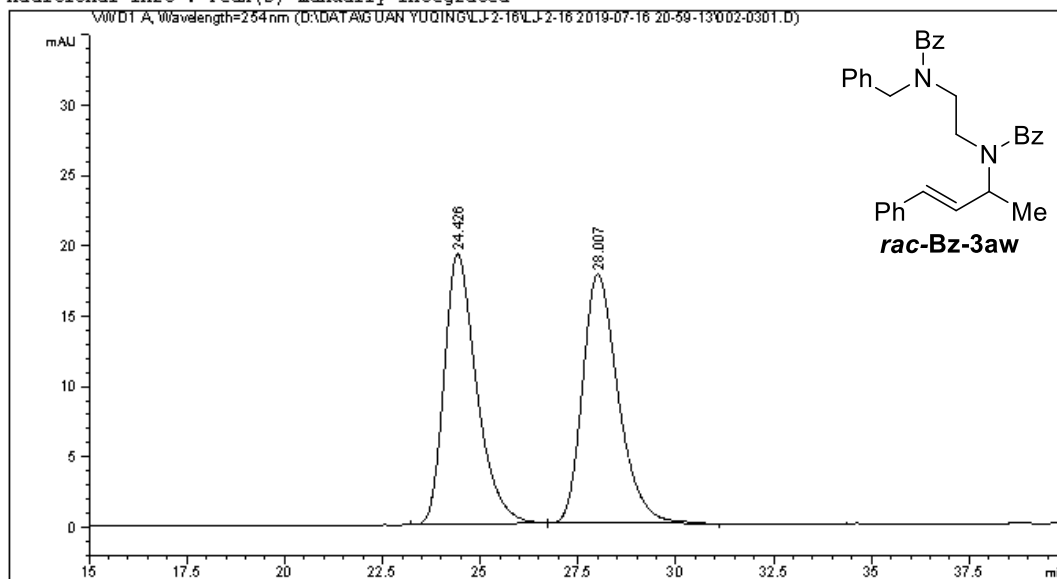

=====  
 Area Percent Report  
 =====

```

Sorted By      :      Signal
Multiplier     :      1.0000
Dilution       :      1.0000
Use Multiplier & Dilution Factor with ISTDs
  
```

Signal 1: WVD1 A, Wavelength=254 nm

| Peak # | RetTime [min] | Type | Width [min] | Area [mAU*s] | Height [mAU] | Area %  |
|--------|---------------|------|-------------|--------------|--------------|---------|
| 1      | 24.426        | BB   | 0.8642      | 1106.68665   | 19.20644     | 49.6651 |
| 2      | 28.007        | BB   | 0.9601      | 1121.61011   | 17.67954     | 50.3349 |

Totals :                                    2228.29675    36.88599

Figure S235. HPLC spectra of *rac-Bz-3aw*, related to Figure 5.

Data File D:\DATA\GUAN YUQING\LJ-2-16\LJ-2-16 2019-07-16 20-59-13\001-0201.D  
 Sample Name: LJ-2-16

```

=====
Acq. Operator   :                               Seq. Line :    2
Acq. Instrument : Instrument 1                   Location  : Vial 1
Injection Date  : 7/16/2019 9:15:17 PM          Inj       :    1
                                                    Inj Volume: 5.000 µl

Acq. Method     : D:\DATA\GUAN YUQING\LJ-2-16\LJ-2-16 2019-07-16 20-59-13\WVD-AD(1-2)-85-15-
                  1ML-5UL-254NM-40MIN.M
Last changed    : 4/17/2019 5:00:46 PM
Analysis Method : D:\METHOD\LSL\DAD-OD(1-2)-97-3-1ML-5UL-ALL-60MIN.M
Last changed    : 7/19/2019 8:13:02 PM
                  (modified after loading)
Additional Info  : Peak(s) manually integrated
  
```

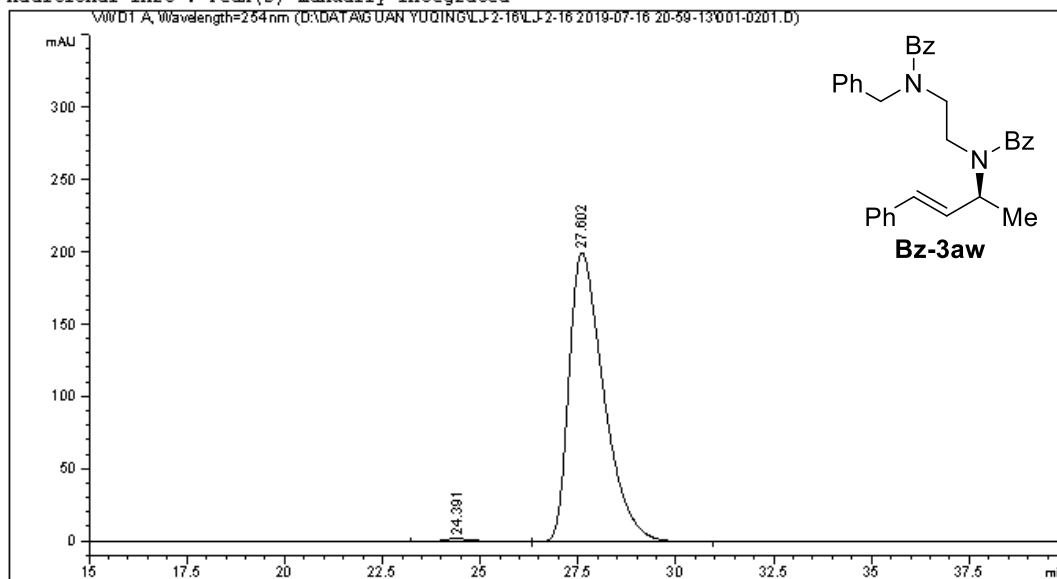

=====  
 Area Percent Report  
 =====

```

Sorted By      :      Signal
Multiplier     :      1.0000
Dilution       :      1.0000
Use Multiplier & Dilution Factor with ISTDs
  
```

Signal 1: WVD1 A, Wavelength=254 nm

| Peak # | RetTime [min] | Type | Width [min] | Area [mAU*s] | Height [mAU] | Area %  |
|--------|---------------|------|-------------|--------------|--------------|---------|
| 1      | 24.391        | BB   | 0.8115      | 127.46741    | 2.11982      | 1.0228  |
| 2      | 27.602        | BB   | 0.9399      | 1.23356e4    | 199.90909    | 98.9772 |

Totals :                            1.24631e4    202.02891

**Figure S236.** HPLC spectra of **Bz-3aw**, related to **Figure 5**.

Data File D:\DATA\LWD\LY-2-1-DIWU\LY-2-1DIWU 2019-04-16 15-39-34\081-1401.D  
 Sample Name: LJ-137-6-RAC

```

=====
Acq. Operator   :                               Seq. Line :   14
Acq. Instrument : Instrument 1                   Location  : Vial 81
Injection Date  : 4/16/2019 8:39:31 PM          Inj       :    1
                                                    Inj Volume: 5.000 µl

Acq. Method     : D:\DATA\LWD\LY-2-1-DIWU\LY-2-1DIWU 2019-04-16 15-39-34\VWD-AD(1-2)-99-1-0.
                  SML-5UL-254NM-60MIN.M
Last changed    : 4/16/2019 4:38:17 PM
Analysis Method : D:\DATA\LWD\LY-2-1-DIWU\LY-2-1DIWU 2019-04-16 15-39-34\VWD-AD(1-2)-99-1-0.
                  SML-5UL-254NM-60MIN.M (Sequence Method)
Last changed    : 4/17/2019 8:04:38 PM
                  (modified after loading)
  
```

Additional Info : Peak(s) manually integrated

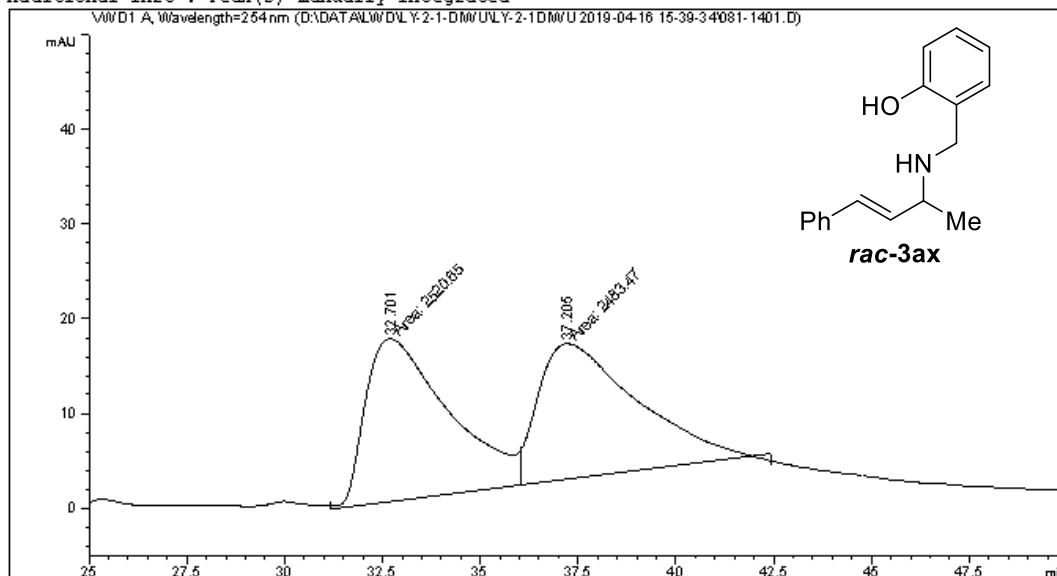

=====  
 Area Percent Report  
 =====

```

Sorted By      :      Signal
Multiplier     :      1.0000
Dilution       :      1.0000
Use Multiplier & Dilution Factor with ISTDs
  
```

Signal 1: WVD1 A, Wavelength=254 nm

| Peak # | RetTime [min] | Type | Width [min] | Area [mAU*s] | Height [mAU] | Area %  |
|--------|---------------|------|-------------|--------------|--------------|---------|
| 1      | 32.701        | MF   | 2.4469      | 2520.65356   | 17.16935     | 50.3716 |
| 2      | 37.205        | FM   | 2.8903      | 2483.46680   | 14.32087     | 49.6284 |

Totals :                    5004.12036    31.49022

**Figure S237.** HPLC spectra of *rac-3ax*, related to **Figure 5**.



Data File D:\DATA\LWD\LY-2-1-DIWU\LY-2-1DIWU 2019-04-16 15-39-34\082-1501.D  
Sample Name: LJ-137-6

```
=====
Acq. Operator   :                               Seq. Line :   15
Acq. Instrument : Instrument 1                   Location  : Vial 82
Injection Date  : 4/16/2019 9:40:22 PM          Inj       :    1
                                                    Inj Volume: 5.000 µl

Acq. Method     : D:\DATA\LWD\LY-2-1-DIWU\LY-2-1DIWU 2019-04-16 15-39-34\VWD-AD(1-2)-99-1-0.
                  SML-5UL-254NM-60MIN.M
Last changed    : 4/16/2019 4:38:17 PM
Analysis Method : D:\DATA\LWD\LY-2-1-DIWU\LY-2-1DIWU 2019-04-16 15-39-34\VWD-AD(1-2)-99-1-0.
                  SML-5UL-254NM-60MIN.M (Sequence Method)
Last changed    : 4/17/2019 8:07:01 PM
                  (modified after loading)
Additional Info : Peak(s) manually integrated
```

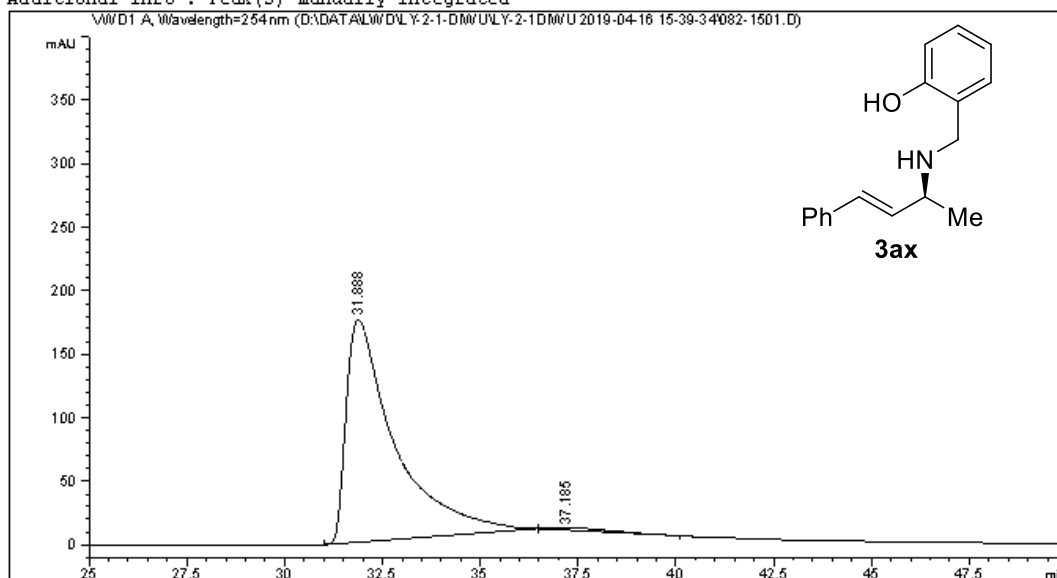

=====  
Area Percent Report  
=====

Sorted By : Signal  
Multiplier : 1.0000  
Dilution : 1.0000  
Use Multiplier & Dilution Factor with ISTDs

Signal 1: WVD1 A, Wavelength=254 nm

| Peak # | RetTime [min] | Type | Width [min] | Area [mAU*s] | Height [mAU] | Area %  |
|--------|---------------|------|-------------|--------------|--------------|---------|
| 1      | 31.888        | BB   | 1.2270      | 1.51677e4    | 175.21049    | 98.5994 |
| 2      | 37.185        | BB   | 1.4597      | 215.46088    | 1.73517      | 1.4006  |

Totals : 1.53832e4 176.94567

**Figure S238.** HPLC spectra of **3ax**, related to **Figure 5**.

Data File D:\DATA\LSL\LSL-4-45\LSL-4-45 2019-04-28 17-54-38\093-1801.D  
 Sample Name: LJ-148-4-RAC

```

=====
Acq. Operator   :                               Seq. Line :   18
Acq. Instrument : Instrument 2                   Location  : Vial 93
Injection Date  : 4/29/2019 4:26:23 AM          Inj       :    1
                                                    Inj Volume: 5.000 µl

Acq. Method     : D:\DATA\LSL\LSL-4-45\LSL-4-45 2019-04-28 17-54-38\DAD-OD(1-2)-80-20-0.5ML-
                  SUL-ALL-45MIN.M
Last changed    : 4/28/2019 10:10:52 PM
Analysis Method : D:\DATA\LSL\LSL-4-45\LSL-4-45 2019-04-28 17-54-38\DAD-OD(1-2)-80-20-0.5ML-
                  SUL-ALL-45MIN.M (Sequence Method)
Last changed    : 5/3/2019 5:44:15 PM
                  (modified after loading)
  
```

Additional Info : Peak(s) manually integrated

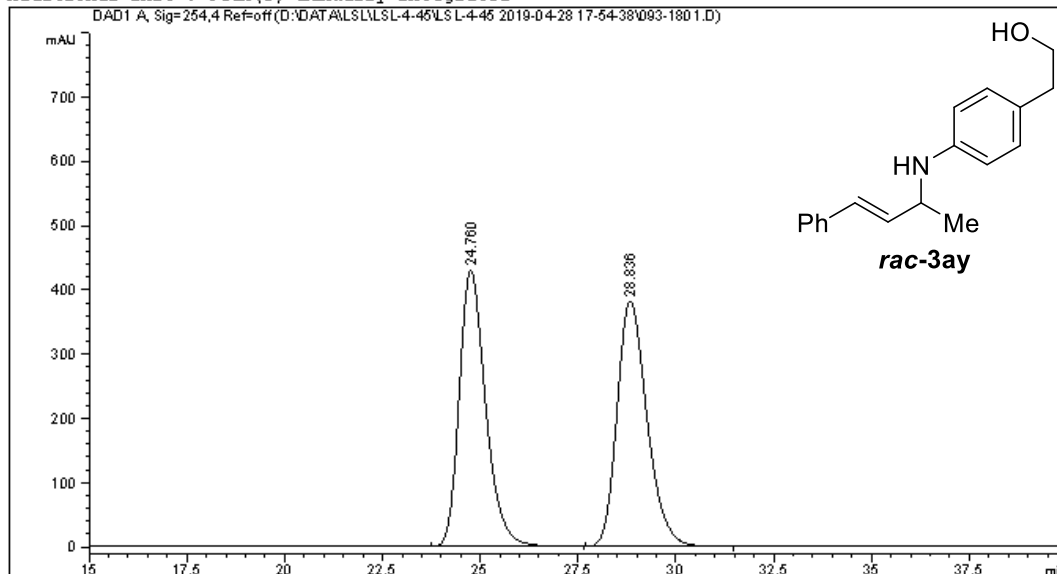

=====  
 Area Percent Report  
 =====

```

Sorted By      :      Signal
Multiplier     :      1.0000
Dilution      :      1.0000
Use Multiplier & Dilution Factor with ISTDs
  
```

Signal 1: DAD1 A, Sig=254,4 Ref=off

| Peak # | RetTime [min] | Type | Width [min] | Area [mAU*s] | Height [mAU] | Area %  |
|--------|---------------|------|-------------|--------------|--------------|---------|
| 1      | 24.760        | BB   | 0.7097      | 2.01640e4    | 429.50250    | 49.8858 |
| 2      | 28.836        | BB   | 0.8000      | 2.02563e4    | 381.19202    | 50.1142 |

Totals :                    4.04203e4    810.69452

**Figure S239.** HPLC spectra of *rac-3ay*, related to **Figure 5**.

Data File D:\DATA\LSL\LSL-4-45\LSL-4-45 2019-04-28 17-54-38\092-1701.D  
 Sample Name: LJ-148-4

```

=====
Acq. Operator   :                               Seq. Line :   17
Acq. Instrument : Instrument 2                 Location  : Vial 92
Injection Date  : 4/29/2019 3:40:21 AM        Inj       :    1
                                                Inj Volume: 5.000 µl

Acq. Method     : D:\DATA\LSL\LSL-4-45\LSL-4-45 2019-04-28 17-54-38\DAD-OD(1-2)-80-20-0.5ML-
SUL-ALL-45MIN.M
Last changed    : 4/28/2019 10:10:52 PM
Analysis Method : D:\DATA\LSL\LSL-4-45\LSL-4-45 2019-04-28 17-54-38\DAD-OD(1-2)-80-20-0.5ML-
SUL-ALL-45MIN.M (Sequence Method)
Last changed    : 5/3/2019 5:46:15 PM
                  (modified after loading)
  
```

Additional Info : Peak(s) manually integrated

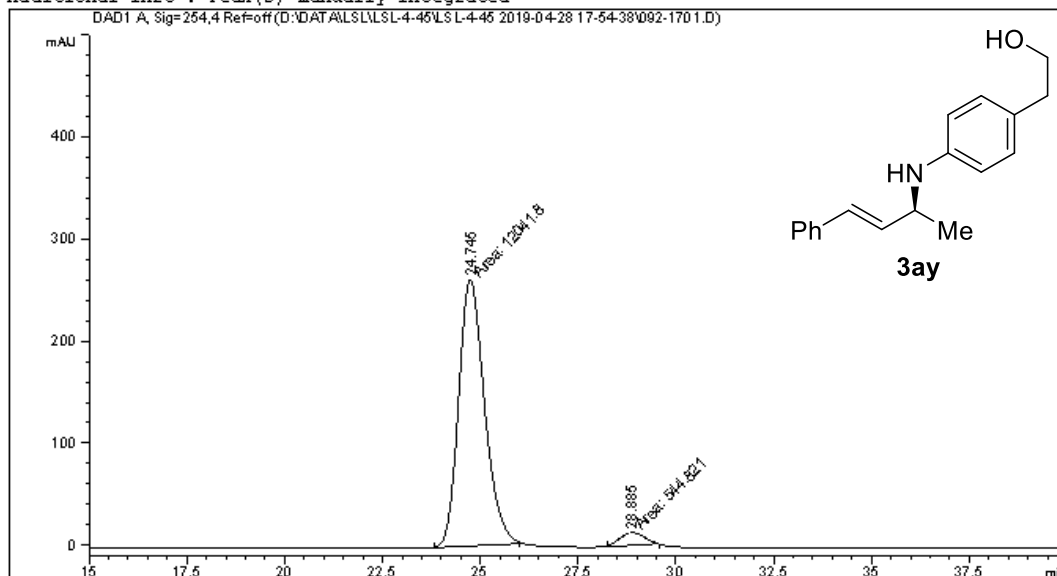

Area Percent Report

```

=====
Sorted By      :      Signal
Multiplier     :      1.0000
Dilution       :      1.0000
Use Multiplier & Dilution Factor with ISTDs
  
```

Signal 1: DAD1 A, Sig=254,4 Ref=off

| Peak # | RetTime [min] | Type | Width [min] | Area [mAU*s] | Height [mAU] | Area %  |
|--------|---------------|------|-------------|--------------|--------------|---------|
| 1      | 24.745        | MM   | 0.7688      | 1.20418e4    | 261.04971    | 95.6714 |
| 2      | 28.885        | MM   | 0.7354      | 544.82092    | 12.34704     | 4.3286  |

Totals : 1.25866e4 273.39676

Figure S240. HPLC spectra of 3ay, related to Figure 5.

Data File D:\DATA\GUAN YUQING\LJ-141\LJ-141 2019-05-05 15-18-34\062-0401.D  
 Sample Name: LJ-143-2

```

=====
Acq. Operator   :                               Seq. Line :    4
Acq. Instrument : Instrument 1                   Location  : Vial 62
Injection Date  : 5/5/2019 5:42:09 PM           Inj       :    1
                                                    Inj Volume: 5.000 µl
Acq. Method     : D:\DATA\GUAN YUQING\LJ-141\LJ-141 2019-05-05 15-18-34\VWD-AS(1-6)-99-1-0.
                  SML-5UL-254NM-80MIN.M
Last changed    : 5/5/2019 3:41:41 PM
                  (modified after loading)
Analysis Method : D:\METHOD\YANG JIAXIN\VWD-IA-(1-2)-85-15-1.0ML-5UL-210NM-60MIN.M
Last changed    : 5/31/2019 8:42:20 PM
                  (modified after loading)
  
```

Additional Info : Peak(s) manually integrated

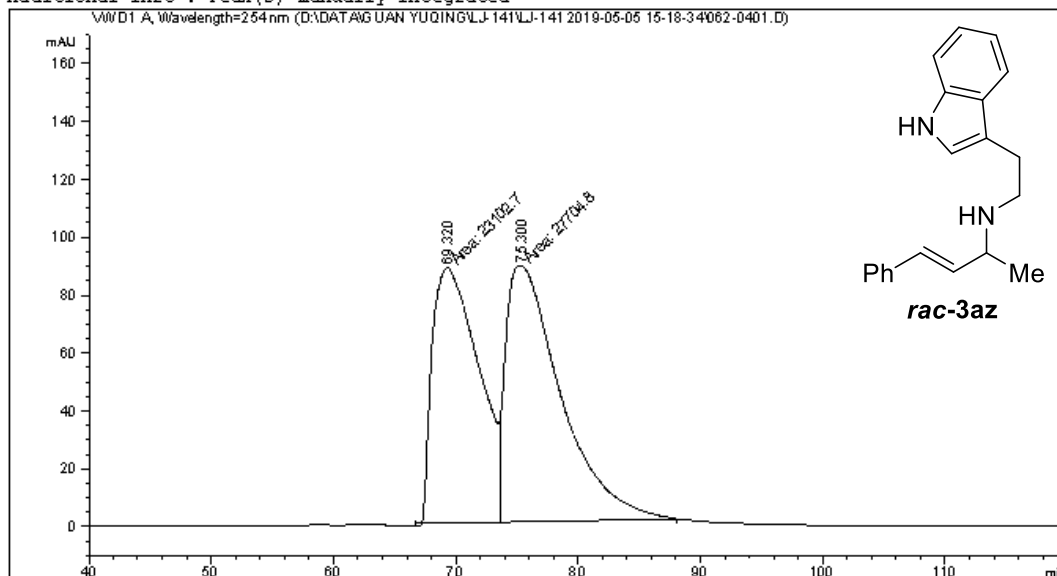

Area Percent Report

```

Sorted By      :      Signal
Multiplier     :      1.0000
Dilution       :      1.0000
Use Multiplier & Dilution Factor with ISTDs
  
```

Signal 1: WVD1 A, Wavelength=254 nm

| Peak # | RetTime [min] | Type | Width [min] | Area [mAU*s] | Height [mAU] | Area %  |
|--------|---------------|------|-------------|--------------|--------------|---------|
| 1      | 69.320        | MF   | 4.3691      | 2.31027e4    | 88.12956     | 45.4710 |
| 2      | 75.300        | FM   | 5.2276      | 2.77048e4    | 88.32815     | 54.5290 |

Totals :                    5.08076e4    176.45771

Figure S241. HPLC spectra of *rac-3az*, related to Figure 5.

Data File D:\DATA\GUAN YUQING\LJ-141\LJ-141 2019-05-05 15-18-34\061-0301.D  
Sample Name: LJ-141-2

```
=====
Acq. Operator   :                               Seq. Line :    3
Acq. Instrument : Instrument 1                  Location  : Vial 61
Injection Date  : 5/5/2019 3:41:19 PM          Inj       :    1
                                                Inj Volume: 5.000 µl
Acq. Method     : D:\DATA\GUAN YUQING\LJ-141\LJ-141 2019-05-05 15-18-34\VWD-AS(1-6)-99-1-0.
                                                SML-5UL-254NM-80MIN.M
Last changed    : 5/5/2019 3:41:41 PM
                                                (modified after loading)
Analysis Method : D:\DATA\GUAN YUQING\LJ-141\LJ-141 2019-05-05 15-18-34\VWD-AS(1-6)-99-1-0.
                                                SML-5UL-254NM-80MIN.M (Sequence Method)
Last changed    : 5/6/2019 10:41:26 AM
                                                (modified after loading)
Additional Info  : Peak(s) manually integrated
=====
```

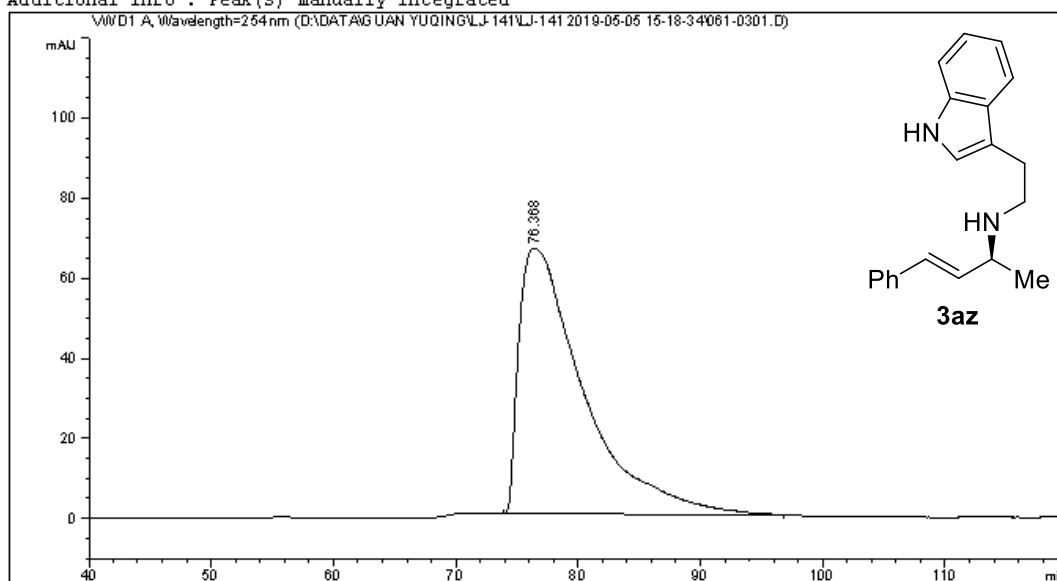

=====  
Area Percent Report  
=====

Sorted By : Signal  
Multiplier : 1.0000  
Dilution : 1.0000  
Use Multiplier & Dilution Factor with ISTDs

Signal 1: VWD1 A, Wavelength=254 nm

| Peak #   | RetTime [min] | Type | Width [min] | Area [mAU*s] | Height [mAU] | Area %   |
|----------|---------------|------|-------------|--------------|--------------|----------|
| 1        | 76.368        | BB   | 4.3045      | 2.42250e4    | 66.24274     | 100.0000 |
| Totals : |               |      |             | 2.42250e4    | 66.24274     |          |

Instrument 2 5/6/2019 10:41:37 AM

Page 1 of 2

Figure S242. HPLC spectra of 3az, related to Figure 5.

Data File D:\DATA\GUAN YUQING\LJ-148-7\LJ-148-7-AS 2019-05-31 11-42-32\082-0301.D  
Sample Name: LJ-148-7-RAC

```
=====
Acq. Operator   :                               Seq. Line :    3
Acq. Instrument : Instrument 1                  Location  : Vial 82
Injection Date  : 5/31/2019 12:55:10 PM        Inj       :    1
                                           Inj Volume: 5.000 µl

Acq. Method     : D:\DATA\GUAN YUQING\LJ-148-7\LJ-148-7-AS 2019-05-31 11-42-32\VWD-AS(1-6)-90
                  -10-0.5ML-SUL-254NM-60MIN.M
Last changed    : 5/30/2019 9:54:14 PM
Analysis Method : D:\METHOD\YANG JIAXIN\VWD-IA-(1-2)-85-15-1.0ML-SUL-210NM-60MIN.M
Last changed    : 5/31/2019 8:06:48 PM
                  (modified after loading)
Additional Info : Peak(s) manually integrated
=====
```

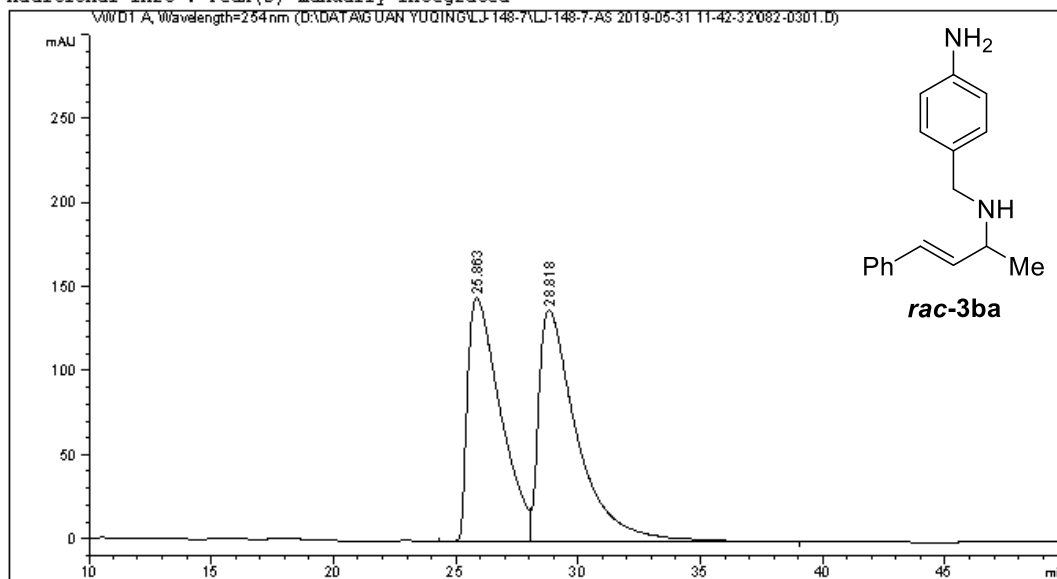

=====  
Area Percent Report  
=====

```
Sorted By      :      Signal
Multiplier     :      1.0000
Dilution       :      1.0000
Use Multiplier & Dilution Factor with ISTDs
```

Signal 1: VWD1 A, Wavelength=254 nm

| Peak # | RetTime [min] | Type | Width [min] | Area [mAU*s] | Height [mAU] | Area %  |
|--------|---------------|------|-------------|--------------|--------------|---------|
| 1      | 25.863        | BV   | 1.3984      | 1.34952e4    | 145.05293    | 47.2055 |
| 2      | 28.818        | VB   | 1.5954      | 1.50930e4    | 137.95860    | 52.7945 |

Totals :                                    2.85882e4    283.01154

Figure S243. HPLC spectra of *rac-3ba*, related to Figure 5.

Data File D:\DATA\GUAN YUQING\LJ-148-7\LJ-148-7-AS 2019-05-31 11-42-32\081-0201.D  
Sample Name: LJ-148-7

```
=====
Acq. Operator   :                               Seq. Line :    2
Acq. Instrument : Instrument 1                   Location  : Vial 81
Injection Date  : 5/31/2019 11:54:19 AM         Inj       :    1
                                                    Inj Volume: 5.000 µl
Acq. Method     : D:\DATA\GUAN YUQING\LJ-148-7\LJ-148-7-AS 2019-05-31 11-42-32\VWD-AS(1-6)-90
                  -10-0.5ML-5UL-254NM-60MIN.M
Last changed    : 5/30/2019 9:54:14 PM
Analysis Method : D:\METHOD\YANG JIAXIN\VWD-IA-(1-2)-85-15-1.0ML-5UL-210NM-60MIN.M
Last changed    : 5/31/2019 8:09:16 PM
                  (modified after loading)
Additional Info : Peak(s) manually integrated
=====
```

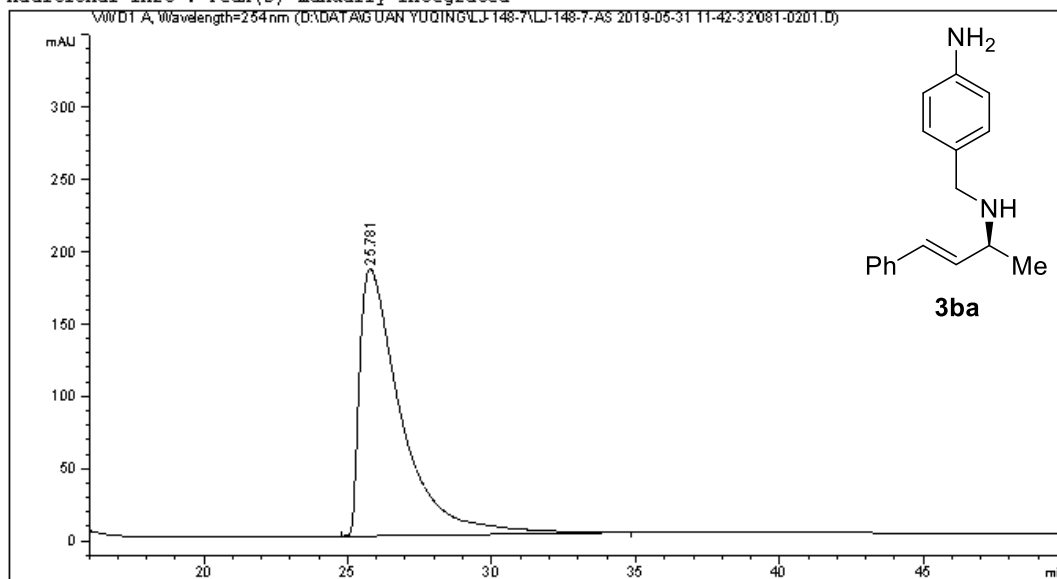

=====  
Area Percent Report  
=====

```
Sorted By      :      Signal
Multiplier     :      1.0000
Dilution       :      1.0000
Use Multiplier & Dilution Factor with ISTDs
```

Signal 1: VWD1 A, Wavelength=254 nm

| Peak # | RetTime [min] | Type | Width [min] | Area [mAU*s] | Height [mAU] | Area %   |
|--------|---------------|------|-------------|--------------|--------------|----------|
| 1      | 25.781        | BB   | 1.4723      | 1.84618e4    | 184.20869    | 100.0000 |

Totals :                    1.84618e4   184.20869

Figure S244. HPLC spectra of 3ba, related to Figure 5.

## Transparent Methods

### General Information

Unless otherwise noted, all reagents and solvents were purchased from commercial suppliers (Energy Chemical, Adamas-beta®, J&K and so on) and used without further purification. All reactions were performed under a dry argon atmosphere fitted on a glass tube or vial unless otherwise specified. All new compounds were characterized by  $^1\text{H}$  NMR,  $^{13}\text{C}$  NMR,  $^{19}\text{F}$  NMR and HRMS. The known compounds were characterized by  $^1\text{H}$  NMR,  $^{13}\text{C}$  NMR.  $^1\text{H}$ ,  $^{13}\text{C}$  and  $^{19}\text{F}$  NMR data were recorded with Bruker 400 MHz with TMS as the internal standard. Data are reported as follows: chemical shift, multiplicity (s = singlet, d = doublet, t = triplet, q = quartet, dd = doublet of doublet, dt = doublet of triplet, m = multiplet, br = broad), coupling constants and integration. All chemical shifts ( $\delta$ ) were reported in ppm and coupling constants ( $J$ ) in Hz. All chemical shifts were reported relative to TMS (0.00 ppm) for  $^1\text{H}$  NMR,  $\text{CDCl}_3$  (77.00 ppm) for  $^{13}\text{C}$  NMR, respectively. High resolution mass spectra (HRMS) were measured with a Waters Micromass GCT instrument. GC-MS spectra were recorded on a Varian GC-MS 3900 - 2100 T. GC analysis was performed on an Agilent 7890B gas chromatograph with an FID detector using a J & W DB-1 column (10 m, 0.1 mm I.D.). Optical rotation was determined using a Perkin Elmer 343 polarimeter. HPLC analysis was conducted on an Agilent 1260 Series instrument. Column Chromatography was performed with silica gel Merck 60 (300-400 mesh). Purification of the product amine were performed on deactivated silica gel. The deactivated silica gel was prepared by washing the silica gel with petroleum ether/triethylamine (20:1 v/v) prior to purification.

### General Procedures for the Synthesis of Conjugated Dienes

Dienes **1a-1i** were prepared from commercially available cinnamic acids or cinnamaldehydes, the following scheme shows general procedures (Preuß et al, 2013; Sardini & Brown, 2017):

**Scheme S1** (related to **Figure 4**):

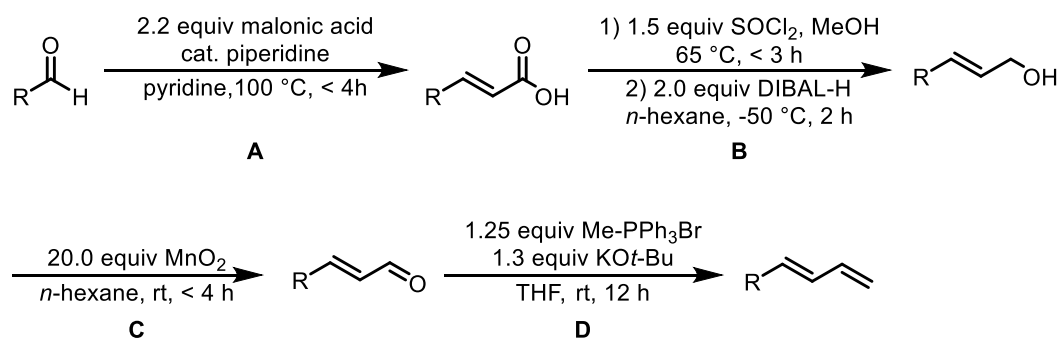

**Step A:** A mixture of aldehyde (125 mmol, 1.0 equiv) and malonic acid (28.7 g, 275 mmol, 2.2 equiv) was suspended in 65 mL pyridine. Piperidine (2.0 mL) was added and the mixture was



heated to 100 °C until no more gas formation was observed through a gas-washing bottle. The reaction mixture was then poured into ice-cold aqueous HCl solution (2 M, 500 mL) under continuous stirring. The pH-value was checked and adjusted with additional aqueous HCl solution to be strong acidic. The resulting suspension was filtered and the solid cinnamic acid was washed with aqueous HCl (2 M) until no basic reaction of the filtrate was observed. The cinnamic acid was obtained as a white solid which was dried under reduced pressure.

**Step B:** The cinnamic acid (50 mmol, 1.0 equiv) was suspended in 100 mL MeOH (2 mL *per* mmol acid) and SOCl<sub>2</sub> (5.4 mL, 75 mmol, 1.5 equiv) was added. The reaction mixture was heated to 65 °C for 2 h. Subsequently, the MeOH was removed under reduced pressure and the resulting solid was dissolved in dry *n*-hexane under an atmosphere of N<sub>2</sub>. The solution was cooled to -50 °C and a solution of DIBAL-H in *n*-hexane (1 M, 100 mL, 100 mmol, 2.0 equiv) was added slowly. After complete addition, the reaction mixture was stirred for 2.5 h at -50 °C. Then 10 mL MeOH and 50 mL aqueous NaHCO<sub>3</sub> solution were added slowly and the mixture was allowed to reach room temperature. The resulting slurry was carefully acidified with aqueous HCl (1 M) until all solid was dissolved. The layers were separated and the aqueous layer was extracted with *n*-hexane (3×100 mL). The combined organic layers were dried with Na<sub>2</sub>SO<sub>4</sub> and the solvents were removed under reduced pressure.

**Step C:** The resulting crude allylic alcohol was dissolved in 400 mL *n*-hexane. Then manganese dioxide (65.2 g, 750 mmol, 20.0 equiv) was added and the reaction mixture was stirred under an atmosphere of N<sub>2</sub>. The progress of the reaction was monitored by thin layer chromatography and after complete conversion, the reaction mixture was filtered through silica gel. The solid residue was washed with EtOAc and the solvent was removed under reduced pressure. Finally, the crude product was purified by flash column chromatography to give the corresponding cinnamaldehyde.

**Step D:** To a flame-dried round bottom flask was added phosphonium (1.25 equiv) and KO<sup>t</sup>Bu (1.3 equiv). The flask was evacuated and backfilled with N<sub>2</sub> three times. THF (0.25 M) was then added via syringe. The solution was allowed to stir at ambient temperature for 30 min before adding aldehyde (1.0 equiv) dropwise over 10 minutes. The reaction was then allowed to stir at room temperature for 12 h. The reaction was then quenched with 100 mL saturated NH<sub>4</sub>Cl solution, and the aqueous layer was extracted with diethyl ether (3×100 mL). The combined organic extracts were washed with brine (1×100 mL), dried over Na<sub>2</sub>SO<sub>4</sub>, and gravity filtered. The solvent was removed under reduced pressure, and the crude product was purified via silica gel column chromatography to give the desired diene.

**(E)-buta-1,3-dien-1-ylbenzene (1a)** (Preuß et al, 2013): colorless liquid, 88% yield, step D. <sup>1</sup>H

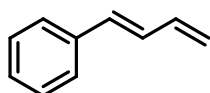

NMR (400 MHz, CDCl<sub>3</sub>) δ 7.42-7.39 (m, 2H), 7.34-7.29 (m, 2H), 7.25-7.20 (m, 1H), 6.82-6.75 (m, 1H), 6.58-6.46 (m, 2H), 5.36-5.31 (m, 1H), 5.19-5.16

(m, 1H) ppm;  $^{13}\text{C}$  NMR (100 MHz,  $\text{CDCl}_3$ )  $\delta$  137.2, 137.1, 132.8, 129.6, 128.6, 127.6, 126.4, 117.6 ppm.

**(E)-1-(buta-1,3-dien-1-yl)-2-methoxybenzene (1b)** (Davenport & Fernandez, 2018): colorless

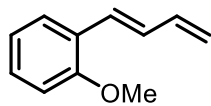

liquid, 80% yield, step D.  $^1\text{H}$  NMR (400 MHz,  $\text{CDCl}_3$ )  $\delta$  7.47 (dd,  $J = 7.7$ , 1.7 Hz, 1H), 7.24-7.19 (m, 1H), 6.94-6.77 (m, 4H), 6.54 (dt,  $J = 16.9$ , 10.1 Hz, 1H), 5.33-5.28 (m, 1H), 5.15-5.12 (m, 1H), 3.85 (s, 3H) ppm;  $^{13}\text{C}$  NMR (100 MHz,  $\text{CDCl}_3$ )  $\delta$  156.7, 137.9, 130.2, 128.6, 127.6, 126.4, 126.0, 120.6, 117.0, 110.8, 55.4 ppm.

**(E)-1-(buta-1,3-dien-1-yl)-3-methoxybenzene (1c)** (Preuß et al, 2013): colorless solid, 41%

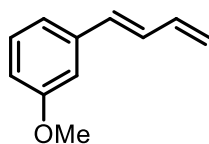

yield, steps A-D.  $^1\text{H}$  NMR (400 MHz,  $\text{CDCl}_3$ )  $\delta$  7.25-7.21 (m, 1H), 7.01-6.99 (m, 1H), 6.94 (dd,  $J = 2.6$ , 1.6 Hz, 1H), 6.81-6.74 (m, 2H), 6.56-6.45 (m, 2H), 5.36-5.31 (m, 1H), 5.19-5.16 (m, 1H), 3.82 (s, 3H) ppm;  $^{13}\text{C}$  NMR (100 MHz,  $\text{CDCl}_3$ )  $\delta$  159.8, 138.6, 137.1, 132.7, 129.9, 129.5, 119.2, 117.8, 113.4, 111.6, 55.19 ppm.

**(E)-1-(buta-1,3-dien-1-yl)-4-methoxybenzene (1d)** (Preuß et al, 2013): colorless solid, 85%

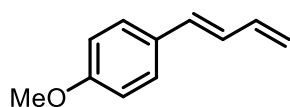

yield, step D.  $^1\text{H}$  NMR (400 MHz,  $\text{CDCl}_3$ )  $\delta$  7.36-7.33 (m, 2H), 6.88-6.84 (m, 2H), 6.70-6.64 (m, 1H), 6.53-6.44 (m, 2H), 5.28 (d,  $J = 16.0$  Hz, 1H), 5.11 (d,  $J = 8.5$  Hz, 1H), 3.81 (s, 3H) ppm;  $^{13}\text{C}$  NMR (100 MHz,  $\text{CDCl}_3$ )  $\delta$  159.2, 137.3, 132.4, 129.9, 127.6, 116.5, 114.0, 55.3 ppm.

**(E)-1-(buta-1,3-dien-1-yl)-4-fluorobenzene (1e)** (Hu et al, 2018): colorless liquid, 90% yield,

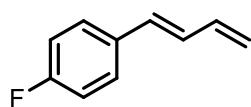

step D.  $^1\text{H}$  NMR (400 MHz,  $\text{CDCl}_3$ )  $\delta$  7.37-7.34 (m, 2H), 7.03-6.97 (m, 2H), 6.73-6.66 (m, 1H), 6.53-6.43 (m, 2H), 5.32 (d,  $J = 15.6$  Hz, 1H), 5.17 (d,  $J = 9.2$  Hz, 1H) ppm;  $^{13}\text{C}$  NMR (100 MHz,  $\text{CDCl}_3$ )  $\delta$  162.3 (d,  $J = 247.2$  Hz), 136.9, 133.2 (d,  $J = 3.4$  Hz), 131.5, 129.3 (d,  $J = 2.4$  Hz), 127.9 (d,  $J = 8.0$  Hz), 117.7, 115.5 (d,  $J = 21.7$  Hz) ppm;  $^{19}\text{F}$  NMR (376 MHz,  $\text{CDCl}_3$ )  $\delta$  -114.18 ppm.

**(E)-1-(buta-1,3-dien-1-yl)-4-(trifluoromethyl)benzene (1f)** (Adamson & Malcolmson, 2017):

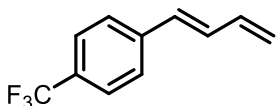

colorless liquid, 28% overall yield, steps B-D.  $^1\text{H}$  NMR (400 MHz,  $\text{CDCl}_3$ )  $\delta$  7.57-7.55 (m, 2H), 7.49-7.47 (m, 2H), 6.85 (dd,  $J = 15.7$ , 10.5 Hz, 1H), 6.59-6.47 (m, 2H), 5.43-5.38 (m, 1H), 5.28-5.25 (m, 1H) ppm;  $^{13}\text{C}$  NMR (100 MHz,  $\text{CDCl}_3$ )  $\delta$  140.5 (q,  $J = 1.4$  Hz), 136.6, 131.9, 131.2, 129.2 (q,  $J = 32.4$  Hz), 126.5, 125.5 (q,  $J = 3.9$  Hz), 124.2 (q,  $J = 271.5$  Hz), 119.4 ppm;  $^{19}\text{F}$  NMR (376 MHz,  $\text{CDCl}_3$ )  $\delta$  -62.40 ppm.

**(E)-4-(buta-1,3-dien-1-yl)-N,N-dimethylaniline (1g)** (Davenport & Fernandez, 2018): yellow solid, 37% yield, step D. <sup>1</sup>H NMR (400 MHz, CDCl<sub>3</sub>) δ 7.31-7.29 (m, 2H), 6.69-6.67 (m, 2H), 6.63 (dd, *J* = 15.7, 10.4 Hz, 1H), 6.53-6.44 (m, 2H), 5.25-5.20 (m, 1H), 5.04 (d, *J* = 9.8 Hz, 1H), 2.96 (s, 6H) ppm; <sup>13</sup>C NMR (100 MHz, CDCl<sub>3</sub>) δ 150.0, 137.8, 133.1, 127.5, 125.6, 115.0, 112.4, 40.5 ppm.

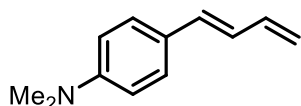

**(E)-2-(buta-1,3-dien-1-yl)furan (1h)** (Preuß et al, 2013): slight yellow liquid, 75% yield, step D. <sup>1</sup>H NMR (400 MHz, CDCl<sub>3</sub>) δ 7.36 (d, *J* = 1.9 Hz, 1H), 6.73-6.67 (m, 1H), 6.48-6.41 (m, 1H), 6.39-6.34 (m, 2H), 6.27 (d, *J* = 3.2 Hz, 1H), 5.35-5.30 (m, 1H), 5.17-5.14 (m, 1H) ppm; <sup>13</sup>C NMR (100 MHz, CDCl<sub>3</sub>) δ 152.9, 142.2, 136.7, 128.2, 120.4, 117.8, 111.6, 108.5 ppm.

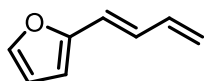

**(E)-buta-1,3-dien-1-ylcyclohexane (1i)** (Preuß et al, 2013): colorless liquid, 32% overall yield, steps A-D. <sup>1</sup>H NMR (400 MHz, CDCl<sub>3</sub>) δ 6.35-6.25 (m, 1H), 6.05-5.98 (m, 1H), 5.66 (dd, *J* = 15.3, 6.9 Hz, 1H), 5.12-5.07 (m, 1H), 4.97-4.94 (m, 1H), 2.04-1.95 (m, 1H), 1.75-1.70 (m, 4H), 1.67-1.62 (m, 1H), 1.33-1.03 (m, 5H) ppm; <sup>13</sup>C NMR (100 MHz, CDCl<sub>3</sub>) δ 141.3, 137.6, 128.3, 114.7, 40.6, 32.7, 26.1, 26.0 ppm.

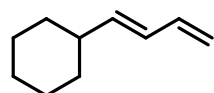

**Scheme S2** (related to **Figure 4**):

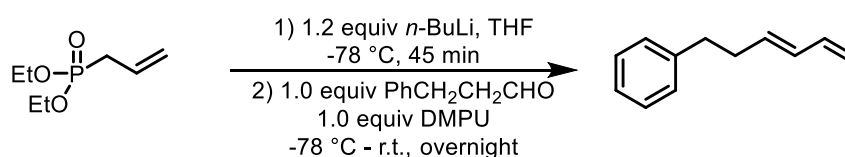

**Synthesis of (E)-hexa-3,5-dien-1-ylbenzene (1j)** (Adamson & Malcolmson, 2017): To a solution of diethyl allylphosphonate (4.28 g, 24 mmol, 1.2 equiv) in anhydrous THF (45 mL) was added dropwise *n*BuLi (2.5 M in hexanes, 9.6 mL, 24 mmol, 1.2 equiv) at -78 °C. After stirring for 45 min, a solution of phenylpropyl aldehyde (2.6 mL, 20 mmol, 1.0 equiv) in DMPU (2.4 mL, 20 mmol, 1.0 equiv) was added dropwise via cannula. The resulting solution was stirred for 2 h at -78 °C, and then allowed to warm to room temperature. Stirring was continued overnight at room temperature before quenching with saturated aqueous NH<sub>4</sub>Cl solution. The mixture was extracted with diethyl ether (3×45 mL). The combined organic phases were washed with brine (100 mL), dried (Na<sub>2</sub>SO<sub>4</sub>) and concentrated to afford the crude product. Purification by flash chromatography (PE as eluent) gave the desired diene **1j** (1.23 g, 39% yield) as a colorless oil. <sup>1</sup>H NMR (400 MHz, CDCl<sub>3</sub>) δ 7.30-7.26 (m, 2H), 7.20-7.17 (m, 3H), 6.35-6.26 (m, 1H), 6.12-6.05 (m, 1H), 5.78-5.71 (m, 1H), 5.12-5.07 (m, 1H), 4.99-4.96 (m, 1H), 2.73-2.69 (m, 2H), 2.44-2.38 (m, 2H) ppm; <sup>13</sup>C NMR (100 MHz, CDCl<sub>3</sub>) δ 141.7, 137.1, 134.2, 131.4, 128.4, 128.3, 125.8, 115.2, 35.6, 34.4 ppm.

**Reaction Optimization**

A reaction vial was charged with Ni(COD)<sub>2</sub> (2.8 mg, 0.01 mmol, 0.05 equiv vs amine), ligand (0.01 mmol, 0.05 equiv vs amine), morpholine (17  $\mu$ L, 0.2 mmol, 1.0 equiv), 1-phenylbutadiene (40  $\mu$ L, 0.3 mmol, 1.5 equiv), and 1.0 mL of solvent (toluene, THF, MTBE, EA, *n*-hexane, *i*-PrOH, CH<sub>3</sub>CN or PhCN) in an argon-filled glovebox, then acid (0.00-0.20 equiv vs amine) was added. The reaction vessel was sealed using a PTFE septum and removed from the glovebox, and the mixture was stirred at 25 °C for 24 h. Yields were determined by gas chromatogram analysis, using naphthalene as the internal standard. The ee values were determined by HPLC on a chiral stationary phase.

**Table S1.** Solvent screening for the Ni-catalyzed asymmetric hydroamination of **1a**, related to **Figure 2**.<sup>[a]</sup>

| Entry | Solvent            | Yield [%] <sup>[b]</sup> | ee [%] <sup>[c]</sup> |
|-------|--------------------|--------------------------|-----------------------|
| 1     | <i>i</i> -PrOH     | trace                    | ND <sup>[d]</sup>     |
| 2     | PhMe               | 90                       | 23                    |
| 3     | THF                | 42                       | 9                     |
| 4     | MTBE               | trace                    | ND                    |
| 5     | EtOAc              | trace                    | ND                    |
| 6     | CH <sub>3</sub> CN | trace                    | ND                    |
| 7     | PhCN               | 53                       | 14                    |
| 8     | <i>n</i> -hexane   | NP <sup>[e]</sup>        | ND                    |

[a] Unless otherwise noted, all reactions were carried out with 0.10 mmol amine, 0.15 mmol diene, 5.0 mol % Ni(COD)<sub>2</sub>, 5.0 mol % (S,S)-BDPP, 5.0 mol % TsOH·H<sub>2</sub>O in 1 mL solvent at 25 °C for 24 h. [b] Yield was determined by gas chromatogram analysis, using naphthalene as the internal standard. [c] Determined by HPLC analysis using a chiral stationary phase. [d] Not determined. [e] No product.

**Table S2.** Ligand screening for Ni-catalyzed asymmetric hydroamination of **1a**, related to **Figure 2**.<sup>[a]</sup>

| Entry | Ligand    | Yield [%] <sup>[b]</sup> | ee [%] <sup>[c]</sup> |
|-------|-----------|--------------------------|-----------------------|
| 1     | <b>L1</b> | 65                       | 30                    |
| 2     | <b>L2</b> | 42                       | 21                    |

|                  |           |                   |                   |
|------------------|-----------|-------------------|-------------------|
| 3                | <b>L3</b> | trace             | ND <sup>[d]</sup> |
| 4                | <b>L4</b> | trace             | ND                |
| 5                | <b>L5</b> | 24                | 12                |
| 6                | <b>L6</b> | 90                | 23                |
| 7                | <b>L7</b> | 86                | 84                |
| 8                | <b>L8</b> | 30                | 98                |
| 9 <sup>[e]</sup> | <b>L8</b> | 69 <sup>[f]</sup> | 98                |

[a] Unless otherwise noted, all reactions were carried out with 0.10 mmol amine, 0.15 mmol diene, 5.0 mol % Ni(COD)<sub>2</sub>, 5.0 mol % ligand, 5.0 mol % TsOH·H<sub>2</sub>O in 1 mL toluene at 25 °C for 24 h. [b] Yield was determined by gas chromatogram analysis, using naphthalene as the internal standard. [c] Determined by HPLC analysis using a chiral stationary phase. [d] Not determined. [e] The catalyst was stirred at room temperature one hour in advance. [f] Isolated yield.

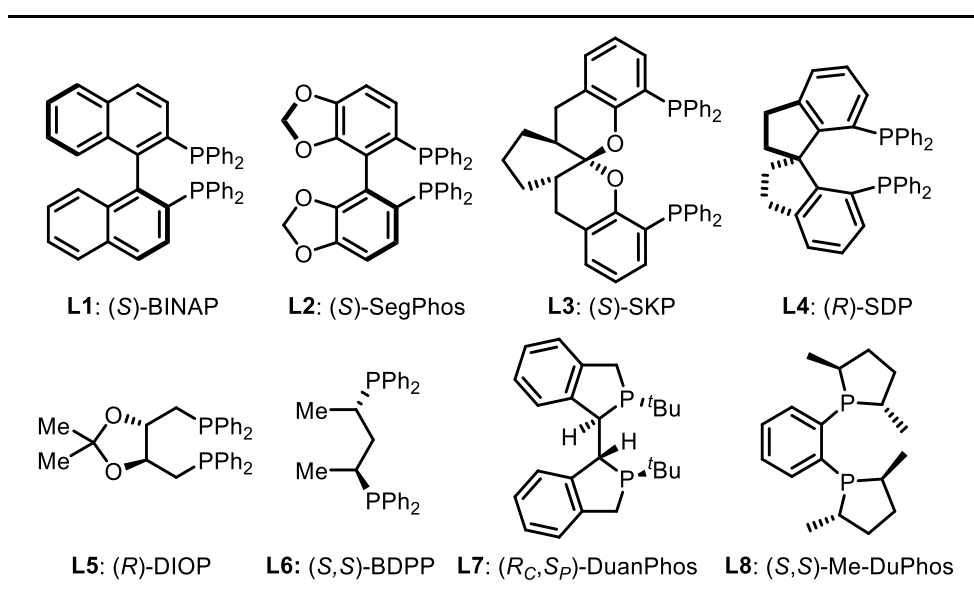

**Table S3.** Acid additives screening for Ni-catalyzed asymmetric hydroamination of **1a**, related to **Figure 2**.<sup>[a]</sup>

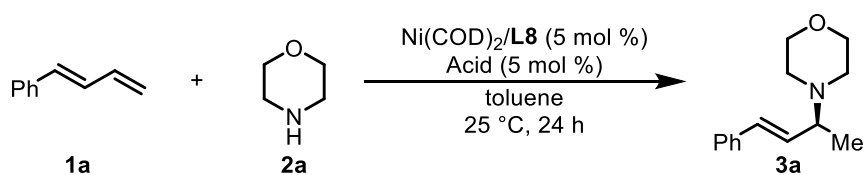

| Entry | Acid      | Yield[%] <sup>[b]</sup> | ee[%] <sup>[c]</sup> |
|-------|-----------|-------------------------|----------------------|
| 1     | <b>A1</b> | 86                      | 86                   |
| 2     | <b>A2</b> | 86                      | 98                   |
| 3     | <b>A3</b> | 98                      | 98                   |
| 4     | <b>A4</b> | 94 <sup>[d]</sup>       | 96                   |

|                   |           |    |    |
|-------------------|-----------|----|----|
| 5                 | <b>A5</b> | 85 | 95 |
| 6                 | <b>A6</b> | 89 | 96 |
| 7                 | <b>A7</b> | 72 | 90 |
| 8                 | <b>A8</b> | 83 | 93 |
| 9 <sup>[e]</sup>  | <b>A3</b> | 99 | 98 |
| 10 <sup>[e]</sup> | <b>A4</b> | 99 | 96 |

[a] Unless otherwise noted, all reactions were carried out with 0.20 mmol diene, 0.40 mmol amine, 5.0 mol % Ni(COD)<sub>2</sub>/(S,S)-Me-DuPhos, 5.0 mol % acid in 1 mL toluene at 25 °C for 24 h; The catalyst was stirred at room temperature one hour in advance. [b] Yield was determined by gas chromatogram analysis, using naphthalene as the internal standard. [c] Determined by HPLC analysis using a chiral stationary phase. [d] Isolated yield. [e] With 0.30 mmol amine.

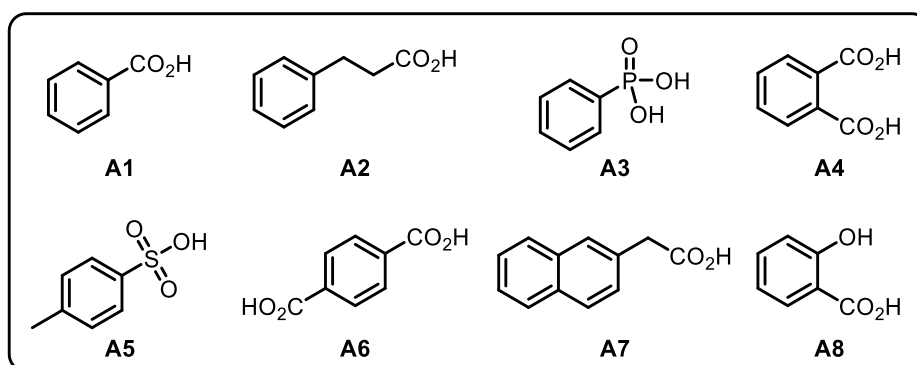

### General Procedure for Ni-catalyzed Asymmetric Hydroamination of Conjugated Dienes

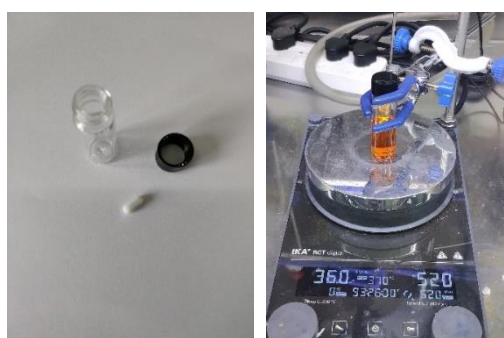

**catalyst solution**

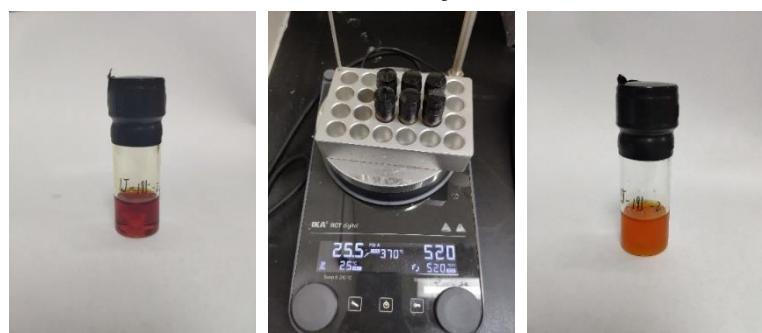

**before reaction**

**after reaction**

**Scheme S3** (related to **Figure 3**, **Figure 4** and **Figure 5**):

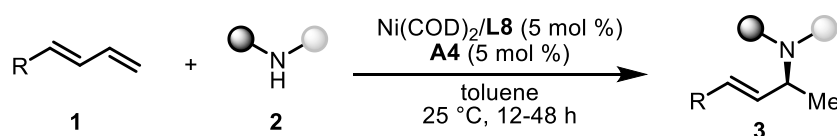

A stock solution was made by mixing  $\text{Ni}(\text{COD})_2$  with **L8** in a 1:1 molar ratio in toluene (0.01 M) at room temperature for 1 h in a argon-filled glovebox. An aliquot of the catalyst solution (1.0 mL, 0.01 mmol) was transferred by syringe into the vials charged with different 1,3-dienes (0.2 mmol for each) and amines (0.3 mmol for each), and then 0.01 mmol **A4** was added. The reaction vessel was sealed using a PTFE septum and removed from the glovebox, and the mixture was stirred at 25 °C for 12-48 h. The product was purified by column chromatography on deactivated silica gel using PE/EtOAc. The ee values of all compounds **3** were determined by HPLC on a chiral stationary phase.

**(S,E)-4-(4-phenylbut-3-en-2-yl)morpholine (3a)**: with **A3**, 12 h, obtained pale yellow oil 43.4

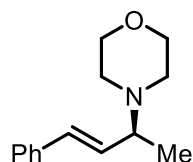

mg; Isolated yield: 99%; 98% ee;  $[\alpha]_D^{25} = -72.0$  ( $c = 1.0$ ,  $\text{CHCl}_3$ ); The enantiomeric excess was determined by HPLC on Chiralpak OD-H column, hexane: isopropanol = 90:10, flow rate = 0.5 mL/min, UV detection at 254 nm,  $t_R = 11.4$  min (minor), 14.4 min (major);  **$^1\text{H NMR}$**  (400 MHz,  $\text{CDCl}_3$ )  $\delta$  7.39-7.36 (m, 2H), 7.33-7.29 (m, 2H), 7.25-7.21 (m, 1H), 6.47 (d,  $J = 15.9$  Hz, 1H), 6.17 (dd,  $J = 15.9, 8.2$  Hz, 1H), 3.73 (t,  $J = 4.7$  Hz, 4H), 3.05-2.99 (m, 1H), 2.61-2.52 (m, 4H), 1.26 (d,  $J = 6.6$  Hz, 3H) ppm;  **$^{13}\text{C NMR}$**  (100 MHz,  $\text{CDCl}_3$ )  $\delta$  136.8, 132.0, 131.2, 128.6, 127.5, 126.2, 67.2, 63.1, 50.8, 17.8 ppm; **HRMS (ESI)** calculated  $[\text{M}+\text{Na}]^+$  for  $\text{C}_{14}\text{H}_{19}\text{NNaO} = 240.1359$ , found: 240.1359.

**(S,E)-N-butyl-4-phenylbut-3-en-2-amine (3b)**: with **A4**, 24 h, obtained colorless oil 37.7 mg;

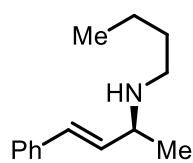

Isolated yield: 93%; > 99% ee;  $[\alpha]_D^{25} = -60.3$  ( $c = 1.0$ ,  $\text{CHCl}_3$ ); The enantiomeric excess was determined by HPLC on Chiralpak AD-H column, hexane: isopropanol = 99:1, flow rate = 0.6 mL/min, UV detection at 254 nm,  $t_R = 9.2$  min (major), 9.7 min (minor);  **$^1\text{H NMR}$**  (400 MHz,  $\text{CDCl}_3$ )  $\delta$  7.39-7.36 (m, 2H), 7.33-7.29 (m, 2H), 7.24-7.19 (m, 1H), 6.46 (d,  $J = 15.9$  Hz, 1H), 6.08 (dd,  $J = 15.9, 8.0$  Hz, 1H), 3.39-3.32 (m, 1H), 2.67-2.53 (m, 2H), 1.52-1.43 (m, 2H), 1.38-1.29 (m, 2H), 1.25 (d,  $J = 6.5$  Hz, 3H), 0.91 (t,  $J = 7.3$  Hz, 3H) ppm;  **$^{13}\text{C NMR}$**  (100 MHz,  $\text{CDCl}_3$ )  $\delta$  137.1, 134.4, 129.7, 128.5, 127.2, 126.2, 56.4, 47.3, 32.4, 22.0, 20.5, 14.0 ppm; **HRMS (ESI)** calculated  $[\text{M}+\text{Na}]^+$  for  $\text{C}_{14}\text{H}_{21}\text{NNa} = 226.1566$ , found: 226.1565.

**(S,E)-N-phenethyl-4-phenylbut-3-en-2-amine (3c):** with **A4**, 24 h, obtained pale yellow oil

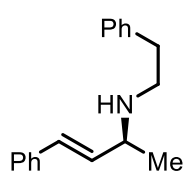

50.3 mg; Isolated yield: 99%; 92% ee;  $[\alpha]_D^{25} = -76.8$  ( $c = 1.0$ ,  $\text{CHCl}_3$ ); The enantiomeric excess was determined by HPLC on Chiralpak AD-H column, hexane: isopropanol = 99:1, flow rate = 0.6 mL/min, UV detection at 254 nm,  $t_R = 13.9$  min (major), 15.0 min (minor);  **$^1\text{H NMR}$**  (400 MHz,  $\text{CDCl}_3$ )  $\delta$  7.37-7.34 (m, 2H), 7.32-7.26 (m, 4H), 7.23-7.18 (m, 4H), 6.44 (d,  $J = 15.9$  Hz, 1H), 6.05 (dd,  $J = 15.9$ , 8.0 Hz, 1H), 3.41-3.34 (m, 1H), 2.96-2.79 (m, 4H), 1.23 (d,  $J = 6.5$  Hz, 3H) ppm;  **$^{13}\text{C NMR}$**  (100 MHz,  $\text{CDCl}_3$ )  $\delta$  139.9, 136.9, 133.9, 129.9, 128.7, 128.5, 128.4, 127.3, 126.2, 126.1, 56.2, 48.8, 36.4, 21.9 ppm; **HRMS (ESI)** calculated  $[\text{M}+\text{Na}]^+$  for  $\text{C}_{18}\text{H}_{21}\text{NNa} = 274.1566$ , found: 274.1563.

**(S,E)-N-(4-phenylbut-3-en-2-yl)cyclopropanamine (3d):** with **A4**, 24 h, obtained colorless oil

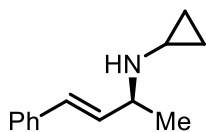

22.9 mg; Isolated yield: 61%; > 99% ee;  $[\alpha]_D^{25} = -91.8$  ( $c = 1.0$ ,  $\text{CHCl}_3$ ); The enantiomeric excess was determined by HPLC on Chiralpak OJ-H column, hexane: isopropanol = 95:5, flow rate = 0.5 mL/min, UV detection at 254 nm,  $t_R = 10.5$  min (major), 10.9 min (minor);  **$^1\text{H NMR}$**  (400 MHz,  $\text{CDCl}_3$ )  $\delta$  7.39-7.37 (m, 2H), 7.33-7.29 (m, 2H), 7.24-7.20 (m, 1H), 6.49 (d,  $J = 15.9$  Hz, 1H), 6.12 (dd,  $J = 15.9$ , 7.9 Hz, 1H), 3.52-3.45 (m,  $J = 6.7$  Hz, 1H), 2.18-2.13 (m, 1H), 2.02 (br, s 1H), 1.25 (d,  $J = 6.5$  Hz, 3H), 0.47-0.33 (m, 4H) ppm;  **$^{13}\text{C NMR}$**  (100 MHz,  $\text{CDCl}_3$ )  $\delta$  137.2, 134.4, 129.4, 128.5, 127.2, 126.2, 56.5, 28.6, 21.8, 6.6, 6.4 ppm; **HRMS (ESI)** calculated  $[\text{M}+\text{Na}]^+$  for  $\text{C}_{13}\text{H}_{17}\text{NNa} = 210.1253$ , found: 210.1254.

**(S,E)-N-(4-phenylbut-3-en-2-yl)cyclohexanamine (3e):** with **A4**, 24 h, obtained pale yellow

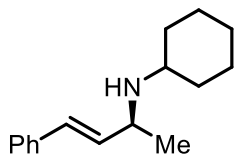

oil 34.9 mg; Isolated yield: 76%; 92% ee;  $[\alpha]_D^{25} = -66.1$  ( $c = 1.0$ ,  $\text{CHCl}_3$ ); The enantiomeric excess was determined by HPLC on Chiralpak AD-H column, hexane: isopropanol = 99:1, flow rate = 0.5 mL/min, UV detection at 254 nm,  $t_R = 11.0$  min (major), 12.1 min (minor);  **$^1\text{H NMR}$**  (400 MHz,  $\text{CDCl}_3$ )  $\delta$  7.49-7.37 (m, 2H), 7.33-7.29 (m, 2H), 7.24-7.20 (m, 1H), 6.44 (d,  $J = 15.9$  Hz, 1H), 6.07 (dd,  $J = 15.9$ , 8.1 Hz, 1H), 3.59-3.52 (m, 1H), 2.55-2.48 (m, 1H), 2.01-1.97 (m, 1H), 1.84-1.58 (m, 3H), 1.69 (br, s, 1H), 1.26-0.98 (m, 9H) ppm;  **$^{13}\text{C NMR}$**  (100 MHz,  $\text{CDCl}_3$ )  $\delta$  137.1, 134.8, 129.3, 128.5, 127.2, 126.2, 53.5, 52.5, 34.4, 33.2, 26.1, 25.3, 25.0, 22.5 ppm. **HRMS (ESI)** calculated  $[\text{M}+\text{Na}]^+$  for  $\text{C}_{16}\text{H}_{23}\text{NNa} = 252.1723$ , found: 252.1722.

**(S,E)-N-(furan-2-ylmethyl)-4-phenylbut-3-en-2-amine (3f):** with **A4**, 24 h, obtained pale

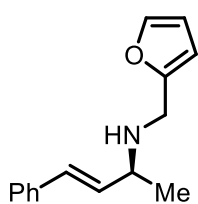

yellow oil 45.5 mg; Isolated yield: 99%; 99% ee;  $[\alpha]_D^{25} = -49.2$  ( $c = 1.0$ ,  $\text{CHCl}_3$ ); The enantiomeric excess was determined by HPLC on Chiralpak OD-H column, hexane: isopropanol = 99:1, flow rate = 0.5 mL/min, UV detection at 254 nm,  $t_R = 17.0$  min (minor), 20.0 min (major);  **$^1\text{H NMR}$**  (400 MHz,  $\text{CDCl}_3$ )  $\delta$  7.40-7.36 (m, 3H), 7.33-7.30 (m, 2H), 7.25-7.21 (m, 1H), 6.49 (d,  $J = 15.9$  Hz, 1H), 6.31 (dd,  $J = 3.1$ , 1.9 Hz, 1H), 6.16 (dd,  $J = 3.1$ , 0.5 Hz, 1H), 6.07 (dd,  $J = 15.9$ , 8.1 Hz, 1H), 3.83 (d,  $J = 14.4$  Hz, 1H), 3.73 (d,  $J = 14.4$  Hz, 1H), 3.42-3.35 (m, 1H),



1.26 (d,  $J = 6.4$  Hz, 3H) ppm;  $^{13}\text{C NMR}$  (100 MHz,  $\text{CDCl}_3$ )  $\delta$  153.9, 141.8, 137.0, 133.7, 130.5, 128.5, 127.4, 126.3, 110.1, 106.8, 55.3, 43.8, 22.0 ppm; **HRMS (ESI)** calculated  $[\text{M}+\text{H}]^+$  for  $\text{C}_{15}\text{H}_{18}\text{NO} = 228.1383$ , found: 228.1380.

**(S,E)-N-(2-(cyclohex-1-en-1-yl)ethyl)-4-phenylbut-3-en-2-amine (3g)**: with **A4**, 24 h,

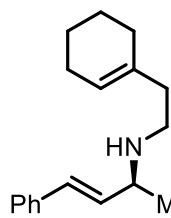

obtained pale yellow oil 50.9 mg; Isolated yield: 99%; 96% ee;  $[\alpha]_{\text{D}}^{25} = -66.1$  ( $c = 1.0$ ,  $\text{CHCl}_3$ ); The enantiomeric excess was determined by HPLC on Chiralpak AD-H column, hexane: isopropanol = 95:5, flow rate = 0.5 mL/min, UV detection at 254 nm,  $t_{\text{R}} = 11.0$  min (minor), 11.6 min (major);  $^1\text{H NMR}$  (400 MHz,  $\text{CDCl}_3$ )  $\delta$  7.39-7.36 (m, 2H), 7.33-7.29 (m, 2H), 7.24-7.20 (m, 1H), 6.46 (d,  $J = 15.9$  Hz, 1H), 6.07 (dd,  $J = 15.9, 8.0$  Hz, 1H), 5.48-5.45 (m, 1H), 3.38-3.31 (m, 1H), 2.74-2.59 (m, 2H), 2.14 (t,  $J = 6.9$  Hz, 2H), 2.01-1.97 (m, 2H), 1.92-1.88 (m, 2H), 1.64-1.51 (m, 4H), 1.46 (br, s, 1H), 1.24 (d,  $J = 6.5$  Hz, 3H) ppm;  $^{13}\text{C NMR}$  (100 MHz,  $\text{CDCl}_3$ )  $\delta$  137.1, 135.4, 134.4, 129.7, 128.5, 127.2, 126.2, 122.8, 56.2, 45.2, 38.4, 28.1, 25.2, 22.9, 22.4, 22.1 ppm; **HRMS (ESI)** calculated  $[\text{M}+\text{H}]^+$  for  $\text{C}_{18}\text{H}_{26}\text{N} = 256.2060$ , found: 256.2057.

**(S,E)-N-allyl-4-phenylbut-3-en-2-amine (3h)**: with **A4**, 24 h, obtained pale yellow oil 29.1 mg;

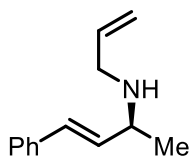

Isolated yield: 78%; > 99% ee;  $[\alpha]_{\text{D}}^{25} = -60.4$  ( $c = 1.0$ ,  $\text{CHCl}_3$ ); The enantiomeric excess was determined by HPLC on Chiralpak OJ-H column, hexane: isopropanol = 99:1, flow rate = 0.5 mL/min, UV detection at 254 nm,  $t_{\text{R}} = 11.9$  min (major), 12.7 min (minor);  $^1\text{H NMR}$  (400 MHz,  $\text{CDCl}_3$ )  $\delta$  7.39-7.37 (m, 2H), 7.33-7.29 (m, 2H), 7.24-7.20 (m, 1H), 6.46 (d,  $J = 15.9$  Hz, 1H), 6.06 (dd,  $J = 15.9, 8.1$  Hz, 1H), 5.97-5.87 (m, 1H), 5.20-5.15 (m, 1H), 5.12-5.08 (m, 1H), 3.44-3.36 (m, 1H), 3.34-3.28 (m, 1H), 3.24-3.18 (m, 1H), 1.86 (br, s, 1H), 1.26 (d,  $J = 6.5$  Hz, 3H) ppm;  $^{13}\text{C NMR}$  (100 MHz,  $\text{CDCl}_3$ )  $\delta$  137.0, 136.8, 133.9, 130.1, 128.5, 127.3, 126.2, 115.9, 55.6, 50.0, 22.0 ppm; **HRMS (ESI)** calculated  $[\text{M}+\text{Na}]^+$  for  $\text{C}_{13}\text{H}_{17}\text{NNa} = 210.1253$ , found: 210.1258.

**(2S,E)-4-phenyl-N-((tetrahydrofuran-2-yl)methyl)but-3-en-2-amine (3i)**: with **A4**, 24 h,

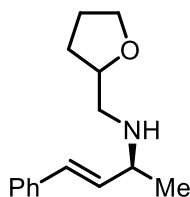

obtained pale yellow oil 46.4 mg; Isolated yield: 99%; 99% ee; dr = 1:1;  $[\alpha]_{\text{D}}^{25} = -53.1$  ( $c = 1.0$ ,  $\text{CHCl}_3$ ); The enantiomeric excess was determined by HPLC on Chiralpak AD-H column, hexane: isopropanol = 99:1, flow rate = 0.6 mL/min, UV detection at 254 nm,  $t_{\text{R}1} = 15.3$  min (major), 16.9 min (minor),  $t_{\text{R}2} = 19.8$  min (minor), 21.2 min (major); **3i**:  $^1\text{H NMR}$  (400 MHz,  $\text{CDCl}_3$ )  $\delta$  7.39-7.37 (m, 2H), 7.33-7.29 (m, 2H), 7.24-7.20 (m, 1H), 6.50 (d,  $J = 5.7$  Hz, 1H), 6.08 (dd,  $J = 8.1, 3.2$  Hz, 1H), 4.08-3.98 (m, 1H), 3.88-3.82 (m, 1H), 3.78-3.72 (m, 1H), 3.45-3.38 (m, 1H), 2.77 (dd,  $J = 11.9, 3.4$  Hz, 1H), 2.68 (d,  $J = 1.9$  Hz, 1H), 2.02-1.84 (m, 3H), 1.58-1.46 (m, 1H), 1.29 (d,  $J = 3.3$  Hz, 3H) ppm;  $^{13}\text{C NMR}$  (100 MHz,  $\text{CDCl}_3$ )  $\delta$  136.9, 133.7, 130.4, 128.5, 127.3, 126.3, 78.5, 67.9, 56.8, 52.3, 29.4, 25.7, 21.9 ppm; **3i'**:  $^1\text{H NMR}$  (400 MHz,  $\text{CDCl}_3$ )  $\delta$  7.39-7.37 (m, 2H), 7.33-7.29 (m, 2H), 7.24-7.20 (m, 1H), 6.46 (d,  $J = 5.7$  Hz, 1H), 6.12 (dd,  $J = 8.1, 3.2$  Hz, 1H), 4.08-3.98 (m, 1H), 3.88-3.82 (m, 1H), 3.78-3.72 (m, 1H), 3.45-3.38 (m, 1H),

2.70 (s, 1H), 2.58 (dd,  $J = 11.9, 8.5$  Hz, 1H), 2.02-1.84 (m, 3H), 1.58-1.46 (m, 1H), 1.27 (d,  $J = 3.3$  Hz, 3H) ppm;  $^{13}\text{C NMR}$  (100 MHz,  $\text{CDCl}_3$ )  $\delta$  136.9, 133.7, 130.2, 128.5, 127.3, 126.3, 77.9, 67.9, 56.2, 51.7, 29.3, 25.7, 21.8 ppm; **HRMS (ESI)** calculated  $[\text{M}+\text{H}]^+$  for  $\text{C}_{15}\text{H}_{22}\text{NO} = 232.1696$ , found: 232.1693.

**(S,E)-N<sup>1</sup>,N<sup>1</sup>-dimethyl-N<sup>2</sup>-(4-phenylbut-3-en-2-yl)ethane-1,2-diamine (3j)**: with **A4**, 24 h,

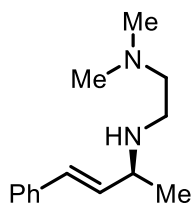

obtained pale yellow oil 42.0 mg; Isolated yield: 96%; 97% ee;  $[\alpha]_{\text{D}}^{25} = -71.1$  ( $c = 1.0$ ,  $\text{CHCl}_3$ ); The enantiomeric excess was determined by (converting it to compound **Bz-3j**) HPLC on Chiralpak AS-H column, hexane: isopropanol = 90:10, flow rate = 0.5 mL/min, UV detection at 254 nm,  $t_{\text{R}} = 43.1$  min (major), 50.8 min (minor);  $^1\text{H NMR}$  (400 MHz,  $\text{CDCl}_3$ )  $\delta$  7.39-7.37 (m, 2H), 7.32-7.29 (m, 2H), 7.24-7.20 (m, 1H), 6.47 (d,  $J = 15.9$  Hz, 1H), 6.08 (dd,  $J = 15.9, 8.0$  Hz, 1H), 3.39-3.32 (m, 1H), 2.78-2.62 (m, 2H), 2.46-2.43 (m, 3H), 2.22 (s, 6H), 1.27 (d,  $J = 6.5$  Hz, 3H) ppm;  $^{13}\text{C NMR}$  (100 MHz,  $\text{CDCl}_3$ )  $\delta$  137.0, 134.0, 130.0, 128.5, 127.3, 126.2, 59.0, 56.5, 45.4, 44.7, 22.0 ppm; **HRMS (ESI)** calculated  $[\text{M}+\text{H}]^+$  for  $\text{C}_{14}\text{H}_{23}\text{N}_2 = 219.1856$ , found: 219.1856.

**(S,E)-N-benzyl-4-phenylbut-3-en-2-amine (3k)**: with **A4**, 24 h, obtained pale yellow oil 43.3

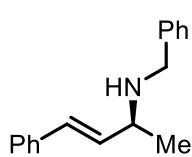

mg; Isolated yield: 91%; 95% ee;  $[\alpha]_{\text{D}}^{25} = -99.5$  ( $c = 1.0$ ,  $\text{CHCl}_3$ ); The enantiomeric excess was determined by HPLC on Chiralpak AD-H column, hexane: isopropanol = 95:5, flow rate = 0.5 mL/min, UV detection at 254 nm,  $t_{\text{R}} = 11.3$  min (major), 12.2 min (minor);  $^1\text{H NMR}$  (400 MHz,  $\text{CDCl}_3$ )  $\delta$  7.40-7.38 (m, 2H), 7.33-7.30 (m, 6H), 7.27-7.20 (m, 2H), 6.48 (d,  $J = 15.9$  Hz, 1H), 6.11 (dd,  $J = 15.9, 8.0$  Hz, 1H), 3.85 (d,  $J = 13.1$  Hz, 1H), 3.73 (d,  $J = 13.1$  Hz, 1H), 3.44-3.37 (m, 1H), 1.27 (d,  $J = 6.5$  Hz, 3H) ppm;  $^{13}\text{C NMR}$  (100 MHz,  $\text{CDCl}_3$ )  $\delta$  140.5, 137.1, 134.2, 130.1, 128.5, 128.4, 128.1, 127.3, 126.9, 126.3, 55.5, 51.5, 22.1 ppm; **HRMS (ESI)** calculated  $[\text{M}+\text{Na}]^+$  for  $\text{C}_{17}\text{H}_{19}\text{NNa} = 260.1410$ , found: 260.1405.

**methyl (S,E)-(4-phenylbut-3-en-2-yl)glycinate (3l)**: with **A3**, 48 h, obtained pale yellow oil

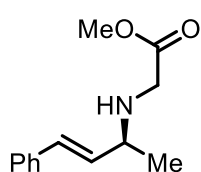

35.1 mg; Isolated yield: 80%; > 99% ee;  $[\alpha]_{\text{D}}^{25} = -154.7$  ( $c = 1.0$ ,  $\text{CHCl}_3$ ); The enantiomeric excess was determined by HPLC on Chiralpak AD-H column, hexane: isopropanol = 99:1, flow rate = 0.5 mL/min, UV detection at 254 nm,  $t_{\text{R}} = 27.2$  min (major), 28.4 min (minor);  $^1\text{H NMR}$  (400 MHz,  $\text{CDCl}_3$ )  $\delta$  7.38-7.35 (m, 2H), 7.32-7.29 (m, 2H), 7.24-7.20 (m, 1H), 6.45 (d,  $J = 15.8$  Hz, 1H), 6.01 (dd,  $J = 15.8, 8.2$  Hz, 1H), 3.69 (s, 3H), 3.42 (d,  $J = 3.1$  Hz, 2H), 3.39-3.32 (m, 1H), 2.17 (br, s, 1H), 1.27 (d,  $J = 6.5$  Hz, 3H) ppm;  $^{13}\text{C NMR}$  (100 MHz,  $\text{CDCl}_3$ )  $\delta$  173.2, 136.8, 133.2, 130.7, 128.5, 127.5, 126.3, 56.2, 51.8, 48.4, 22.0 ppm; **HRMS (ESI)** calculated  $[\text{M}+\text{H}]^+$  for  $\text{C}_{13}\text{H}_{18}\text{NO}_2 = 220.1332$ , found: 220.1331.

**(S,E)-4-phenyl-N-((R)-1-phenylethyl)but-3-en-2-amine (3m):** with **A4**, 48 h, obtained pale yellow oil 28.2 mg; Isolated yield: 56%; > 20:1 dr;  $[\alpha]_{\text{D}}^{25} = -55.3$  (c = 1.0, CHCl<sub>3</sub>); **<sup>1</sup>H NMR** (400 MHz, CDCl<sub>3</sub>)  $\delta$  7.34-7.27 (m, 8H), 7.25-7.19 (m, 2H), 6.42 (d, *J* = 15.9 Hz, 1H), 6.07 (dd, *J* = 15.9, 7.7 Hz, 1H), 3.95-3.90 (m, 1H), 3.38-3.31 (m, 1H), 1.76 (br, s, 1H), 1.37 (d, *J* = 6.6 Hz, 3H), 1.22

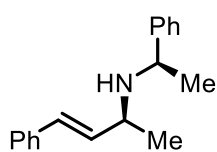

(d, *J* = 6.4 Hz, 3H) ppm; **<sup>13</sup>C NMR** (100 MHz, CDCl<sub>3</sub>)  $\delta$  145.8, 137.1, 134.6, 129.2, 128.5, 127.2, 126.8, 126.5, 126.2, 54.8, 53.0, 23.7, 21.2 ppm; **HRMS (ESI)** calculated  $[M+Na]^+$  for C<sub>18</sub>H<sub>21</sub>NNa = 274.1566, found: 274.1566.

**(S,E)-N-(4-phenylbut-3-en-2-yl)aniline (3n):** with **A3**, 24 h, obtained colorless oil 34.7 mg;

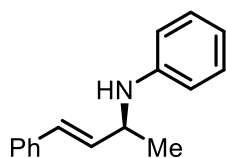

Isolated yield: 78%; 86% ee;  $[\alpha]_{\text{D}}^{25} = -80.6$  (c = 1.0, CHCl<sub>3</sub>); The enantiomeric excess was determined by HPLC on Chiralpak OD-H column, hexane: isopropanol = 95:5, flow rate = 1.0 mL/min, UV detection at 254 nm, *t<sub>R</sub>* = 11.6 min (major), 13.4 min (minor); **<sup>1</sup>H NMR** (400 MHz, CDCl<sub>3</sub>)  $\delta$  7.36-7.34 (m, 2H), 7.30-7.27 (m, 2H), 7.22-7.13 (m, 3H), 6.70-6.63 (m, 3H), 6.57 (d, *J* = 16.0 Hz, 1H), 6.21 (dd, *J* = 16.0, 5.8 Hz, 1H), 4.17-4.11 (m, 1H), 1.40 (d, *J* = 6.6 Hz, 3H) ppm; **<sup>13</sup>C NMR** (100 MHz, CDCl<sub>3</sub>)  $\delta$  147.4, 136.9, 133.2, 129.2, 129.1, 128.5, 127.3, 126.3, 117.3, 113.4, 50.8, 22.1 ppm; **HRMS (ESI)** calculated  $[M+Na]^+$  for C<sub>16</sub>H<sub>17</sub>NNa = 246.1253, found: 246.1253.

**(S,E)-4-methyl-N-(4-phenylbut-3-en-2-yl)aniline (3o):** with **A4**, 48 h, obtained reddish orange oil 10.8 mg (or with **A3**, 36 h, obtained reddish orange oil 43.9 mg);

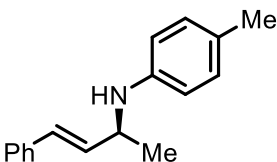

Isolated yield: 23% (or 93%); 93% (or 73%) ee;  $[\alpha]_{\text{D}}^{25} = -99.5$  (c = 1.0, CHCl<sub>3</sub>); The enantiomeric excess was determined by HPLC on Chiralpak AD-H column, hexane: isopropanol = 95:5, flow rate = 0.5 mL/min, UV detection at 254 nm, *t<sub>R</sub>* = 14.6 min (major), 16.5 min (minor); **<sup>1</sup>H NMR** (400 MHz, CDCl<sub>3</sub>)  $\delta$  7.36-7.34 (m, 2H), 7.31-7.27 (m, 2H), 7.22-7.18 (m, 1H), 6.97 (d, *J* = 8.2 Hz, 2H), 6.59-6.55 (m, 3H), 6.21 (dd, *J* = 16.0, 5.9 Hz, 1H), 4.14-4.08 (m, 1H), 2.22 (s, 3H), 1.39 (d, *J* = 6.6 Hz, 3H) ppm; **<sup>13</sup>C NMR** (100 MHz, CDCl<sub>3</sub>)  $\delta$  145.1, 136.9, 133.4, 129.6, 129.1, 128.5, 127.3, 126.5, 126.3, 113.6, 51.1, 22.1, 20.4 ppm; **HRMS (ESI)** calculated  $[M+Na]^+$  for C<sub>17</sub>H<sub>19</sub>NNa = 260.1410, found: 260.1405.

**(S,E)-4-bromo-N-(4-phenylbut-3-en-2-yl)aniline (3p):** with **A3**, 36 h, obtained reddish orange

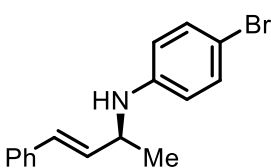

oil 29.2 mg; Isolated yield: 48%; 92% ee;  $[\alpha]_{\text{D}}^{25} = -111.6$  (c = 1.0, CHCl<sub>3</sub>); The enantiomeric excess was determined by HPLC on Chiralpak OD-H column, hexane: isopropanol = 95:5, flow rate = 1.0 mL/min, UV detection at 254 nm, *t<sub>R</sub>* = 13.5 min (minor), 17.2 min (major); **<sup>1</sup>H NMR** (400 MHz, CDCl<sub>3</sub>)  $\delta$  7.35-7.32 (m, 2H), 7.31-7.27 (m, 2H), 7.24-7.19 (m, 3H), 6.56-6.49 (m, 3H), 6.16 (dd, *J* = 16.0, 5.8 Hz, 1H), 4.12-4.05 (m, 1H), 3.75 (br, s, 1H), 1.40 (d, *J* = 6.7 Hz, 3H) ppm; **<sup>13</sup>C NMR** (100 MHz, CDCl<sub>3</sub>)  $\delta$  146.3, 136.7, 132.5, 131.8, 129.5, 128.5,

127.5, 126.3, 114.9, 108.8, 50.9, 22.0 ppm; **HRMS (ESI)** calculated  $[M+H]^+$  for  $C_{16}H_{17}BrN$  = 302.0539, found: 302.0524.

**(S,E)-4-(4-phenylbut-3-en-2-yl)thiomorpholine (3q)**: with **A4**, 24 h, obtained colorless oil 42.9

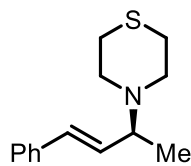

mg; Isolated yield: 92%; 96% ee;  $[\alpha]_D^{25} = -59.0$  ( $c = 1.0$ ,  $CHCl_3$ ); The enantiomeric excess was determined by HPLC on Chiralpak OD-H column, hexane: isopropanol = 90:10, flow rate = 0.5 mL/min, UV detection at 254 nm,  $t_R = 8.7$  min (minor), 9.7 min (major);  **$^1H$  NMR** (400 MHz,  $CDCl_3$ )  $\delta$  7.39-7.37 (m, 2H), 7.33-7.30 (m, 2H), 7.25-7.21 (m, 1H), 6.44 (d,  $J = 16.0$  Hz, 1H), 6.21 (dd,  $J = 16.0$ , 7.2 Hz, 1H), 3.27-3.20 (m, 1H), 2.90-2.80 (m, 4H), 2.69 (t,  $J = 5.0$  Hz, 4H), 1.25 (d,  $J = 6.7$  Hz, 3H) ppm;  **$^{13}C$  NMR** (100 MHz,  $CDCl_3$ )  $\delta$  136.9, 131.7, 130.9, 128.5, 127.4, 126.2, 62.7, 51.6, 28.3, 16.3 ppm; **HRMS (ESI)** calculated  $[M+Na]^+$  for  $C_{14}H_{19}NNS$  = 256.1130, found: 256.1130.

**(S,E)-1-(4-phenylbut-3-en-2-yl)piperidine (3r)**: with **A4**, 24 h, obtained pale yellow oil 40.8 mg;

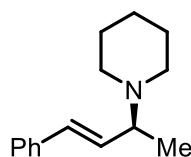

Isolated yield: 95%; 95% ee;  $[\alpha]_D^{25} = -55.7$  ( $c = 1.0$ ,  $CHCl_3$ ); The enantiomeric excess was determined by HPLC on Chiralpak OD-H column, hexane: isopropanol = 99:1, flow rate = 0.5 mL/min, UV detection at 254 nm,  $t_R = 8.6$  min (minor), 9.8 min (major);  **$^1H$  NMR** (400 MHz,  $CDCl_3$ )  $\delta$  7.39-7.37 (m, 2H), 7.32-7.29 (m, 2H), 7.24-7.19 (m, 1H), 6.43 (d,  $J = 16.0$  Hz, 1H), 6.24 (dd,  $J = 15.9$ , 8.0 Hz, 1H), 3.11-3.05 (m, 1H), 2.52-2.50 (m, 4H), 1.63-1.57 (m, 4H), 1.46-1.42 (m, 2H), 1.26 (d,  $J = 6.6$  Hz, 3H) ppm;  **$^{13}C$  NMR** (100 MHz,  $CDCl_3$ )  $\delta$  137.2, 132.7, 130.5, 128.5, 127.2, 126.2, 63.0, 51.0, 26.2, 24.6, 17.7 ppm; **HRMS (ESI)** calculated  $[M+Na]^+$  for  $C_{15}H_{21}NNA$  = 238.1566, found: 238.1568.

**(S,E)-1-(4-phenylbut-3-en-2-yl)pyrrolidine (3s)**: with **A4**, 24 h, obtained pale yellow oil 36.7

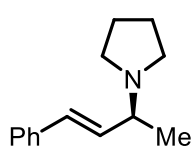

mg; Isolated yield: 91%; 97% ee;  $[\alpha]_D^{25} = -92.4$  ( $c = 1.0$ ,  $CHCl_3$ ); The enantiomeric excess was determined by HPLC on Chiralpak OD-H column, hexane: isopropanol = 95:5, flow rate = 0.5 mL/min, UV detection at 254 nm,  $t_R = 7.6$  min (minor), 8.1 min (major);  **$^1H$  NMR** (400 MHz,  $CDCl_3$ )  $\delta$  7.38-7.36 (m, 2H), 7.32-7.28 (m, 2H), 7.23-7.19 (m, 1H), 6.47 (d,  $J = 15.9$  Hz, 1H), 6.24 (dd,  $J = 15.8$ , 8.6 Hz, 1H), 2.95-2.88 (m, 1H), 2.61-2.55 (m, 4H), 1.81-1.78 (m, 4H), 1.30 (d,  $J = 6.5$  Hz, 3H) ppm;  **$^{13}C$  NMR** (100 MHz,  $CDCl_3$ )  $\delta$  137.1, 133.9, 129.6, 128.5, 127.2, 126.2, 63.1, 52.2, 23.3, 21.0 ppm; **HRMS (ESI)** calculated  $[M+Na]^+$  for  $C_{14}H_{19}NNA$  = 224.1410, found: 224.1410.

**(S,E)-1-(4-phenylbut-3-en-2-yl)indoline (3t)**: with **A3**, 24 h, obtained pale yellow oil 43.6 mg;

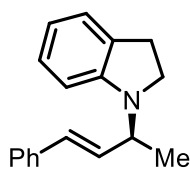

Isolated yield: 87%; 97% ee;  $[\alpha]_D^{25} = -109.4$  ( $c = 1.0$ ,  $CHCl_3$ ); The enantiomeric excess was determined by HPLC on Chiralpak OD-H column, hexane: isopropanol = 95:5, flow rate = 0.5 mL/min; UV detection at 254 nm,  $t_R = 13.8$  min (major), 14.6 min (minor);  **$^1H$  NMR** (400 MHz,  $CDCl_3$ )  $\delta$  7.37-7.34 (m, 2H), 7.31-7.27 (m, 2H), 7.23-7.19 (m, 1H), 7.07-7.02 (m, 2H), 6.64-6.60 (m, 1H),

6.57-6.52 (m, 2H), 6.32 (dd,  $J = 16.1, 5.6$  Hz, 1H), 4.39-4.33 (m, 1H), 3.46-3.36 (m, 2H), 2.95 (t,  $J = 8.4$  Hz, 2H), 1.40 (d,  $J = 6.9$  Hz, 3H) ppm;  $^{13}\text{C NMR}$  (100 MHz,  $\text{CDCl}_3$ )  $\delta$  151.0, 136.9, 130.7, 130.4, 130.3, 128.5, 127.4, 127.2, 126.3, 124.4, 117.2, 107.6, 52.2, 47.3, 28.2, 16.1 ppm; **HRMS (ESI)** calculated  $[\text{M}+\text{Na}]^+$  for  $\text{C}_{18}\text{H}_{19}\text{NNa} = 272.1410$ , found: 272.1412.

**(S,E)-2-(4-phenylbut-3-en-2-yl)-1,2,3,4-tetrahydroisoquinoline (3u)**: with **A4**, 24 h, obtained

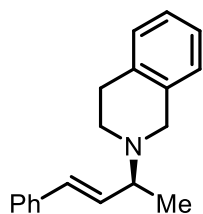

pale yellow oil 52.6 mg; Isolated yield: 99%; > 99% ee;  $[\alpha]_{\text{D}}^{25} = -51.5$  ( $c = 1.0$ ,  $\text{CHCl}_3$ ); The enantiomeric excess was determined by HPLC on Chiralpak OD-H column, hexane: isopropanol = 95:5, flow rate = 0.5 mL/min, UV detection at 254 nm,  $t_{\text{R}} = 11.0$  min (minor), 14.5 min (major);  $^1\text{H NMR}$  (400 MHz,  $\text{CDCl}_3$ )  $\delta$  7.41-7.39 (m, 2H), 7.34-7.30 (m, 2H), 7.24-7.22 (m, 1H), 7.12-7.07 (m, 3H), 7.03-7.01 (m, 1H), 6.53 (d,  $J = 16.0$  Hz, 1H), 6.30 (dd,  $J = 16.0, 7.9$  Hz, 1H), 3.83-3.74 (m, 2H), 3.34-3.27 (m, 1H), 2.97-2.90 (m, 3H), 2.84-2.73 (m, 1H), 1.37 (d,  $J = 6.6$  Hz, 3H) ppm;  $^{13}\text{C NMR}$  (100 MHz,  $\text{CDCl}_3$ )  $\delta$  137.0, 134.9, 134.4, 132.3, 130.9, 128.6, 128.5, 127.4, 126.8, 126.3, 126.0, 125.5, 61.9, 53.0, 47.3, 29.4, 17.9 ppm; **HRMS (ESI)** calculated  $[\text{M}+\text{Na}]^+$  for  $\text{C}_{19}\text{H}_{21}\text{NNa} = 286.1566$ , found: 286.1563.

**(S,E)-2-(4-(4-phenylbut-3-en-2-yl)piperazin-1-yl)pyrimidine (3v)**: with **A4**, 48 h, obtained

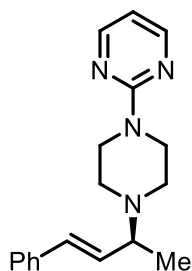

pale yellow oil 58.9 mg; Isolated yield: 99%; 95% ee;  $[\alpha]_{\text{D}}^{25} = -68.1$  ( $c = 1.0$ ,  $\text{CHCl}_3$ ); The enantiomeric excess was determined by HPLC on Chiralpak AD-H column, hexane: isopropanol = 95:5, flow rate = 0.5 mL/min, UV detection at 254 nm,  $t_{\text{R}} = 12.7$  min (major), 15.2 min (minor);  $^1\text{H NMR}$  (400 MHz,  $\text{CDCl}_3$ )  $\delta$  8.29 (d,  $J = 4.7$  Hz, 2H), 7.39-7.36 (m, 2H), 7.33-7.29 (m, 2H), 7.24-7.20 (m, 1H), 6.49-6.45 (m, 2H), 6.22 (dd,  $J = 15.9, 8.0$  Hz, 1H), 3.84 (t,  $J = 5.2$  Hz, 4H), 3.16-3.09 (m, 1H), 2.68-2.58 (m, 4H), 1.30 (d,  $J = 6.6$  Hz, 3H) ppm;  $^{13}\text{C NMR}$  (100 MHz,  $\text{CDCl}_3$ )  $\delta$  161.6, 157.7, 136.9, 132.1, 131.1, 128.6, 127.4, 126.3, 109.7, 62.6, 49.9, 43.9, 17.8 ppm; **HRMS (ESI)** calculated  $[\text{M}+\text{Na}]^+$  for  $\text{C}_{18}\text{H}_{22}\text{N}_4\text{Na} = 317.1737$ , found: 317.1730.

**(S,E)-N-allyl-N-methyl-4-phenylbut-3-en-2-amine (3w)**: with **A4**, 24 h, obtained pale yellow

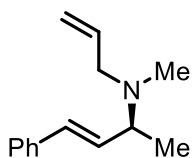

oil 33.2 mg; Isolated yield: 82%; 99% ee;  $[\alpha]_{\text{D}}^{25} = -49.2$  ( $c = 1.0$ ,  $\text{CHCl}_3$ ); The enantiomeric excess was determined by HPLC on Chiralpak OD-H column, hexane: isopropanol = 99:1, flow rate = 0.5 mL/min, UV detection at 254 nm,  $t_{\text{R}} = 8.0$  min (minor), 9.3 min (major);  $^1\text{H NMR}$  (400 MHz,  $\text{CDCl}_3$ )  $\delta$  7.39-7.36 (m, 2H), 7.33-7.28 (m, 2H), 7.24-7.20 (m, 1H), 6.45 (d,  $J = 16.0$  Hz, 1H), 6.22 (dd,  $J = 16.0, 7.6$  Hz, 1H), 5.93-5.83 (m, 1H), 5.20-5.11 (m, 2H), 3.34-3.27 (m, 1H), 3.19-3.13 (m, 1H), 3.09-3.03 (m, 1H), 2.25 (s, 3H), 1.25 (d,  $J = 6.7$  Hz, 3H) ppm;  $^{13}\text{C NMR}$  (100 MHz,  $\text{CDCl}_3$ )  $\delta$  137.2, 136.3, 131.9, 130.8, 128.5, 127.3, 126.3, 117.3, 60.4, 57.4, 37.7, 17.2 ppm; **HRMS (ESI)** calculated  $[\text{M}+\text{Na}]^+$  for  $\text{C}_{14}\text{H}_{19}\text{NNa} = 224.1410$ , found: 224.1412.

**(S,E)-N-benzyl-N-methyl-4-phenylbut-3-en-2-amine (3x):** with **A3**, 24 h, obtained pale yellow

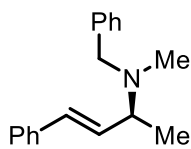

oil 44.2 mg; Isolated yield: 88%; 98% ee;  $[\alpha]_D^{25} = -91.9$  ( $c = 1.0$ ,  $\text{CHCl}_3$ ); The enantiomeric excess was determined by HPLC on Chiralpak OD-H column, hexane: isopropanol = 90:10, flow rate = 1.0 mL/min, UV detection at 254 nm,  $t_R = 5.0$  min (minor), 6.0 min (major);  $^1\text{H NMR}$  (400 MHz,  $\text{CDCl}_3$ )  $\delta$  7.41-7.39 (m, 2H), 7.36-7.30 (m, 6H), 7.26-7.21 (m, 2H), 6.47 (d,  $J = 16.1$  Hz, 1H), 6.31 (dd,  $J = 16.0$ , 7.3 Hz, 1H), 3.65 (d,  $J = 13.2$  Hz, 1H), 3.51 (d,  $J = 13.2$  Hz, 1H), 3.39-3.32 (m, 1H), 2.22 (s, 3H), 1.30 (d,  $J = 6.7$  Hz, 3H) ppm;  $^{13}\text{C NMR}$  (100 MHz,  $\text{CDCl}_3$ )  $\delta$  139.8, 137.2, 132.0, 130.8, 128.9, 128.5, 128.2, 127.3, 126.8, 126.2, 60.4, 58.2, 37.9, 16.9 ppm; **HRMS (ESI)** calculated  $[\text{M}+\text{Na}]^+$  for  $\text{C}_{18}\text{H}_{21}\text{NNa} = 274.1566$ , found: 274.1563.

**(S,E)-N,N-dibenzyl-4-phenylbut-3-en-2-amine (3y):** with **A3**, 24 h, obtained pale yellow oil

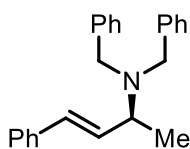

34.6 mg; Isolated yield: 53%; 96% ee;  $[\alpha]_D^{25} = -193.7$  ( $c = 1.0$ ,  $\text{CHCl}_3$ ); The enantiomeric excess was determined by HPLC on Chiralpak OD-H column, hexane: isopropanol = 95:5, flow rate = 0.5 mL/min, UV detection at 254 nm,  $t_R = 7.6$  min (major), 10.5 min (minor);  $^1\text{H NMR}$  (400 MHz,  $\text{CDCl}_3$ )  $\delta$  7.42-7.38 (m, 6H), 7.34-7.29 (m, 6H), 7.24-7.20 (m, 3H), 6.43 (d,  $J = 16.2$  Hz, 1H), 6.32 (dd,  $J = 16.1$ , 6.6 Hz, 1H), 3.71 (d,  $J = 13.9$  Hz, 2H), 3.59 (d,  $J = 13.9$  Hz, 2H), 3.51-3.44 (m, 1H), 1.29 (d,  $J = 6.8$  Hz, 3H) ppm;  $^{13}\text{C NMR}$  (100 MHz,  $\text{CDCl}_3$ )  $\delta$  140.6, 137.3, 131.6, 130.9, 128.52, 128.50, 128.2, 127.2, 126.7, 126.2, 54.8, 53.7, 15.8 ppm; **HRMS (ESI)** calculated  $[\text{M}+\text{Na}]^+$  for  $\text{C}_{24}\text{H}_{25}\text{NNa} = 350.1879$ , found: 350.1873.

**(S,E)-N,N-diethyl-4-phenylbut-3-en-2-amine (3z):** with **A3**, 36 h, obtained pale yellow oil 11.0

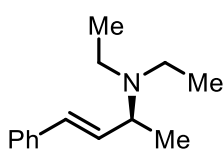

mg; Isolated yield: 27%; 96% ee;  $[\alpha]_D^{25} = -26.8$  ( $c = 1.0$ ,  $\text{CHCl}_3$ ); The enantiomeric excess was determined by HPLC on Chiralpak OJ-H column, hexane: isopropanol = 95:5, flow rate = 0.5 mL/min, UV detection at 254 nm,  $t_R = 7.7$  min (minor), 8.0 min (major);  $^1\text{H NMR}$  (400 MHz,  $\text{CDCl}_3$ )  $\delta$  7.39-7.37 (m, 2H), 7.33-7.29 (m, 2H), 7.24-7.20 (m, 1H), 6.44 (d,  $J = 16.0$  Hz, 1H), 6.24 (dd,  $J = 16.0$ , 7.5 Hz, 1H), 3.50-3.43 (m, 1H), 2.69-2.53 (m, 4H), 1.24 (d,  $J = 6.6$  Hz, 3H), 1.06 (t,  $J = 7.2$  Hz, 6H) ppm;  $^{13}\text{C NMR}$  (100 MHz,  $\text{CDCl}_3$ )  $\delta$  137.2, 133.0, 130.0, 128.5, 127.2, 126.2, 57.5, 43.4, 17.4, 12.8 ppm; **HRMS (ESI)** calculated  $[\text{M}+\text{Na}]^+$  for  $\text{C}_{14}\text{H}_{21}\text{NNa} = 226.1566$ , found: 226.1568.

**(S,E)-N-methyl-N-(4-phenylbut-3-en-2-yl)aniline (3aa):** with **A3**, 36 h, obtained pale yellow

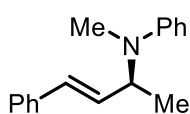

oil 10.4 mg; Isolated yield: 22%; 90% ee;  $[\alpha]_D^{25} = -169.9$  ( $c = 1.0$ ,  $\text{CHCl}_3$ ); The enantiomeric excess was determined by HPLC on Chiralpak OJ-H column, hexane: isopropanol = 95:5, flow rate = 1.0 mL/min, UV detection at 254 nm,  $t_R = 11.7$  min (major), 15.0 min (minor);  $^1\text{H NMR}$  (400 MHz,  $\text{CDCl}_3$ )  $\delta$  7.38-7.35 (m, 2H), 7.32-7.20 (m, 5H), 6.86-6.83 (m, 2H), 6.75-6.71 (m, 1H), 6.48 (dd,  $J = 16.2$ , 1.9 Hz, 1H), 6.30 (dd,  $J = 16.2$ , 4.4 Hz, 1H), 4.69-4.62 (m, 1H), 2.79 (s, 3H), 1.37 (d,  $J = 6.8$  Hz, 3H) ppm;

$^{13}\text{C}$  NMR (100 MHz,  $\text{CDCl}_3$ )  $\delta$  150.0, 137.1, 131.3, 130.0, 129.2, 128.6, 127.4, 126.3, 116.8, 113.4, 54.9, 31.7, 16.2 ppm; **HRMS (ESI)** calculated  $[\text{M}+\text{Na}]^+$  for  $\text{C}_{17}\text{H}_{19}\text{NNa}$  = 260.1410, found: 260.1411.

**(S,E)-N-(furan-2-ylmethyl)-4-(2-methoxyphenyl)but-3-en-2-amine (3ab)**: with **A4**, 24 h,

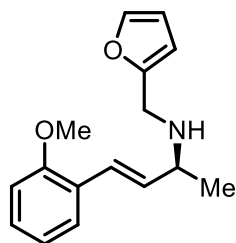

obtained pale yellow oil 51.5 mg; Isolated yield: 99%; > 99% ee;  $[\alpha]_{\text{D}}^{25}$  = -114.1 ( $c$  = 1.0,  $\text{CHCl}_3$ ); The enantiomeric excess was determined by HPLC on Chiralpak OJ-H column, hexane: isopropanol = 99:1, flow rate = 0.5 mL/min, UV detection at 254 nm,  $t_{\text{R}}$  = 27.5 min (major), 32.5 min (minor);  $^1\text{H}$  NMR (400 MHz,  $\text{CDCl}_3$ )  $\delta$  7.46 (dd,  $J$  = 7.6, 1.8 Hz, 1H), 7.36 (dd,  $J$  = 1.9, 0.9 Hz, 1H), 7.23-7.19 (m, 1H), 6.94-6.90 (m, 1H),

6.87 (dd,  $J$  = 8.2, 1.1 Hz, 1H), 6.81 (d,  $J$  = 16.0 Hz, 1H), 6.31 (dd,  $J$  = 3.2, 1.8 Hz, 1H), 6.17 (dd,  $J$  = 3.2, 0.8 Hz, 1H), 6.07 (dd,  $J$  = 16.0, 8.2 Hz, 1H), 3.85 (s, 3H), 3.83 (d,  $J$  = 14.7 Hz, 1H), 3.74 (d,  $J$  = 14.4 Hz, 1H), 3.43-3.36 (m, 1H), 1.26 (d,  $J$  = 6.4 Hz, 3H) ppm;  $^{13}\text{C}$  NMR (100 MHz,  $\text{CDCl}_3$ )  $\delta$  156.6, 154.1, 141.7, 134.3, 128.4, 126.7, 126.0, 125.2, 120.6, 110.8, 110.0, 106.8, 55.7, 55.4, 43.8, 22.1 ppm; **HRMS (ESI)** calculated  $[\text{M}+\text{H}]^+$  for  $\text{C}_{16}\text{H}_{20}\text{NO}_2$  = 258.1489, found: 258.1484.

**(S,E)-N-(furan-2-ylmethyl)-4-(3-methoxyphenyl)but-3-en-2-amine (3ac)**: with **A4**, 24 h,

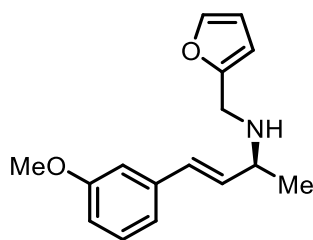

obtained pale yellow oil 51.0 mg; Isolated yield: 99%; > 99% ee;  $[\alpha]_{\text{D}}^{25}$  = -104.0 ( $c$  = 1.0,  $\text{CHCl}_3$ ); The enantiomeric excess was determined by HPLC on Chiralpak AD-H column, hexane: isopropanol = 99:1, flow rate = 0.5 mL/min, UV detection at 254 nm,  $t_{\text{R}}$  = 28.0 min (major), 29.9 min (minor);  $^1\text{H}$  NMR (400 MHz,  $\text{CDCl}_3$ )  $\delta$  7.36 (dd,  $J$  = 1.9, 0.9 Hz, 1H), 7.23 (t,  $J$  = 7.9 Hz, 1H),

6.99-6.96 (m, 1H), 6.93-6.92 (m, 1H), 6.79 (ddd,  $J$  = 8.2, 2.6, 0.9 Hz, 1H), 6.46 (d,  $J$  = 15.9 Hz, 1H), 6.31 (dd,  $J$  = 3.1, 1.9 Hz, 1H), 6.16 (dd,  $J$  = 3.2, 0.8 Hz, 1H), 6.07 (dd,  $J$  = 15.9, 8.1 Hz, 1H), 3.83 (d,  $J$  = 14.4 Hz, 1H), 3.82 (s, 3H), 3.74 (d,  $J$  = 14.4 Hz, 1H), 3.42-3.35 (m, 1H), 1.88 (br, s, 1H), 1.26 (d,  $J$  = 6.4 Hz, 3H) ppm;  $^{13}\text{C}$  NMR (100 MHz,  $\text{CDCl}_3$ )  $\delta$  159.8, 153.8, 141.8, 138.4, 133.9, 130.4, 129.5, 119.0, 113.2, 111.4, 110.1, 106.8, 55.2, 43.7, 21.9 ppm; **HRMS (ESI)** calculated  $[\text{M}+\text{H}]^+$  for  $\text{C}_{16}\text{H}_{20}\text{NO}_2$  = 258.1489, found: 258.1481.

**(S,E)-N-(furan-2-ylmethyl)-4-(4-methoxyphenyl)but-3-en-2-amine (3ad)**: with **A4**, 24 h,

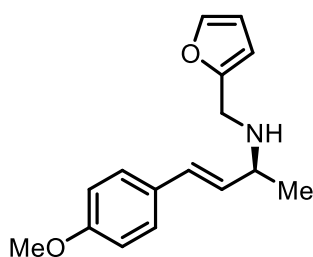

obtained pale yellow oil 51.5 mg; Isolated yield: 99%; > 99% ee;  $[\alpha]_{\text{D}}^{25}$  = -159.0 ( $c$  = 1.0,  $\text{CHCl}_3$ ); The enantiomeric excess was determined by HPLC on Chiralpak AD-H column, hexane: isopropanol = 99:1, flow rate = 0.5 mL/min, UV detection at 254 nm,  $t_{\text{R}}$  = 33.8 min (major), 35.4 min (minor);  $^1\text{H}$  NMR (400 MHz,  $\text{CDCl}_3$ )  $\delta$  7.36 (dd,  $J$  = 2.0, 0.8 Hz, 1H), 7.34-7.30 (m, 2H), 6.88-

6.84 (m, 2H), 6.43 (d,  $J$  = 15.9 Hz, 1H), 6.31 (dd,  $J$  = 3.2, 1.8 Hz, 1H), 6.16 (dd,  $J$  = 3.1, 0.8 Hz,

1H), 5.93 (dd,  $J = 15.8, 8.2$  Hz, 1H), 3.83 (d,  $J = 13.2$  Hz, 1H), 3.81 (s, 3H), 3.73 (d,  $J = 14.4$  Hz, 1H), 3.39-3.33 (m, 1H), 1.86 (br, s, 1H), 1.25 (d,  $J = 6.4$  Hz, 3H) ppm;  $^{13}\text{C NMR}$  (100 MHz,  $\text{CDCl}_3$ )  $\delta$  159.0, 153.9, 141.8, 131.4, 130.0, 129.7, 127.4, 113.9, 110.1, 106.8, 55.33, 55.29, 43.8, 22.1 ppm; **HRMS (ESI)** calculated  $[\text{M}+\text{Na}]^+$  for  $\text{C}_{16}\text{H}_{19}\text{NNaO}_2 = 280.1308$ , found: 280.1310.

**(S,E)-4-(4-fluorophenyl)-N-(furan-2-ylmethyl)but-3-en-2-amine (3ae):** with **A4**, 24 h,

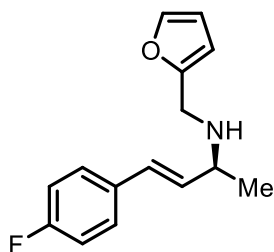

obtained pale yellow oil 49.1 mg; Isolated yield: 99%; > 99% ee;  $[\alpha]_{\text{D}}^{25} = -137.4$  ( $c = 1.0$ ,  $\text{CHCl}_3$ ); The enantiomeric excess was determined by HPLC on Chiralpak OJ-H column, hexane: isopropanol = 99:1, flow rate = 0.5 mL/min, UV detection at 254 nm,  $t_{\text{R}} = 25.0$  min (major), 27.4 min (minor);  $^1\text{H NMR}$  (400 MHz,  $\text{CDCl}_3$ )  $\delta$  7.37-7.32 (m, 3H), 7.03-6.97 (m, 2H), 6.45 (d,  $J = 15.8$  Hz, 1H), 6.31 (dd,  $J = 3.1, 1.9$  Hz, 1H), 6.16 (dd,  $J = 3.2, 0.8$  Hz, 1H), 5.99 (dd,  $J = 15.8, 8.1$  Hz, 1H), 3.82 (d,  $J = 14.4$  Hz, 1H), 3.73 (d,  $J = 14.4$  Hz, 1H), 3.41-3.34 (m, 1H), 1.83 (br, s, 1H), 1.25 (d,  $J = 6.4$  Hz, 3H) ppm;  $^{13}\text{C NMR}$  (100 MHz,  $\text{CDCl}_3$ )  $\delta$  162.1 (d,  $J = 246.5$  Hz), 153.8, 141.8, 133.4 (d,  $J = 2.2$  Hz), 133.1 (d,  $J = 3.2$  Hz), 129.3, 127.7 (d,  $J = 7.9$  Hz), 115.4 (d,  $J = 21.4$  Hz), 110.1, 106.8, 55.2, 43.8, 22.0 ppm;  $^{19}\text{F NMR}$  (376 MHz,  $\text{CDCl}_3$ )  $\delta$  -114.82 ppm; **HRMS (ESI)** calculated  $[\text{M}+\text{Na}]^+$  for  $\text{C}_{15}\text{H}_{16}\text{FNNaO} = 268.1108$ , found: 268.1103.

**(S,E)-N-(furan-2-ylmethyl)-4-(4-(trifluoromethyl)phenyl)but-3-en-2-amine (3af):** with **A4**,

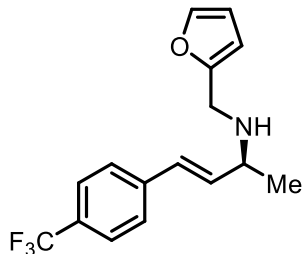

24 h, obtained pale yellow oil 59.2 mg; Isolated yield: 99%; 96% ee;  $[\alpha]_{\text{D}}^{25} = -99.8$  ( $c = 1.0$ ,  $\text{CHCl}_3$ ); The enantiomeric excess was determined by HPLC on Chiralpak AS-H column, hexane: isopropanol = 99:1, flow rate = 0.5 mL/min, UV detection at 254 nm,  $t_{\text{R}} = 11.5$  min (major), 13.0 min (minor);  $^1\text{H NMR}$  (400 MHz,  $\text{CDCl}_3$ )  $\delta$  7.56 (d,  $J = 8.2$  Hz, 2H), 7.46 (d,  $J = 8.2$  Hz, 2H), 7.37 (dd,  $J = 1.9, 0.8$  Hz, 1H), 6.52 (d,  $J = 15.9$  Hz, 1H), 6.31 (dd,  $J = 3.2, 1.8$  Hz, 1H), 6.21-6.15 (m, 2H), 3.82 (d,  $J = 14.5$  Hz, 1H), 3.74 (d,  $J = 14.5$  Hz, 1H), 3.45-3.38 (m, 1H), 1.82 (br, s, 1H), 1.27 (d,  $J = 6.5$  Hz, 3H) ppm;  $^{13}\text{C NMR}$  (100 MHz,  $\text{CDCl}_3$ )  $\delta$  153.7, 141.8, 140.5 (q,  $J = 1.6$  Hz), 136.5, 129.11 (q,  $J = 32.2$  Hz), 129.09, 126.4, 125.5 (q,  $J = 3.9$  Hz), 124.2 (q,  $J = 270.5$  Hz), 110.1, 106.9, 55.1, 43.8, 21.8 ppm;  $^{19}\text{F NMR}$  (376 MHz,  $\text{CDCl}_3$ )  $\delta$  -62.36 ppm; **HRMS (ESI)** calculated  $[\text{M}+\text{H}]^+$  for  $\text{C}_{16}\text{H}_{17}\text{F}_3\text{NO} = 296.1257$ , found: 296.1250.

**(S,E)-4-(3-((furan-2-ylmethyl)amino)but-1-en-1-yl)-N,N-dimethylaniline (3ag):** with **A4**, 24 h,

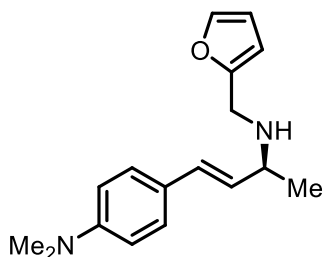

obtained pale yellow oil 49.8 mg; Isolated yield: 92%; > 99% ee;  $[\alpha]_{\text{D}}^{25} = -167.1$  ( $c = 1.0$ ,  $\text{CHCl}_3$ ); The enantiomeric excess was determined by HPLC on Chiralpak AD-H column, hexane: isopropanol = 99:1, flow rate = 0.6 mL/min, UV detection at 254 nm,  $t_{\text{R}} = 29.8$  min (minor), 32.1 min (major);  $^1\text{H NMR}$  (400 MHz,  $\text{CDCl}_3$ )  $\delta$  7.36 (dd,  $J = 1.9, 0.8$  Hz, 1H), 7.29-7.27 (m, 2H), 6.70-



6.67 (m, 2H), 6.39 (d,  $J = 15.8$  Hz, 1H), 6.31 (dd,  $J = 3.2, 1.9$  Hz, 1H), 6.16 (dd,  $J = 3.1, 0.8$  Hz, 1H), 5.85 (dd,  $J = 15.8, 8.2$  Hz, 1H), 3.83 (d,  $J = 14.4$  Hz, 1H), 3.73 (d,  $J = 14.4$  Hz, 1H), 3.38-3.31 (m, 1H), 2.95 (s, 6H), 2.24 (br, s, 1H), 1.25 (d,  $J = 6.4$  Hz, 3H) ppm;  $^{13}\text{C NMR}$  (100 MHz,  $\text{CDCl}_3$ )  $\delta$  153.9, 150.0, 141.7, 130.6, 129.1, 127.2, 125.4, 112.5, 110.0, 106.8, 55.5, 43.6, 40.6, 22.1 ppm; **HRMS (ESI)** calculated  $[\text{M}+\text{H}]^+$  for  $\text{C}_{17}\text{H}_{23}\text{N}_2\text{O} = 271.1805$ , found: 271.1805.

**(S,E)-4-(furan-2-yl)-N-(furan-2-ylmethyl)but-3-en-2-amine (3ah):** with **A4**, 36 h, obtained

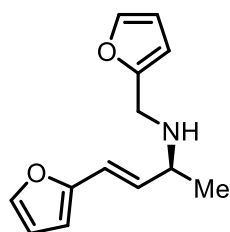

pale yellow oil 37.0 mg; Isolated yield: 85%; 96% ee;  $[\alpha]_{\text{D}}^{25} = -124.5$  ( $c = 1.0$ ,  $\text{CHCl}_3$ ); The enantiomeric excess was determined by HPLC on Chiralpak OJ-H column, hexane: isopropanol = 95:5, flow rate = 0.5 mL/min, UV detection at 254 nm,  $t_{\text{R}} = 19.1$  min (major), 24.9 min (minor);  $^1\text{H NMR}$  (400 MHz,  $\text{CDCl}_3$ )  $\delta$  7.36 (dd,  $J = 1.9, 0.9$  Hz, 1H), 7.34 (d,  $J = 1.8$  Hz, 1H), 6.36 (dd,  $J = 3.3, 1.8$  Hz, 1H), 6.34-6.30 (m, 2H), 6.21 (d,  $J = 3.2$  Hz, 1H), 6.16 (dd,  $J = 3.2, 0.8$  Hz, 1H), 6.02 (dd,  $J = 15.8, 8.0$  Hz, 1H), 3.82 (d,  $J = 14.5$  Hz, 1H), 3.72 (d,  $J = 14.4$  Hz, 1H), 3.37-3.30 (m, 1H), 1.24 (d,  $J = 6.5$  Hz, 3H) ppm;  $^{13}\text{C NMR}$  (100 MHz,  $\text{CDCl}_3$ )  $\delta$  154.0, 152.6, 141.8, 141.7, 132.5, 118.9, 111.2, 110.1, 107.2, 106.8, 54.9, 43.8, 22.0 ppm; **HRMS (ESI)** calculated  $[\text{M}+\text{H}]^+$  for  $\text{C}_{13}\text{H}_{16}\text{NO}_2 = 218.1176$ , found: 218.1177.

**(S,E)-4-cyclohexyl-N-(furan-2-ylmethyl)but-3-en-2-amine (3ai):** with **A4**, 24 h, obtained

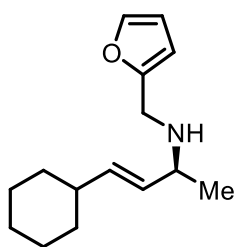

pale yellow oil 45.4 mg; Isolated yield: 97%; 96% ee;  $[\alpha]_{\text{D}}^{25} = -51.0$  ( $c = 1.0$ ,  $\text{CHCl}_3$ ); The enantiomeric excess was determined by HPLC on Chiralpak AD-H column, hexane: isopropanol = 95:5, flow rate = 0.5 mL/min, UV detection at 220 nm,  $t_{\text{R}} = 8.7$  min (major), 9.4 min (minor);  $^1\text{H NMR}$  (400 MHz,  $\text{CDCl}_3$ )  $\delta$  7.34 (dd,  $J = 1.9, 0.9$  Hz, 1H), 6.30 (dd,  $J = 3.2, 1.8$  Hz, 1H), 6.13 (dd,  $J = 3.1, 0.9$  Hz, 1H), 5.48 (dd,  $J = 15.4, 6.6$  Hz, 1H), 5.24-5.18 m, 1H), 3.77 (d,  $J = 14.5$  Hz, 1H), 3.67 (d,  $J = 14.4$  Hz, 1H), 3.16-3.09 (m, 1H), 1.99-1.90 (m, 1H), 1.74-1.69 (m, 4H), 1.67-1.64 (m, 1H), 1.29-1.16 (m, 3H), 1.14 (d,  $J = 6.4$  Hz, 3H), 1.11-1.02 (m, 2H) ppm;  $^{13}\text{C NMR}$  (100 MHz,  $\text{CDCl}_3$ )  $\delta$  154.2, 141.6, 137.9, 130.9, 110.0, 106.6, 55.1, 43.6, 40.4, 33.1, 33.0, 26.2, 26.0, 22.1 ppm; **HRMS (ESI)** calculated  $[\text{M}+\text{H}]^+$  for  $\text{C}_{15}\text{H}_{24}\text{NO} = 234.1852$ , found: 234.1853.

**(S,E)-N-(furan-2-ylmethyl)-6-phenylhex-3-en-2-amine (3aj):** with **A4**, 24 h, obtained

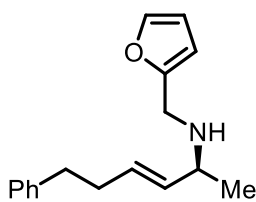

pale yellow oil 51.0 mg; Isolated yield: 99%; 99% ee;  $[\alpha]_{\text{D}}^{25} = -41.1$  ( $c = 1.0$ ,  $\text{CHCl}_3$ ); The enantiomeric excess was determined by HPLC on Chiralpak OJ-H column, hexane: isopropanol = 95:5, flow rate = 0.5 mL/min, UV detection at 220 nm,  $t_{\text{R}} = 17.6$  min (minor), 18.7 min (major);  $^1\text{H NMR}$  (400 MHz,  $\text{CDCl}_3$ )  $\delta$  7.34 (dd,  $J = 1.9, 0.9$  Hz, 1H), 7.29-7.25 (m, 2H), 7.19-7.15 (m, 3H), 6.29 (dd,  $J = 3.1, 1.9$  Hz, 1H), 6.10 (dd,  $J = 3.2, 0.7$  Hz, 1H), 5.55 (dt,  $J = 15.2, 6.6$  Hz, 1H), 5.27 (ddt,  $J = 15.4, 8.1, 1.4$  Hz, 1H), 3.69 (d,  $J = 14.4$  Hz, 1H), 3.60 (d,  $J = 14.4$  Hz, 1H), 3.17-3.10 (m, 1H), 2.76-2.65 (m, 2H), 2.39-2.33 (m, 2H), 1.12

(d,  $J = 6.4$  Hz, 3H) ppm;  $^{13}\text{C NMR}$  (100 MHz,  $\text{CDCl}_3$ )  $\delta$  154.2, 141.8, 141.6, 134.6, 130.7, 128.5, 128.3, 125.8, 110.0, 106.6, 54.9, 43.6, 35.8, 34.0, 22.0 ppm; **HRMS (ESI)** calculated  $[\text{M}+\text{H}]^+$  for  $\text{C}_{17}\text{H}_{22}\text{NO}$  = 256.1696, found: 256.1691.

**(S,E)-4-(4-(2-methoxyphenyl)but-3-en-2-yl)morpholine (3ak)**: with **A4**, 24 h, obtained pale

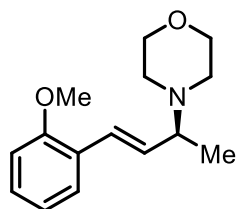

yellow oil 49.5 mg; Isolated yield: 99%; > 99% ee;  $[\alpha]_{\text{D}}^{25} = -61.6$  ( $c = 1.0$ ,  $\text{CHCl}_3$ ); The enantiomeric excess was determined by HPLC on Chiralpak OD-H column, hexane: isopropanol = 99:1, flow rate = 0.5 mL/min, UV detection at 254 nm,  $t_{\text{R}} = 22.1$  min (minor), 24.2 min (major);  $^1\text{H NMR}$  (400 MHz,  $\text{CDCl}_3$ )  $\delta$  7.44 (dd,  $J = 7.6, 1.7$  Hz, 1H), 7.23-7.19 (m, 1H), 6.93-6.89 (m, 1H), 6.86 (dd,  $J = 8.2, 1.2$  Hz, 1H), 6.79 (d,  $J = 16.0$  Hz, 1H), 6.17 (dd,  $J = 16.0, 8.3$  Hz, 1H), 3.84 (s, 3H), 3.73 (t,  $J = 4.7$  Hz, 4H), 3.06-2.99 (m, 1H), 2.62-2.52 (m, 4H), 1.26 (d,  $J = 6.6$  Hz, 3H) ppm;  $^{13}\text{C NMR}$  (100 MHz,  $\text{CDCl}_3$ )  $\delta$  156.5, 132.5, 128.5, 126.6, 125.9, 125.8, 120.6, 110.9, 67.2, 63.6, 55.4, 50.8, 17.9 ppm; **HRMS (ESI)** calculated  $[\text{M}+\text{H}]^+$  for  $\text{C}_{15}\text{H}_{22}\text{NO}_2$  = 248.1645, found: 248.1641.

**(S,E)-4-(4-(3-methoxyphenyl)but-3-en-2-yl)morpholine (3al)**: with **A4**, 24 h, obtained pale

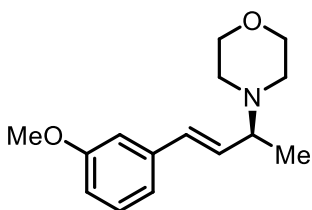

yellow oil 49.5 mg; Isolated yield: 99%; 98% ee;  $[\alpha]_{\text{D}}^{25} = -58.7$  ( $c = 1.0$ ,  $\text{CHCl}_3$ ); The enantiomeric excess was determined by HPLC on Chiralpak AD-H column, hexane: isopropanol = 99:1, flow rate = 0.5 mL/min, UV detection at 254 nm,  $t_{\text{R}} = 21.2$  min (major), 24.6 min (minor);  $^1\text{H NMR}$  (400 MHz,  $\text{CDCl}_3$ )  $\delta$  7.23 (t,  $J = 7.9$  Hz, 1H), 6.96 (d,  $J = 7.7$  Hz, 1H), 6.92-6.91 (m, 1H), 6.79 (dd,  $J = 8.2, 2.4$  Hz, 1H), 6.44 (d,  $J = 15.9$  Hz, 1H), 6.17 (dd,  $J = 15.9, 8.2$  Hz, 1H), 3.81 (s, 3H), 3.73 (t,  $J = 4.7$  Hz, 4H), 3.06-2.99 (m, 1H), 2.61-2.52 (m, 4H), 1.26 (d,  $J = 6.5$  Hz, 3H) ppm;  $^{13}\text{C NMR}$  (100 MHz,  $\text{CDCl}_3$ )  $\delta$  159.8, 138.3, 132.3, 131.1, 129.5, 118.9, 113.2, 111.4, 67.1, 63.0, 55.1, 50.7, 17.6 ppm; **HRMS (ESI)** calculated  $[\text{M}+\text{H}]^+$  for  $\text{C}_{15}\text{H}_{22}\text{NO}_2$  = 248.1645, found: 248.1637.

**(S,E)-4-(4-(4-methoxyphenyl)but-3-en-2-yl)morpholine (3am)**: with **A4**, 24 h, obtained pale

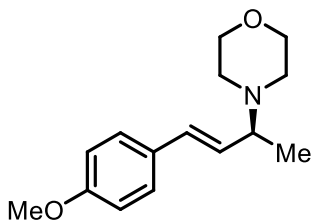

yellow oil 49.3 mg; Isolated yield: 99%; > 99% ee;  $[\alpha]_{\text{D}}^{25} = -80.8$  ( $c = 1.0$ ,  $\text{CHCl}_3$ ); The enantiomeric excess was determined by HPLC on Chiralpak OJ-H column, hexane: isopropanol = 95:5, flow rate = 1.0 mL/min, UV detection at 254 nm,  $t_{\text{R}} = 20.6$  min (minor), 29.0 min (major);  $^1\text{H NMR}$  (400 MHz,  $\text{CDCl}_3$ )  $\delta$  7.31 (d,  $J = 8.7$  Hz, 2H), 6.85 (d,  $J = 8.7$  Hz, 2H), 6.41 (d,  $J = 15.9$  Hz, 1H), 6.02 (dd,  $J = 15.9, 8.3$  Hz, 1H), 3.81 (s, 3H), 3.74 (t,  $J = 4.7$  Hz, 4H), 3.03-2.96 (m, 1H), 2.61-2.53 (m, 4H), 1.26 (d,  $J = 6.5$  Hz, 3H) ppm;  $^{13}\text{C NMR}$  (100 MHz,  $\text{CDCl}_3$ )  $\delta$  159.1, 130.8, 129.6, 129.5, 127.4, 113.9, 67.10, 63.2, 55.3, 50.7, 17.8 ppm; **HRMS (ESI)** calculated  $[\text{M}+\text{Na}]^+$  for  $\text{C}_{15}\text{H}_{21}\text{NNaO}_2$  = 270.1465, found: 270.1464.

**(S,E)-4-(4-(4-fluorophenyl)but-3-en-2-yl)morpholine (3an):** with **A4**, 24 h, obtained pale

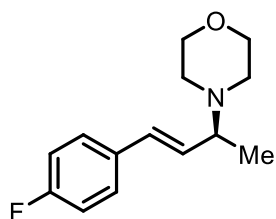

yellow oil 47.2 mg; Isolated yield: 99%; > 99% ee;  $[\alpha]_{\text{D}}^{25} = -70.3$  (c = 1.0,  $\text{CHCl}_3$ ); The enantiomeric excess was determined by HPLC on Chiralpak OJ-H column, hexane: isopropanol = 95:5, flow rate = 0.5 mL/min, UV detection at 254 nm,  $t_{\text{R}} = 16.0$  min (minor), 17.5 min (major);  $^1\text{H NMR}$  (400 MHz,  $\text{CDCl}_3$ )  $\delta$  7.36-7.31 (m, 2H), 7.03-6.97 (m, 2H), 6.43 (d,  $J = 15.9$  Hz, 1H), 6.08 (dd,  $J = 15.9, 8.2$  Hz, 1H), 3.74 (t,  $J = 4.7$  Hz, 4H), 3.04-2.97 (m, 1H), 2.58-2.54 (m, 4H), 1.25 (d,  $J = 6.6$  Hz, 3H) ppm;  $^{13}\text{C NMR}$  (100 MHz,  $\text{CDCl}_3$ )  $\delta$  162.2 (d,  $J = 246.6$  Hz), 133.0 (d,  $J = 3.3$  Hz), 131.8 (d,  $J = 2.1$  Hz), 130.0, 127.7 (d,  $J = 7.9$  Hz), 115.4 (d,  $J = 21.6$  Hz), 67.2, 63.0, 50.7, 17.7 ppm;  $^{19}\text{F NMR}$  (376 MHz,  $\text{CDCl}_3$ )  $\delta$  -114.64 ppm; **HRMS (ESI)** calculated  $[\text{M}+\text{H}]^+$  for  $\text{C}_{14}\text{H}_{19}\text{FNO} = 236.1445$ , found: 236.1442.

**(S,E)-4-(4-(4-(trifluoromethyl)phenyl)but-3-en-2-yl)morpholine (3ao):** with **A4**, 24 h,

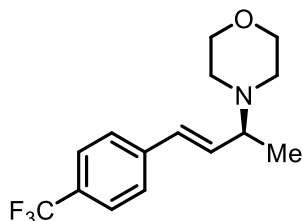

obtained pale yellow oil 57.1 mg; Isolated yield: 99%; 93% ee;  $[\alpha]_{\text{D}}^{25} = -48.3$  (c = 1.0,  $\text{CHCl}_3$ ); The enantiomeric excess was determined by HPLC on Chiralpak AD-H column, hexane: isopropanol = 99:1, flow rate = 0.5 mL/min, UV detection at 254 nm,  $t_{\text{R}} = 15.0$  min (major), 17.8 min (minor);  $^1\text{H NMR}$  (400 MHz,  $\text{CDCl}_3$ )  $\delta$  7.56 (d,  $J = 8.2$  Hz, 2H), 7.46 (d,  $J = 8.4$  Hz, 2H), 6.50 (d,  $J = 16.0$  Hz, 1H), 6.28 (dd,  $J = 16.0, 8.0$  Hz, 1H), 3.75-3.72 (m, 4H), 3.10-3.02 (m, 1H), 2.58-2.55 (m, 4H), 1.27 (d,  $J = 6.6$  Hz, 3H) ppm;  $^{13}\text{C NMR}$  (100 MHz,  $\text{CDCl}_3$ )  $\delta$  140.3 (q,  $J = 1.9$  Hz), 135.0, 129.9, 129.2 (q,  $J = 32.4$  Hz), 126.4, 125.5 (q,  $J = 3.8$  Hz), 124.1 (q,  $J = 270.9$  Hz), 67.1, 62.9, 50.7, 17.5 ppm;  $^{19}\text{F NMR}$  (376 MHz,  $\text{CDCl}_3$ )  $\delta$  -62.38 ppm; **HRMS (ESI)** calculated  $[\text{M}+\text{H}]^+$  for  $\text{C}_{15}\text{H}_{19}\text{F}_3\text{NO} = 286.1413$ , found: 286.1418.

**(S,E)-N,N-dimethyl-4-(3-morpholinobut-1-en-1-yl)aniline (3ap):** with **A4**, 24 h, obtained pale

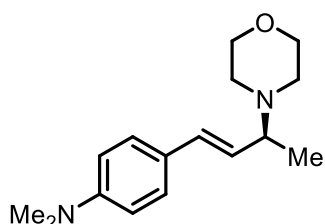

yellow oil 38.8 mg; Isolated yield: 74%; > 99% ee;  $[\alpha]_{\text{D}}^{25} = -98.5$  (c = 1.0,  $\text{CHCl}_3$ ); The enantiomeric excess was determined by HPLC on Chiralpak OD-H column, hexane: isopropanol = 99:1, flow rate = 0.5 mL/min, UV detection at 254 nm,  $t_{\text{R}} = 19.5$  min (major), 21.3 min (minor);  $^1\text{H NMR}$  (400 MHz,  $\text{CDCl}_3$ )  $\delta$  7.28-7.25 (m, 2H), 6.69-6.67 (m, 2H), 6.37 (d,  $J = 15.8$  Hz, 1H), 5.94 (dd,  $J = 15.9, 8.3$  Hz, 1H), 3.73 (t,  $J = 4.7$  Hz, 4H), 3.00-2.97 (m, 1H), 2.95 (s, 6H), 2.61-2.52 (m, 4H), 1.25 (d,  $J = 6.5$  Hz, 3H) ppm;  $^{13}\text{C NMR}$  (100 MHz,  $\text{CDCl}_3$ )  $\delta$  150.0, 131.2, 127.5, 127.1, 125.4, 112.5, 67.2, 63.4, 50.8, 40.6, 18.0 ppm; **HRMS (ESI)** calculated  $[\text{M}+\text{H}]^+$  for  $\text{C}_{16}\text{H}_{25}\text{N}_2\text{O} = 261.1961$ , found: 261.1960.

**(S,E)-4-(4-(furan-2-yl)but-3-en-2-yl)morpholine (3aq):** with **A4**, 36 h, obtained pale yellow oil

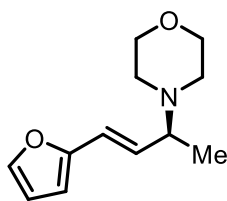

41.4 mg; Isolated yield: 99%; 96% ee;  $[\alpha]_D^{25} = -73.8$  ( $c = 1.0$ ,  $\text{CHCl}_3$ ); The enantiomeric excess was determined by HPLC on Chiralpak OJ-H column, hexane: isopropanol = 95:5, flow rate = 0.5 mL/min, UV detection at 254 nm,  $t_R = 16.6$  min (minor), 18.7 min (major);  **$^1\text{H NMR}$**  (400 MHz,  $\text{CDCl}_3$ )  $\delta$  7.33 (d,  $J = 1.8$  Hz, 1H), 6.36 (dd,  $J = 3.3, 1.8$  Hz, 1H), 6.31-6.27 (m, 1H), 6.20 (d,  $J = 3.3$  Hz, 1H), 6.11 (dd,  $J = 15.9, 8.1$  Hz, 1H), 3.72 (t,  $J = 4.7$  Hz, 4H), 3.04-2.97 (m, 1H), 2.60-2.50 (m, 4H), 1.23 (d,  $J = 6.6$  Hz, 3H) ppm;  **$^{13}\text{C NMR}$**  (100 MHz,  $\text{CDCl}_3$ )  $\delta$  152.5, 141.7, 130.7, 119.7, 111.2, 107.3, 67.2, 62.7, 50.5, 17.5 ppm; **HRMS (ESI)** calculated  $[\text{M}+\text{H}]^+$  for  $\text{C}_{12}\text{H}_{18}\text{NO}_2 = 208.1332$ , found: 208.1333.

**(S,E)-2-(4-(4-cyclohexylbut-3-en-2-yl)piperazin-1-yl)pyrimidine (3ar):** with **A4**, 24 h,

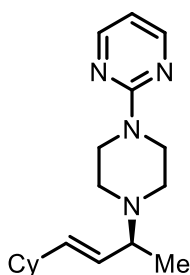

obtained colourless oil 34.7 mg; Isolated yield: 58%; 96% ee;  $[\alpha]_D^{25} = -17.7$  ( $c = 1.0$ ,  $\text{CHCl}_3$ ); The enantiomeric excess was determined by HPLC on Chiralpak OJ-H column, hexane: isopropanol = 95:5, flow rate = 0.5 mL/min, UV detection at 254 nm,  $t_R = 8.8$  min (minor), 9.5 min (major);  **$^1\text{H NMR}$**  (400 MHz,  $\text{CDCl}_3$ )  $\delta$  8.29 (d,  $J = 4.7$  Hz, 2H), 6.46 (t,  $J = 4.7$  Hz, 1H), 5.47 (dd,  $J = 15.6, 6.4$  Hz, 1H), 5.37-5.31 (m, 1H), 3.83-3.81 (m, 4H), 2.93-2.86 (m, 1H), 2.62-2.49 (m, 4H), 1.99-1.90 (m, 1H), 1.72-1.69 (m, 4H), 1.66-1.62 (m, 1H), 1.28-1.22 (m, 3H), 1.18 (d,  $J = 6.6$  Hz, 3H), 1.14-1.02 (m, 2H) ppm;  **$^{13}\text{C NMR}$**  (100 MHz,  $\text{CDCl}_3$ )  $\delta$  161.6, 157.7, 138.5, 128.7, 109.6, 62.5, 49.6, 43.8, 40.4, 33.04, 32.97, 26.1, 26.0, 18.1 ppm; **HRMS (ESI)** calculated  $[\text{M}+\text{H}]^+$  for  $\text{C}_{18}\text{H}_{29}\text{N}_4 = 301.2387$ , found: 301.2380.

**(S,E)-2-(4-(6-phenylhex-3-en-2-yl)piperazin-1-yl)pyrimidine (3as):** with **A4**, 24 h, obtained

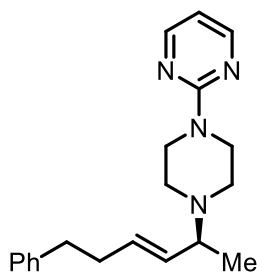

colorless oil 63.5 mg; Isolated yield: 98%; > 99% ee;  $[\alpha]_D^{25} = -14.2$  ( $c = 1.0$ ,  $\text{CHCl}_3$ ); The enantiomeric excess was determined by HPLC on Chiralpak OD-H column, hexane: isopropanol = 95:5, flow rate = 0.5 mL/min, UV detection at 254 nm,  $t_R = 19.2$  min (major), 21.7 min (minor);  **$^1\text{H NMR}$**  (400 MHz,  $\text{CDCl}_3$ )  $\delta$  8.30 (d,  $J = 4.7$  Hz, 2H), 7.28-7.24 (m, 2H), 7.17-7.13 (m, 3H), 6.46 (t,  $J = 4.7$  Hz, 1H), 5.52 (dt,  $J = 15.3, 6.5$  Hz, 1H), 5.37 (ddt,  $J = 15.4, 8.0, 1.2$  Hz, 1H), 3.78 (t,  $J = 5.2$  Hz, 4H), 2.91-2.84 (m, 1H), 2.76-2.64 (m, 2H), 2.51-2.41 (m, 4H), 2.39-2.33 (m, 2H), 1.14 (d,  $J = 6.6$  Hz, 3H) ppm;  **$^{13}\text{C NMR}$**  (100 MHz,  $\text{CDCl}_3$ )  $\delta$  161.6, 157.7, 141.7, 132.6, 131.2, 128.5, 128.2, 125.8, 109.6, 62.3, 49.6, 43.8, 35.6, 34.0, 17.9 ppm; **HRMS (ESI)** calculated  $[\text{M}+\text{H}]^+$  for  $\text{C}_{20}\text{H}_{27}\text{N}_4 = 323.2230$ , found: 323.2224.

**(S,E)-4-(6-phenylhex-3-en-2-yl)morpholine (3at):** with **A4**, 24 h, obtained colorless oil 43.1

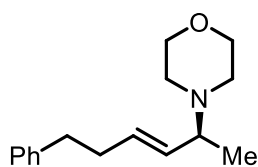

mg; Isolated yield: 88%; > 99% ee;  $[\alpha]_{\text{D}}^{25} = -21.8$  ( $c = 1.0$ ,  $\text{CHCl}_3$ ); The enantiomeric excess was determined by HPLC on Chiralpak OJ-H column, hexane: isopropanol = 95:5, flow rate = 0.5 mL/min, UV detection at 220 nm,  $t_{\text{R}} = 13.1$  min (minor), 14.4 min (major);  **$^1\text{H NMR}$**  (400 MHz,  $\text{CDCl}_3$ )  $\delta$  7.28-7.24 (m, 2H), 7.18-7.15 (m, 3H), 5.52 (dt,  $J = 15.2, 6.6$  Hz, 1H), 5.32 (ddt,  $J = 15.3, 8.1, 1.4$  Hz, 1H), 3.66 (t,  $J = 5.2$  Hz, 4H), 2.79-2.64 (m, 3H), 2.40-2.33 (m, 6H), 1.10 (d,  $J = 6.5$  Hz, 3H) ppm;  **$^{13}\text{C NMR}$**  (100 MHz,  $\text{CDCl}_3$ )  $\delta$  141.7, 132.8, 131.3, 128.5, 128.3, 125.8, 67.2, 62.8, 50.5, 35.7, 34.0, 17.8 ppm; **HRMS (ESI)** calculated  $[\text{M}+\text{H}]^+$  for  $\text{C}_{16}\text{H}_{24}\text{NO} = 246.1852$ , found: 246.1847.

**(S)-N-(furan-2-ylmethyl)cyclohex-2-en-1-amine (3au):** with **A4**, 24 h, obtained pale yellow oil

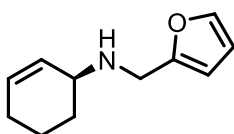

17.4 mg; Isolated yield: 28%; 22% ee;  $[\alpha]_{\text{D}}^{25} = -13.5$  ( $c = 1.0$ ,  $\text{CHCl}_3$ ); The enantiomeric excess was determined by HPLC on Chiralpak AS-H column, hexane: isopropanol = 99:1, flow rate = 0.5 mL/min, UV detection at 220 nm;  $t_{\text{R}} = 19.0$  min (major), 21.9 min (minor);  **$^1\text{H NMR}$**  (400 MHz,  $\text{CDCl}_3$ )  $\delta$  7.35 (dd,  $J = 1.9, 0.9$  Hz, 1H), 6.31 (dd,  $J = 3.1, 1.9$  Hz, 1H), 6.18 (dd,  $J = 3.1, 0.8$  Hz, 1H), 5.80-5.75 (m, 1H), 5.70-5.66 (m, 1H), 3.89-3.80 (m, 2H), 3.23-3.17 (m, 1H), 2.02-1.96 (m, 2H), 1.90-1.85 (m, 1H), 1.78-1.71 (m, 1H), 1.60-1.41 (m, 2H) ppm;  **$^{13}\text{C NMR}$**  (100 MHz,  $\text{CDCl}_3$ )  $\delta$  154.0, 141.7, 129.4, 129.2, 110.1, 106.7, 52.0, 43.4, 29.2, 25.2, 20.1 ppm; **HRMS (ESI)** calculated  $[\text{M}+\text{H}]^+$  for  $\text{C}_{11}\text{H}_{16}\text{NO} = 178.1226$ , found: 178.1221.

**(S,E)-2-((4-phenylbut-3-en-2-yl)amino)ethan-1-ol (3av):** with **A4**, 24 h, obtained pale yellow

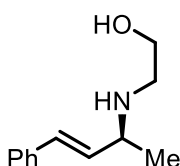

oil 34.8 mg; Isolated yield: 91%; > 99% ee;  $[\alpha]_{\text{D}}^{25} = -54.8$  ( $c = 1.0$ ,  $\text{CHCl}_3$ ); The enantiomeric excess was determined by (converting it to compound **Bz-3av**) HPLC on Chiralpak AS-H column, hexane: isopropanol = 85:15; flow rate = 1.0 mL/min, UV detection at 254 nm,  $t_{\text{R}} = 20.0$  min (major), 24.7 min (minor);  **$^1\text{H NMR}$**  (400 MHz,  $\text{CDCl}_3$ )  $\delta$  7.39-7.37 (m, 2H), 7.32-7.29 (m, 2H), 7.25-7.21 (m, 1H), 6.50 (d,  $J = 15.9$  Hz, 1H), 6.12 (dd,  $J = 15.9, 8.1$  Hz, 1H), 3.76-3.67 (m, 2H), 3.53-3.41 (m, 1H), 3.41 (br, s, 1H), 3.32 (br, s, 1H), 2.93-2.79 (m, 2H), 1.35 (d,  $J = 6.5$  Hz, 3H) ppm;  **$^{13}\text{C NMR}$**  (100 MHz,  $\text{CDCl}_3$ )  $\delta$  136.4, 131.6, 131.5, 128.5, 127.7, 126.4, 60.3, 56.3, 48.5, 21.2 ppm; **HRMS (ESI)** calculated  $[\text{M}+\text{H}]^+$  for  $\text{C}_{12}\text{H}_{18}\text{NO} = 192.1383$ , found: 192.1381.

**(S,E)-N1-benzyl-N1-(4-phenylbut-3-en-2-yl)ethane-1,2-diamine (3aw):** with **A4**, 24 h,

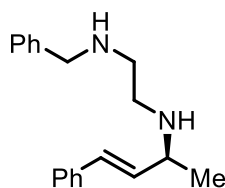

obtained pale yellow oil 46.5 mg; Isolated yield: 83%; 98% ee;  $[\alpha]_{\text{D}}^{25} = -56.6$  ( $c = 1.0$ ,  $\text{CHCl}_3$ ); The enantiomeric excess was determined by (converting it to compound **Bz-3aw**) HPLC on Chiralpak AD-H column, hexane: isopropanol = 85:15, flow rate = 1.0 mL/min, UV detection at 254 nm,  $t_{\text{R}} = 24.4$  min (minor), 27.6 min (major);  **$^1\text{H NMR}$**  (400 MHz,  $\text{CDCl}_3$ )  $\delta$  7.37-7.35 (m, 2H), 7.32-7.28 (m, 6H), 7.25-7.19 (m, 2H), 6.44 (d,  $J = 15.9$  Hz, 1H),

6.05 (dd,  $J = 15.9, 7.9$  Hz, 1H), 3.79 (s, 2H), 3.35-3.28 (m, 1H), 2.81-2.65 (m, 4H), 1.25 (br, s, 2H), 1.25 (d,  $J = 6.5$  Hz, 3H) ppm;  $^{13}\text{C NMR}$  (100 MHz,  $\text{CDCl}_3$ )  $\delta$  140.3, 137.0, 134.2, 129.9, 128.5, 128.4, 128.1, 127.3, 126.9, 126.3, 56.3, 53.8, 48.8, 46.9, 22.0 ppm; **HRMS (ESI)** calculated  $[\text{M}+\text{H}]^+$  for  $\text{C}_{19}\text{H}_{25}\text{N}_2 = 281.2012$ , found: 282.2011.

**(S,E)-2-(((4-phenylbut-3-en-2-yl)amino)methyl)phenol (3ax)**: with **A4**, 24 h, obtained pale yellow oil 47.6 mg; Isolated yield: 94%; 97% ee;  $[\alpha]_{\text{D}}^{25} = -110.6$  ( $c = 1.0$ ,  $\text{CHCl}_3$ ); The enantiomeric excess was determined by HPLC on Chiralpak AD-H column, hexane: isopropanol = 99:1, flow rate = 0.5 mL/min, UV detection at 254 nm,  $t_{\text{R}} = 31.9$  min (major), 37.2 min (minor);  $^1\text{H NMR}$  (400

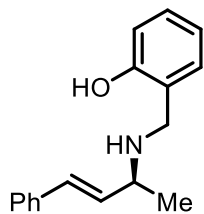

MHz,  $\text{CDCl}_3$ )  $\delta$  7.38-7.30 (m, 4H), 7.26-7.22 (m, 1H), 7.18-7.14 (m, 1H), 6.96-6.94 (m, 1H), 6.84 (dd,  $J = 8.1, 1.2$  Hz, 1H), 6.78-6.74 (m, 1H), 6.46 (d,  $J = 15.9$  Hz, 1H), 6.03 (dd,  $J = 15.9, 8.2$  Hz, 1H), 4.07 (d,  $J = 14.0$  Hz, 1H), 3.91 (d,  $J = 13.9$  Hz, 1H), 3.45-3.38 (m, 1H), 1.32 (d,  $J = 6.5$  Hz, 3H) ppm;  $^{13}\text{C NMR}$  (100 MHz,  $\text{CDCl}_3$ )  $\delta$  158.2, 136.5, 131.7, 131.5, 128.6, 128.6, 128.3, 127.7, 126.3, 122.7, 119.1, 116.4, 55.1, 50.0, 21.7 ppm; **HRMS (ESI)** calculated  $[\text{M}+\text{Na}]^+$  for  $\text{C}_{17}\text{H}_{19}\text{NO} = 276.1359$ , found: 276.1361.

**(S,E)-2-(2-(((4-phenylbut-3-en-2-yl)amino)phenyl)ethan-1-ol (3ay)**: with **A3**, 24 h, obtained white solid 31.4 mg; Isolated yield: 59%; 91% ee;  $[\alpha]_{\text{D}}^{25} = -114.1$  ( $c = 1.0$ ,  $\text{CHCl}_3$ ); The enantiomeric excess was determined by HPLC on Chiralpak OD-H column, hexane: isopropanol = 80:20, flow rate = 0.5

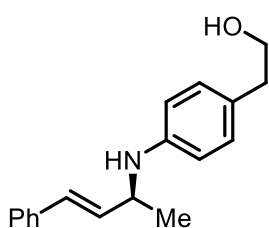

mL/min, UV detection at 254 nm,  $t_{\text{R}} = 24.7$  min (major), 28.9 min (minor);  $^1\text{H NMR}$  (400 MHz,  $\text{CDCl}_3$ )  $\delta$  7.37-7.34 (m, 2H), 7.31-7.27 (m, 2H), 7.23- 7.19 (m, 1H), 7.03-7.00 (m, 2H), 6.63-6.60 (m, 2H), 6.57 (dd,  $J = 15.9, 1.3$  Hz, 1H), 6.20 (dd,  $J = 15.9, 5.9$  Hz, 1H), 4.15-4.08 (m, 1H), 3.78 (t,  $J = 6.5$  Hz, 2H), 2.74 (t,  $J = 6.5$  Hz, 2H), 1.40 (d,  $J = 6.6$  Hz, 3H) ppm;  $^{13}\text{C NMR}$  (100 MHz,  $\text{CDCl}_3$ )  $\delta$  146.0, 136.9, 133.2, 129.8, 129.2, 128.5, 127.3, 126.7, 126.3, 113.6, 63.9, 51.0, 38.2, 22.1 ppm; **HRMS (ESI)** calculated  $[\text{M}+\text{Na}]^+$  for  $\text{C}_{18}\text{H}_{21}\text{NNO} = 290.1532$ , found: 290.1531.

**(S,E)-N-(2-(1H-indol-3-yl)ethyl)-4-phenylbut-3-en-2-amine (3az)**: with **A4**, 24 h, obtained pale yellow oil 58.2 mg; Isolated yield: 99%; > 99% ee;  $[\alpha]_{\text{D}}^{25} = -76.2$  ( $c = 1.0$ ,  $\text{CHCl}_3$ ); The enantiomeric excess was determined by HPLC on Chiralpak AS-H column, hexane: isopropanol = 99:1, flow rate = 0.5

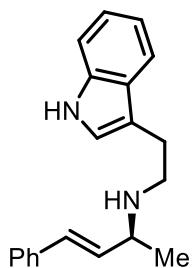

mL/min, UV detection at 254 nm;  $t_{\text{R}} = 69.3$  min (minor), 75.3 min (major);  $^1\text{H NMR}$  (400 MHz,  $\text{CDCl}_3$ )  $\delta$  8.12 (s, 1H), 7.62 (d,  $J = 7.9$  Hz, 1H), 7.37-7.27 (m, 5H), 7.23-7.17 (m, 2H), 7.10 (t,  $J = 7.5$  Hz, 1H), 7.04 (d,  $J = 2.3$  Hz, 1H), 6.42 (d,  $J = 15.9$  Hz, 1H), 6.06 (dd,  $J = 15.9, 8.0$  Hz, 1H), 3.41-3.34 (m, 1H), 3.04-2.92 (m, 4H), 1.97 (br, s, 1H), 1.22 (d,  $J = 6.4$  Hz, 3H) ppm;  $^{13}\text{C NMR}$  (100 MHz,  $\text{CDCl}_3$ )  $\delta$  137.0, 136.4, 134.1, 129.9, 128.5, 127.4, 127.3, 126.2, 122.02, 121.98, 119.2, 118.9, 113.8, 111.1,

56.2, 47.4, 25.8, 22.0 ppm; **HRMS (ESI)** calculated  $[M+Na]^+$  for  $C_{20}H_{22}N_2Na$  = 313.1675, found: 313.1675.

**(S,E)-4-(((4-phenylbut-3-en-2-yl)amino)methyl)aniline (3ba)**: with **A3**, 24 h, obtained pale yellow oil 20.4 mg; Isolated yield: 40%; > 99% ee;  $[\alpha]_D^{25} = -148.5$  (c = 1.0,  $CHCl_3$ );

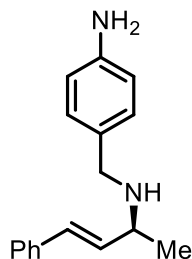

The enantiomeric excess was determined by HPLC on Chiralpak AS-H column, hexane: isopropanol = 90:10, flow rate = 0.5 mL/min, UV detection at 254 nm,  $t_R$  = 25.8 min (major), 28.8 min (minor);  **$^1H$  NMR** (400 MHz,  $CDCl_3$ )  $\delta$  7.40-7.37(m, 2H), 7.33-7.29 (m, 2H), 7.24-7.20 (m, 1H), 7.12-7.09 (m, 2H), 6.67-6.63 (m, 2H), 6.47 (d,  $J$  = 15.9 Hz, 1H), 6.11 (dd,  $J$  = 15.9, 8.0 Hz, 1H), 3.73 (d,  $J$  = 12.8 Hz, 1H), 3.61 (d,  $J$  = 12.9 Hz, 1H),

3.43-3.36 (m, 1H), 1.25 (d,  $J$  = 6.5 Hz, 3H) ppm;  **$^{13}C$  NMR** (100 MHz,  $CDCl_3$ )  $\delta$  145.2, 137.1, 134.2, 130.4, 130.1, 129.3, 128.5, 127.3, 126.2, 115.1, 55.3, 51.0, 22.0 ppm; **HRMS (ESI)** calculated  $[M+H]^+$  for  $C_{17}H_{21}N_2$  = 253.1699, found: 253.1670.

**(S,E)-4-(4-cyclohexylbut-3-en-2-yl)morpholine (3bb)**: with **A4**, 24 h, obtained pale yellow oil

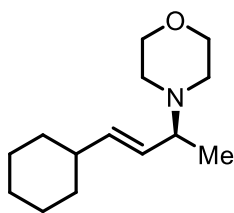

29.8 mg; Isolated yield: 67%; The enantiomeric excess couldn't be determined;  $[\alpha]_D^{25} = -25.2$  (c = 1.0,  $CHCl_3$ );  **$^1H$  NMR** (400 MHz,  $CDCl_3$ )  $\delta$  5.47 (dd,  $J$  = 15.5, 6.5 Hz, 1H), 5.32-5.26 (m, 1H), 3.71 (t,  $J$  = 4.7 Hz, 4H), 2.81-2.74 (m, 1H), 2.55-2.42 (m, 4H), 1.97-1.89 (m, 1H), 1.74-1.67 (m, 4H), 1.67-1.62 (m, 1H), 1.32-1.16 (m, 3H), 1.14 (d,  $J$  = 6.5 Hz, 3H),

1.12-1.01 (m, 2H) ppm;  **$^{13}C$  NMR** (100 MHz,  $CDCl_3$ )  $\delta$  138.6, 128.9, 67.2, 62.9, 50.5, 40.4, 33.1, 33.0, 26.2, 26.0, 18.0 ppm; **HRMS (ESI)** calculated  $[M+H]^+$  for  $C_{14}H_{26}NO$  = 224.2009, found: 224.2011.

**(S,E)-1-(4-phenylbut-3-en-2-yl)piperidine-4-carboxamide (3bc)**: white solid 44.9 mg;

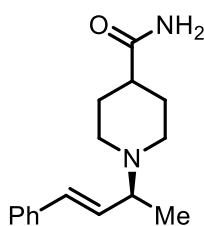

Isolated yield: 87%; The enantiomeric excess couldn't be determined;  $[\alpha]_D^{25} = -35.4$  (c = 1.0,  $CHCl_3$ );  **$^1H$  NMR** (400 MHz,  $CDCl_3$ )  $\delta$  7.38-3.36 (m, 2H), 7.33-7.29 (m, 2H), 7.24-7.20 (m, 1H), 6.44 (d,  $J$  = 15.9 Hz, 1H), 6.20 (dd,  $J$  = 15.9, 7.9 Hz, 1H), 5.52 (br, s, 2H), 3.16-3.07 (m, 2H), 3.05-3.00 (m, 1H), 2.18-2.09 (m, 3H), 1.94-1.87 (m, 2H), 1.80-1.67 (m, 2H), 1.25 (d,  $J$  =

6.6 Hz, 3H) ppm;  **$^{13}C$  NMR** (100 MHz,  $CDCl_3$ )  $\delta$  177.7, 137.0, 132.2, 130.7, 128.5, 127.3, 126.2, 62.4, 49.7, 49.5, 43.0, 29.2, 29.1, 17.6 ppm; **HRMS (ESI)** calculated  $[M+H]^+$  for  $C_{16}H_{23}N_2O$  = 218.1176, found: 218.1177.

**(S,E)-8-chloro-11-(1-(4-phenylbut-3-en-2-yl)piperidin-4-ylidene)-6,11-dihydro-5H-**

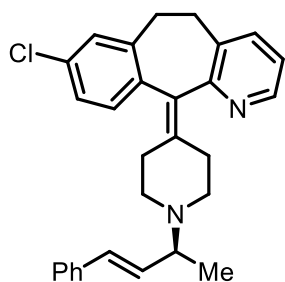

**benzo[5,6]cyclohepta[1,2-b]pyridine (3bd):** with **A4**, 48 h, obtained reddish orange oil 88.1 mg; Isolated yield: 99%; The enantiomeric excess couldn't be determined;  $[\alpha]_D^{25} = -64.3$  ( $c = 1.0$ ,  $\text{CHCl}_3$ ); **3ay:**  $^1\text{H NMR}$  (400 MHz,  $\text{CDCl}_3$ )  $\delta$  8.40-8.38 (m, 1H), 7.42 (dd,  $J = 7.7, 1.7$  Hz, 1H), 7.37-7.28 (m, 4H), 7.24-7.20 (m, 1H), 7.14-7.11 (m, 3H), 7.09-7.06 (m, 1H), 6.42 (d,  $J = 15.9$  Hz, 1H), 6.25-6.19 (m, 1H), 3.44-3.32 (m, 2H), 3.20-3.11 (m, 1H), 2.93-2.74 (m, 4H),

2.56-2.32 (m, 6H), 1.26 (d,  $J = 6.6$  Hz, 3H) ppm;  $^{13}\text{C NMR}$  (100 MHz,  $\text{CDCl}_3$ )  $\delta$  157.62, 146.57, 139.46, 139.09, 137.72, 137.20, 136.93, 133.40, 132.56, 132.38, 132.08, 130.90, 130.82, 128.93, 128.51, 127.34, 126.24, 125.94, 122.04, 62.38, 51.63, 51.42, 31.83, 31.40, 31.08, 30.87, 17.83 ppm; **3ay':**  $^1\text{H NMR}$  (400 MHz,  $\text{CDCl}_3$ )  $\delta$  8.40-8.38 (m, 1H), 7.42 (dd,  $J = 7.7, 1.7$  Hz, 1H), 7.37-7.28 (m, 4H), 7.24-7.20 (m, 1H), 7.14-7.11 (m, 3H), 7.09-7.06 (m, 1H), 6.42 (d,  $J = 15.9$  Hz, 1H), 6.25-6.19 (m, 1H), 3.44-3.32 (m, 2H), 3.20-3.11 (m, 1H), 2.93-2.74 (m, 4H), 2.56-2.32 (m, 6H), 1.26 (d,  $J = 6.6$  Hz, 3H) ppm;  $^{13}\text{C NMR}$  (100 MHz,  $\text{CDCl}_3$ )  $\delta$  157.57, 146.57, 139.46, 139.09, 137.67, 137.16, 136.92, 133.40, 132.56, 132.38, 131.97, 130.87, 130.77, 128.90, 128.51, 127.34, 126.22, 125.94, 122.04, 62.35, 51.63, 51.37, 31.81, 31.38, 31.08, 30.80, 17.78 ppm; **HRMS (ESI)** calculated  $[\text{M}+\text{Na}]^+$  for  $\text{C}_{29}\text{H}_{29}\text{ClN}_2\text{Na} = 463.1911$ , found: 463.1907.

**Non-reactive and inefficient substrates**

we also have prepared two disubstituted dienes **1k** and **1l**, and examined them in the hydroamination reaction. It was found that substrate **1k** could participate in the reaction to afford the corresponding product **3be** in 22% yield and 68% ee. However, substrate **1l** failed to provide the desired product (**3bf** and **3bg**) under standard reaction condition.

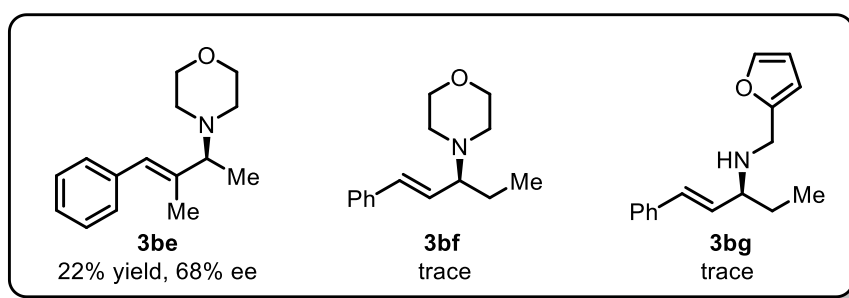

**Figure S245.** Non-reactive and inefficient dienes, related to **Figure 4**.

**Scalability of Asymmetric Hydroamination**

**Scheme S4** (related to **Figure 3**):



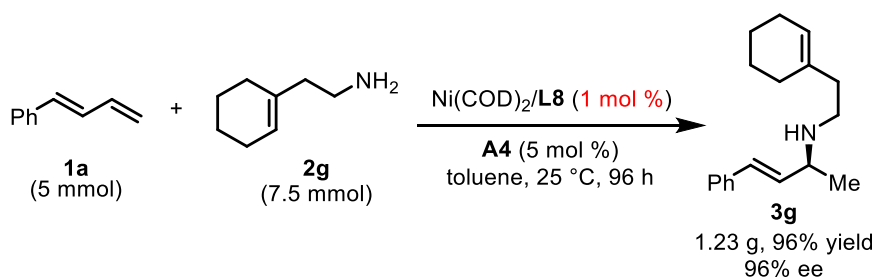

To a 20 mL vial was added the catalyst precursor  $\text{Ni(COD)}_2$  (13.8 mg, 0.05 mmol), **L8** (15.3 mg, 0.05 mmol) and toluene (5 mL) in an argon-filled glovebox. The mixture was stirred for 1 h at room temperature to give a clear orange solution. Then 1-phenylbutadiene (651.0 mg, 5.0 mmol, 1.0 equiv), amine (939.1 mg, 7.5 mmol, 1.5 equiv), **A4** (41.5 mg, 0.25 mmol) and another 5 mL toluene was added in the catalyst solution. The reaction vessel was sealed using a PTFE septum and removed from the glovebox, and the mixture was stirred at 25 °C for 96 h. The product was purified by column chromatography on deactivated silica gel with PE/EtOAc=1:1 to yield 1.23 g of **3g** (96% yield, 96% ee), the enantiomeric excess was determined by HPLC on Chiralpak AD-H column.

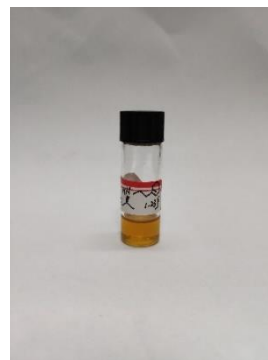

## Transamination Experiments

Scheme S5 (related to Scheme 1):

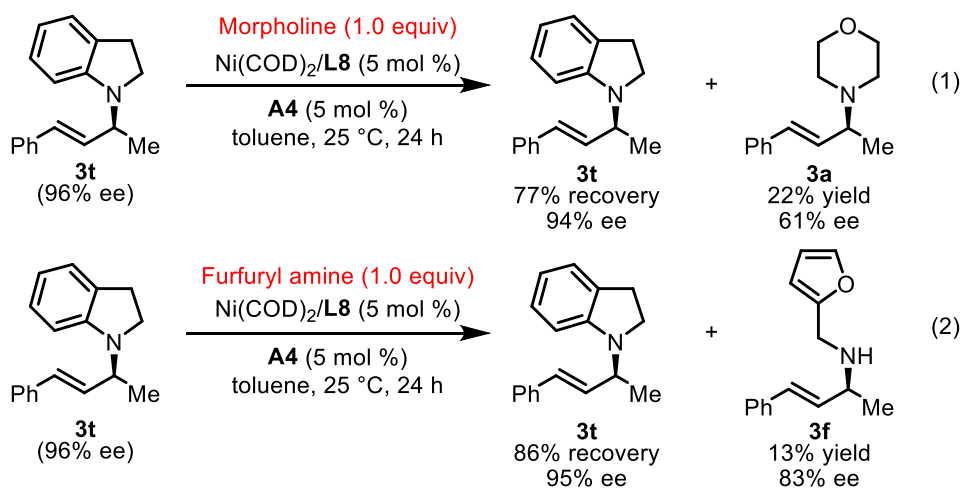

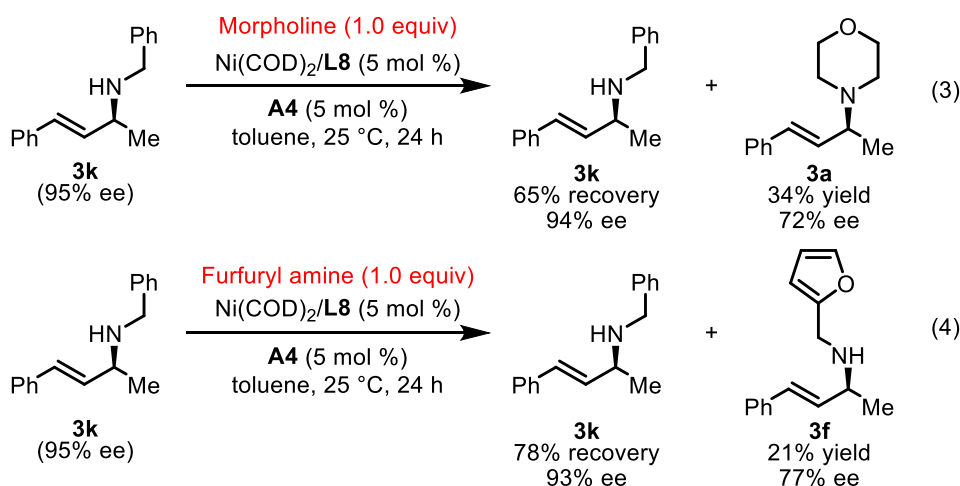

A stock solution was made by mixing  $\text{Ni}(\text{COD})_2$  with **L8** in a 1:1 molar ratio in toluene (0.01 M) at room temperature for 1 h in a argon-filled glovebox. An aliquot of the catalyst solution (0.5 mL, 0.005 mmol) was transferred by syringe into the vials charged with **3t** or **3k** (0.1 mmol, 1.0 equiv), amines (**2a** or **2f**, 0.1 mmol, 1.0 equiv) and naphthalene (3.2 mg, 0.025 mmol, 0.25 equiv), then 0.005 mmol **A4** and another 0.5 mL toluene were added. The reaction vessel was sealed using a PTFE septum and removed from the glovebox, and the mixture was stirred at 25 °C for 24 h. Yields were determined by gas chromatogram analysis, using naphthalene as the internal standard. The ee values were determined by HPLC on a chiral stationary phase.

## Reaction Profiles

**Scheme S6** (related to **Figure 6**)<sup>[a]</sup>:

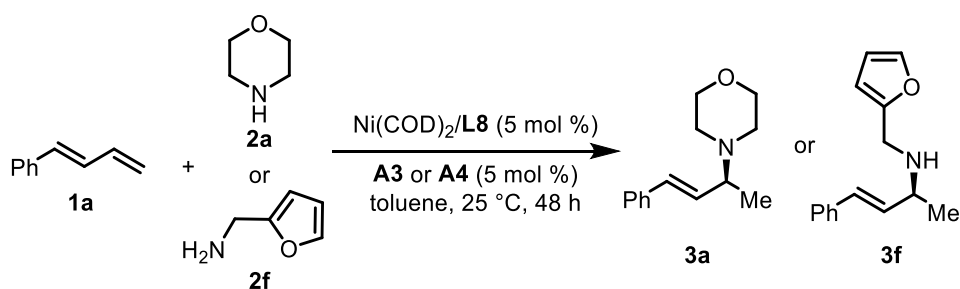

A stock solution was made by mixing  $\text{Ni}(\text{COD})_2$  with **L8** in a 1:1 molar ratio in toluene (0.01 M) at room temperature for 1 h in a argon-filled glovebox. An aliquot of the catalyst solution (1.0 mL, 0.01 mmol) was transferred by syringe into the vials charged with **1a** (0.4 mmol), amines (0.6 mmol for each) and naphthalene (12.8 mg, 0.1 mmol, 0.25 equiv), then **A3** (3.2 mg, 0.02 mmol) or **A4** (3.3 mg, 0.02 mmol) and another 1.0 mL toluene were added. The reaction vessel was sealed using a PTFE septum and stirred at 25 °C in the glovebox. The reaction progress was monitored by GC with naphthalene as the internal standard. The ee values were determined by HPLC on a chiral stationary phase.

| Time [h] | Yield [%] | ee [%] | Yield [%] <sup>[b]</sup> | ee [%] <sup>[b]</sup> | Yield [%] <sup>[c]</sup> | ee [%] <sup>[c]</sup> | Yield [%] <sup>[d]</sup> | ee [%] <sup>[d]</sup> |
|----------|-----------|--------|--------------------------|-----------------------|--------------------------|-----------------------|--------------------------|-----------------------|
| 6 h      | 84        | 98     | 86                       | 97                    | 12                       | 98                    | 91                       | 98                    |
| 12 h     | 99        | 97     | 94                       | 96                    | 19                       | 98                    | 95                       | 98                    |
| 24 h     | 99        | 94     | 99                       | 93                    | 30                       | 97                    | 99                       | 98                    |
| 36 h     | 99        | 91     | 99                       | 92                    | 38                       | 97                    | 98                       | 98                    |
| 48 h     | 99        | 88     | 99                       | 90                    | 39                       | 97                    | 98                       | 98                    |

Reaction conditions: [a] 0.40 mmol **1a**, 0.60 mmol **2a**, 5.0 mol % Ni(COD)<sub>2</sub>/L8, 5.0 mol % **A3**, 1 mL toluene, 25 °C, 48 h. [b] **A4** instead of **A3**. [c] **2f** instead of **2a**. [d] **2f** instead of **2a**, **A4** instead of **A3**.

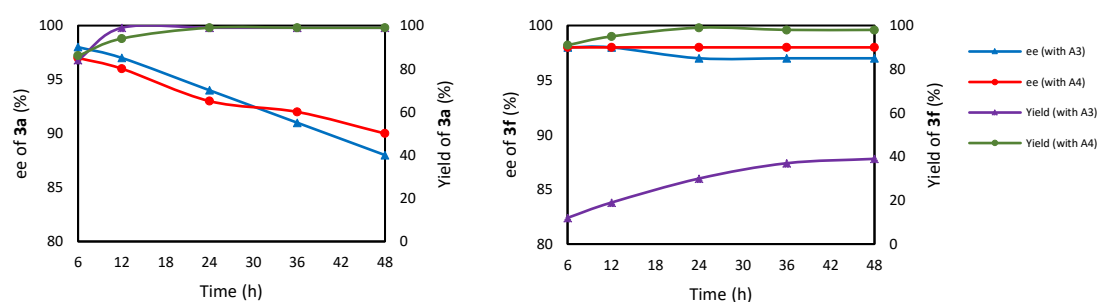

Figure S246. Time Course of Scheme S6.

## Deuterium Labeling Experiments

### Scheme S7:

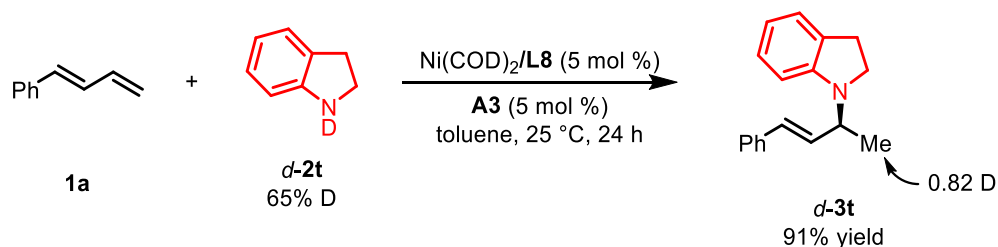

Reaction was carried as described in General Procedure for Ni-catalyzed Asymmetric Hydroamination of Conjugated Dienes. *d*-indoline was prepared by a known previously established method (Yi & Lee, 2009). The *d-3t* was determined by <sup>1</sup>H NMR and <sup>2</sup>H NMR analysis.

## Amines Benzoylation for ee Determination (Wang et al, 2014)

### Scheme S8 (related to Figure 3 and Figure 5):

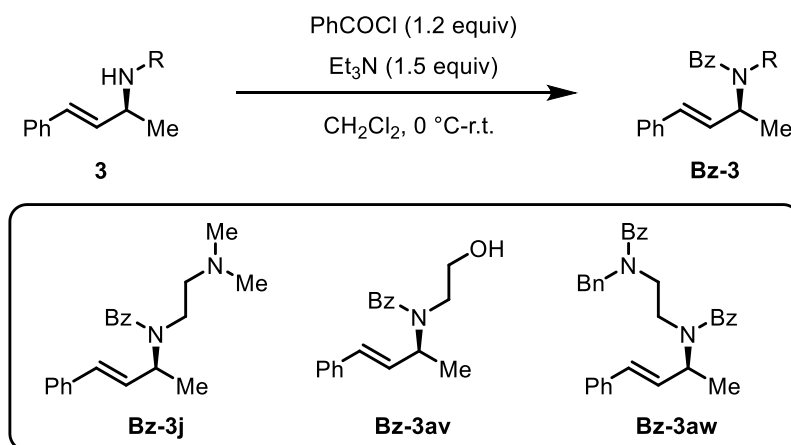

To a solution of chiral amine **3** (0.20 mmol, 1.0 equiv) and triethylamine (42  $\mu\text{L}$ , 0.30 mmol, 1.5 equiv) in DCM (0.8 mL) at 0  $^\circ\text{C}$  was added dropwise a solution of benzoyl chloride (28  $\mu\text{L}$ , 0.24 mmol, 1.2 equiv) in DCM (0.2 mL). The mixture was warmed to room temperature and stirred overnight. The mixture was quenched with water (1.0 mL) and extracted with DCM (5.0 mL), and the aqueous layer was extracted with DCM (3.0 mL). The organic layers were combined, dried over sodium sulfate, and concentrated. The residue was purified by silica gel chromatography, eluting with ethyl acetate/petroleum ether, to give amide **Bz-3**.

## Supplemental References

Adamson, N. J., Hull, E., and Malcolmson, S. J. (2017). Enantioselective Intermolecular Addition of Aliphatic Amines to Acyclic Dienes with a Pd-PHOX Catalyst. *J. Am. Chem. Soc.* 139, 7180–7183.

Davenport, E., and Fernandez, E. (2018). Transition-Metal-Free Synthesis of Vicinal Triborated Compounds and Selective Functionalisation of the Internal C–B Bond. *Chem. Commun.* 54, 10104-10107.

Hu, M.-Y., He, Q., Fan, S.-J., Wang, Z.-C., Liu, L.-Y., Mu, Y.-J., Peng, Q., and Zhu, S.-F. (2018). Ligands with 1,10-Phenanthroline Scaffold for Highly Regioselective Iron-Catalyzed Alkene Hydrosilylation. *Nat. Commun.* 9, 1-11.

Preuß, T., Saak, W., and Doye, S. (2013). Titanium-Catalyzed Intermolecular Hydroaminoalkylation of Conjugated Dienes. *Chem. Eur. J.* 19, 3833-3837.

Sardini, S. R., and Brown, M. K. (2017). Catalyst Controlled Regiodivergent Arylboration of Dienes. *J. Am. Chem. Soc.* 139, 9823-9826.

Wang, Y., Li, M., Ma, X., Liu, C., Gu, Y., and Tian, S.-K. (2014). Deammoniative Condensation of Primary Allylic Amines with Nonallylic Amines. *Chin. J. Chem.* 32, 741-751.

Yi, C. S., and Lee, D. W. (2009). Efficient Dehydrogenation of Amines and Carbonyl Compounds Catalyzed by a Tetranuclear Ruthenium- $\mu$ -oxo- $\mu$ -hydroxo-hydride Complex. *Organometallics* 28, 947-949.
